# Supplementary material for: Impact of Anaerobiosis on Expression of the Iron-Responsive Fur and RyhB Regulons
Source: PubMed Central journal article supplement — mBio. 2015 Dec 15;6(6):e01947-15. doi: 10.1128/mBio.01947-15 (PMC4676285; doi:10.1128/mbio.01947-15), 2015-12-15
Supplement: mbo006152598st7.pdf [file mbo006152598st7.pdf]

**Table S-7. Log<sub>2</sub> expression for all genes in the *E. coli* K12 genome for all experimental conditions**

| <b>gene</b> | <b>WT+O<sub>2</sub></b> | <b><math>\Delta fur</math> +O<sub>2</sub></b> | <b><math>\Delta fur\Delta rylB</math> +O<sub>2</sub></b> | <b><math>\Delta rylB</math> +O<sub>2</sub></b> | <b>WT-O<sub>2</sub></b> | <b><math>\Delta fur</math> -O<sub>2</sub></b> | <b><math>\Delta fur\Delta rylB</math> -O<sub>2</sub></b> | <b><math>\Delta rylB</math> -O<sub>2</sub></b> |
|-------------|-------------------------|-----------------------------------------------|----------------------------------------------------------|------------------------------------------------|-------------------------|-----------------------------------------------|----------------------------------------------------------|------------------------------------------------|
| <i>aaeA</i> | 13.1                    | 13.1                                          | 13.0                                                     | 13.0                                           | 13.2                    | 13.2                                          | 13.1                                                     | 13.1                                           |
| <i>aaeB</i> | 12.8                    | 12.9                                          | 12.7                                                     | 12.8                                           | 12.9                    | 13.0                                          | 12.9                                                     | 12.8                                           |
| <i>aaeR</i> | 15.0                    | 14.8                                          | 14.4                                                     | 14.5                                           | 14.8                    | 15.2                                          | 14.8                                                     | 15.0                                           |
| <i>aaeX</i> | 13.4                    | 13.4                                          | 13.1                                                     | 13.1                                           | 13.3                    | 13.6                                          | 13.4                                                     | 14.0                                           |
| <i>aas</i>  | 14.5                    | 14.3                                          | 14.2                                                     | 14.0                                           | 14.3                    | 14.3                                          | 14.2                                                     | 14.3                                           |
| <i>aat</i>  | 14.8                    | 14.8                                          | 14.7                                                     | 14.3                                           | 14.8                    | 14.9                                          | 14.6                                                     | 14.7                                           |
| <i>abgA</i> | 13.0                    | 13.1                                          | 13.0                                                     | 13.1                                           | 13.2                    | 13.0                                          | 13.1                                                     | 12.8                                           |
| <i>abgB</i> | 13.0                    | 13.0                                          | 12.9                                                     | 13.0                                           | 13.0                    | 13.0                                          | 13.0                                                     | 12.8                                           |
| <i>abgR</i> | 13.4                    | 13.5                                          | 13.2                                                     | 13.4                                           | 13.1                    | 13.4                                          | 13.1                                                     | 13.1                                           |
| <i>abgT</i> | 13.1                    | 13.1                                          | 13.0                                                     | 13.3                                           | 13.1                    | 13.1                                          | 13.0                                                     | 13.0                                           |
| <i>abrB</i> | 13.0                    | 12.9                                          | 12.9                                                     | 13.0                                           | 13.4                    | 13.5                                          | 13.6                                                     | 13.5                                           |
| <i>accA</i> | 17.2                    | 16.8                                          | 16.9                                                     | 17.1                                           | 16.8                    | 16.9                                          | 16.8                                                     | 17.0                                           |
| <i>accB</i> | 18.2                    | 18.1                                          | 18.2                                                     | 18.4                                           | 18.0                    | 18.1                                          | 18.2                                                     | 18.0                                           |
| <i>accC</i> | 17.5                    | 17.3                                          | 17.4                                                     | 17.6                                           | 16.9                    | 17.1                                          | 17.2                                                     | 17.3                                           |
| <i>accD</i> | 17.4                    | 17.2                                          | 17.3                                                     | 17.2                                           | 17.4                    | 17.5                                          | 17.3                                                     | 17.4                                           |
| <i>aceA</i> | 18.9                    | 18.7                                          | 19.4                                                     | 19.0                                           | 17.1                    | 17.7                                          | 17.5                                                     | 17.2                                           |
| <i>aceB</i> | 19.4                    | 19.2                                          | 19.6                                                     | 19.5                                           | 18.2                    | 18.8                                          | 18.5                                                     | 18.4                                           |
| <i>aceE</i> | 18.7                    | 18.8                                          | 18.7                                                     | 18.9                                           | 17.9                    | 17.8                                          | 17.8                                                     | 17.9                                           |
| <i>aceF</i> | 18.5                    | 18.7                                          | 18.4                                                     | 18.6                                           | 17.5                    | 17.7                                          | 17.4                                                     | 17.7                                           |
| <i>aceK</i> | 17.0                    | 16.7                                          | 16.9                                                     | 17.0                                           | 14.6                    | 15.7                                          | 15.1                                                     | 15.2                                           |
| <i>ackA</i> | 16.7                    | 17.4                                          | 16.7                                                     | 16.8                                           | 18.9                    | 19.0                                          | 19.2                                                     | 19.1                                           |
| <i>acnA</i> | 16.0                    | 14.9                                          | 16.2                                                     | 16.0                                           | 13.8                    | 13.7                                          | 13.8                                                     | 13.9                                           |
| <i>acnB</i> | 18.5                    | 17.5                                          | 19.0                                                     | 18.6                                           | 15.7                    | 15.3                                          | 16.0                                                     | 15.9                                           |
| <i>acpH</i> | 14.2                    | 14.2                                          | 13.9                                                     | 13.6                                           | 13.5                    | 13.8                                          | 13.6                                                     | 13.6                                           |
| <i>acpP</i> | 20.0                    | 20.0                                          | 20.1                                                     | 19.8                                           | 20.2                    | 20.1                                          | 20.1                                                     | 20.0                                           |
| <i>acpS</i> | 15.7                    | 15.5                                          | 15.3                                                     | 15.3                                           | 15.8                    | 16.0                                          | 15.7                                                     | 15.7                                           |
| <i>acpT</i> | 14.8                    | 14.7                                          | 14.5                                                     | 14.0                                           | 14.8                    | 15.1                                          | 14.9                                                     | 14.9                                           |
| <i>acrA</i> | 16.9                    | 16.9                                          | 16.7                                                     | 16.9                                           | 16.8                    | 16.9                                          | 16.8                                                     | 16.7                                           |
| <i>acrB</i> | 16.2                    | 16.2                                          | 16.1                                                     | 16.2                                           | 16.2                    | 16.3                                          | 16.2                                                     | 16.1                                           |
| <i>acrD</i> | 13.1                    | 13.2                                          | 13.2                                                     | 13.0                                           | 13.4                    | 13.5                                          | 13.4                                                     | 13.4                                           |
| <i>acrE</i> | 12.7                    | 12.7                                          | 12.5                                                     | 13.0                                           | 12.8                    | 12.6                                          | 12.6                                                     | 12.5                                           |
| <i>acrF</i> | 12.9                    | 12.9                                          | 12.8                                                     | 13.1                                           | 13.0                    | 13.0                                          | 12.9                                                     | 12.8                                           |
| <i>acrR</i> | 14.4                    | 14.3                                          | 14.0                                                     | 13.9                                           | 13.7                    | 14.3                                          | 13.5                                                     | 13.7                                           |
| <i>acs</i>  | 15.4                    | 14.8                                          | 15.7                                                     | 15.4                                           | 13.0                    | 12.8                                          | 12.9                                                     | 12.8                                           |
| <i>actP</i> | 13.7                    | 13.3                                          | 14.1                                                     | 13.5                                           | 12.8                    | 12.7                                          | 12.8                                                     | 12.7                                           |
| <i>ada</i>  | 13.5                    | 13.6                                          | 13.4                                                     | 13.6                                           | 13.5                    | 13.6                                          | 13.6                                                     | 13.5                                           |
| <i>add</i>  | 14.8                    | 14.7                                          | 14.6                                                     | 14.2                                           | 14.2                    | 14.5                                          | 14.1                                                     | 14.2                                           |
| <i>ade</i>  | 13.6                    | 13.4                                          | 13.5                                                     | 13.3                                           | 13.1                    | 13.3                                          | 13.2                                                     | 13.1                                           |
| <i>adhE</i> | 18.1                    | 18.2                                          | 17.9                                                     | 18.3                                           | 19.7                    | 19.7                                          | 20.0                                                     | 19.8                                           |
| <i>adhP</i> | 15.7                    | 16.1                                          | 15.7                                                     | 15.6                                           | 14.0                    | 15.0                                          | 14.4                                                     | 14.0                                           |
| <i>adiA</i> | 13.0                    | 13.0                                          | 12.8                                                     | 13.1                                           | 13.4                    | 13.3                                          | 13.3                                                     | 13.6                                           |
| <i>adiC</i> | 12.7                    | 12.7                                          | 12.7                                                     | 12.9                                           | 14.4                    | 14.0                                          | 14.7                                                     | 15.0                                           |
| <i>adiY</i> | 13.0                    | 13.3                                          | 12.9                                                     | 12.8                                           | 15.2                    | 16.4                                          | 16.0                                                     | 15.2                                           |
| <i>adk</i>  | 18.5                    | 18.3                                          | 18.3                                                     | 18.4                                           | 18.9                    | 18.6                                          | 18.7                                                     | 18.7                                           |
| <i>adrA</i> | 12.9                    | 12.9                                          | 12.8                                                     | 13.1                                           | 13.0                    | 12.9                                          | 13.0                                                     | 12.7                                           |
| <i>aegA</i> | 12.9                    | 12.9                                          | 12.8                                                     | 13.0                                           | 13.8                    | 13.5                                          | 13.8                                                     | 13.8                                           |
| <i>aer</i>  | 13.4                    | 13.4                                          | 13.3                                                     | 13.5                                           | 13.6                    | 13.1                                          | 13.2                                                     | 13.0                                           |
| <i>aes</i>  | 12.9                    | 12.9                                          | 12.9                                                     | 13.3                                           | 12.9                    | 13.0                                          | 12.9                                                     | 12.9                                           |
| <i>afuB</i> | 13.0                    | 13.0                                          | 13.0                                                     | 13.3                                           | 13.1                    | 13.0                                          | 13.1                                                     | 13.0                                           |
| <i>afuC</i> | 12.8                    | 12.8                                          | 12.7                                                     | 13.0                                           | 13.0                    | 12.9                                          | 12.9                                                     | 12.8                                           |
| <i>agaA</i> | 13.1                    | 13.0                                          | 12.9                                                     | 13.0                                           | 13.0                    | 13.0                                          | 13.0                                                     | 12.7                                           |
| <i>agaB</i> | 12.8                    | 12.9                                          | 12.7                                                     | 12.8                                           | 12.8                    | 13.0                                          | 12.8                                                     | 12.7                                           |
| <i>agaC</i> | 12.7                    | 12.8                                          | 12.6                                                     | 12.7                                           | 13.1                    | 12.7                                          | 12.7                                                     | 12.6                                           |
| <i>agaD</i> | 12.8                    | 12.8                                          | 12.7                                                     | 12.9                                           | 12.8                    | 12.9                                          | 12.7                                                     | 12.6                                           |
| <i>agaI</i> | 13.0                    | 13.0                                          | 12.8                                                     | 13.0                                           | 13.1                    | 12.9                                          | 12.9                                                     | 12.7                                           |
| <i>agaR</i> | 15.1                    | 15.1                                          | 14.7                                                     | 14.8                                           | 15.3                    | 15.5                                          | 15.1                                                     | 15.5                                           |
| <i>agaS</i> | 12.8                    | 12.7                                          | 12.6                                                     | 12.7                                           | 12.7                    | 12.6                                          | 12.7                                                     | 12.6                                           |
| <i>agaV</i> | 13.2                    | 13.1                                          | 13.0                                                     | 13.1                                           | 13.0                    | 13.0                                          | 13.7                                                     | 13.0                                           |

|             |      |      |      |      |      |      |      |      |
|-------------|------|------|------|------|------|------|------|------|
| <i>agaW</i> | 12.8 | 12.8 | 12.8 | 13.5 | 12.9 | 12.8 | 13.6 | 12.7 |
| <i>agp</i>  | 14.8 | 14.7 | 14.7 | 14.8 | 14.4 | 14.5 | 14.4 | 14.4 |
| <i>ahpC</i> | 19.4 | 19.5 | 19.6 | 19.3 | 19.0 | 18.8 | 19.0 | 19.0 |
| <i>ahpF</i> | 16.9 | 17.2 | 16.9 | 16.9 | 16.7 | 16.8 | 16.8 | 16.9 |
| <i>aidB</i> | 14.5 | 14.5 | 14.2 | 14.3 | 15.6 | 14.7 | 15.0 | 15.8 |
| <i>ais</i>  | 16.5 | 16.2 | 16.3 | 16.5 | 15.5 | 13.8 | 13.6 | 16.2 |
| <i>alaA</i> | 15.6 | 16.2 | 15.5 | 15.4 | 15.5 | 15.7 | 15.3 | 15.4 |
| <i>alaC</i> | 15.6 | 15.7 | 15.5 | 15.3 | 15.3 | 15.7 | 15.4 | 15.4 |
| <i>alaS</i> | 17.7 | 17.5 | 17.4 | 17.6 | 17.8 | 17.6 | 17.7 | 17.8 |
| <i>alaT</i> | 18.4 | 18.4 | 18.0 | 17.9 | 18.7 | 18.4 | 17.7 | 18.2 |
| <i>alaU</i> | 18.4 | 18.4 | 18.1 | 17.8 | 18.7 | 18.3 | 17.8 | 18.4 |
| <i>alaV</i> | 17.5 | 17.3 | 17.7 | 16.4 | 18.6 | 17.5 | 17.6 | 17.1 |
| <i>alaW</i> | 18.4 | 18.4 | 17.8 | 17.8 | 17.9 | 18.1 | 16.5 | 18.0 |
| <i>alaX</i> | 17.6 | 17.8 | 18.0 | 17.0 | 17.6 | 17.8 | 16.7 | 17.5 |
| <i>aldA</i> | 16.9 | 16.5 | 17.1 | 17.0 | 13.5 | 13.5 | 13.4 | 13.7 |
| <i>aldB</i> | 13.5 | 13.6 | 13.4 | 13.3 | 13.4 | 13.4 | 13.3 | 13.2 |
| <i>alkA</i> | 13.7 | 13.8 | 13.6 | 13.9 | 13.9 | 13.9 | 13.8 | 13.8 |
| <i>alkB</i> | 13.4 | 13.3 | 13.3 | 13.4 | 13.3 | 13.5 | 13.4 | 13.5 |
| <i>allA</i> | 13.2 | 13.3 | 13.1 | 13.5 | 13.4 | 13.4 | 13.5 | 13.4 |
| <i>allB</i> | 12.9 | 13.0 | 12.8 | 12.9 | 13.1 | 12.9 | 13.0 | 12.8 |
| <i>allC</i> | 13.6 | 13.6 | 13.4 | 13.7 | 13.7 | 13.9 | 13.5 | 13.4 |
| <i>allD</i> | 12.7 | 12.7 | 12.7 | 12.9 | 12.7 | 12.7 | 12.7 | 12.5 |
| <i>allE</i> | 14.8 | 14.8 | 14.4 | 14.6 | 14.8 | 15.2 | 14.6 | 14.7 |
| <i>allR</i> | 16.4 | 16.4 | 16.4 | 16.3 | 16.5 | 16.4 | 16.3 | 16.8 |
| <i>allS</i> | 12.9 | 13.0 | 12.7 | 13.1 | 13.0 | 13.0 | 13.0 | 13.3 |
| <i>alpA</i> | 13.6 | 13.4 | 13.3 | 13.5 | 13.5 | 13.5 | 13.3 | 13.3 |
| <i>alr</i>  | 15.0 | 15.0 | 14.7 | 14.8 | 14.8 | 15.1 | 14.9 | 15.1 |
| <i>alsA</i> | 12.8 | 12.7 | 12.6 | 13.0 | 12.8 | 12.8 | 12.7 | 12.8 |
| <i>alsB</i> | 13.6 | 13.4 | 13.3 | 13.7 | 13.4 | 13.4 | 13.4 | 13.3 |
| <i>alsC</i> | 12.7 | 12.7 | 12.6 | 12.8 | 12.8 | 12.8 | 12.8 | 12.7 |
| <i>alsE</i> | 13.1 | 13.1 | 13.0 | 13.2 | 13.0 | 13.1 | 13.1 | 13.0 |
| <i>alsK</i> | 13.0 | 13.1 | 12.9 | 13.3 | 13.2 | 13.1 | 13.1 | 13.0 |
| <i>alx</i>  | 13.6 | 13.4 | 13.5 | 13.3 | 13.1 | 13.4 | 13.9 | 12.9 |
| <i>amiA</i> | 15.8 | 15.6 | 15.4 | 15.6 | 15.0 | 15.6 | 15.3 | 15.3 |
| <i>amiB</i> | 14.8 | 14.8 | 14.5 | 14.6 | 14.7 | 14.8 | 14.6 | 15.0 |
| <i>amiC</i> | 14.6 | 14.6 | 14.5 | 14.2 | 14.9 | 15.1 | 14.9 | 14.8 |
| <i>amiD</i> | 15.0 | 15.1 | 14.9 | 15.0 | 15.0 | 15.2 | 15.2 | 15.3 |
| <i>amn</i>  | 16.8 | 16.9 | 16.7 | 16.8 | 16.1 | 16.7 | 16.1 | 16.1 |
| <i>ampC</i> | 14.6 | 14.4 | 14.3 | 14.3 | 14.1 | 14.3 | 14.2 | 14.2 |
| <i>ampD</i> | 15.0 | 15.0 | 14.9 | 14.4 | 15.2 | 15.2 | 15.0 | 14.9 |
| <i>ampE</i> | 14.6 | 14.6 | 14.3 | 14.4 | 14.5 | 14.8 | 14.5 | 14.6 |
| <i>ampG</i> | 14.9 | 14.8 | 14.9 | 14.5 | 14.3 | 14.5 | 14.3 | 14.3 |
| <i>ampH</i> | 14.5 | 14.6 | 14.6 | 14.1 | 14.5 | 14.8 | 14.6 | 14.7 |
| <i>amtB</i> | 14.2 | 14.0 | 13.9 | 14.0 | 13.6 | 13.7 | 13.6 | 13.4 |
| <i>amyA</i> | 15.6 | 15.6 | 15.1 | 15.6 | 15.3 | 15.0 | 14.7 | 15.2 |
| <i>anmK</i> | 14.4 | 14.4 | 14.3 | 14.2 | 14.6 | 14.6 | 14.5 | 14.6 |
| <i>ansA</i> | 16.1 | 16.0 | 15.8 | 15.9 | 15.8 | 15.9 | 15.7 | 15.7 |
| <i>ansB</i> | 13.4 | 13.3 | 13.2 | 13.2 | 15.4 | 15.1 | 15.6 | 15.3 |
| <i>ansP</i> | 13.7 | 13.1 | 13.3 | 13.3 | 13.3 | 13.0 | 13.1 | 13.4 |
| <i>apaG</i> | 16.3 | 16.3 | 15.9 | 15.9 | 16.3 | 16.5 | 16.1 | 16.2 |
| <i>apaH</i> | 15.0 | 15.1 | 14.8 | 14.9 | 14.8 | 15.1 | 14.9 | 15.0 |
| <i>apbE</i> | 13.7 | 13.7 | 13.7 | 13.6 | 13.7 | 13.9 | 14.1 | 14.1 |
| <i>aphA</i> | 14.1 | 14.1 | 13.8 | 13.9 | 13.9 | 14.5 | 14.0 | 14.0 |
| <i>appA</i> | 13.7 | 13.8 | 13.5 | 13.4 | 16.8 | 15.3 | 16.4 | 17.1 |
| <i>appB</i> | 13.5 | 13.6 | 13.4 | 13.3 | 17.7 | 15.8 | 17.3 | 18.1 |
| <i>appC</i> | 13.6 | 13.7 | 13.5 | 13.3 | 18.0 | 16.0 | 17.7 | 18.2 |
| <i>appY</i> | 14.4 | 14.5 | 13.8 | 13.7 | 16.6 | 15.6 | 15.6 | 16.3 |
| <i>apt</i>  | 17.0 | 17.3 | 17.3 | 16.7 | 16.9 | 17.2 | 17.2 | 16.9 |
| <i>aqpZ</i> | 13.4 | 13.5 | 13.4 | 13.2 | 13.6 | 13.7 | 13.8 | 13.8 |
| <i>araA</i> | 13.1 | 13.0 | 13.0 | 13.0 | 13.0 | 13.0 | 13.0 | 13.2 |
| <i>araB</i> | 12.8 | 12.8 | 12.8 | 12.9 | 12.8 | 12.8 | 12.8 | 12.6 |

|               |      |      |      |      |      |      |      |      |
|---------------|------|------|------|------|------|------|------|------|
| <i>araC</i>   | 14.5 | 14.5 | 14.4 | 14.1 | 14.1 | 14.5 | 14.1 | 14.1 |
| <i>araD</i>   | 12.9 | 12.9 | 12.9 | 13.0 | 12.9 | 13.0 | 12.9 | 12.7 |
| <i>araE</i>   | 13.6 | 13.5 | 13.4 | 13.5 | 13.6 | 13.6 | 13.5 | 13.5 |
| <i>araF</i>   | 13.0 | 12.9 | 12.9 | 13.4 | 13.0 | 13.0 | 12.9 | 12.8 |
| <i>araG</i>   | 12.9 | 12.9 | 12.8 | 13.2 | 13.0 | 12.9 | 12.9 | 12.8 |
| <i>araH</i>   | 13.2 | 13.2 | 13.1 | 13.3 | 13.3 | 13.4 | 13.3 | 13.1 |
| <i>araJ</i>   | 13.9 | 14.0 | 13.6 | 13.4 | 13.6 | 14.1 | 13.5 | 13.8 |
| <i>arcA</i>   | 18.0 | 17.8 | 17.4 | 17.9 | 18.3 | 18.2 | 18.4 | 18.6 |
| <i>arcB</i>   | 15.0 | 15.2 | 14.7 | 14.8 | 15.2 | 15.6 | 15.0 | 15.1 |
| <i>arcZ</i>   | 14.4 | 14.5 | 14.3 | 13.6 | 13.7 | 14.3 | 13.5 | 14.0 |
| <i>arfA</i>   | 16.1 | 16.3 | 15.1 | 15.6 | 15.7 | 16.4 | 14.6 | 15.4 |
| <i>argA</i>   | 16.7 | 16.8 | 16.8 | 16.6 | 16.7 | 17.0 | 16.8 | 16.6 |
| <i>argB</i>   | 17.3 | 17.2 | 17.3 | 17.4 | 17.5 | 17.1 | 17.4 | 17.2 |
| <i>argC</i>   | 17.5 | 17.3 | 17.3 | 17.3 | 17.2 | 17.5 | 17.3 | 17.2 |
| <i>argD</i>   | 17.5 | 17.5 | 17.4 | 17.5 | 17.9 | 17.7 | 17.8 | 17.7 |
| <i>argE</i>   | 16.8 | 16.9 | 16.8 | 16.7 | 15.7 | 16.2 | 15.9 | 15.9 |
| <i>argF</i>   | 17.0 | 16.7 | 17.4 | 16.8 | 17.0 | 16.8 | 17.1 | 16.5 |
| <i>argG</i>   | 18.3 | 18.2 | 18.3 | 18.5 | 18.1 | 18.3 | 18.4 | 18.1 |
| <i>argH</i>   | 17.0 | 17.0 | 17.2 | 17.1 | 16.9 | 16.9 | 17.0 | 16.7 |
| <i>argI</i>   | 17.2 | 17.0 | 17.1 | 17.2 | 17.0 | 17.2 | 17.2 | 17.1 |
| <i>argK</i>   | 12.9 | 12.8 | 12.7 | 12.9 | 12.8 | 12.9 | 12.8 | 12.8 |
| <i>argO</i>   | 14.6 | 14.6 | 14.2 | 14.1 | 14.4 | 14.6 | 14.2 | 14.7 |
| <i>argP</i>   | 15.5 | 15.4 | 15.4 | 15.1 | 15.5 | 15.8 | 15.6 | 15.7 |
| <i>argQ</i>   | 18.6 | 18.4 | 18.1 | 18.3 | 18.7 | 18.4 | 18.0 | 18.3 |
| <i>argR</i>   | 16.5 | 16.5 | 15.9 | 15.8 | 15.9 | 16.3 | 15.8 | 16.2 |
| <i>argS</i>   | 16.4 | 16.3 | 16.2 | 16.3 | 16.3 | 16.3 | 16.1 | 16.3 |
| <i>argT</i>   | 16.7 | 16.5 | 16.4 | 16.5 | 13.2 | 13.9 | 13.3 | 13.6 |
| <i>argU</i>   | 17.1 | 17.0 | 16.4 | 15.9 | 16.6 | 17.5 | 15.4 | 16.3 |
| <i>argV</i>   | 18.3 | 18.3 | 18.4 | 17.9 | 19.1 | 18.4 | 18.3 | 18.4 |
| <i>argW</i>   | 14.1 | 14.4 | 14.0 | 13.5 | 14.3 | 14.2 | 13.6 | 13.6 |
| <i>argX</i>   | 15.7 | 16.2 | 16.9 | 15.1 | 17.0 | 15.7 | 16.1 | 15.8 |
| <i>argY</i>   | 19.4 | 19.3 | 18.6 | 19.7 | 19.4 | 19.3 | 18.9 | 19.8 |
| <i>argZ</i>   | 18.9 | 18.6 | 18.1 | 18.3 | 18.6 | 18.8 | 18.2 | 18.9 |
| <i>ariR</i>   | 13.8 | 13.8 | 13.5 | 13.4 | 12.9 | 12.9 | 12.7 | 12.7 |
| <i>arnA</i>   | 17.0 | 16.3 | 17.1 | 16.9 | 16.4 | 14.1 | 14.4 | 17.0 |
| <i>arnB</i>   | 17.8 | 16.9 | 17.9 | 17.4 | 17.2 | 14.6 | 15.0 | 17.7 |
| <i>arnC</i>   | 17.7 | 16.9 | 17.7 | 17.6 | 17.0 | 14.4 | 14.8 | 17.4 |
| <i>arnD</i>   | 15.6 | 15.2 | 15.6 | 15.5 | 15.1 | 13.5 | 13.8 | 16.0 |
| <i>arnE</i>   | 14.2 | 14.0 | 14.2 | 13.8 | 13.9 | 13.5 | 13.6 | 14.4 |
| <i>arnF</i>   | 13.9 | 13.6 | 13.7 | 13.4 | 13.3 | 13.2 | 13.1 | 13.6 |
| <i>arnT</i>   | 14.2 | 13.8 | 14.2 | 13.6 | 13.6 | 13.2 | 13.1 | 13.9 |
| <i>aroA</i>   | 17.7 | 17.7 | 17.4 | 17.7 | 18.0 | 17.7 | 17.8 | 17.8 |
| <i>aroB</i>   | 17.1 | 17.0 | 17.2 | 17.1 | 17.5 | 17.2 | 17.3 | 17.2 |
| <i>aroC</i>   | 16.7 | 16.6 | 16.6 | 16.6 | 16.4 | 16.6 | 16.6 | 16.5 |
| <i>aroD</i>   | 15.8 | 15.8 | 15.4 | 15.4 | 15.7 | 16.1 | 15.6 | 15.8 |
| <i>aroE</i>   | 15.9 | 15.8 | 15.4 | 15.9 | 15.5 | 15.5 | 15.2 | 15.4 |
| <i>aroF</i>   | 17.3 | 17.3 | 17.2 | 17.2 | 17.4 | 16.6 | 16.7 | 17.4 |
| <i>aroG</i>   | 18.7 | 18.6 | 18.4 | 18.7 | 18.8 | 18.5 | 18.5 | 18.7 |
| <i>aroH</i>   | 16.3 | 16.2 | 16.2 | 16.2 | 16.2 | 15.9 | 16.1 | 16.5 |
| <i>aroK</i>   | 18.0 | 17.9 | 17.8 | 17.9 | 18.1 | 18.1 | 17.9 | 18.1 |
| <i>aroL</i>   | 16.4 | 16.4 | 16.3 | 16.3 | 16.9 | 16.6 | 16.6 | 16.8 |
| <i>aroM</i>   | 14.7 | 14.6 | 14.3 | 14.4 | 14.3 | 14.4 | 14.0 | 14.2 |
| <i>aroP</i>   | 17.5 | 17.4 | 17.5 | 17.7 | 17.6 | 17.0 | 17.5 | 17.7 |
| <i>arpA</i>   | 12.7 | 12.7 | 12.5 | 12.8 | 12.7 | 12.7 | 12.5 | 12.5 |
| <i>arpB_1</i> | 12.9 | 13.0 | 12.7 | 13.0 | 13.0 | 12.9 | 12.7 | 12.7 |
| <i>arpB_2</i> | 12.5 | 12.6 | 12.4 | 12.8 | 12.6 | 12.6 | 12.4 | 12.4 |
| <i>arsB</i>   | 13.2 | 13.2 | 13.3 | 12.9 | 13.1 | 13.2 | 13.2 | 13.1 |
| <i>arsC</i>   | 14.1 | 14.1 | 13.9 | 13.6 | 13.9 | 13.9 | 13.8 | 13.8 |
| <i>arsR</i>   | 13.4 | 13.5 | 13.3 | 13.1 | 13.2 | 13.3 | 13.1 | 13.2 |
| <i>artI</i>   | 17.2 | 17.1 | 16.8 | 17.1 | 17.4 | 17.6 | 17.6 | 17.4 |
| <i>artJ</i>   | 19.0 | 18.7 | 18.5 | 18.7 | 18.5 | 19.0 | 18.5 | 18.4 |

|              |      |      |      |      |      |      |      |      |
|--------------|------|------|------|------|------|------|------|------|
| <i>artM</i>  | 15.2 | 15.1 | 15.1 | 15.2 | 15.5 | 15.8 | 15.8 | 15.8 |
| <i>artP</i>  | 17.0 | 16.9 | 16.7 | 16.9 | 17.3 | 17.6 | 17.4 | 17.4 |
| <i>artQ</i>  | 15.4 | 15.3 | 15.4 | 15.6 | 15.8 | 15.9 | 16.1 | 16.0 |
| <i>ascB</i>  | 13.4 | 13.4 | 13.2 | 13.3 | 13.4 | 13.4 | 13.3 | 13.2 |
| <i>ascF</i>  | 13.0 | 12.9 | 13.0 | 13.1 | 13.1 | 13.1 | 13.1 | 13.0 |
| <i>ascG</i>  | 14.8 | 14.7 | 14.6 | 14.3 | 14.6 | 14.9 | 14.5 | 14.4 |
| <i>asd</i>   | 18.7 | 18.7 | 18.9 | 18.7 | 19.0 | 18.6 | 19.0 | 18.9 |
| <i>aslA</i>  | 13.0 | 12.9 | 12.9 | 13.5 | 13.0 | 13.0 | 13.0 | 12.8 |
| <i>aslB</i>  | 13.0 | 12.9 | 12.9 | 13.0 | 12.9 | 13.0 | 12.9 | 12.9 |
| <i>asmA</i>  | 14.8 | 14.9 | 14.6 | 14.7 | 15.0 | 15.2 | 14.9 | 15.0 |
| <i>asnA</i>  | 15.0 | 15.1 | 14.9 | 14.7 | 14.8 | 15.0 | 14.6 | 14.8 |
| <i>asnB</i>  | 16.2 | 16.4 | 16.1 | 16.3 | 16.4 | 16.8 | 16.6 | 16.5 |
| <i>asnC</i>  | 14.4 | 14.4 | 14.0 | 13.9 | 14.3 | 14.4 | 14.3 | 14.5 |
| <i>asnS</i>  | 17.3 | 17.2 | 17.3 | 17.3 | 17.4 | 17.2 | 17.4 | 17.5 |
| <i>asnT</i>  | 18.7 | 18.9 | 18.4 | 17.1 | 18.6 | 18.9 | 17.4 | 17.8 |
| <i>asnU</i>  | 18.6 | 18.7 | 18.2 | 17.5 | 19.0 | 18.5 | 17.5 | 17.4 |
| <i>asnV</i>  | 18.7 | 18.4 | 18.1 | 16.7 | 18.3 | 18.4 | 16.8 | 17.1 |
| <i>asnW</i>  | 19.1 | 19.0 | 18.6 | 17.4 | 19.1 | 18.9 | 17.7 | 18.2 |
| <i>aspA</i>  | 14.9 | 14.9 | 14.5 | 14.4 | 15.6 | 16.0 | 15.9 | 15.8 |
| <i>aspC</i>  | 18.5 | 18.5 | 18.6 | 18.5 | 18.0 | 18.3 | 18.4 | 18.4 |
| <i>aspS</i>  | 17.3 | 17.2 | 17.1 | 17.4 | 17.5 | 17.5 | 17.6 | 17.6 |
| <i>aspT</i>  | 18.1 | 17.9 | 18.7 | 17.6 | 18.6 | 18.1 | 18.0 | 18.1 |
| <i>aspU</i>  | 19.1 | 19.0 | 18.9 | 18.2 | 19.1 | 19.0 | 18.2 | 18.7 |
| <i>aspV</i>  | 16.5 | 16.5 | 17.1 | 16.0 | 17.3 | 16.4 | 16.4 | 15.7 |
| <i>asr</i>   | 14.1 | 14.2 | 13.6 | 13.7 | 13.6 | 14.4 | 13.6 | 13.7 |
| <i>astA</i>  | 13.3 | 13.2 | 13.2 | 13.8 | 12.9 | 12.7 | 12.8 | 12.6 |
| <i>astB</i>  | 12.9 | 12.9 | 12.9 | 13.0 | 13.0 | 12.8 | 12.9 | 12.8 |
| <i>astC</i>  | 13.6 | 13.5 | 13.4 | 13.4 | 12.9 | 12.7 | 12.8 | 12.6 |
| <i>astD</i>  | 12.9 | 12.9 | 12.9 | 13.1 | 12.9 | 12.7 | 12.8 | 12.6 |
| <i>astE</i>  | 13.0 | 12.9 | 12.9 | 13.2 | 13.1 | 12.8 | 12.9 | 12.7 |
| <i>atl</i>   | 13.8 | 14.0 | 14.0 | 14.5 | 14.4 | 14.3 | 14.2 | 13.9 |
| <i>atoA</i>  | 12.8 | 12.9 | 12.7 | 13.9 | 13.2 | 12.8 | 12.9 | 12.6 |
| <i>atoB</i>  | 13.0 | 13.0 | 12.8 | 13.0 | 13.1 | 13.2 | 13.0 | 12.8 |
| <i>atoC</i>  | 13.7 | 13.6 | 13.4 | 13.4 | 13.3 | 13.7 | 13.4 | 13.4 |
| <i>atoD</i>  | 12.7 | 12.7 | 12.6 | 13.8 | 12.9 | 12.7 | 12.7 | 12.6 |
| <i>atoE</i>  | 12.6 | 12.7 | 12.6 | 12.9 | 12.7 | 12.6 | 12.6 | 12.6 |
| <i>atoS</i>  | 13.2 | 13.1 | 13.0 | 13.2 | 13.0 | 13.3 | 13.0 | 13.0 |
| <i>atpA</i>  | 18.8 | 18.7 | 19.1 | 19.0 | 18.7 | 18.6 | 19.1 | 18.8 |
| <i>atpB</i>  | 19.0 | 19.0 | 19.0 | 19.0 | 19.2 | 18.9 | 19.1 | 19.2 |
| <i>atpC</i>  | 17.6 | 17.7 | 17.9 | 17.7 | 17.5 | 17.6 | 17.7 | 17.7 |
| <i>atpD</i>  | 18.3 | 18.3 | 19.0 | 18.6 | 18.5 | 18.1 | 18.8 | 18.5 |
| <i>atpE</i>  | 19.6 | 19.5 | 19.8 | 19.8 | 19.7 | 19.3 | 19.7 | 19.6 |
| <i>atpF</i>  | 19.4 | 19.3 | 19.6 | 19.5 | 19.5 | 19.3 | 19.5 | 19.4 |
| <i>atpG</i>  | 19.0 | 19.0 | 19.2 | 19.1 | 18.9 | 18.9 | 19.1 | 18.9 |
| <i>atpH</i>  | 19.2 | 19.2 | 19.5 | 19.4 | 19.4 | 19.1 | 19.5 | 19.3 |
| <i>atpI</i>  | 18.5 | 18.5 | 18.5 | 18.3 | 18.6 | 18.6 | 18.3 | 18.5 |
| <i>avtA</i>  | 17.2 | 17.1 | 16.9 | 17.1 | 16.6 | 17.0 | 16.8 | 16.9 |
| <i>azoR</i>  | 15.5 | 15.2 | 15.3 | 15.1 | 14.8 | 15.0 | 14.9 | 15.2 |
| <i>azuC</i>  | 18.4 | 18.5 | 16.8 | 17.2 | 14.9 | 16.5 | 14.0 | 15.1 |
| <i>b0100</i> | 15.9 | 16.0 | 15.3 | 15.8 | 15.3 | 16.0 | 15.1 | 15.6 |
| <i>b0105</i> | 13.2 | 13.2 | 13.2 | 12.9 | 13.2 | 13.3 | 13.2 | 13.5 |
| <i>b0165</i> | 15.8 | 15.7 | 15.3 | 15.2 | 15.0 | 15.8 | 15.1 | 15.1 |
| <i>b0309</i> | 12.8 | 12.8 | 12.6 | 13.0 | 12.8 | 12.8 | 12.5 | 12.7 |
| <i>b0701</i> | 13.5 | 13.4 | 13.3 | 13.5 | 13.5 | 13.7 | 13.4 | 13.3 |
| <i>b0725</i> | 17.7 | 17.2 | 17.7 | 17.4 | 14.7 | 15.4 | 14.8 | 15.0 |
| <i>b1052</i> | 15.9 | 15.9 | 16.2 | 16.2 | 16.5 | 15.8 | 15.6 | 15.0 |
| <i>b1364</i> | 13.7 | 13.5 | 13.4 | 13.5 | 13.3 | 13.9 | 13.4 | 13.3 |
| <i>b2191</i> | 14.4 | 14.5 | 14.4 | 15.1 | 14.5 | 14.0 | 14.2 | 14.5 |
| <i>b2651</i> | 12.9 | 12.8 | 12.8 | 13.0 | 13.1 | 12.8 | 12.8 | 12.9 |
| <i>b3254</i> | 13.6 | 13.5 | 13.5 | 14.9 | 13.5 | 13.6 | 13.4 | 13.8 |
| <i>b4247</i> | 12.9 | 12.8 | 12.8 | 12.8 | 13.0 | 12.8 | 12.9 | 12.7 |

|              |      |      |      |      |      |      |      |      |
|--------------|------|------|------|------|------|------|------|------|
| <i>bacA</i>  | 15.0 | 14.9 | 15.0 | 15.1 | 14.9 | 14.9 | 14.9 | 15.2 |
| <i>baeR</i>  | 15.3 | 15.5 | 15.1 | 14.8 | 15.2 | 15.7 | 15.2 | 15.3 |
| <i>baeS</i>  | 13.6 | 13.8 | 13.5 | 13.3 | 13.5 | 13.7 | 13.5 | 13.5 |
| <i>bamA</i>  | 17.5 | 17.5 | 17.3 | 17.5 | 17.6 | 17.5 | 17.5 | 17.5 |
| <i>bamB</i>  | 16.7 | 16.6 | 16.5 | 16.6 | 16.7 | 16.5 | 16.5 | 16.7 |
| <i>bamC</i>  | 17.0 | 17.1 | 17.0 | 17.0 | 17.1 | 17.0 | 17.2 | 17.2 |
| <i>bamD</i>  | 17.8 | 17.9 | 17.6 | 17.9 | 17.7 | 17.9 | 17.8 | 17.7 |
| <i>barA</i>  | 14.4 | 14.4 | 13.9 | 14.0 | 14.1 | 14.7 | 14.1 | 14.3 |
| <i>basR</i>  | 16.5 | 16.1 | 16.1 | 16.7 | 15.8 | 14.7 | 14.4 | 16.0 |
| <i>basS</i>  | 15.7 | 15.3 | 15.4 | 15.6 | 15.0 | 14.2 | 14.0 | 15.3 |
| <i>bax</i>   | 16.1 | 15.8 | 15.6 | 15.7 | 15.5 | 16.0 | 15.2 | 15.5 |
| <i>bcp</i>   | 18.6 | 18.6 | 18.5 | 18.4 | 18.3 | 18.5 | 18.1 | 18.3 |
| <i>bcr</i>   | 15.0 | 15.0 | 14.7 | 14.7 | 14.9 | 15.2 | 15.1 | 15.3 |
| <i>bcsA</i>  | 12.8 | 12.9 | 12.8 | 13.0 | 12.7 | 12.7 | 12.7 | 12.6 |
| <i>bcsB</i>  | 13.3 | 13.3 | 13.2 | 13.2 | 13.1 | 13.0 | 13.0 | 12.9 |
| <i>bcsC</i>  | 13.5 | 13.6 | 13.4 | 13.3 | 13.5 | 13.4 | 13.4 | 13.3 |
| <i>bcsE</i>  | 15.7 | 15.6 | 15.4 | 15.4 | 14.7 | 15.0 | 14.5 | 14.7 |
| <i>bcsF</i>  | 15.8 | 15.8 | 15.7 | 15.7 | 14.5 | 15.3 | 14.7 | 14.9 |
| <i>bcsG</i>  | 14.9 | 14.8 | 14.7 | 14.6 | 13.8 | 14.1 | 13.8 | 13.9 |
| <i>bcsQ</i>  | 14.1 | 14.0 | 13.8 | 13.7 | 13.4 | 13.5 | 13.3 | 13.2 |
| <i>bcsZ</i>  | 13.2 | 13.2 | 13.1 | 13.7 | 13.1 | 13.0 | 13.1 | 12.9 |
| <i>bdm</i>   | 15.2 | 14.7 | 14.4 | 14.7 | 13.5 | 13.9 | 13.4 | 13.2 |
| <i>betA</i>  | 14.0 | 13.9 | 13.9 | 14.1 | 13.1 | 12.9 | 13.0 | 12.8 |
| <i>betB</i>  | 14.8 | 14.8 | 14.6 | 14.6 | 13.8 | 13.6 | 13.4 | 13.1 |
| <i>betI</i>  | 15.2 | 15.1 | 15.0 | 14.9 | 13.2 | 13.3 | 13.1 | 13.1 |
| <i>befT</i>  | 13.9 | 13.8 | 13.8 | 13.6 | 12.9 | 12.8 | 12.8 | 12.7 |
| <i>bfd</i>   | 15.9 | 18.2 | 17.5 | 14.4 | 13.3 | 18.4 | 17.3 | 13.4 |
| <i>bfr</i>   | 17.9 | 16.5 | 16.9 | 17.9 | 17.6 | 16.6 | 16.5 | 17.8 |
| <i>bglA</i>  | 16.2 | 16.3 | 16.0 | 16.2 | 16.3 | 16.3 | 16.1 | 16.1 |
| <i>bglB</i>  | 12.9 | 13.0 | 12.8 | 13.6 | 13.1 | 12.9 | 12.8 | 12.7 |
| <i>bglF</i>  | 12.7 | 12.7 | 12.6 | 13.2 | 12.8 | 12.7 | 12.6 | 12.6 |
| <i>bglG</i>  | 12.7 | 12.7 | 12.5 | 13.2 | 12.7 | 12.8 | 12.6 | 12.5 |
| <i>bglH</i>  | 12.7 | 12.7 | 12.6 | 13.0 | 12.8 | 12.8 | 12.6 | 12.6 |
| <i>bglJ</i>  | 12.8 | 12.8 | 12.7 | 13.1 | 12.8 | 12.9 | 12.7 | 12.8 |
| <i>bglX</i>  | 15.2 | 15.1 | 15.0 | 15.0 | 15.3 | 15.2 | 15.3 | 15.2 |
| <i>bhsA</i>  | 16.3 | 17.1 | 15.7 | 15.3 | 14.2 | 15.1 | 13.9 | 14.3 |
| <i>bioA</i>  | 15.0 | 16.4 | 15.0 | 14.7 | 14.2 | 15.5 | 14.3 | 14.2 |
| <i>bioB</i>  | 16.7 | 17.0 | 16.6 | 16.6 | 15.6 | 16.3 | 15.7 | 15.5 |
| <i>bioC</i>  | 15.5 | 15.8 | 15.3 | 15.1 | 14.4 | 14.9 | 14.6 | 14.6 |
| <i>bioD</i>  | 15.7 | 16.0 | 15.6 | 15.7 | 14.9 | 14.9 | 15.0 | 14.9 |
| <i>bioF</i>  | 15.4 | 15.7 | 15.2 | 15.2 | 14.4 | 14.9 | 14.4 | 14.4 |
| <i>bioH</i>  | 14.1 | 14.1 | 14.1 | 13.9 | 14.0 | 13.9 | 13.9 | 13.9 |
| <i>birA</i>  | 14.7 | 14.7 | 14.4 | 14.5 | 14.7 | 14.6 | 14.4 | 14.5 |
| <i>bisC</i>  | 14.8 | 14.7 | 14.5 | 14.6 | 14.8 | 14.7 | 14.6 | 14.9 |
| <i>blc</i>   | 15.1 | 15.1 | 14.9 | 14.6 | 14.4 | 14.3 | 14.1 | 14.3 |
| <i>blr</i>   | 15.9 | 15.8 | 15.4 | 15.4 | 16.7 | 16.9 | 16.4 | 17.1 |
| <i>bolA</i>  | 17.0 | 17.2 | 16.7 | 16.5 | 16.4 | 16.7 | 15.7 | 16.5 |
| <i>borD</i>  | 18.3 | 17.9 | 17.6 | 18.0 | 18.1 | 18.5 | 17.6 | 17.8 |
| <i>brnQ</i>  | 14.6 | 14.8 | 14.6 | 14.1 | 15.4 | 15.9 | 15.9 | 15.9 |
| <i>bsmA</i>  | 14.4 | 14.3 | 14.0 | 14.0 | 14.3 | 14.3 | 14.2 | 14.3 |
| <i>bssR</i>  | 14.1 | 14.5 | 14.0 | 13.9 | 17.7 | 18.6 | 17.8 | 18.4 |
| <i>bssS</i>  | 15.4 | 15.5 | 15.1 | 15.0 | 16.3 | 16.4 | 15.7 | 16.1 |
| <i>btuB</i>  | 16.2 | 16.1 | 15.9 | 16.2 | 15.7 | 15.9 | 15.7 | 15.5 |
| <i>btuC</i>  | 14.3 | 14.3 | 14.2 | 13.9 | 14.3 | 14.5 | 14.3 | 14.3 |
| <i>btuD</i>  | 15.3 | 15.4 | 15.0 | 15.2 | 15.3 | 15.3 | 15.1 | 15.2 |
| <i>btuE</i>  | 16.4 | 16.4 | 16.0 | 16.2 | 16.3 | 16.4 | 15.8 | 16.0 |
| <i>btuF</i>  | 14.4 | 14.3 | 14.2 | 14.0 | 14.0 | 14.3 | 14.2 | 14.1 |
| <i>btuR</i>  | 14.8 | 14.9 | 14.6 | 14.4 | 14.8 | 14.9 | 14.7 | 14.8 |
| <i>C0067</i> | 13.0 | 12.9 | 12.9 | 13.2 | 13.0 | 13.0 | 12.7 | 13.0 |
| <i>C0293</i> | 14.1 | 14.2 | 14.0 | 13.7 | 13.7 | 13.6 | 13.3 | 13.3 |
| <i>C0299</i> | 13.7 | 13.7 | 13.3 | 14.2 | 13.6 | 13.9 | 13.4 | 13.5 |

|              |      |      |      |      |      |      |      |      |
|--------------|------|------|------|------|------|------|------|------|
| <i>C0343</i> | 15.8 | 15.6 | 15.7 | 15.3 | 15.7 | 15.7 | 15.1 | 15.1 |
| <i>C0362</i> | 13.9 | 14.9 | 14.4 | 13.6 | 13.4 | 15.1 | 14.4 | 13.3 |
| <i>C0465</i> | 13.6 | 13.5 | 13.2 | 13.6 | 13.4 | 13.4 | 13.2 | 13.2 |
| <i>C0614</i> | 14.6 | 15.2 | 14.0 | 13.6 | 14.3 | 14.6 | 13.8 | 14.2 |
| <i>C0664</i> | 16.8 | 16.4 | 15.4 | 15.6 | 14.6 | 15.6 | 14.6 | 15.4 |
| <i>C0719</i> | 14.2 | 13.8 | 13.8 | 13.2 | 13.5 | 14.1 | 13.4 | 13.6 |
| <i>cadA</i>  | 12.7 | 12.7 | 12.5 | 13.0 | 12.8 | 12.7 | 12.6 | 12.6 |
| <i>cadB</i>  | 12.6 | 12.6 | 12.6 | 13.4 | 12.8 | 12.7 | 12.6 | 12.7 |
| <i>cadC</i>  | 13.0 | 13.0 | 12.7 | 13.2 | 13.2 | 13.4 | 13.0 | 13.1 |
| <i>caiA</i>  | 13.3 | 13.2 | 13.1 | 13.3 | 13.8 | 13.9 | 13.7 | 13.8 |
| <i>caiB</i>  | 13.4 | 13.3 | 13.1 | 13.3 | 13.4 | 13.6 | 13.5 | 13.4 |
| <i>caiC</i>  | 13.3 | 13.3 | 13.0 | 13.0 | 13.3 | 13.6 | 13.3 | 13.4 |
| <i>caiD</i>  | 12.9 | 12.9 | 12.9 | 13.1 | 13.1 | 13.0 | 13.1 | 12.8 |
| <i>caiE</i>  | 13.0 | 13.0 | 12.9 | 13.2 | 13.2 | 12.9 | 13.0 | 12.7 |
| <i>caiF</i>  | 15.6 | 15.1 | 14.8 | 15.2 | 17.1 | 16.3 | 16.8 | 17.1 |
| <i>caiT</i>  | 12.6 | 12.7 | 12.6 | 12.7 | 12.7 | 12.7 | 12.7 | 12.7 |
| <i>can</i>   | 18.6 | 18.7 | 18.3 | 18.5 | 16.3 | 17.2 | 16.3 | 16.5 |
| <i>carA</i>  | 18.6 | 18.4 | 18.4 | 18.6 | 18.0 | 17.8 | 17.9 | 17.8 |
| <i>carB</i>  | 17.9 | 17.8 | 18.0 | 18.0 | 17.1 | 17.0 | 17.1 | 17.1 |
| <i>cas1</i>  | 13.7 | 13.7 | 13.5 | 13.7 | 13.8 | 13.9 | 13.7 | 13.6 |
| <i>cas2</i>  | 14.3 | 14.3 | 13.8 | 14.1 | 14.2 | 14.2 | 13.9 | 14.1 |
| <i>cas3</i>  | 13.1 | 13.0 | 12.8 | 13.2 | 13.2 | 13.2 | 13.0 | 13.0 |
| <i>casA</i>  | 13.1 | 13.0 | 12.9 | 13.2 | 13.1 | 13.0 | 12.9 | 12.8 |
| <i>casB</i>  | 13.7 | 13.7 | 13.4 | 13.1 | 13.4 | 13.6 | 13.2 | 13.1 |
| <i>casC</i>  | 13.6 | 13.5 | 13.2 | 13.5 | 13.2 | 13.4 | 13.1 | 13.1 |
| <i>casD</i>  | 13.8 | 13.7 | 13.5 | 13.4 | 13.7 | 13.9 | 13.6 | 13.5 |
| <i>casE</i>  | 14.2 | 14.1 | 13.7 | 13.8 | 13.9 | 14.3 | 13.8 | 14.0 |
| <i>cbl</i>   | 15.0 | 15.1 | 14.5 | 14.8 | 14.8 | 15.0 | 14.3 | 14.6 |
| <i>cbpA</i>  | 16.4 | 16.4 | 16.3 | 16.3 | 17.7 | 17.4 | 17.6 | 18.1 |
| <i>cbpM</i>  | 15.6 | 15.4 | 15.7 | 15.6 | 16.8 | 16.4 | 16.9 | 17.4 |
| <i>cbrA</i>  | 12.8 | 12.9 | 12.7 | 12.8 | 12.8 | 12.9 | 12.8 | 12.7 |
| <i>cbrB</i>  | 13.5 | 13.5 | 13.2 | 13.1 | 13.4 | 13.7 | 13.3 | 13.6 |
| <i>cbrC</i>  | 14.1 | 14.1 | 13.6 | 13.5 | 13.6 | 14.2 | 13.5 | 13.9 |
| <i>cca</i>   | 15.0 | 15.1 | 14.9 | 14.7 | 15.2 | 15.0 | 15.1 | 15.3 |
| <i>ccmA</i>  | 13.6 | 13.5 | 13.5 | 13.7 | 14.1 | 14.1 | 14.1 | 14.1 |
| <i>ccmB</i>  | 13.1 | 13.2 | 13.2 | 13.1 | 13.5 | 13.5 | 13.6 | 13.5 |
| <i>ccmC</i>  | 13.9 | 13.8 | 13.9 | 13.6 | 14.3 | 14.2 | 14.3 | 14.4 |
| <i>ccmD</i>  | 14.4 | 14.2 | 14.3 | 13.8 | 14.6 | 14.5 | 14.7 | 15.0 |
| <i>ccmE</i>  | 14.1 | 14.0 | 14.1 | 14.3 | 14.5 | 14.6 | 14.6 | 14.9 |
| <i>ccmF</i>  | 13.3 | 13.2 | 13.4 | 13.4 | 13.5 | 13.3 | 13.5 | 13.4 |
| <i>ccmG</i>  | 13.6 | 13.6 | 13.5 | 13.7 | 13.6 | 13.6 | 13.6 | 13.8 |
| <i>ccmH</i>  | 13.6 | 13.5 | 13.4 | 13.1 | 13.6 | 13.6 | 13.6 | 13.6 |
| <i>cdaR</i>  | 13.4 | 13.4 | 13.3 | 13.3 | 13.5 | 13.4 | 13.4 | 13.2 |
| <i>cdd</i>   | 14.6 | 14.8 | 14.2 | 14.3 | 14.9 | 15.3 | 15.1 | 15.4 |
| <i>cdh</i>   | 14.4 | 14.1 | 14.1 | 14.0 | 13.9 | 14.0 | 13.8 | 14.0 |
| <i>cdsA</i>  | 15.8 | 15.7 | 15.6 | 15.8 | 15.7 | 15.9 | 15.9 | 16.1 |
| <i>cedA</i>  | 14.7 | 14.7 | 14.2 | 14.1 | 14.3 | 14.8 | 13.9 | 14.4 |
| <i>cfa</i>   | 17.9 | 18.1 | 17.5 | 17.8 | 18.8 | 18.7 | 18.7 | 19.0 |
| <i>chaA</i>  | 15.9 | 16.0 | 15.6 | 15.9 | 13.8 | 14.4 | 13.8 | 13.9 |
| <i>chaB</i>  | 15.3 | 15.4 | 14.7 | 14.6 | 15.1 | 15.4 | 14.6 | 15.3 |
| <i>chaC</i>  | 15.1 | 15.2 | 14.8 | 14.9 | 15.3 | 15.6 | 15.0 | 15.3 |
| <i>chbA</i>  | 14.2 | 14.1 | 13.7 | 13.7 | 14.0 | 14.3 | 13.8 | 13.9 |
| <i>chbB</i>  | 15.2 | 14.8 | 14.4 | 14.3 | 14.1 | 14.7 | 14.0 | 14.2 |
| <i>chbC</i>  | 13.1 | 12.8 | 12.9 | 13.0 | 13.0 | 12.9 | 12.9 | 12.8 |
| <i>chbF</i>  | 13.4 | 13.4 | 13.2 | 13.4 | 13.4 | 13.6 | 13.2 | 13.3 |
| <i>chbG</i>  | 14.0 | 14.2 | 13.7 | 13.8 | 14.2 | 14.2 | 14.1 | 14.0 |
| <i>chbR</i>  | 13.8 | 13.7 | 13.3 | 13.9 | 13.7 | 13.9 | 13.5 | 13.5 |
| <i>cheA</i>  | 13.1 | 13.4 | 13.1 | 13.3 | 13.1 | 13.4 | 13.2 | 12.9 |
| <i>cheB</i>  | 12.9 | 13.1 | 12.9 | 13.2 | 13.1 | 13.1 | 13.0 | 12.8 |
| <i>cheR</i>  | 12.7 | 12.7 | 12.7 | 12.7 | 12.8 | 12.9 | 12.8 | 12.7 |
| <i>cheW</i>  | 13.3 | 13.7 | 13.2 | 13.3 | 13.1 | 13.8 | 13.3 | 13.3 |

|             |      |      |      |      |      |      |      |      |
|-------------|------|------|------|------|------|------|------|------|
| <i>cheY</i> | 13.8 | 14.0 | 13.6 | 13.9 | 13.7 | 14.1 | 13.7 | 13.6 |
| <i>cheZ</i> | 13.5 | 13.7 | 13.4 | 13.3 | 13.4 | 13.6 | 13.5 | 13.3 |
| <i>chiA</i> | 13.7 | 13.3 | 13.3 | 13.6 | 13.5 | 13.3 | 13.3 | 13.4 |
| <i>chiP</i> | 12.7 | 12.7 | 12.7 | 13.1 | 12.8 | 12.7 | 12.7 | 12.7 |
| <i>cho</i>  | 14.4 | 14.6 | 14.3 | 14.0 | 14.0 | 14.7 | 14.3 | 14.4 |
| <i>chpA</i> | 15.7 | 15.6 | 15.2 | 15.4 | 15.7 | 15.8 | 15.3 | 15.5 |
| <i>chpB</i> | 14.7 | 14.7 | 14.6 | 14.6 | 15.0 | 14.8 | 14.7 | 14.5 |
| <i>chpR</i> | 16.2 | 16.2 | 15.8 | 16.2 | 16.3 | 16.4 | 16.0 | 16.1 |
| <i>chpS</i> | 14.9 | 14.9 | 14.8 | 14.6 | 15.1 | 15.0 | 14.8 | 14.6 |
| <i>cirA</i> | 13.6 | 19.6 | 18.8 | 13.5 | 13.1 | 18.5 | 16.7 | 12.8 |
| <i>citC</i> | 12.6 | 12.6 | 12.5 | 13.0 | 12.7 | 12.6 | 12.6 | 12.5 |
| <i>citD</i> | 12.8 | 12.9 | 12.7 | 13.2 | 12.7 | 12.8 | 12.9 | 12.7 |
| <i>citE</i> | 12.7 | 12.7 | 12.6 | 13.1 | 12.7 | 12.7 | 12.8 | 12.6 |
| <i>citF</i> | 12.6 | 12.6 | 12.6 | 12.7 | 13.0 | 12.6 | 12.7 | 12.6 |
| <i>citG</i> | 12.7 | 12.7 | 12.6 | 13.0 | 12.8 | 12.8 | 12.7 | 12.6 |
| <i>citT</i> | 12.7 | 12.7 | 12.6 | 12.8 | 12.8 | 12.8 | 12.7 | 12.7 |
| <i>citX</i> | 12.8 | 12.8 | 12.7 | 13.0 | 12.8 | 12.8 | 12.8 | 12.7 |
| <i>clcA</i> | 14.5 | 14.7 | 14.5 | 14.0 | 14.8 | 15.0 | 14.7 | 14.8 |
| <i>clcB</i> | 13.2 | 13.3 | 13.2 | 13.3 | 13.3 | 13.4 | 13.4 | 13.2 |
| <i>cld</i>  | 18.1 | 18.0 | 17.6 | 17.8 | 17.9 | 18.0 | 17.5 | 17.6 |
| <i>clpA</i> | 17.1 | 17.3 | 17.0 | 17.1 | 16.8 | 17.0 | 16.8 | 16.9 |
| <i>clpB</i> | 16.6 | 16.6 | 16.6 | 16.7 | 17.1 | 17.2 | 17.0 | 17.2 |
| <i>clpP</i> | 18.1 | 18.0 | 17.8 | 18.0 | 18.0 | 18.1 | 17.9 | 18.0 |
| <i>clpS</i> | 17.2 | 17.2 | 16.9 | 16.7 | 17.4 | 17.5 | 16.8 | 16.9 |
| <i>clpX</i> | 17.8 | 17.9 | 17.4 | 17.9 | 17.5 | 18.0 | 17.5 | 17.9 |
| <i>cls</i>  | 15.9 | 15.9 | 15.7 | 15.7 | 16.1 | 16.2 | 16.1 | 16.2 |
| <i>cmk</i>  | 16.9 | 16.9 | 16.8 | 16.7 | 16.8 | 16.6 | 16.4 | 16.9 |
| <i>cmoA</i> | 15.9 | 15.7 | 15.7 | 15.7 | 15.6 | 15.9 | 15.7 | 15.8 |
| <i>cmoB</i> | 15.1 | 15.1 | 14.9 | 15.0 | 14.7 | 14.9 | 14.8 | 15.0 |
| <i>cmr</i>  | 14.1 | 14.0 | 14.0 | 13.5 | 13.8 | 13.9 | 13.7 | 13.8 |
| <i>cmtA</i> | 12.8 | 12.8 | 12.7 | 13.1 | 13.2 | 12.8 | 12.9 | 12.7 |
| <i>cmtB</i> | 12.8 | 12.7 | 12.7 | 13.4 | 12.7 | 12.8 | 12.6 | 12.6 |
| <i>cnu</i>  | 14.9 | 14.7 | 14.6 | 13.8 | 16.3 | 16.2 | 15.9 | 16.3 |
| <i>coaA</i> | 15.8 | 15.7 | 15.3 | 15.4 | 15.3 | 15.9 | 15.1 | 15.3 |
| <i>coaD</i> | 14.9 | 14.9 | 14.7 | 14.8 | 14.2 | 14.5 | 14.2 | 14.5 |
| <i>coaE</i> | 15.9 | 15.8 | 15.5 | 15.5 | 15.5 | 16.1 | 15.6 | 15.7 |
| <i>cobB</i> | 15.8 | 15.3 | 15.6 | 15.6 | 15.9 | 15.5 | 15.8 | 16.0 |
| <i>cobC</i> | 14.5 | 14.6 | 14.2 | 14.5 | 14.3 | 14.6 | 14.2 | 14.4 |
| <i>cobS</i> | 15.6 | 15.6 | 15.3 | 15.3 | 15.6 | 15.8 | 15.6 | 15.6 |
| <i>cobT</i> | 15.2 | 15.3 | 14.9 | 15.2 | 15.5 | 15.4 | 15.3 | 15.3 |
| <i>cobU</i> | 15.0 | 15.2 | 14.6 | 14.8 | 15.1 | 15.2 | 14.8 | 15.2 |
| <i>codA</i> | 17.9 | 17.7 | 17.8 | 18.0 | 17.9 | 17.3 | 17.8 | 17.7 |
| <i>codB</i> | 17.7 | 17.4 | 17.6 | 17.6 | 17.7 | 17.0 | 17.4 | 17.4 |
| <i>cof</i>  | 14.5 | 14.6 | 14.2 | 13.5 | 14.5 | 14.9 | 14.3 | 14.6 |
| <i>copA</i> | 14.9 | 15.2 | 15.5 | 14.7 | 15.2 | 14.6 | 14.9 | 15.1 |
| <i>corA</i> | 15.8 | 15.7 | 15.7 | 15.6 | 15.5 | 15.5 | 15.5 | 15.6 |
| <i>cpdA</i> | 15.6 | 15.8 | 15.5 | 15.3 | 15.7 | 16.0 | 15.8 | 15.8 |
| <i>cpdB</i> | 15.1 | 15.0 | 14.7 | 15.0 | 14.7 | 15.0 | 14.7 | 14.7 |
| <i>cpsB</i> | 12.8 | 12.9 | 12.7 | 13.0 | 13.1 | 12.8 | 12.9 | 12.7 |
| <i>cpsG</i> | 12.8 | 12.9 | 12.7 | 12.8 | 12.7 | 12.7 | 12.8 | 12.7 |
| <i>cpxA</i> | 15.8 | 15.7 | 15.3 | 15.7 | 15.6 | 15.8 | 15.6 | 16.0 |
| <i>cpXP</i> | 15.4 | 14.7 | 15.0 | 14.8 | 13.6 | 13.7 | 13.2 | 13.5 |
| <i>cpXR</i> | 17.1 | 17.0 | 16.7 | 17.1 | 17.0 | 17.0 | 17.0 | 17.2 |
| <i>crcB</i> | 15.2 | 14.4 | 14.8 | 14.8 | 15.5 | 14.6 | 15.2 | 15.5 |
| <i>creA</i> | 16.2 | 15.8 | 15.8 | 15.7 | 16.0 | 16.1 | 15.7 | 16.2 |
| <i>creB</i> | 14.8 | 14.7 | 14.7 | 14.6 | 14.9 | 14.8 | 14.9 | 14.9 |
| <i>creC</i> | 13.8 | 13.8 | 13.6 | 13.5 | 13.7 | 14.0 | 13.8 | 13.8 |
| <i>creD</i> | 13.2 | 13.2 | 13.0 | 13.4 | 13.4 | 13.3 | 13.1 | 13.0 |
| <i>crl</i>  | 18.5 | 18.2 | 18.0 | 18.5 | 16.1 | 16.3 | 15.7 | 16.1 |
| <i>crp</i>  | 18.3 | 18.3 | 18.2 | 18.1 | 18.3 | 18.4 | 18.2 | 18.2 |
| <i>crr</i>  | 19.1 | 19.1 | 18.8 | 19.1 | 19.1 | 19.2 | 19.2 | 19.3 |

|             |      |      |      |      |      |      |      |      |
|-------------|------|------|------|------|------|------|------|------|
| <i>csdA</i> | 14.8 | 14.8 | 14.6 | 14.4 | 14.6 | 14.9 | 14.6 | 14.9 |
| <i>csdE</i> | 14.9 | 15.0 | 14.5 | 14.6 | 14.5 | 15.0 | 14.4 | 14.8 |
| <i>csdL</i> | 14.8 | 14.9 | 14.6 | 14.7 | 14.8 | 14.8 | 14.7 | 14.8 |
| <i>csgA</i> | 14.2 | 14.2 | 14.2 | 14.3 | 14.8 | 14.6 | 14.5 | 14.5 |
| <i>csgB</i> | 13.4 | 13.4 | 13.3 | 13.6 | 13.6 | 13.7 | 13.4 | 13.4 |
| <i>csgC</i> | 13.0 | 13.3 | 12.9 | 13.0 | 13.1 | 13.2 | 13.7 | 12.8 |
| <i>csgD</i> | 15.4 | 15.8 | 15.0 | 15.3 | 15.4 | 16.2 | 15.3 | 15.1 |
| <i>csgE</i> | 14.5 | 14.6 | 14.2 | 14.1 | 14.6 | 15.2 | 14.5 | 14.2 |
| <i>csgF</i> | 14.8 | 14.9 | 14.6 | 14.6 | 14.7 | 15.6 | 14.9 | 14.5 |
| <i>csgG</i> | 14.3 | 14.4 | 14.3 | 14.0 | 14.3 | 15.0 | 14.6 | 14.2 |
| <i>csiD</i> | 14.1 | 14.0 | 14.0 | 13.7 | 13.2 | 13.0 | 13.0 | 13.1 |
| <i>csiE</i> | 13.7 | 13.7 | 13.5 | 13.2 | 13.2 | 13.3 | 13.2 | 13.2 |
| <i>csiR</i> | 14.3 | 14.2 | 14.0 | 14.2 | 14.2 | 14.1 | 13.9 | 14.0 |
| <i>cspA</i> | 17.1 | 16.8 | 16.4 | 16.3 | 16.1 | 16.8 | 16.0 | 16.4 |
| <i>cspB</i> | 13.3 | 13.4 | 13.0 | 13.0 | 13.0 | 13.7 | 12.9 | 13.1 |
| <i>cspC</i> | 19.9 | 19.4 | 19.5 | 19.3 | 20.1 | 19.8 | 19.5 | 19.9 |
| <i>cspD</i> | 18.3 | 18.3 | 18.4 | 17.7 | 18.2 | 19.0 | 18.1 | 18.6 |
| <i>cspE</i> | 19.1 | 19.1 | 19.4 | 18.8 | 19.2 | 19.1 | 18.6 | 19.2 |
| <i>cspF</i> | 13.6 | 13.5 | 13.3 | 13.2 | 13.3 | 13.6 | 13.1 | 13.1 |
| <i>cspG</i> | 13.7 | 13.7 | 13.2 | 13.4 | 13.2 | 14.0 | 13.2 | 13.3 |
| <i>cspH</i> | 13.3 | 13.2 | 12.9 | 13.0 | 13.2 | 13.2 | 12.9 | 12.9 |
| <i>cspI</i> | 13.1 | 13.1 | 12.9 | 13.1 | 13.1 | 13.3 | 13.0 | 12.9 |
| <i>csrA</i> | 18.5 | 18.5 | 18.4 | 18.2 | 18.7 | 18.6 | 18.4 | 18.4 |
| <i>csrB</i> | 19.9 | 19.9 | 20.0 | 19.6 | 20.3 | 19.7 | 19.8 | 19.5 |
| <i>csrC</i> | 18.3 | 18.4 | 18.5 | 17.8 | 19.8 | 18.9 | 18.9 | 18.7 |
| <i>csrD</i> | 14.0 | 14.0 | 13.9 | 13.5 | 14.2 | 14.1 | 14.0 | 14.2 |
| <i>cstA</i> | 15.4 | 15.7 | 16.0 | 15.3 | 13.6 | 15.0 | 15.0 | 13.5 |
| <i>cueO</i> | 15.3 | 14.6 | 15.5 | 15.4 | 14.4 | 14.0 | 14.1 | 14.1 |
| <i>cueR</i> | 15.3 | 15.4 | 15.1 | 14.7 | 16.0 | 15.6 | 15.7 | 16.0 |
| <i>cusA</i> | 13.2 | 13.3 | 13.0 | 13.4 | 13.2 | 12.9 | 13.1 | 12.9 |
| <i>cusB</i> | 13.6 | 13.9 | 13.2 | 13.6 | 13.2 | 13.0 | 12.9 | 13.1 |
| <i>cusC</i> | 14.0 | 14.4 | 13.2 | 13.7 | 13.3 | 12.7 | 12.7 | 13.1 |
| <i>cusF</i> | 15.3 | 15.8 | 14.3 | 15.1 | 14.4 | 13.7 | 13.4 | 14.1 |
| <i>cusR</i> | 14.7 | 14.8 | 14.4 | 14.4 | 14.5 | 14.5 | 14.2 | 14.4 |
| <i>cusS</i> | 14.1 | 14.1 | 13.7 | 13.7 | 13.6 | 13.8 | 13.5 | 13.6 |
| <i>cutA</i> | 16.4 | 16.5 | 15.9 | 16.2 | 16.1 | 16.6 | 15.9 | 16.0 |
| <i>cutC</i> | 15.0 | 15.4 | 14.8 | 14.9 | 15.3 | 15.3 | 14.7 | 15.5 |
| <i>cvpA</i> | 18.1 | 18.1 | 17.9 | 18.1 | 18.0 | 18.0 | 17.9 | 18.0 |
| <i>cvrA</i> | 14.5 | 14.4 | 14.0 | 14.1 | 14.4 | 14.7 | 14.3 | 14.6 |
| <i>cyaA</i> | 16.4 | 16.5 | 16.2 | 16.2 | 16.5 | 16.6 | 16.6 | 16.6 |
| <i>cyaR</i> | 16.5 | 16.7 | 15.8 | 16.5 | 15.2 | 16.2 | 15.2 | 15.9 |
| <i>cyaY</i> | 15.5 | 15.3 | 15.2 | 15.2 | 15.2 | 14.9 | 14.8 | 15.1 |
| <i>cybB</i> | 17.0 | 16.8 | 16.6 | 16.8 | 16.1 | 16.4 | 15.9 | 15.9 |
| <i>cybC</i> | 15.0 | 14.9 | 14.4 | 15.3 | 14.3 | 15.1 | 14.2 | 14.6 |
| <i>cycA</i> | 16.0 | 16.0 | 15.9 | 16.1 | 15.9 | 16.0 | 16.1 | 16.1 |
| <i>cydA</i> | 17.0 | 16.8 | 17.5 | 17.1 | 18.1 | 17.7 | 18.1 | 18.1 |
| <i>cydB</i> | 16.6 | 16.5 | 17.2 | 16.8 | 17.8 | 17.3 | 17.9 | 17.7 |
| <i>cydC</i> | 15.1 | 15.1 | 14.9 | 14.7 | 14.5 | 15.2 | 14.7 | 14.7 |
| <i>cydD</i> | 15.1 | 15.1 | 15.0 | 14.7 | 14.5 | 15.2 | 14.7 | 14.7 |
| <i>cynR</i> | 13.6 | 13.6 | 13.5 | 13.5 | 13.4 | 13.6 | 13.5 | 13.4 |
| <i>cynS</i> | 13.4 | 13.5 | 13.1 | 13.1 | 13.4 | 13.7 | 13.5 | 13.5 |
| <i>cynT</i> | 12.8 | 12.9 | 12.8 | 13.0 | 12.8 | 12.8 | 12.9 | 12.8 |
| <i>cynX</i> | 12.7 | 12.8 | 12.8 | 13.7 | 13.0 | 12.9 | 13.0 | 12.8 |
| <i>cyoA</i> | 19.1 | 19.3 | 19.4 | 19.3 | 13.4 | 13.7 | 13.4 | 14.9 |
| <i>cyoB</i> | 18.7 | 18.7 | 19.0 | 18.8 | 13.2 | 13.6 | 13.5 | 14.8 |
| <i>cyoC</i> | 18.5 | 18.5 | 18.6 | 18.6 | 13.3 | 13.6 | 13.6 | 14.7 |
| <i>cyoD</i> | 18.7 | 18.8 | 18.8 | 18.9 | 13.5 | 14.0 | 13.7 | 14.6 |
| <i>cyoE</i> | 17.8 | 17.9 | 18.1 | 18.0 | 13.7 | 13.8 | 13.8 | 14.3 |
| <i>cysA</i> | 16.9 | 17.1 | 17.2 | 16.8 | 17.2 | 17.4 | 17.4 | 17.3 |
| <i>cysB</i> | 16.8 | 16.8 | 16.3 | 16.7 | 16.2 | 16.8 | 16.1 | 16.1 |
| <i>cysC</i> | 16.7 | 17.1 | 16.5 | 16.7 | 16.7 | 17.0 | 16.6 | 16.6 |



|             |      |      |      |      |      |      |      |      |
|-------------|------|------|------|------|------|------|------|------|
| <i>cysD</i> | 18.4 | 18.6 | 18.4 | 18.4 | 18.3 | 18.6 | 18.4 | 18.1 |
| <i>cysE</i> | 16.4 | 15.8 | 16.2 | 16.2 | 15.9 | 15.8 | 16.0 | 16.2 |
| <i>cysG</i> | 14.6 | 14.6 | 14.4 | 14.4 | 14.9 | 15.0 | 15.2 | 15.1 |
| <i>cysH</i> | 17.7 | 17.4 | 17.6 | 17.9 | 17.5 | 17.6 | 17.4 | 17.5 |
| <i>cysI</i> | 17.6 | 17.1 | 17.8 | 17.8 | 17.6 | 17.1 | 17.7 | 17.6 |
| <i>cysJ</i> | 17.8 | 17.3 | 17.8 | 17.8 | 17.5 | 17.3 | 17.7 | 17.7 |
| <i>cysK</i> | 19.6 | 19.7 | 19.8 | 19.6 | 19.6 | 19.7 | 19.7 | 19.7 |
| <i>cysM</i> | 16.8 | 16.7 | 17.1 | 16.8 | 17.3 | 16.6 | 17.1 | 16.8 |
| <i>cysN</i> | 17.8 | 18.1 | 17.9 | 18.0 | 17.8 | 18.0 | 17.9 | 17.8 |
| <i>cysP</i> | 17.3 | 17.3 | 17.4 | 17.2 | 17.5 | 17.6 | 17.5 | 17.4 |
| <i>cysQ</i> | 15.0 | 15.1 | 14.8 | 14.9 | 14.8 | 15.0 | 14.7 | 14.8 |
| <i>cysS</i> | 16.1 | 16.1 | 15.9 | 16.1 | 16.0 | 16.2 | 16.0 | 16.1 |
| <i>cysT</i> | 18.3 | 18.6 | 18.0 | 17.5 | 18.1 | 18.9 | 17.4 | 18.4 |
| <i>cysU</i> | 16.3 | 16.3 | 16.3 | 16.0 | 16.4 | 16.6 | 16.4 | 16.7 |
| <i>cysW</i> | 16.4 | 16.6 | 16.5 | 16.2 | 16.7 | 16.9 | 16.6 | 16.7 |
| <i>cysZ</i> | 15.3 | 15.4 | 15.2 | 14.9 | 15.1 | 15.6 | 15.2 | 15.4 |
| <i>cytR</i> | 15.6 | 15.6 | 15.3 | 15.3 | 15.3 | 15.6 | 15.2 | 15.3 |
| <i>dacA</i> | 16.8 | 16.7 | 16.6 | 16.7 | 16.6 | 16.7 | 16.6 | 16.7 |
| <i>dacB</i> | 15.1 | 15.0 | 14.8 | 14.6 | 14.6 | 15.1 | 14.8 | 14.9 |
| <i>dacC</i> | 15.8 | 15.4 | 15.7 | 15.7 | 15.8 | 15.3 | 15.6 | 15.8 |
| <i>dacD</i> | 13.8 | 13.8 | 13.5 | 13.7 | 13.9 | 14.0 | 13.6 | 13.6 |
| <i>dadA</i> | 14.9 | 14.6 | 15.0 | 14.7 | 14.3 | 14.4 | 14.4 | 14.2 |
| <i>dadX</i> | 14.0 | 13.9 | 14.3 | 14.0 | 13.7 | 13.8 | 13.8 | 13.6 |
| <i>dam</i>  | 16.3 | 16.3 | 15.9 | 16.0 | 16.1 | 16.7 | 16.0 | 16.2 |
| <i>damX</i> | 17.0 | 17.0 | 16.8 | 17.0 | 17.0 | 17.2 | 17.1 | 17.1 |
| <i>dapA</i> | 18.4 | 18.4 | 18.2 | 18.4 | 18.5 | 18.5 | 18.4 | 18.5 |
| <i>dapB</i> | 17.4 | 17.2 | 17.2 | 17.1 | 16.7 | 16.6 | 16.4 | 16.5 |
| <i>dapD</i> | 18.2 | 18.2 | 18.2 | 18.2 | 18.0 | 18.0 | 18.1 | 18.2 |
| <i>dapE</i> | 15.5 | 15.4 | 15.3 | 15.4 | 15.5 | 15.6 | 15.5 | 15.5 |
| <i>dapF</i> | 16.3 | 16.3 | 16.0 | 16.3 | 16.3 | 16.3 | 16.2 | 16.4 |
| <i>dbpA</i> | 14.4 | 14.4 | 13.9 | 14.1 | 14.0 | 14.1 | 13.8 | 14.1 |
| <i>dcd</i>  | 15.4 | 15.4 | 15.6 | 15.3 | 16.0 | 15.7 | 15.8 | 15.8 |
| <i>dcm</i>  | 15.5 | 15.5 | 15.0 | 15.3 | 15.4 | 15.7 | 15.2 | 15.4 |
| <i>dcp</i>  | 16.8 | 16.8 | 16.4 | 16.8 | 16.3 | 16.6 | 16.3 | 16.4 |
| <i>dcrB</i> | 17.2 | 17.2 | 16.7 | 16.8 | 16.3 | 16.9 | 16.2 | 16.4 |
| <i>dctA</i> | 15.1 | 14.6 | 15.0 | 14.9 | 13.6 | 13.6 | 13.7 | 13.7 |
| <i>dctR</i> | 14.1 | 14.0 | 13.5 | 13.9 | 15.8 | 15.1 | 15.3 | 16.0 |
| <i>dcuA</i> | 16.8 | 16.3 | 16.7 | 16.6 | 16.9 | 17.0 | 17.5 | 17.2 |
| <i>dcuB</i> | 12.9 | 12.7 | 12.8 | 13.0 | 16.4 | 16.5 | 16.2 | 16.3 |
| <i>dcuC</i> | 12.7 | 12.7 | 12.6 | 13.1 | 15.5 | 15.3 | 15.8 | 15.8 |
| <i>dcuD</i> | 12.7 | 12.6 | 12.6 | 12.8 | 12.8 | 12.7 | 12.7 | 12.6 |
| <i>dcuR</i> | 14.8 | 14.9 | 14.5 | 14.4 | 14.3 | 15.0 | 14.5 | 14.7 |
| <i>dcuS</i> | 14.2 | 14.1 | 13.9 | 13.9 | 14.1 | 14.3 | 13.9 | 14.0 |
| <i>dcyD</i> | 16.3 | 16.4 | 16.1 | 16.3 | 16.3 | 16.5 | 16.3 | 16.2 |
| <i>dllA</i> | 15.4 | 15.3 | 15.1 | 15.1 | 15.7 | 16.0 | 15.8 | 16.1 |
| <i>dllB</i> | 16.0 | 16.0 | 15.6 | 15.6 | 16.3 | 16.3 | 15.8 | 16.0 |
| <i>ddpA</i> | 13.4 | 13.2 | 13.1 | 13.1 | 12.9 | 12.9 | 12.8 | 12.8 |
| <i>ddpB</i> | 13.0 | 12.9 | 12.9 | 13.5 | 13.0 | 12.8 | 13.0 | 13.3 |
| <i>ddpC</i> | 13.1 | 13.1 | 13.0 | 13.0 | 13.1 | 13.0 | 13.1 | 13.1 |
| <i>ddpD</i> | 12.9 | 12.8 | 12.8 | 12.9 | 12.9 | 12.9 | 12.9 | 12.8 |
| <i>ddpF</i> | 13.0 | 13.0 | 13.0 | 13.6 | 13.2 | 13.0 | 13.1 | 12.9 |
| <i>ddpX</i> | 13.3 | 13.1 | 13.1 | 13.1 | 12.8 | 12.7 | 12.7 | 12.7 |
| <i>deaD</i> | 15.9 | 15.7 | 15.4 | 16.0 | 16.0 | 16.2 | 16.2 | 16.3 |
| <i>dedA</i> | 16.1 | 15.9 | 15.8 | 15.8 | 15.8 | 16.2 | 15.8 | 15.9 |
| <i>dedD</i> | 15.7 | 15.8 | 15.7 | 15.4 | 15.7 | 15.8 | 15.5 | 15.6 |
| <i>def</i>  | 17.4 | 17.3 | 16.8 | 17.2 | 17.0 | 17.4 | 16.7 | 17.1 |
| <i>degP</i> | 15.9 | 16.3 | 16.1 | 15.8 | 16.2 | 15.7 | 15.8 | 16.2 |
| <i>degQ</i> | 15.3 | 15.2 | 15.0 | 15.3 | 15.0 | 15.2 | 15.0 | 15.1 |
| <i>degS</i> | 14.9 | 15.0 | 14.8 | 15.0 | 14.8 | 15.1 | 14.9 | 15.1 |
| <i>deoA</i> | 14.9 | 14.8 | 14.6 | 15.0 | 15.3 | 15.0 | 15.1 | 15.2 |
| <i>deoB</i> | 16.3 | 16.3 | 16.4 | 16.4 | 16.6 | 16.5 | 16.8 | 16.7 |

|             |      |      |      |      |      |      |      |      |
|-------------|------|------|------|------|------|------|------|------|
| <i>deoC</i> | 15.5 | 15.4 | 15.2 | 15.5 | 15.5 | 15.8 | 15.7 | 15.8 |
| <i>deoD</i> | 17.7 | 17.6 | 17.6 | 17.7 | 17.5 | 17.6 | 17.6 | 17.6 |
| <i>deoR</i> | 15.6 | 15.5 | 15.3 | 15.4 | 15.5 | 15.9 | 15.5 | 15.8 |
| <i>der</i>  | 15.8 | 15.8 | 15.8 | 15.9 | 15.9 | 15.8 | 15.8 | 15.8 |
| <i>dfp</i>  | 16.5 | 16.3 | 16.4 | 16.1 | 16.0 | 16.5 | 16.2 | 15.9 |
| <i>dgkA</i> | 16.3 | 16.2 | 16.0 | 15.9 | 15.9 | 16.2 | 15.7 | 16.0 |
| <i>dgoA</i> | 13.1 | 13.1 | 13.0 | 13.3 | 13.1 | 13.2 | 13.1 | 12.9 |
| <i>dgoD</i> | 13.2 | 13.2 | 13.1 | 13.1 | 13.2 | 13.2 | 13.2 | 13.1 |
| <i>dgoK</i> | 13.3 | 13.3 | 13.1 | 13.0 | 13.3 | 13.3 | 13.3 | 13.1 |
| <i>dgoR</i> | 14.0 | 14.0 | 13.8 | 13.5 | 13.8 | 14.0 | 13.9 | 13.9 |
| <i>dgoT</i> | 12.7 | 12.7 | 12.7 | 12.8 | 12.8 | 12.7 | 12.7 | 12.7 |
| <i>dgsA</i> | 14.8 | 14.6 | 14.8 | 14.5 | 15.1 | 14.8 | 14.8 | 14.9 |
| <i>dgt</i>  | 14.8 | 14.6 | 14.5 | 14.4 | 14.5 | 14.7 | 14.4 | 14.5 |
| <i>dhaK</i> | 15.9 | 15.4 | 15.3 | 15.8 | 15.7 | 15.8 | 15.9 | 15.7 |
| <i>dhaL</i> | 15.9 | 15.5 | 15.4 | 15.8 | 15.9 | 15.8 | 15.9 | 15.9 |
| <i>dhaM</i> | 16.0 | 15.7 | 15.4 | 16.0 | 15.9 | 16.1 | 16.1 | 16.0 |
| <i>dhaR</i> | 13.8 | 13.8 | 13.6 | 13.7 | 13.8 | 13.9 | 13.6 | 13.6 |
| <i>diaA</i> | 16.5 | 16.5 | 16.1 | 16.3 | 16.3 | 16.5 | 16.1 | 16.5 |
| <i>dicA</i> | 16.6 | 16.6 | 16.0 | 15.8 | 16.5 | 16.9 | 15.9 | 16.3 |
| <i>dicB</i> | 12.9 | 13.0 | 12.8 | 13.2 | 12.9 | 13.2 | 12.8 | 12.8 |
| <i>dicC</i> | 13.1 | 13.0 | 12.9 | 13.1 | 13.1 | 12.9 | 12.9 | 13.0 |
| <i>dicF</i> | 13.6 | 13.6 | 13.5 | 13.3 | 13.5 | 13.8 | 13.6 | 13.7 |
| <i>dinB</i> | 14.0 | 14.2 | 14.0 | 13.6 | 13.6 | 14.0 | 13.7 | 13.8 |
| <i>dinD</i> | 13.7 | 13.8 | 13.5 | 13.4 | 13.5 | 13.5 | 13.2 | 13.2 |
| <i>dinF</i> | 13.5 | 13.5 | 13.5 | 13.7 | 13.4 | 13.4 | 13.5 | 13.3 |
| <i>dinG</i> | 13.8 | 13.8 | 13.7 | 13.4 | 13.7 | 13.7 | 13.6 | 13.5 |
| <i>dinI</i> | 17.0 | 17.3 | 17.0 | 16.8 | 16.4 | 16.9 | 16.2 | 16.5 |
| <i>dinJ</i> | 16.8 | 17.0 | 16.5 | 16.3 | 16.7 | 17.1 | 16.2 | 16.4 |
| <i>dinQ</i> | 17.1 | 17.7 | 16.8 | 16.9 | 16.9 | 17.3 | 16.6 | 17.9 |
| <i>dipZ</i> | 14.9 | 15.1 | 14.7 | 14.7 | 14.5 | 15.1 | 14.7 | 14.9 |
| <i>djlA</i> | 15.0 | 15.0 | 14.8 | 14.5 | 15.1 | 15.3 | 14.8 | 15.0 |
| <i>djlB</i> | 12.8 | 12.8 | 12.7 | 13.3 | 12.9 | 12.8 | 12.7 | 12.6 |
| <i>djlC</i> | 13.3 | 13.3 | 13.0 | 13.2 | 13.3 | 13.4 | 13.1 | 13.1 |
| <i>dkgA</i> | 16.2 | 16.3 | 15.8 | 16.1 | 15.5 | 15.9 | 15.5 | 15.7 |
| <i>dkgB</i> | 15.2 | 15.2 | 14.9 | 14.7 | 13.9 | 14.5 | 13.9 | 14.1 |
| <i>dksA</i> | 17.3 | 17.3 | 17.3 | 17.2 | 17.0 | 17.2 | 16.8 | 16.9 |
| <i>dld</i>  | 16.6 | 16.9 | 16.7 | 16.7 | 15.9 | 16.5 | 16.1 | 16.1 |
| <i>dmlA</i> | 13.5 | 13.6 | 13.4 | 13.3 | 13.5 | 13.8 | 13.7 | 13.6 |
| <i>dmlR</i> | 14.4 | 14.1 | 14.2 | 13.7 | 14.3 | 14.3 | 14.2 | 14.3 |
| <i>dmsA</i> | 13.4 | 13.0 | 13.3 | 13.5 | 17.4 | 14.6 | 17.4 | 17.3 |
| <i>dmsB</i> | 13.3 | 13.0 | 13.2 | 13.5 | 16.9 | 14.3 | 17.0 | 17.2 |
| <i>dmsC</i> | 13.1 | 12.9 | 13.0 | 13.3 | 16.0 | 13.9 | 16.2 | 16.4 |
| <i>dmsD</i> | 14.6 | 14.5 | 14.2 | 14.1 | 15.5 | 14.9 | 15.5 | 15.6 |
| <i>dnaA</i> | 15.8 | 15.6 | 15.6 | 15.6 | 15.9 | 15.9 | 16.0 | 16.0 |
| <i>dnaB</i> | 15.8 | 15.8 | 15.5 | 15.5 | 15.6 | 15.7 | 15.6 | 15.7 |
| <i>dnaC</i> | 15.0 | 14.9 | 14.7 | 14.6 | 14.8 | 15.1 | 14.8 | 15.1 |
| <i>dnaE</i> | 15.1 | 15.0 | 15.0 | 14.7 | 15.0 | 15.0 | 14.9 | 14.8 |
| <i>dnaG</i> | 16.0 | 15.8 | 15.8 | 15.9 | 16.0 | 16.2 | 15.9 | 16.0 |
| <i>dnaJ</i> | 17.0 | 16.8 | 17.1 | 17.0 | 16.9 | 16.8 | 16.8 | 16.8 |
| <i>dnaK</i> | 18.5 | 18.4 | 18.5 | 18.6 | 18.5 | 18.3 | 18.4 | 18.6 |
| <i>dnaN</i> | 16.0 | 15.7 | 15.7 | 15.8 | 15.9 | 15.9 | 15.9 | 16.0 |
| <i>dnaQ</i> | 15.9 | 16.0 | 15.5 | 15.7 | 15.9 | 16.0 | 15.5 | 15.9 |
| <i>dnaT</i> | 14.7 | 14.6 | 14.6 | 14.3 | 14.7 | 14.7 | 14.7 | 14.9 |
| <i>dnaX</i> | 15.3 | 15.4 | 15.2 | 15.0 | 15.2 | 15.4 | 15.3 | 15.4 |
| <i>dosC</i> | 14.8 | 14.9 | 14.4 | 14.4 | 13.6 | 14.1 | 13.5 | 13.6 |
| <i>dosP</i> | 13.7 | 13.9 | 13.4 | 14.4 | 13.2 | 13.3 | 13.0 | 13.0 |
| <i>dpiA</i> | 14.0 | 13.9 | 13.7 | 13.8 | 13.9 | 14.1 | 13.9 | 14.0 |
| <i>dpiB</i> | 13.6 | 13.6 | 13.4 | 13.5 | 13.7 | 13.8 | 13.5 | 13.6 |
| <i>dppA</i> | 18.7 | 18.5 | 18.6 | 18.8 | 19.1 | 19.1 | 19.3 | 19.0 |
| <i>dppB</i> | 16.1 | 14.0 | 16.3 | 16.3 | 17.1 | 14.8 | 17.4 | 17.0 |
| <i>dppC</i> | 16.1 | 13.9 | 16.2 | 16.2 | 17.0 | 14.5 | 17.2 | 16.9 |

|               |      |      |      |      |      |      |      |      |
|---------------|------|------|------|------|------|------|------|------|
| <i>dppD</i>   | 16.4 | 14.3 | 16.5 | 16.5 | 17.3 | 15.0 | 17.5 | 17.0 |
| <i>dppF</i>   | 16.1 | 14.0 | 16.2 | 16.0 | 16.9 | 14.7 | 17.2 | 17.0 |
| <i>dps</i>    | 18.6 | 18.3 | 17.9 | 18.6 | 18.6 | 17.5 | 17.0 | 18.8 |
| <i>dsbA</i>   | 17.3 | 17.1 | 16.6 | 17.2 | 16.8 | 16.8 | 16.5 | 17.0 |
| <i>dsbB</i>   | 15.2 | 15.2 | 15.0 | 14.7 | 14.8 | 15.4 | 15.1 | 15.6 |
| <i>dsbC</i>   | 16.8 | 16.8 | 16.1 | 16.8 | 16.4 | 16.8 | 16.3 | 16.5 |
| <i>dsbG</i>   | 15.0 | 14.7 | 14.4 | 14.6 | 14.6 | 14.8 | 14.3 | 14.4 |
| <i>dsdA</i>   | 13.9 | 13.9 | 13.7 | 13.8 | 13.7 | 13.8 | 13.6 | 13.6 |
| <i>dsdC</i>   | 13.7 | 13.7 | 13.5 | 13.5 | 13.2 | 13.6 | 13.4 | 13.4 |
| <i>dsdX</i>   | 13.1 | 13.0 | 12.9 | 12.9 | 12.9 | 13.1 | 12.9 | 12.9 |
| <i>dsrA</i>   | 13.8 | 13.7 | 13.3 | 12.9 | 13.4 | 14.0 | 13.0 | 13.0 |
| <i>dsrB</i>   | 15.1 | 15.0 | 14.6 | 14.3 | 14.7 | 14.5 | 13.9 | 14.2 |
| <i>dtf</i>    | 16.3 | 16.3 | 16.2 | 16.2 | 17.0 | 16.7 | 16.6 | 16.6 |
| <i>dtpB</i>   | 13.7 | 13.3 | 13.4 | 13.5 | 13.4 | 13.3 | 13.5 | 13.7 |
| <i>dtpD</i>   | 14.3 | 14.4 | 14.1 | 14.1 | 14.5 | 14.8 | 14.6 | 14.7 |
| <i>dusA</i>   | 15.1 | 15.0 | 14.8 | 14.8 | 14.8 | 15.0 | 14.6 | 14.7 |
| <i>dusB</i>   | 17.8 | 17.6 | 17.4 | 17.7 | 18.2 | 18.0 | 18.0 | 18.1 |
| <i>dusC</i>   | 14.0 | 14.0 | 13.8 | 13.9 | 13.8 | 13.6 | 13.5 | 13.4 |
| <i>dut</i>    | 16.7 | 16.6 | 16.9 | 16.8 | 16.4 | 16.4 | 16.6 | 16.2 |
| <i>dxr</i>    | 14.9 | 14.9 | 14.7 | 14.8 | 14.6 | 14.8 | 14.7 | 14.8 |
| <i>dxs</i>    | 15.8 | 15.4 | 15.6 | 15.5 | 15.4 | 15.3 | 15.5 | 15.7 |
| <i>eaeH</i>   | 12.8 | 12.8 | 12.6 | 13.6 | 13.0 | 12.8 | 12.7 | 12.7 |
| <i>eamA</i>   | 15.4 | 15.4 | 15.2 | 15.1 | 14.6 | 14.7 | 14.4 | 14.6 |
| <i>eamB</i>   | 13.4 | 13.4 | 13.2 | 13.3 | 13.3 | 13.6 | 13.2 | 13.4 |
| <i>ebgA</i>   | 12.6 | 12.6 | 12.6 | 12.8 | 12.8 | 12.7 | 12.6 | 12.8 |
| <i>ebgC</i>   | 12.8 | 12.8 | 12.6 | 13.3 | 12.6 | 12.8 | 12.7 | 12.6 |
| <i>ebgR</i>   | 14.5 | 14.5 | 14.1 | 14.5 | 14.3 | 14.5 | 14.1 | 14.2 |
| <i>ecnA</i>   | 15.3 | 15.2 | 14.8 | 14.9 | 14.9 | 15.3 | 14.9 | 15.3 |
| <i>ecnB</i>   | 17.8 | 17.9 | 17.0 | 17.1 | 15.6 | 16.3 | 15.0 | 16.2 |
| <i>eco</i>    | 14.8 | 14.4 | 14.3 | 14.2 | 14.4 | 15.0 | 14.6 | 14.5 |
| <i>ecpD</i>   | 12.6 | 12.5 | 12.5 | 13.8 | 12.7 | 12.6 | 12.5 | 12.6 |
| <i>eda</i>    | 16.5 | 16.4 | 16.5 | 16.3 | 17.1 | 16.6 | 16.9 | 16.9 |
| <i>edd</i>    | 15.0 | 15.0 | 14.9 | 14.8 | 15.5 | 15.0 | 15.2 | 14.9 |
| <i>efeB</i>   | 14.7 | 16.9 | 16.4 | 14.2 | 13.1 | 15.1 | 14.7 | 12.9 |
| <i>efeO</i>   | 15.7 | 18.1 | 17.5 | 15.5 | 13.1 | 16.1 | 15.6 | 13.2 |
| <i>efeU_1</i> | 16.2 | 18.6 | 18.2 | 15.7 | 13.6 | 17.1 | 16.4 | 13.3 |
| <i>efeU_2</i> | 14.5 | 16.8 | 16.3 | 13.7 | 13.0 | 15.2 | 14.7 | 12.8 |
| <i>efp</i>    | 18.1 | 17.9 | 17.9 | 18.1 | 17.9 | 17.8 | 17.8 | 18.1 |
| <i>elaA</i>   | 15.6 | 15.6 | 15.1 | 15.3 | 15.5 | 15.4 | 15.0 | 15.3 |
| <i>elaB</i>   | 17.8 | 17.9 | 17.6 | 17.4 | 17.9 | 17.6 | 17.0 | 17.8 |
| <i>elaD</i>   | 13.0 | 12.9 | 12.7 | 13.2 | 12.9 | 13.0 | 12.7 | 12.8 |
| <i>elbB</i>   | 16.1 | 16.1 | 15.7 | 15.9 | 16.1 | 16.3 | 16.1 | 16.5 |
| <i>elfA</i>   | 13.2 | 13.0 | 12.9 | 13.0 | 13.1 | 13.2 | 12.9 | 13.0 |
| <i>elfC</i>   | 12.9 | 12.8 | 12.7 | 12.9 | 12.9 | 13.0 | 12.8 | 12.8 |
| <i>elfD</i>   | 12.8 | 12.8 | 12.6 | 13.1 | 12.9 | 12.8 | 12.7 | 12.7 |
| <i>elfG</i>   | 13.3 | 13.3 | 13.1 | 13.4 | 13.4 | 13.4 | 13.3 | 13.2 |
| <i>emrA</i>   | 15.6 | 15.0 | 15.1 | 15.5 | 15.2 | 14.9 | 15.3 | 15.3 |
| <i>emrB</i>   | 14.3 | 13.8 | 14.2 | 14.0 | 14.0 | 13.8 | 14.4 | 14.3 |
| <i>emrD</i>   | 12.7 | 12.7 | 12.6 | 12.9 | 12.8 | 12.6 | 12.8 | 12.6 |
| <i>emrE</i>   | 14.6 | 14.5 | 14.3 | 13.5 | 14.3 | 14.6 | 14.2 | 14.2 |
| <i>emrK</i>   | 12.8 | 12.8 | 12.7 | 13.3 | 12.9 | 12.8 | 12.6 | 12.6 |
| <i>emrY</i>   | 12.7 | 12.7 | 12.7 | 12.9 | 12.7 | 12.7 | 12.6 | 12.7 |
| <i>emtA</i>   | 16.3 | 16.3 | 15.9 | 16.0 | 16.0 | 16.2 | 15.8 | 15.9 |
| <i>endA</i>   | 13.1 | 12.9 | 12.8 | 13.0 | 13.2 | 13.2 | 13.2 | 13.2 |
| <i>eno</i>    | 19.0 | 19.1 | 18.8 | 19.1 | 19.6 | 19.6 | 19.8 | 19.8 |
| <i>entA</i>   | 13.4 | 18.3 | 18.5 | 13.4 | 13.3 | 17.8 | 18.1 | 12.9 |
| <i>entB</i>   | 13.5 | 18.6 | 18.7 | 13.5 | 13.1 | 18.1 | 18.2 | 12.8 |
| <i>entC</i>   | 13.2 | 18.7 | 19.0 | 13.3 | 12.7 | 17.9 | 17.9 | 12.5 |
| <i>entD</i>   | 13.0 | 17.7 | 17.0 | 12.9 | 13.0 | 18.0 | 17.6 | 12.8 |
| <i>entE</i>   | 13.2 | 18.5 | 18.7 | 12.9 | 12.7 | 17.9 | 17.9 | 12.6 |
| <i>entF</i>   | 13.1 | 17.9 | 17.9 | 13.1 | 12.9 | 17.6 | 17.8 | 12.9 |

|             |      |      |      |      |      |      |      |      |
|-------------|------|------|------|------|------|------|------|------|
| <i>entH</i> | 13.5 | 18.2 | 18.3 | 13.2 | 13.4 | 17.8 | 18.0 | 13.2 |
| <i>entS</i> | 13.1 | 15.5 | 15.9 | 13.3 | 12.9 | 15.5 | 15.8 | 12.7 |
| <i>envC</i> | 15.4 | 15.5 | 15.2 | 15.2 | 15.4 | 15.7 | 15.5 | 15.6 |
| <i>envR</i> | 12.7 | 12.9 | 12.5 | 13.0 | 12.7 | 12.7 | 12.6 | 12.5 |
| <i>envY</i> | 13.3 | 13.3 | 13.0 | 13.2 | 13.2 | 13.4 | 14.0 | 13.1 |
| <i>envZ</i> | 14.2 | 14.1 | 14.0 | 13.8 | 14.1 | 14.1 | 14.1 | 14.2 |
| <i>epd</i>  | 16.5 | 16.3 | 16.3 | 16.5 | 17.0 | 17.2 | 17.1 | 16.9 |
| <i>eptA</i> | 16.4 | 15.8 | 16.0 | 16.3 | 15.2 | 13.7 | 13.6 | 15.6 |
| <i>eptB</i> | 13.9 | 14.1 | 13.6 | 13.3 | 13.6 | 14.0 | 13.8 | 13.9 |
| <i>era</i>  | 16.2 | 16.1 | 16.0 | 16.1 | 16.0 | 16.3 | 16.1 | 16.4 |
| <i>erfK</i> | 15.0 | 15.0 | 14.6 | 14.7 | 14.7 | 15.2 | 14.8 | 15.0 |
| <i>erpA</i> | 17.6 | 17.0 | 17.3 | 17.1 | 16.5 | 17.0 | 16.3 | 17.2 |
| <i>essD</i> | 13.4 | 13.4 | 13.1 | 13.7 | 13.5 | 13.4 | 13.3 | 13.0 |
| <i>essQ</i> | 13.2 | 13.3 | 13.1 | 14.0 | 13.5 | 13.3 | 13.3 | 13.0 |
| <i>etk</i>  | 13.6 | 13.6 | 13.4 | 13.7 | 13.4 | 13.7 | 13.4 | 13.4 |
| <i>etp</i>  | 13.7 | 13.7 | 13.5 | 13.5 | 13.6 | 13.7 | 13.4 | 13.5 |
| <i>eutA</i> | 12.6 | 12.6 | 12.6 | 12.9 | 12.8 | 12.6 | 12.7 | 12.6 |
| <i>eutB</i> | 14.4 | 14.4 | 14.4 | 14.2 | 14.1 | 14.4 | 14.3 | 14.2 |
| <i>eutC</i> | 14.3 | 14.3 | 14.2 | 14.2 | 13.8 | 14.3 | 14.0 | 13.9 |
| <i>eutD</i> | 12.9 | 12.9 | 12.8 | 13.1 | 12.8 | 12.8 | 12.9 | 12.6 |
| <i>eutE</i> | 12.8 | 12.8 | 12.7 | 13.0 | 12.9 | 12.8 | 12.9 | 12.7 |
| <i>eutG</i> | 12.8 | 12.8 | 12.8 | 13.4 | 13.0 | 12.8 | 13.0 | 12.6 |
| <i>eutH</i> | 12.8 | 12.9 | 12.7 | 12.9 | 13.0 | 12.7 | 13.0 | 12.7 |
| <i>eutJ</i> | 12.7 | 12.8 | 12.7 | 13.0 | 12.9 | 12.7 | 13.1 | 12.6 |
| <i>eutK</i> | 13.6 | 13.7 | 13.6 | 13.3 | 13.5 | 13.7 | 13.6 | 13.4 |
| <i>eutL</i> | 14.3 | 14.3 | 14.1 | 14.0 | 13.8 | 14.3 | 14.0 | 14.0 |
| <i>eutM</i> | 13.2 | 13.3 | 13.2 | 13.2 | 13.3 | 13.1 | 13.3 | 13.0 |
| <i>eutN</i> | 13.1 | 13.1 | 13.0 | 13.8 | 13.1 | 13.0 | 13.0 | 12.8 |
| <i>eutP</i> | 13.0 | 13.0 | 12.8 | 13.3 | 12.9 | 12.8 | 12.9 | 12.7 |
| <i>eutQ</i> | 12.9 | 12.9 | 12.9 | 13.2 | 13.0 | 12.8 | 13.0 | 12.7 |
| <i>eutR</i> | 13.4 | 13.5 | 13.3 | 13.4 | 13.4 | 13.6 | 13.5 | 13.4 |
| <i>eutS</i> | 12.7 | 12.8 | 12.7 | 12.9 | 12.8 | 12.8 | 12.9 | 12.8 |
| <i>eutT</i> | 12.7 | 12.8 | 12.7 | 13.1 | 12.7 | 12.7 | 12.7 | 12.6 |
| <i>evgA</i> | 16.8 | 17.2 | 16.5 | 16.5 | 16.7 | 17.1 | 16.4 | 16.6 |
| <i>evgS</i> | 14.5 | 14.7 | 14.3 | 14.2 | 14.2 | 14.4 | 13.9 | 14.0 |
| <i>exbB</i> | 16.6 | 18.7 | 18.6 | 16.1 | 14.2 | 18.9 | 19.0 | 14.5 |
| <i>exbD</i> | 16.4 | 18.5 | 18.1 | 16.2 | 14.1 | 18.8 | 18.5 | 14.4 |
| <i>exoX</i> | 15.4 | 15.5 | 15.3 | 15.1 | 15.6 | 15.9 | 15.7 | 15.5 |
| <i>exuR</i> | 15.9 | 15.7 | 15.3 | 15.5 | 15.5 | 16.0 | 15.4 | 15.7 |
| <i>exuT</i> | 13.1 | 13.0 | 13.0 | 12.8 | 13.1 | 13.2 | 13.1 | 13.1 |
| <i>fabA</i> | 17.1 | 17.1 | 17.5 | 17.0 | 17.1 | 16.9 | 16.9 | 16.9 |
| <i>fabB</i> | 17.8 | 17.9 | 18.4 | 17.8 | 18.1 | 18.0 | 18.5 | 18.2 |
| <i>fabD</i> | 17.8 | 17.8 | 17.6 | 17.8 | 17.9 | 17.8 | 17.7 | 17.7 |
| <i>fabF</i> | 17.3 | 17.2 | 17.2 | 17.5 | 17.3 | 17.1 | 17.4 | 17.5 |
| <i>fabG</i> | 18.4 | 18.4 | 18.3 | 18.4 | 18.6 | 18.4 | 18.5 | 18.5 |
| <i>fabH</i> | 17.4 | 17.4 | 17.4 | 17.3 | 17.6 | 17.3 | 17.4 | 17.4 |
| <i>fabI</i> | 18.1 | 18.0 | 18.3 | 18.1 | 17.7 | 17.8 | 17.9 | 18.0 |
| <i>fabR</i> | 16.1 | 16.2 | 16.0 | 15.7 | 16.1 | 16.3 | 15.8 | 16.1 |
| <i>fabZ</i> | 18.1 | 17.9 | 17.9 | 17.9 | 18.0 | 18.0 | 18.0 | 18.0 |
| <i>fadA</i> | 13.6 | 13.4 | 13.6 | 13.7 | 12.9 | 12.9 | 13.0 | 12.8 |
| <i>fadB</i> | 14.1 | 13.7 | 13.9 | 13.8 | 13.0 | 12.8 | 12.9 | 12.7 |
| <i>fadD</i> | 14.1 | 13.9 | 14.0 | 14.2 | 13.7 | 13.5 | 13.7 | 13.6 |
| <i>fadE</i> | 13.9 | 13.7 | 13.9 | 13.7 | 12.9 | 12.9 | 12.9 | 12.8 |
| <i>fadH</i> | 13.0 | 12.9 | 13.0 | 13.0 | 12.9 | 12.7 | 12.9 | 12.7 |
| <i>fadI</i> | 13.6 | 13.3 | 13.6 | 13.2 | 12.9 | 12.9 | 12.9 | 12.7 |
| <i>fadJ</i> | 13.9 | 13.8 | 13.8 | 13.6 | 13.1 | 13.2 | 13.1 | 13.1 |
| <i>fadK</i> | 12.8 | 12.8 | 12.7 | 12.8 | 12.9 | 12.9 | 12.9 | 12.8 |
| <i>fadL</i> | 15.1 | 14.7 | 15.0 | 14.8 | 13.4 | 13.7 | 13.4 | 13.5 |
| <i>fadM</i> | 14.0 | 13.8 | 13.7 | 13.6 | 13.5 | 13.5 | 13.3 | 13.3 |
| <i>fadR</i> | 15.2 | 15.1 | 15.0 | 14.9 | 15.1 | 15.3 | 15.0 | 15.2 |
| <i>fbaA</i> | 18.9 | 18.9 | 18.9 | 19.0 | 19.2 | 19.2 | 19.5 | 19.1 |

|             |      |      |      |      |      |      |      |      |
|-------------|------|------|------|------|------|------|------|------|
| <i>fbaB</i> | 17.6 | 17.2 | 17.4 | 17.7 | 17.9 | 17.3 | 17.6 | 17.7 |
| <i>fbp</i>  | 16.9 | 16.8 | 17.0 | 16.9 | 16.3 | 16.4 | 16.3 | 16.3 |
| <i>fcl</i>  | 12.8 | 12.8 | 12.7 | 13.0 | 12.9 | 12.7 | 12.8 | 12.6 |
| <i>fdhD</i> | 14.5 | 14.4 | 14.2 | 14.1 | 14.5 | 14.7 | 14.3 | 14.6 |
| <i>fdhE</i> | 15.3 | 15.2 | 15.0 | 14.8 | 14.8 | 15.3 | 14.9 | 15.1 |
| <i>fdhF</i> | 13.2 | 13.1 | 13.1 | 13.0 | 16.4 | 14.6 | 16.5 | 16.8 |
| <i>fdnG</i> | 13.1 | 12.9 | 12.9 | 13.3 | 13.1 | 13.0 | 13.1 | 12.9 |
| <i>fdnH</i> | 12.8 | 12.8 | 12.7 | 13.1 | 13.0 | 12.9 | 12.9 | 12.7 |
| <i>fdnI</i> | 13.2 | 13.2 | 12.9 | 13.2 | 13.1 | 13.2 | 13.1 | 13.1 |
| <i>fdoG</i> | 15.2 | 14.4 | 15.1 | 15.0 | 13.3 | 13.1 | 13.3 | 13.2 |
| <i>fdoH</i> | 13.8 | 13.6 | 13.7 | 13.5 | 13.2 | 13.1 | 13.2 | 12.9 |
| <i>fdol</i> | 15.0 | 14.8 | 14.6 | 14.7 | 14.2 | 14.7 | 14.1 | 14.2 |
| <i>fdrA</i> | 12.7 | 12.8 | 12.6 | 12.8 | 12.7 | 12.7 | 12.7 | 12.6 |
| <i>fdx</i>  | 17.3 | 16.1 | 17.0 | 17.0 | 16.3 | 15.7 | 16.5 | 16.4 |
| <i>feaB</i> | 13.5 | 13.5 | 13.4 | 13.6 | 13.4 | 13.3 | 13.2 | 13.2 |
| <i>feaR</i> | 13.7 | 13.5 | 13.4 | 13.4 | 13.0 | 12.9 | 12.8 | 12.8 |
| <i>fecA</i> | 13.3 | 15.6 | 15.4 | 13.3 | 13.4 | 17.7 | 15.9 | 12.8 |
| <i>fecB</i> | 13.8 | 15.2 | 15.1 | 13.9 | 13.5 | 17.2 | 15.5 | 13.2 |
| <i>fecC</i> | 12.9 | 13.9 | 14.1 | 13.1 | 12.9 | 15.3 | 14.3 | 12.8 |
| <i>fecD</i> | 13.2 | 14.1 | 14.1 | 13.2 | 13.1 | 15.2 | 14.0 | 12.9 |
| <i>fecE</i> | 13.5 | 14.6 | 14.6 | 13.7 | 13.2 | 15.7 | 14.6 | 13.2 |
| <i>fecI</i> | 14.5 | 17.9 | 17.7 | 14.0 | 13.4 | 18.2 | 17.9 | 13.6 |
| <i>fecR</i> | 13.3 | 15.9 | 16.1 | 13.1 | 12.9 | 15.9 | 16.3 | 12.8 |
| <i>feoA</i> | 16.0 | 17.2 | 16.9 | 15.4 | 15.8 | 19.7 | 19.9 | 16.0 |
| <i>feoB</i> | 14.6 | 15.8 | 15.8 | 14.2 | 14.5 | 18.6 | 19.1 | 14.8 |
| <i>feoC</i> | 14.0 | 14.9 | 15.3 | 13.9 | 14.1 | 17.9 | 18.4 | 14.4 |
| <i>fepA</i> | 13.4 | 19.4 | 19.4 | 14.7 | 13.2 | 19.2 | 19.3 | 12.8 |
| <i>fepB</i> | 13.9 | 16.3 | 16.7 | 13.4 | 13.1 | 16.5 | 16.8 | 12.9 |
| <i>fepC</i> | 13.3 | 15.7 | 15.6 | 13.0 | 12.8 | 15.8 | 15.6 | 12.6 |
| <i>fepD</i> | 12.9 | 14.7 | 15.0 | 12.8 | 12.9 | 14.9 | 15.0 | 12.9 |
| <i>fepE</i> | 12.7 | 13.4 | 13.2 | 13.3 | 12.8 | 13.1 | 12.9 | 12.6 |
| <i>fepG</i> | 13.1 | 15.0 | 15.2 | 13.2 | 12.9 | 15.3 | 15.1 | 12.7 |
| <i>fes</i>  | 12.9 | 17.5 | 17.5 | 13.1 | 12.7 | 17.4 | 17.3 | 12.6 |
| <i>ffh</i>  | 16.5 | 16.4 | 16.2 | 16.4 | 16.4 | 16.3 | 16.2 | 16.3 |
| <i>ffs</i>  | 17.7 | 17.7 | 18.7 | 17.5 | 18.2 | 17.4 | 17.1 | 17.8 |
| <i>fhlA</i> | 13.7 | 13.4 | 13.5 | 13.4 | 13.9 | 13.6 | 14.1 | 14.1 |
| <i>fhuA</i> | 15.3 | 16.9 | 16.7 | 14.8 | 13.3 | 17.2 | 17.1 | 13.4 |
| <i>fhuB</i> | 13.1 | 13.7 | 13.9 | 13.7 | 13.1 | 13.8 | 14.1 | 12.8 |
| <i>fhuC</i> | 13.8 | 15.0 | 14.9 | 13.7 | 13.2 | 15.2 | 15.1 | 13.1 |
| <i>fhuD</i> | 13.7 | 14.9 | 14.6 | 13.5 | 13.0 | 14.9 | 14.8 | 13.1 |
| <i>fhuE</i> | 13.1 | 17.2 | 16.6 | 13.0 | 13.0 | 17.5 | 17.1 | 12.8 |
| <i>fhuF</i> | 15.8 | 18.6 | 18.4 | 15.4 | 13.1 | 18.7 | 18.8 | 13.2 |
| <i>fic</i>  | 14.7 | 14.9 | 14.4 | 14.2 | 14.6 | 14.5 | 14.2 | 14.5 |
| <i>fieF</i> | 15.9 | 15.9 | 15.6 | 15.8 | 16.3 | 16.0 | 15.9 | 16.1 |
| <i>fimA</i> | 18.8 | 19.4 | 18.9 | 18.7 | 19.4 | 19.6 | 19.5 | 19.2 |
| <i>fimB</i> | 15.6 | 15.3 | 15.2 | 15.3 | 15.6 | 16.1 | 15.4 | 15.2 |
| <i>fimC</i> | 15.8 | 16.8 | 15.7 | 15.5 | 16.7 | 17.4 | 16.5 | 16.0 |
| <i>fimD</i> | 14.0 | 15.0 | 14.0 | 13.7 | 14.6 | 15.4 | 14.6 | 14.2 |
| <i>fimE</i> | 13.6 | 13.3 | 13.4 | 13.4 | 13.5 | 13.2 | 13.2 | 12.8 |
| <i>fimF</i> | 14.4 | 15.3 | 14.3 | 14.0 | 14.8 | 15.7 | 14.9 | 14.6 |
| <i>fimG</i> | 13.9 | 14.8 | 14.0 | 14.1 | 14.7 | 15.2 | 14.7 | 14.3 |
| <i>fimH</i> | 14.2 | 15.1 | 14.3 | 13.7 | 14.8 | 15.5 | 14.8 | 14.6 |
| <i>fimI</i> | 16.1 | 17.2 | 16.3 | 15.9 | 17.4 | 17.7 | 17.2 | 16.6 |
| <i>fimZ</i> | 12.8 | 12.8 | 12.6 | 13.0 | 12.9 | 13.1 | 12.6 | 12.7 |
| <i>fis</i>  | 18.8 | 18.6 | 18.4 | 18.7 | 18.7 | 18.6 | 18.7 | 18.5 |
| <i>fiu</i>  | 13.4 | 19.0 | 19.4 | 13.1 | 12.7 | 14.4 | 13.8 | 12.6 |
| <i>fixA</i> | 12.9 | 12.9 | 12.8 | 13.2 | 12.9 | 12.9 | 12.9 | 12.8 |
| <i>fixB</i> | 12.7 | 12.7 | 12.7 | 13.0 | 12.9 | 12.7 | 12.8 | 12.6 |
| <i>fixC</i> | 12.7 | 12.8 | 12.7 | 13.0 | 12.8 | 12.8 | 12.9 | 12.8 |
| <i>fixX</i> | 13.0 | 12.9 | 12.9 | 14.8 | 13.2 | 12.9 | 13.1 | 12.9 |
| <i>flbB</i> | 17.1 | 17.0 | 17.1 | 16.8 | 17.0 | 16.8 | 16.7 | 16.6 |

|             |      |      |      |      |      |      |      |      |
|-------------|------|------|------|------|------|------|------|------|
| <i>fkpA</i> | 17.2 | 17.1 | 16.8 | 17.0 | 17.0 | 17.1 | 16.6 | 17.0 |
| <i>fkpB</i> | 16.6 | 16.5 | 16.7 | 16.5 | 16.7 | 16.8 | 16.9 | 16.7 |
| <i>fldA</i> | 18.2 | 18.2 | 18.0 | 18.1 | 17.8 | 17.9 | 17.6 | 17.8 |
| <i>fldB</i> | 15.7 | 15.8 | 15.4 | 15.3 | 15.5 | 15.7 | 15.3 | 15.8 |
| <i>flgA</i> | 13.7 | 14.3 | 13.9 | 13.8 | 13.5 | 14.1 | 13.6 | 13.3 |
| <i>flgB</i> | 14.0 | 15.1 | 14.4 | 13.9 | 13.4 | 14.9 | 13.9 | 13.0 |
| <i>flgC</i> | 14.0 | 15.1 | 14.3 | 13.9 | 13.6 | 14.8 | 13.9 | 12.9 |
| <i>flgD</i> | 13.9 | 14.9 | 14.3 | 14.1 | 13.3 | 14.7 | 14.2 | 13.0 |
| <i>flgE</i> | 14.1 | 15.1 | 14.6 | 14.1 | 13.5 | 14.9 | 14.0 | 13.2 |
| <i>flgF</i> | 13.4 | 14.1 | 13.7 | 13.6 | 13.3 | 13.8 | 13.5 | 12.8 |
| <i>flgG</i> | 13.7 | 14.5 | 14.0 | 13.4 | 13.3 | 14.1 | 13.7 | 13.1 |
| <i>flgH</i> | 13.1 | 13.6 | 13.2 | 13.0 | 12.9 | 13.4 | 13.0 | 12.8 |
| <i>flgI</i> | 13.1 | 13.4 | 13.2 | 13.2 | 13.3 | 13.2 | 13.1 | 12.8 |
| <i>flgJ</i> | 13.1 | 13.4 | 13.1 | 13.0 | 13.0 | 13.3 | 13.0 | 12.8 |
| <i>flgK</i> | 13.2 | 13.5 | 13.1 | 13.2 | 13.2 | 13.5 | 13.6 | 12.9 |
| <i>flgL</i> | 13.5 | 13.9 | 13.4 | 13.4 | 13.3 | 13.9 | 13.3 | 13.3 |
| <i>flgM</i> | 14.5 | 14.9 | 14.2 | 14.0 | 14.0 | 14.9 | 14.1 | 14.2 |
| <i>flgN</i> | 14.0 | 14.3 | 13.7 | 13.6 | 13.7 | 14.3 | 13.7 | 13.7 |
| <i>flhA</i> | 13.0 | 13.2 | 12.9 | 13.1 | 13.1 | 13.1 | 13.1 | 12.9 |
| <i>flhB</i> | 12.9 | 13.1 | 12.9 | 13.2 | 12.9 | 13.0 | 13.0 | 12.7 |
| <i>flhC</i> | 15.0 | 15.3 | 14.9 | 14.6 | 14.6 | 15.3 | 14.5 | 14.6 |
| <i>flhD</i> | 15.6 | 15.9 | 15.4 | 15.1 | 15.3 | 16.0 | 15.2 | 15.3 |
| <i>flhE</i> | 12.9 | 12.9 | 12.8 | 12.8 | 12.9 | 12.9 | 12.9 | 12.8 |
| <i>fliA</i> | 13.4 | 14.4 | 13.8 | 13.6 | 13.3 | 14.3 | 13.5 | 12.9 |
| <i>fliC</i> | 14.2 | 15.6 | 14.3 | 14.3 | 14.3 | 15.9 | 14.6 | 14.2 |
| <i>fliD</i> | 13.2 | 13.7 | 13.2 | 13.3 | 13.1 | 13.8 | 13.2 | 12.9 |
| <i>fliE</i> | 13.3 | 13.7 | 13.4 | 13.5 | 13.5 | 13.6 | 13.3 | 13.0 |
| <i>fliF</i> | 13.0 | 13.4 | 13.1 | 13.0 | 12.9 | 13.2 | 12.9 | 12.7 |
| <i>fliG</i> | 13.1 | 13.7 | 13.2 | 13.2 | 13.0 | 13.5 | 13.1 | 12.9 |
| <i>fliH</i> | 13.1 | 13.4 | 13.3 | 13.4 | 13.1 | 13.3 | 13.2 | 12.9 |
| <i>fliI</i> | 12.9 | 13.1 | 12.9 | 13.2 | 12.9 | 13.0 | 12.9 | 12.6 |
| <i>fliJ</i> | 13.2 | 13.5 | 13.2 | 13.2 | 16.3 | 13.5 | 13.1 | 12.8 |
| <i>fliK</i> | 13.1 | 13.4 | 13.1 | 13.2 | 13.0 | 13.3 | 13.0 | 12.7 |
| <i>fliL</i> | 13.4 | 14.1 | 13.6 | 13.4 | 13.1 | 14.0 | 13.2 | 12.9 |
| <i>fliM</i> | 13.2 | 13.7 | 13.4 | 13.2 | 13.1 | 13.4 | 13.1 | 12.7 |
| <i>fliN</i> | 13.3 | 13.8 | 13.4 | 13.5 | 13.0 | 13.5 | 13.2 | 12.8 |
| <i>fliO</i> | 13.1 | 13.4 | 13.2 | 13.5 | 13.1 | 13.1 | 13.1 | 12.9 |
| <i>fliP</i> | 12.9 | 13.0 | 12.9 | 13.0 | 12.9 | 12.9 | 12.9 | 12.7 |
| <i>fliQ</i> | 13.1 | 13.2 | 13.1 | 12.8 | 13.0 | 13.1 | 13.0 | 13.2 |
| <i>fliR</i> | 12.7 | 12.8 | 12.7 | 12.7 | 12.7 | 12.8 | 12.6 | 12.6 |
| <i>fliS</i> | 13.3 | 13.8 | 13.2 | 13.0 | 13.2 | 13.7 | 13.3 | 13.2 |
| <i>fliT</i> | 13.3 | 13.5 | 13.0 | 13.5 | 13.5 | 13.4 | 13.2 | 13.0 |
| <i>fliY</i> | 18.5 | 18.6 | 18.2 | 18.3 | 18.5 | 18.7 | 18.2 | 18.2 |
| <i>fliZ</i> | 13.9 | 14.6 | 13.9 | 13.7 | 13.6 | 14.6 | 13.6 | 13.7 |
| <i>flk</i>  | 14.5 | 14.5 | 14.4 | 14.1 | 14.3 | 14.5 | 14.3 | 14.2 |
| <i>flu</i>  | 15.7 | 14.8 | 15.1 | 15.8 | 15.5 | 14.4 | 14.8 | 13.9 |
| <i>flxA</i> | 13.8 | 13.9 | 13.4 | 14.0 | 13.3 | 13.8 | 13.2 | 13.1 |
| <i>fnt</i>  | 16.3 | 16.2 | 16.1 | 16.2 | 16.1 | 16.4 | 16.2 | 16.2 |
| <i>fnr</i>  | 17.9 | 18.1 | 17.8 | 17.6 | 17.0 | 17.6 | 16.9 | 17.2 |
| <i>fnrS</i> | 14.8 | 14.4 | 13.9 | 13.5 | 19.3 | 19.6 | 18.8 | 19.4 |
| <i>focA</i> | 16.2 | 16.1 | 16.0 | 16.0 | 18.4 | 18.4 | 18.4 | 18.4 |
| <i>focB</i> | 13.1 | 13.1 | 13.0 | 13.0 | 13.1 | 13.3 | 13.1 | 13.1 |
| <i>folA</i> | 15.8 | 15.8 | 15.5 | 15.2 | 15.0 | 15.3 | 14.8 | 15.0 |
| <i>folB</i> | 15.2 | 15.1 | 14.7 | 14.7 | 15.0 | 14.9 | 14.4 | 14.6 |
| <i>folC</i> | 15.7 | 15.6 | 15.4 | 15.4 | 15.3 | 15.4 | 15.1 | 15.2 |
| <i>folD</i> | 17.1 | 17.1 | 16.8 | 16.8 | 16.9 | 17.1 | 16.9 | 16.8 |
| <i>folE</i> | 18.9 | 19.3 | 19.0 | 18.9 | 17.5 | 18.3 | 17.7 | 17.7 |
| <i>folK</i> | 14.8 | 14.9 | 14.6 | 14.5 | 14.5 | 14.8 | 14.6 | 14.6 |
| <i>folM</i> | 14.5 | 14.5 | 14.1 | 14.0 | 14.4 | 14.9 | 14.6 | 14.6 |
| <i>folP</i> | 15.9 | 15.8 | 15.7 | 15.7 | 15.8 | 15.9 | 15.6 | 15.7 |
| <i>folX</i> | 17.7 | 17.5 | 17.4 | 17.7 | 16.3 | 16.8 | 16.2 | 16.4 |

|             |      |      |      |      |      |      |      |      |
|-------------|------|------|------|------|------|------|------|------|
| <i>fpr</i>  | 15.9 | 16.2 | 16.1 | 15.7 | 15.5 | 15.7 | 15.6 | 15.6 |
| <i>frc</i>  | 13.0 | 13.1 | 12.9 | 13.3 | 12.9 | 13.0 | 12.8 | 12.8 |
| <i>frdA</i> | 14.6 | 13.6 | 14.5 | 14.5 | 17.1 | 15.9 | 17.4 | 17.2 |
| <i>frdB</i> | 14.6 | 13.6 | 14.3 | 14.4 | 16.7 | 15.8 | 17.2 | 17.2 |
| <i>frdC</i> | 14.3 | 13.4 | 14.0 | 14.0 | 16.4 | 15.4 | 16.8 | 16.7 |
| <i>frdD</i> | 13.7 | 13.1 | 13.7 | 13.4 | 15.6 | 14.7 | 16.3 | 16.2 |
| <i>fre</i>  | 16.6 | 16.6 | 16.3 | 16.5 | 16.5 | 16.6 | 16.3 | 16.4 |
| <i>frlA</i> | 12.5 | 12.6 | 12.5 | 12.9 | 12.6 | 12.5 | 12.5 | 12.5 |
| <i>frlB</i> | 12.8 | 12.8 | 12.8 | 12.9 | 12.9 | 12.9 | 12.8 | 12.7 |
| <i>frlC</i> | 13.1 | 13.0 | 13.0 | 13.3 | 13.2 | 13.1 | 13.2 | 13.0 |
| <i>frlD</i> | 13.1 | 13.0 | 13.0 | 13.0 | 13.1 | 13.1 | 13.2 | 13.0 |
| <i>frlR</i> | 14.8 | 14.8 | 14.6 | 14.4 | 14.6 | 15.1 | 14.7 | 14.8 |
| <i>frmA</i> | 15.6 | 15.3 | 15.4 | 15.5 | 15.0 | 15.5 | 15.1 | 15.0 |
| <i>frmB</i> | 14.4 | 14.2 | 13.9 | 14.3 | 13.6 | 14.3 | 14.2 | 13.8 |
| <i>frmR</i> | 16.0 | 15.8 | 15.8 | 16.0 | 15.6 | 15.8 | 15.4 | 15.4 |
| <i>frr</i>  | 18.4 | 18.2 | 18.0 | 18.5 | 18.0 | 18.0 | 17.8 | 18.2 |
| <i>frsA</i> | 14.9 | 15.0 | 14.9 | 14.5 | 14.9 | 15.1 | 15.0 | 15.1 |
| <i>fruA</i> | 14.5 | 14.5 | 14.1 | 14.3 | 14.8 | 15.2 | 15.3 | 15.1 |
| <i>fruB</i> | 14.2 | 14.1 | 13.6 | 14.0 | 14.4 | 15.0 | 15.0 | 14.7 |
| <i>fruK</i> | 14.6 | 14.6 | 14.1 | 14.4 | 14.9 | 15.2 | 15.3 | 15.0 |
| <i>fruL</i> | 16.3 | 16.1 | 15.3 | 16.5 | 15.6 | 16.3 | 15.4 | 15.7 |
| <i>fruR</i> | 15.6 | 15.4 | 15.5 | 15.4 | 16.4 | 16.0 | 16.4 | 16.4 |
| <i>frvA</i> | 12.9 | 12.8 | 12.7 | 13.8 | 13.0 | 12.9 | 12.8 | 12.9 |
| <i>frvB</i> | 12.7 | 12.8 | 12.7 | 13.4 | 12.9 | 12.7 | 12.8 | 12.7 |
| <i>frvR</i> | 12.8 | 12.8 | 12.6 | 13.2 | 12.7 | 12.8 | 12.7 | 12.7 |
| <i>frvX</i> | 13.1 | 13.2 | 13.0 | 13.1 | 13.0 | 13.0 | 13.0 | 12.9 |
| <i>frwB</i> | 13.4 | 13.4 | 13.1 | 14.1 | 13.8 | 13.2 | 13.3 | 12.8 |
| <i>frwC</i> | 12.7 | 12.8 | 12.7 | 14.4 | 13.0 | 12.8 | 12.9 | 12.6 |
| <i>frwD</i> | 13.0 | 12.9 | 12.8 | 13.2 | 13.2 | 12.8 | 13.0 | 12.8 |
| <i>fryA</i> | 12.7 | 12.8 | 12.7 | 13.2 | 13.0 | 12.8 | 12.9 | 12.7 |
| <i>fryB</i> | 12.9 | 12.8 | 12.6 | 13.0 | 12.8 | 12.8 | 12.8 | 12.6 |
| <i>fryC</i> | 12.6 | 12.6 | 12.6 | 12.8 | 12.6 | 12.6 | 12.6 | 12.6 |
| <i>fsaA</i> | 14.0 | 14.0 | 13.5 | 13.9 | 14.0 | 14.2 | 13.9 | 13.9 |
| <i>fsaB</i> | 13.4 | 13.2 | 13.1 | 13.1 | 14.4 | 14.6 | 14.2 | 14.2 |
| <i>fsr</i>  | 13.9 | 14.3 | 14.0 | 13.8 | 13.5 | 13.7 | 13.5 | 13.4 |
| <i>ftnA</i> | 18.0 | 15.9 | 15.4 | 18.0 | 19.0 | 16.1 | 15.2 | 18.8 |
| <i>ftnB</i> | 15.5 | 14.4 | 14.8 | 15.2 | 15.2 | 15.4 | 15.1 | 15.5 |
| <i>ftsA</i> | 16.6 | 16.7 | 16.3 | 16.6 | 16.8 | 16.7 | 16.4 | 16.6 |
| <i>ftsB</i> | 16.4 | 16.4 | 16.3 | 16.4 | 16.5 | 16.3 | 16.0 | 16.4 |
| <i>ftsE</i> | 15.4 | 15.4 | 15.6 | 15.2 | 15.8 | 15.5 | 15.7 | 15.6 |
| <i>ftsH</i> | 17.1 | 17.2 | 17.0 | 17.1 | 17.3 | 17.2 | 17.1 | 17.2 |
| <i>ftsI</i> | 15.7 | 15.7 | 15.7 | 15.1 | 15.9 | 15.9 | 15.4 | 15.8 |
| <i>ftsK</i> | 16.1 | 16.3 | 16.0 | 15.9 | 15.8 | 16.5 | 16.0 | 16.1 |
| <i>ftsL</i> | 16.5 | 16.4 | 16.1 | 16.3 | 16.4 | 16.7 | 16.1 | 16.5 |
| <i>ftsN</i> | 15.7 | 15.8 | 15.6 | 15.9 | 15.6 | 16.0 | 15.6 | 15.6 |
| <i>ftsP</i> | 14.9 | 14.6 | 14.8 | 14.6 | 14.9 | 14.6 | 15.0 | 15.0 |
| <i>ftsQ</i> | 16.1 | 16.2 | 15.9 | 15.9 | 16.5 | 16.2 | 15.9 | 16.1 |
| <i>ftsW</i> | 15.1 | 15.0 | 15.1 | 14.7 | 15.2 | 15.2 | 15.1 | 15.4 |
| <i>ftsX</i> | 15.3 | 15.3 | 15.3 | 15.3 | 15.4 | 15.4 | 15.5 | 15.8 |
| <i>ftsY</i> | 16.2 | 16.1 | 16.0 | 16.0 | 16.2 | 16.2 | 15.9 | 16.1 |
| <i>ftsZ</i> | 17.7 | 17.8 | 17.8 | 17.9 | 18.4 | 17.8 | 18.1 | 18.1 |
| <i>fucA</i> | 13.5 | 13.4 | 13.3 | 13.4 | 13.5 | 13.6 | 13.4 | 13.3 |
| <i>fucI</i> | 13.0 | 13.0 | 13.0 | 13.3 | 12.9 | 12.9 | 12.9 | 12.7 |
| <i>fucK</i> | 14.0 | 13.9 | 13.8 | 13.7 | 13.9 | 13.9 | 13.6 | 13.7 |
| <i>fucO</i> | 13.6 | 13.4 | 13.6 | 13.4 | 13.8 | 13.7 | 13.9 | 13.8 |
| <i>fucP</i> | 12.7 | 12.7 | 12.6 | 12.8 | 12.8 | 12.7 | 12.6 | 12.6 |
| <i>fucR</i> | 14.9 | 14.9 | 14.7 | 14.6 | 14.6 | 15.1 | 14.6 | 14.7 |
| <i>fucU</i> | 15.3 | 15.3 | 15.1 | 14.9 | 15.3 | 15.3 | 15.1 | 15.2 |
| <i>fumA</i> | 17.3 | 15.0 | 17.2 | 17.4 | 13.8 | 13.5 | 13.8 | 14.1 |
| <i>fumB</i> | 13.2 | 12.8 | 13.2 | 13.5 | 15.7 | 15.4 | 15.7 | 15.7 |
| <i>fumC</i> | 15.3 | 14.3 | 15.4 | 15.3 | 13.2 | 13.0 | 13.3 | 13.2 |

|               |      |      |      |      |      |      |      |      |
|---------------|------|------|------|------|------|------|------|------|
| <i>fur</i>    | 18.4 | 14.0 | 13.8 | 18.3 | 17.6 | 14.1 | 13.6 | 17.8 |
| <i>fusA</i>   | 19.8 | 19.8 | 20.1 | 20.0 | 19.9 | 19.6 | 19.9 | 19.8 |
| <i>fxsA</i>   | 15.3 | 15.2 | 15.1 | 15.0 | 15.1 | 15.3 | 14.9 | 15.1 |
| <i>G6084</i>  | 13.0 | 13.0 | 12.9 | 12.7 | 12.7 | 13.0 | 12.9 | 13.1 |
| <i>G6272</i>  | 13.3 | 13.2 | 13.0 | 13.3 | 13.5 | 13.4 | 13.1 | 13.1 |
| <i>G6294</i>  | 12.9 | 12.9 | 12.7 | 13.1 | 12.9 | 12.9 | 12.8 | 12.9 |
| <i>G6336</i>  | 13.6 | 13.5 | 13.2 | 13.5 | 13.2 | 13.5 | 13.2 | 13.5 |
| <i>G6678</i>  | 13.2 | 13.4 | 13.2 | 13.2 | 13.2 | 13.4 | 13.2 | 13.3 |
| <i>G6690</i>  | 13.1 | 13.1 | 12.9 | 13.7 | 13.1 | 13.4 | 13.0 | 12.9 |
| <i>G6740</i>  | 12.8 | 13.0 | 12.8 | 13.0 | 12.9 | 12.9 | 12.9 | 13.0 |
| <i>G6748</i>  | 12.9 | 12.9 | 12.7 | 12.9 | 12.8 | 12.7 | 12.7 | 12.9 |
| <i>G7034</i>  | 12.8 | 12.8 | 12.8 | 12.9 | 13.0 | 12.8 | 12.7 | 12.8 |
| <i>G7121</i>  | 13.4 | 13.3 | 13.1 | 13.9 | 13.2 | 13.4 | 13.1 | 13.0 |
| <i>G7353</i>  | 13.9 | 13.9 | 13.6 | 13.5 | 13.8 | 13.5 | 13.3 | 13.1 |
| <i>G7388</i>  | 13.0 | 13.2 | 13.0 | 13.2 | 13.2 | 13.1 | 13.0 | 12.9 |
| <i>G7561</i>  | 13.2 | 13.5 | 13.3 | 13.4 | 13.0 | 13.2 | 13.0 | 12.9 |
| <i>G7562</i>  | 14.6 | 16.2 | 16.0 | 14.5 | 13.6 | 16.8 | 16.3 | 13.4 |
| <i>G7818</i>  | 13.4 | 13.3 | 13.1 | 13.4 | 13.3 | 13.4 | 13.1 | 13.2 |
| <i>G7881</i>  | 15.5 | 15.4 | 14.8 | 14.9 | 14.6 | 15.4 | 14.6 | 14.8 |
| <i>gabD</i>   | 14.8 | 14.7 | 14.5 | 14.7 | 14.1 | 14.0 | 14.0 | 14.2 |
| <i>gabP</i>   | 13.9 | 13.6 | 13.7 | 13.4 | 13.1 | 13.0 | 13.0 | 13.1 |
| <i>gabT</i>   | 14.5 | 14.4 | 14.4 | 14.4 | 13.8 | 13.8 | 13.9 | 13.9 |
| <i>gadA</i>   | 17.0 | 17.2 | 16.8 | 17.0 | 19.0 | 18.6 | 18.8 | 19.3 |
| <i>gadB</i>   | 17.1 | 17.3 | 16.9 | 17.3 | 19.2 | 18.7 | 18.9 | 19.3 |
| <i>gadC</i>   | 16.3 | 16.6 | 16.0 | 16.5 | 18.7 | 18.3 | 18.6 | 19.1 |
| <i>gadE</i>   | 15.8 | 16.0 | 15.2 | 15.6 | 18.7 | 17.9 | 17.8 | 18.5 |
| <i>gadW</i>   | 16.3 | 16.0 | 15.1 | 16.3 | 17.1 | 16.9 | 16.9 | 17.3 |
| <i>gadX</i>   | 17.0 | 16.9 | 16.0 | 16.8 | 17.8 | 17.7 | 17.4 | 17.9 |
| <i>gadY</i>   | 14.5 | 14.3 | 14.0 | 13.8 | 15.6 | 15.5 | 14.4 | 15.5 |
| <i>galE</i>   | 15.6 | 15.7 | 15.5 | 15.6 | 15.0 | 15.1 | 14.9 | 15.0 |
| <i>galF</i>   | 17.8 | 17.6 | 17.6 | 17.7 | 17.6 | 17.5 | 17.6 | 17.6 |
| <i>galK</i>   | 15.7 | 15.8 | 16.0 | 15.5 | 15.7 | 15.7 | 15.6 | 15.2 |
| <i>galM</i>   | 16.5 | 16.6 | 16.9 | 17.1 | 16.4 | 16.7 | 16.9 | 16.6 |
| <i>galP</i>   | 15.1 | 15.0 | 14.7 | 14.9 | 14.5 | 14.6 | 14.6 | 14.7 |
| <i>galR</i>   | 14.7 | 14.6 | 14.3 | 14.4 | 14.6 | 14.9 | 14.6 | 14.8 |
| <i>galS</i>   | 13.3 | 13.2 | 13.1 | 13.4 | 13.1 | 13.0 | 13.0 | 12.8 |
| <i>galT</i>   | 15.1 | 15.1 | 15.1 | 15.0 | 14.3 | 14.8 | 14.5 | 14.4 |
| <i>galU</i>   | 17.5 | 17.4 | 17.0 | 17.6 | 17.1 | 17.3 | 16.9 | 17.3 |
| <i>gapA</i>   | 19.8 | 19.7 | 19.9 | 19.8 | 20.1 | 20.1 | 20.2 | 20.0 |
| <i>gapC_1</i> | 17.5 | 17.6 | 16.9 | 17.3 | 18.2 | 18.1 | 17.9 | 18.0 |
| <i>gapC_2</i> | 16.5 | 16.6 | 15.5 | 16.6 | 17.0 | 17.4 | 16.8 | 17.0 |
| <i>garD</i>   | 13.5 | 13.5 | 13.2 | 13.7 | 14.0 | 13.9 | 13.7 | 13.7 |
| <i>garK</i>   | 13.6 | 13.9 | 13.4 | 13.6 | 13.7 | 13.6 | 13.6 | 13.5 |
| <i>garL</i>   | 13.1 | 13.0 | 12.9 | 12.9 | 13.1 | 13.1 | 13.0 | 12.8 |
| <i>garP</i>   | 12.8 | 12.8 | 12.7 | 13.6 | 12.9 | 12.8 | 12.9 | 12.6 |
| <i>garR</i>   | 13.7 | 13.5 | 13.5 | 13.5 | 13.7 | 13.6 | 13.6 | 13.5 |
| <i>gatA</i>   | 19.6 | 19.2 | 19.6 | 19.7 | 19.7 | 19.4 | 19.7 | 19.5 |
| <i>gatB</i>   | 19.7 | 19.1 | 19.7 | 19.6 | 19.6 | 19.5 | 19.7 | 19.5 |
| <i>gatC</i>   | 19.1 | 18.6 | 19.5 | 19.2 | 19.4 | 18.8 | 19.5 | 19.1 |
| <i>gatD</i>   | 18.2 | 17.9 | 18.2 | 18.4 | 18.3 | 18.2 | 18.4 | 18.1 |
| <i>gatR_1</i> | 12.9 | 12.8 | 12.7 | 13.0 | 12.8 | 13.0 | 12.7 | 12.8 |
| <i>gatR_2</i> | 16.4 | 16.2 | 16.2 | 16.4 | 16.7 | 16.7 | 16.6 | 16.6 |
| <i>gatY</i>   | 19.4 | 19.2 | 19.7 | 19.4 | 19.8 | 19.4 | 19.8 | 19.5 |
| <i>gatZ</i>   | 19.7 | 19.5 | 20.0 | 19.8 | 20.0 | 19.7 | 20.0 | 19.7 |
| <i>gcd</i>    | 15.8 | 16.3 | 15.5 | 15.8 | 13.1 | 13.5 | 13.2 | 13.4 |
| <i>gcl</i>    | 12.8 | 12.8 | 12.7 | 13.0 | 12.8 | 12.8 | 13.5 | 12.8 |
| <i>gcp</i>    | 15.0 | 14.9 | 14.9 | 14.5 | 14.7 | 14.7 | 14.7 | 14.8 |
| <i>gcvA</i>   | 15.2 | 15.1 | 14.9 | 14.6 | 15.1 | 15.5 | 15.0 | 15.2 |
| <i>gcvB</i>   | 15.5 | 15.1 | 14.6 | 15.2 | 14.1 | 14.7 | 13.8 | 14.6 |
| <i>gcvH</i>   | 18.1 | 17.4 | 17.4 | 18.0 | 16.2 | 15.7 | 15.9 | 16.2 |
| <i>gcvP</i>   | 16.2 | 16.1 | 15.9 | 16.3 | 14.4 | 14.6 | 14.7 | 14.8 |



|             |      |      |      |      |      |      |      |      |
|-------------|------|------|------|------|------|------|------|------|
| <i>gcvR</i> | 17.6 | 17.6 | 17.2 | 17.3 | 17.5 | 18.0 | 17.3 | 17.5 |
| <i>gcvT</i> | 16.9 | 16.6 | 16.4 | 16.8 | 14.9 | 15.0 | 14.8 | 15.0 |
| <i>gdhA</i> | 18.5 | 19.2 | 19.2 | 18.5 | 18.6 | 18.9 | 18.8 | 18.7 |
| <i>gfcA</i> | 13.8 | 13.8 | 13.6 | 14.2 | 13.7 | 13.9 | 13.8 | 13.9 |
| <i>gfcB</i> | 12.9 | 13.0 | 12.8 | 13.1 | 12.9 | 13.1 | 12.9 | 12.8 |
| <i>gfcC</i> | 12.9 | 12.9 | 12.9 | 13.1 | 13.2 | 13.0 | 12.9 | 12.7 |
| <i>gfcD</i> | 12.9 | 12.9 | 12.8 | 13.1 | 13.0 | 12.8 | 12.9 | 12.7 |
| <i>gfcE</i> | 13.4 | 13.3 | 13.1 | 13.0 | 13.1 | 13.4 | 13.1 | 13.0 |
| <i>ggt</i>  | 14.9 | 14.8 | 14.7 | 14.8 | 14.1 | 14.1 | 13.8 | 14.0 |
| <i>ghrA</i> | 16.7 | 16.6 | 16.4 | 16.9 | 16.0 | 16.2 | 15.9 | 16.0 |
| <i>ghrB</i> | 17.5 | 17.6 | 17.3 | 17.4 | 16.6 | 17.1 | 16.7 | 16.7 |
| <i>glcA</i> | 13.2 | 13.1 | 13.2 | 13.1 | 12.9 | 12.9 | 12.9 | 12.7 |
| <i>glcB</i> | 15.0 | 14.8 | 14.8 | 15.1 | 14.3 | 14.4 | 14.3 | 14.4 |
| <i>glcC</i> | 14.8 | 14.6 | 14.3 | 14.8 | 13.0 | 12.9 | 12.9 | 12.9 |
| <i>glcD</i> | 13.2 | 13.0 | 13.1 | 13.2 | 13.2 | 12.9 | 13.0 | 12.8 |
| <i>glcE</i> | 13.2 | 12.9 | 13.0 | 13.1 | 13.1 | 12.8 | 12.9 | 12.7 |
| <i>glcF</i> | 13.8 | 13.5 | 13.4 | 13.6 | 13.4 | 13.4 | 13.3 | 13.2 |
| <i>glcG</i> | 15.4 | 15.2 | 14.9 | 15.0 | 14.8 | 14.7 | 14.3 | 14.5 |
| <i>gldA</i> | 13.4 | 13.3 | 13.2 | 13.4 | 15.9 | 15.9 | 16.0 | 16.3 |
| <i>glf</i>  | 17.1 | 16.9 | 16.5 | 17.0 | 17.2 | 16.8 | 16.4 | 16.5 |
| <i>glgA</i> | 16.7 | 16.6 | 16.6 | 16.7 | 16.8 | 16.5 | 16.8 | 16.7 |
| <i>glgB</i> | 17.2 | 16.9 | 17.1 | 17.2 | 17.2 | 16.9 | 17.3 | 17.1 |
| <i>glgC</i> | 17.0 | 16.9 | 16.8 | 17.1 | 17.0 | 16.7 | 17.0 | 17.0 |
| <i>glgP</i> | 16.2 | 16.2 | 15.9 | 16.3 | 16.1 | 16.1 | 16.1 | 16.3 |
| <i>glgS</i> | 17.5 | 17.4 | 16.9 | 16.9 | 17.7 | 18.0 | 16.8 | 17.9 |
| <i>glgX</i> | 16.2 | 16.0 | 16.0 | 16.2 | 16.2 | 16.0 | 16.1 | 16.1 |
| <i>glk</i>  | 15.7 | 15.6 | 15.6 | 15.5 | 16.0 | 16.2 | 16.1 | 16.1 |
| <i>glmM</i> | 16.6 | 16.6 | 16.5 | 16.6 | 16.6 | 16.6 | 16.6 | 16.6 |
| <i>glmS</i> | 17.3 | 17.3 | 17.4 | 17.4 | 17.3 | 17.3 | 17.5 | 17.5 |
| <i>glmU</i> | 17.1 | 17.1 | 16.9 | 17.1 | 17.3 | 17.2 | 17.1 | 17.3 |
| <i>glmY</i> | 18.1 | 18.4 | 18.4 | 17.6 | 18.9 | 18.6 | 17.6 | 18.3 |
| <i>glmZ</i> | 18.3 | 18.0 | 18.5 | 17.9 | 18.8 | 18.3 | 18.0 | 18.6 |
| <i>glnA</i> | 18.8 | 18.5 | 18.7 | 18.7 | 17.4 | 18.1 | 18.1 | 17.8 |
| <i>glnB</i> | 16.9 | 16.9 | 16.3 | 16.6 | 16.5 | 16.6 | 16.0 | 16.5 |
| <i>glnD</i> | 15.5 | 15.7 | 15.5 | 15.2 | 15.1 | 15.8 | 15.5 | 15.2 |
| <i>glnE</i> | 15.3 | 15.3 | 15.0 | 15.2 | 15.4 | 15.3 | 15.2 | 15.3 |
| <i>glnG</i> | 14.8 | 14.6 | 14.6 | 14.7 | 14.0 | 14.3 | 14.4 | 14.2 |
| <i>glnH</i> | 18.7 | 18.4 | 18.4 | 18.7 | 17.8 | 18.4 | 18.2 | 17.6 |
| <i>glnK</i> | 14.3 | 13.8 | 13.7 | 13.7 | 12.9 | 13.5 | 13.1 | 13.0 |
| <i>glnL</i> | 15.6 | 15.4 | 15.3 | 15.5 | 14.3 | 14.9 | 14.7 | 14.5 |
| <i>glnP</i> | 17.0 | 16.9 | 17.2 | 17.0 | 16.2 | 16.9 | 17.1 | 16.4 |
| <i>glnQ</i> | 16.9 | 16.7 | 16.7 | 16.8 | 15.9 | 16.5 | 16.6 | 16.2 |
| <i>glnS</i> | 17.2 | 17.2 | 17.1 | 17.2 | 17.1 | 17.3 | 17.3 | 17.4 |
| <i>glnU</i> | 19.3 | 19.1 | 19.1 | 19.1 | 18.8 | 19.1 | 19.0 | 19.6 |
| <i>glnV</i> | 18.9 | 18.9 | 18.9 | 18.4 | 18.4 | 19.3 | 18.2 | 18.8 |
| <i>glnW</i> | 19.6 | 19.7 | 19.4 | 19.5 | 19.2 | 19.5 | 19.1 | 19.5 |
| <i>glnX</i> | 18.4 | 18.6 | 18.6 | 18.6 | 18.5 | 18.8 | 18.1 | 18.7 |
| <i>gloA</i> | 17.0 | 17.0 | 16.8 | 16.7 | 16.9 | 16.9 | 16.7 | 16.9 |
| <i>gloB</i> | 15.3 | 15.1 | 14.8 | 14.8 | 15.0 | 15.2 | 14.7 | 14.9 |
| <i>glpA</i> | 12.7 | 12.7 | 12.7 | 13.0 | 13.0 | 12.7 | 13.0 | 12.6 |
| <i>glpB</i> | 12.9 | 13.0 | 12.8 | 13.3 | 13.3 | 12.9 | 13.0 | 12.7 |
| <i>glpC</i> | 12.9 | 12.9 | 12.7 | 13.2 | 13.0 | 12.9 | 12.9 | 12.7 |
| <i>glpD</i> | 13.4 | 13.4 | 13.3 | 13.2 | 13.1 | 12.9 | 13.0 | 12.7 |
| <i>glpE</i> | 15.6 | 15.6 | 15.2 | 14.9 | 14.3 | 14.7 | 14.0 | 14.2 |
| <i>glpF</i> | 13.5 | 13.3 | 13.2 | 13.2 | 13.1 | 13.2 | 13.0 | 13.3 |
| <i>glpG</i> | 15.9 | 15.9 | 15.5 | 15.8 | 15.7 | 15.9 | 15.3 | 15.5 |
| <i>glpK</i> | 14.0 | 13.9 | 13.7 | 13.8 | 13.5 | 13.7 | 13.6 | 13.6 |
| <i>glpQ</i> | 14.0 | 14.1 | 13.6 | 13.7 | 14.0 | 14.3 | 13.7 | 13.9 |
| <i>glpR</i> | 15.3 | 15.3 | 15.2 | 14.9 | 15.0 | 15.3 | 15.1 | 15.1 |
| <i>glpT</i> | 13.1 | 13.1 | 13.0 | 13.0 | 13.2 | 13.1 | 13.0 | 12.9 |
| <i>glpX</i> | 14.5 | 14.4 | 14.4 | 14.1 | 15.1 | 14.9 | 15.0 | 15.2 |

|             |      |      |      |      |      |      |      |      |
|-------------|------|------|------|------|------|------|------|------|
| <i>glrK</i> | 14.1 | 14.1 | 14.0 | 13.8 | 14.3 | 14.4 | 14.1 | 14.2 |
| <i>glrR</i> | 14.9 | 14.9 | 14.5 | 14.5 | 14.6 | 14.9 | 14.5 | 14.6 |
| <i>gliA</i> | 19.0 | 18.9 | 19.4 | 19.0 | 16.7 | 17.7 | 17.3 | 17.1 |
| <i>gliB</i> | 18.7 | 17.9 | 18.9 | 18.8 | 18.6 | 17.7 | 18.8 | 18.6 |
| <i>gliD</i> | 18.5 | 17.7 | 18.6 | 18.6 | 18.5 | 17.4 | 18.5 | 18.3 |
| <i>gliF</i> | 15.5 | 14.9 | 15.0 | 15.4 | 14.9 | 14.6 | 14.6 | 14.6 |
| <i>gliI</i> | 17.6 | 17.7 | 17.3 | 17.7 | 15.5 | 16.6 | 15.9 | 16.0 |
| <i>gliJ</i> | 14.7 | 14.6 | 14.7 | 14.7 | 13.6 | 13.9 | 13.9 | 13.7 |
| <i>gliK</i> | 15.3 | 15.1 | 14.9 | 15.3 | 13.8 | 14.3 | 13.9 | 14.0 |
| <i>gliL</i> | 15.2 | 15.0 | 14.9 | 14.9 | 13.9 | 14.3 | 14.1 | 14.1 |
| <i>gliP</i> | 14.8 | 14.3 | 15.0 | 14.9 | 15.3 | 15.3 | 15.4 | 15.4 |
| <i>gliS</i> | 14.5 | 14.4 | 14.3 | 14.4 | 14.6 | 14.4 | 14.4 | 14.8 |
| <i>gliT</i> | 17.2 | 17.1 | 18.1 | 17.0 | 18.8 | 17.7 | 18.0 | 17.8 |
| <i>gliU</i> | 18.4 | 18.5 | 18.4 | 17.6 | 18.9 | 18.5 | 18.1 | 18.0 |
| <i>gliV</i> | 18.5 | 18.4 | 18.7 | 17.5 | 19.1 | 18.4 | 18.2 | 18.1 |
| <i>gliW</i> | 18.6 | 18.3 | 18.7 | 17.9 | 19.3 | 18.7 | 18.8 | 18.6 |
| <i>gliX</i> | 17.3 | 17.2 | 17.2 | 17.3 | 17.4 | 17.3 | 17.5 | 17.4 |
| <i>glvB</i> | 12.8 | 12.9 | 12.7 | 12.9 | 12.8 | 12.8 | 12.7 | 12.8 |
| <i>glvC</i> | 12.6 | 12.7 | 12.6 | 12.8 | 12.8 | 12.6 | 12.7 | 12.5 |
| <i>glvG</i> | 13.2 | 13.0 | 13.0 | 13.1 | 13.1 | 13.3 | 13.1 | 13.1 |
| <i>glxK</i> | 13.5 | 13.4 | 13.4 | 13.6 | 13.8 | 13.4 | 13.5 | 13.2 |
| <i>glxR</i> | 12.9 | 12.9 | 12.7 | 13.0 | 13.2 | 12.9 | 13.7 | 12.7 |
| <i>glyA</i> | 19.1 | 19.1 | 19.0 | 19.1 | 19.4 | 19.1 | 19.3 | 19.4 |
| <i>glyQ</i> | 16.9 | 16.9 | 17.3 | 17.0 | 17.1 | 16.7 | 17.3 | 16.9 |
| <i>glyS</i> | 17.0 | 17.0 | 17.0 | 17.1 | 16.9 | 17.0 | 17.2 | 17.1 |
| <i>glyT</i> | 19.8 | 19.7 | 19.8 | 19.3 | 19.8 | 19.9 | 19.6 | 19.6 |
| <i>glyU</i> | 15.8 | 15.6 | 15.8 | 14.7 | 16.4 | 15.8 | 15.0 | 15.2 |
| <i>glyV</i> | 20.0 | 19.9 | 19.6 | 19.8 | 19.8 | 20.0 | 19.2 | 19.8 |
| <i>glyW</i> | 19.4 | 19.5 | 18.9 | 18.8 | 19.2 | 19.5 | 18.5 | 19.4 |
| <i>glyX</i> | 19.9 | 19.8 | 19.2 | 19.7 | 19.5 | 19.9 | 18.8 | 19.8 |
| <i>glyY</i> | 19.2 | 19.3 | 19.0 | 19.3 | 19.3 | 19.5 | 18.6 | 19.3 |
| <i>gmd</i>  | 13.0 | 13.1 | 12.9 | 13.0 | 13.0 | 12.9 | 12.8 | 12.7 |
| <i>gmhB</i> | 16.7 | 16.8 | 16.1 | 16.4 | 16.8 | 16.9 | 16.6 | 16.7 |
| <i>gmk</i>  | 17.5 | 17.4 | 16.9 | 17.2 | 17.5 | 17.5 | 17.1 | 17.5 |
| <i>gmm</i>  | 12.8 | 12.9 | 12.8 | 13.5 | 13.2 | 12.7 | 12.9 | 12.7 |
| <i>gmr</i>  | 14.5 | 14.3 | 13.9 | 14.2 | 14.1 | 14.2 | 13.9 | 14.1 |
| <i>gnd</i>  | 18.9 | 18.8 | 18.7 | 18.9 | 18.7 | 18.6 | 18.7 | 18.8 |
| <i>gnsA</i> | 16.6 | 16.5 | 16.1 | 16.2 | 15.7 | 16.6 | 15.6 | 16.2 |
| <i>gnsB</i> | 17.3 | 17.1 | 17.0 | 16.3 | 17.3 | 17.2 | 15.5 | 16.0 |
| <i>gntK</i> | 14.1 | 13.9 | 13.6 | 13.7 | 13.3 | 13.4 | 13.2 | 13.4 |
| <i>gntP</i> | 13.1 | 12.9 | 13.1 | 13.2 | 12.9 | 12.8 | 12.9 | 12.8 |
| <i>gntR</i> | 15.1 | 15.0 | 15.1 | 14.7 | 15.1 | 15.2 | 15.2 | 15.2 |
| <i>gntT</i> | 14.6 | 14.9 | 14.6 | 15.0 | 13.3 | 13.2 | 13.2 | 13.2 |
| <i>gntU</i> | 13.1 | 13.1 | 13.0 | 15.5 | 12.9 | 12.9 | 12.9 | 12.8 |
| <i>gntX</i> | 15.3 | 15.1 | 15.4 | 15.0 | 15.4 | 15.1 | 15.3 | 15.4 |
| <i>gor</i>  | 16.0 | 15.9 | 15.8 | 15.9 | 15.9 | 15.8 | 16.0 | 16.0 |
| <i>gph</i>  | 16.9 | 16.8 | 16.6 | 17.0 | 16.8 | 16.8 | 16.7 | 16.6 |
| <i>gpmA</i> | 18.3 | 19.5 | 19.6 | 18.2 | 16.8 | 19.5 | 19.7 | 16.6 |
| <i>gpmM</i> | 17.3 | 17.3 | 17.0 | 17.2 | 18.5 | 18.5 | 18.6 | 18.5 |
| <i>gpp</i>  | 15.7 | 15.7 | 15.3 | 15.6 | 15.5 | 15.8 | 15.4 | 15.7 |
| <i>gpsA</i> | 16.5 | 16.5 | 16.4 | 16.5 | 16.6 | 16.4 | 16.4 | 16.4 |
| <i>gpt</i>  | 17.4 | 17.2 | 17.0 | 16.9 | 17.4 | 17.4 | 17.3 | 17.5 |
| <i>greA</i> | 16.3 | 16.2 | 16.1 | 16.1 | 15.6 | 16.2 | 15.9 | 16.2 |
| <i>greB</i> | 14.9 | 14.7 | 14.7 | 14.3 | 14.7 | 15.0 | 14.6 | 14.8 |
| <i>groL</i> | 18.9 | 18.8 | 19.0 | 19.0 | 18.8 | 18.6 | 18.6 | 18.7 |
| <i>groS</i> | 19.9 | 19.7 | 19.7 | 19.8 | 19.6 | 19.6 | 19.2 | 19.5 |
| <i>grpE</i> | 17.8 | 17.8 | 17.6 | 17.5 | 17.6 | 17.9 | 17.1 | 17.7 |
| <i>grxA</i> | 15.5 | 15.9 | 15.0 | 14.7 | 14.3 | 15.2 | 14.1 | 14.7 |
| <i>grxB</i> | 18.2 | 18.2 | 17.6 | 17.9 | 17.6 | 18.3 | 17.6 | 18.0 |
| <i>grxC</i> | 18.4 | 18.4 | 18.4 | 18.3 | 18.6 | 18.6 | 18.3 | 18.1 |
| <i>grxD</i> | 18.4 | 17.2 | 18.1 | 18.1 | 17.3 | 17.1 | 17.0 | 16.9 |

|             |      |      |      |      |      |      |      |      |
|-------------|------|------|------|------|------|------|------|------|
| <i>gshA</i> | 16.7 | 16.7 | 16.4 | 16.6 | 16.8 | 16.7 | 16.5 | 16.7 |
| <i>gshB</i> | 16.6 | 16.4 | 16.3 | 16.5 | 16.3 | 16.5 | 16.3 | 16.3 |
| <i>gsiA</i> | 16.1 | 16.4 | 15.9 | 15.9 | 16.6 | 17.0 | 16.6 | 16.5 |
| <i>gsiB</i> | 15.8 | 16.1 | 15.7 | 15.7 | 16.2 | 16.6 | 16.4 | 16.1 |
| <i>gsiC</i> | 15.0 | 15.1 | 15.0 | 14.6 | 15.4 | 15.8 | 15.6 | 15.3 |
| <i>gsiD</i> | 15.0 | 15.2 | 14.9 | 14.7 | 15.3 | 15.9 | 15.4 | 15.4 |
| <i>gsk</i>  | 15.3 | 15.3 | 15.1 | 15.2 | 15.0 | 15.2 | 14.9 | 14.9 |
| <i>gspA</i> | 13.0 | 12.9 | 12.8 | 13.3 | 13.1 | 13.0 | 12.9 | 12.8 |
| <i>gspB</i> | 14.1 | 14.0 | 13.8 | 14.0 | 14.1 | 14.3 | 13.9 | 13.7 |
| <i>gspC</i> | 13.1 | 13.0 | 13.0 | 12.8 | 12.9 | 13.0 | 12.8 | 12.7 |
| <i>gspD</i> | 13.1 | 13.2 | 13.1 | 13.1 | 13.0 | 13.1 | 13.0 | 12.9 |
| <i>gspE</i> | 12.9 | 12.9 | 12.9 | 13.0 | 12.8 | 12.8 | 12.8 | 12.7 |
| <i>gspF</i> | 12.8 | 12.8 | 12.7 | 12.9 | 12.8 | 12.8 | 12.7 | 12.7 |
| <i>gspG</i> | 13.1 | 13.1 | 12.9 | 13.0 | 13.2 | 12.9 | 12.8 | 12.8 |
| <i>gspH</i> | 12.8 | 12.8 | 12.7 | 13.2 | 12.7 | 12.8 | 12.9 | 12.6 |
| <i>gspI</i> | 12.8 | 12.8 | 12.6 | 12.8 | 13.0 | 12.8 | 12.6 | 12.6 |
| <i>gspJ</i> | 12.8 | 12.8 | 12.6 | 12.9 | 12.7 | 12.8 | 12.7 | 12.8 |
| <i>gspK</i> | 12.7 | 12.7 | 12.5 | 15.3 | 12.7 | 12.7 | 12.6 | 12.5 |
| <i>gspL</i> | 13.0 | 13.0 | 12.8 | 13.0 | 13.1 | 13.1 | 12.8 | 12.8 |
| <i>gspM</i> | 13.3 | 13.2 | 13.0 | 13.5 | 13.2 | 13.3 | 12.9 | 13.1 |
| <i>gspO</i> | 12.9 | 12.8 | 12.9 | 13.0 | 12.9 | 12.9 | 12.8 | 12.8 |
| <i>gss</i>  | 16.0 | 16.0 | 15.6 | 16.1 | 16.4 | 16.2 | 16.3 | 16.5 |
| <i>gst</i>  | 16.6 | 16.7 | 16.5 | 16.5 | 16.1 | 16.2 | 15.9 | 16.0 |
| <i>gstB</i> | 16.2 | 16.2 | 16.4 | 15.9 | 16.0 | 16.1 | 16.0 | 15.8 |
| <i>guaA</i> | 18.0 | 18.2 | 18.0 | 18.2 | 17.8 | 17.8 | 18.0 | 18.0 |
| <i>guaB</i> | 17.9 | 18.1 | 18.1 | 18.0 | 18.4 | 18.0 | 18.3 | 18.2 |
| <i>guaC</i> | 17.6 | 17.6 | 17.3 | 17.5 | 17.0 | 17.3 | 16.9 | 17.2 |
| <i>guaD</i> | 13.8 | 13.7 | 13.5 | 13.6 | 13.5 | 13.8 | 13.5 | 13.5 |
| <i>gudD</i> | 13.4 | 13.3 | 13.2 | 13.5 | 13.3 | 13.4 | 13.4 | 13.4 |
| <i>gudP</i> | 12.9 | 12.9 | 12.7 | 13.0 | 13.0 | 12.8 | 12.8 | 12.7 |
| <i>gudX</i> | 12.9 | 12.8 | 12.8 | 13.1 | 12.9 | 13.0 | 12.9 | 12.9 |
| <i>gutM</i> | 13.8 | 13.6 | 13.4 | 13.6 | 13.5 | 13.8 | 13.5 | 13.5 |
| <i>gutQ</i> | 14.3 | 14.2 | 14.2 | 14.4 | 14.4 | 14.4 | 14.6 | 14.7 |
| <i>gyrA</i> | 17.2 | 17.2 | 17.2 | 17.3 | 17.2 | 17.1 | 17.3 | 17.2 |
| <i>gyrB</i> | 16.3 | 16.1 | 16.1 | 16.2 | 16.2 | 16.2 | 16.2 | 16.2 |
| <i>hcaB</i> | 13.2 | 13.1 | 13.1 | 13.2 | 13.2 | 13.1 | 13.2 | 13.1 |
| <i>hcaC</i> | 13.5 | 13.5 | 13.4 | 13.2 | 13.4 | 13.5 | 13.5 | 13.9 |
| <i>hcaD</i> | 13.4 | 13.4 | 13.2 | 13.3 | 13.3 | 13.4 | 13.3 | 13.1 |
| <i>hcaE</i> | 13.9 | 13.9 | 13.8 | 13.6 | 14.1 | 14.2 | 14.1 | 14.1 |
| <i>hcaF</i> | 13.5 | 13.4 | 13.2 | 13.3 | 13.2 | 13.6 | 13.3 | 13.3 |
| <i>hcaR</i> | 14.6 | 14.5 | 14.4 | 14.2 | 13.1 | 13.2 | 13.0 | 13.0 |
| <i>hcaT</i> | 13.4 | 13.4 | 13.4 | 13.0 | 13.3 | 13.3 | 13.2 | 13.2 |
| <i>hchA</i> | 16.5 | 16.5 | 16.4 | 16.3 | 15.3 | 16.0 | 15.5 | 15.6 |
| <i>hcp</i>  | 12.8 | 12.8 | 12.8 | 12.9 | 13.6 | 13.3 | 13.7 | 13.7 |
| <i>hcr</i>  | 12.9 | 12.9 | 12.9 | 13.1 | 13.9 | 13.8 | 14.1 | 14.1 |
| <i>hda</i>  | 15.6 | 15.5 | 15.4 | 15.6 | 15.6 | 15.5 | 15.4 | 15.6 |
| <i>hdeA</i> | 19.3 | 19.3 | 18.8 | 19.1 | 20.4 | 20.1 | 20.3 | 20.3 |
| <i>hdeB</i> | 18.9 | 18.9 | 18.0 | 18.6 | 20.0 | 19.9 | 19.9 | 20.1 |
| <i>hdeD</i> | 17.5 | 17.8 | 17.0 | 17.4 | 19.5 | 19.5 | 19.6 | 19.9 |
| <i>hdfR</i> | 14.9 | 14.8 | 14.5 | 14.5 | 14.4 | 14.9 | 14.5 | 14.7 |
| <i>hdhA</i> | 16.7 | 16.5 | 16.0 | 16.6 | 16.9 | 16.8 | 16.5 | 16.6 |
| <i>helD</i> | 15.1 | 15.1 | 14.8 | 14.7 | 15.0 | 15.1 | 14.8 | 14.9 |
| <i>hemA</i> | 15.2 | 15.1 | 15.0 | 14.9 | 15.5 | 15.9 | 15.6 | 15.8 |
| <i>hemB</i> | 16.0 | 16.2 | 16.0 | 15.8 | 15.5 | 16.0 | 15.6 | 15.9 |
| <i>hemC</i> | 15.6 | 15.5 | 15.5 | 15.3 | 15.7 | 15.8 | 15.8 | 15.8 |
| <i>hemD</i> | 15.8 | 15.8 | 15.6 | 15.7 | 15.7 | 15.9 | 15.6 | 15.6 |
| <i>hemE</i> | 15.6 | 15.6 | 15.5 | 15.5 | 15.5 | 15.5 | 15.5 | 15.5 |
| <i>hemF</i> | 14.7 | 14.6 | 14.5 | 14.5 | 14.2 | 14.7 | 14.6 | 14.4 |
| <i>hemG</i> | 15.7 | 15.5 | 15.4 | 15.3 | 15.6 | 15.8 | 15.5 | 15.6 |
| <i>hemH</i> | 14.2 | 14.0 | 14.0 | 13.9 | 13.9 | 13.9 | 13.8 | 13.9 |
| <i>hemL</i> | 16.2 | 16.2 | 16.1 | 16.2 | 15.9 | 16.0 | 16.0 | 16.0 |

|             |      |      |      |      |      |      |      |      |
|-------------|------|------|------|------|------|------|------|------|
| <i>hemN</i> | 15.6 | 14.9 | 15.4 | 15.5 | 15.5 | 15.2 | 15.7 | 15.9 |
| <i>hemX</i> | 16.2 | 16.1 | 15.8 | 16.1 | 15.8 | 16.1 | 15.8 | 15.9 |
| <i>hemY</i> | 15.9 | 15.7 | 15.6 | 15.8 | 15.5 | 15.7 | 15.6 | 15.7 |
| <i>hepA</i> | 14.6 | 14.5 | 14.4 | 14.4 | 14.1 | 14.2 | 14.1 | 14.2 |
| <i>hflC</i> | 17.0 | 16.9 | 16.6 | 17.0 | 16.6 | 16.6 | 16.6 | 16.8 |
| <i>hflD</i> | 16.9 | 16.7 | 16.7 | 16.6 | 16.5 | 16.5 | 16.4 | 16.5 |
| <i>hflK</i> | 16.9 | 16.8 | 17.0 | 17.1 | 17.1 | 16.6 | 16.9 | 16.7 |
| <i>hflX</i> | 17.0 | 17.0 | 16.7 | 16.9 | 17.2 | 17.1 | 16.9 | 17.0 |
| <i>hfq</i>  | 19.0 | 18.9 | 18.6 | 18.8 | 19.0 | 19.0 | 18.9 | 18.9 |
| <i>hha</i>  | 17.7 | 17.4 | 17.2 | 17.3 | 16.8 | 17.1 | 16.5 | 16.4 |
| <i>hicA</i> | 15.8 | 15.8 | 15.2 | 15.2 | 15.7 | 16.2 | 15.1 | 15.5 |
| <i>hicB</i> | 15.4 | 15.3 | 14.9 | 14.8 | 15.0 | 15.6 | 14.9 | 15.2 |
| <i>higA</i> | 14.2 | 14.2 | 13.9 | 13.4 | 13.8 | 14.2 | 13.8 | 14.0 |
| <i>higB</i> | 14.2 | 14.1 | 13.8 | 13.6 | 13.8 | 14.4 | 13.7 | 13.9 |
| <i>hinT</i> | 17.5 | 17.2 | 17.2 | 17.1 | 17.5 | 17.3 | 17.3 | 17.6 |
| <i>hipA</i> | 14.5 | 14.5 | 14.1 | 14.1 | 14.5 | 14.5 | 14.3 | 14.5 |
| <i>hipB</i> | 15.4 | 15.4 | 14.8 | 15.2 | 15.2 | 15.4 | 14.9 | 15.2 |
| <i>hisA</i> | 16.5 | 16.3 | 16.8 | 16.6 | 16.6 | 16.2 | 16.4 | 15.9 |
| <i>hisB</i> | 17.2 | 17.1 | 17.2 | 17.2 | 16.8 | 17.2 | 16.9 | 16.8 |
| <i>hisC</i> | 16.9 | 16.7 | 17.0 | 16.9 | 16.4 | 16.9 | 16.6 | 16.2 |
| <i>hisD</i> | 16.5 | 16.5 | 16.8 | 16.6 | 16.1 | 16.6 | 16.4 | 15.9 |
| <i>hisF</i> | 16.9 | 16.7 | 17.0 | 17.1 | 16.7 | 16.8 | 16.6 | 16.4 |
| <i>hisG</i> | 17.5 | 17.5 | 17.5 | 17.5 | 16.9 | 17.7 | 17.1 | 16.8 |
| <i>hisH</i> | 16.6 | 16.5 | 16.8 | 16.6 | 16.4 | 16.6 | 16.5 | 16.1 |
| <i>hisI</i> | 16.6 | 16.5 | 16.6 | 16.6 | 16.2 | 16.5 | 16.2 | 15.9 |
| <i>hisJ</i> | 18.5 | 18.4 | 18.2 | 18.5 | 16.8 | 18.0 | 17.0 | 16.6 |
| <i>hisL</i> | 19.2 | 19.4 | 18.8 | 18.2 | 19.7 | 20.1 | 18.8 | 19.1 |
| <i>hisM</i> | 16.1 | 16.0 | 15.9 | 16.3 | 14.8 | 15.8 | 15.2 | 15.0 |
| <i>hisP</i> | 15.3 | 15.2 | 15.2 | 15.2 | 14.4 | 15.1 | 14.5 | 14.3 |
| <i>hisQ</i> | 16.5 | 16.4 | 16.4 | 16.6 | 15.5 | 16.1 | 15.7 | 15.4 |
| <i>hisR</i> | 19.7 | 19.7 | 19.1 | 19.0 | 19.7 | 19.5 | 18.8 | 19.7 |
| <i>hisS</i> | 17.1 | 17.1 | 17.1 | 17.1 | 17.4 | 17.2 | 17.2 | 17.2 |
| <i>hlpA</i> | 19.0 | 19.1 | 18.5 | 18.8 | 19.1 | 19.2 | 19.0 | 19.2 |
| <i>hlyE</i> | 13.2 | 13.1 | 12.9 | 13.2 | 14.0 | 14.3 | 13.7 | 13.8 |
| <i>hmp</i>  | 14.5 | 14.4 | 14.4 | 14.1 | 13.5 | 13.8 | 13.6 | 13.5 |
| <i>hns</i>  | 19.4 | 19.3 | 19.2 | 19.2 | 19.4 | 19.4 | 19.3 | 19.5 |
| <i>hofB</i> | 13.1 | 13.1 | 12.9 | 12.9 | 13.0 | 13.1 | 13.0 | 13.0 |
| <i>hofC</i> | 13.1 | 13.0 | 12.9 | 13.0 | 13.2 | 13.1 | 13.0 | 12.9 |
| <i>hofM</i> | 13.6 | 13.8 | 13.3 | 13.5 | 14.0 | 13.8 | 13.7 | 13.4 |
| <i>hofN</i> | 13.0 | 13.0 | 13.0 | 13.1 | 13.0 | 13.1 | 13.2 | 13.0 |
| <i>hofO</i> | 13.0 | 12.9 | 12.8 | 13.3 | 12.9 | 13.0 | 13.0 | 12.9 |
| <i>hofP</i> | 13.1 | 13.1 | 12.9 | 13.7 | 13.5 | 13.0 | 13.2 | 12.9 |
| <i>hofQ</i> | 13.1 | 13.1 | 13.0 | 14.9 | 13.3 | 13.1 | 13.2 | 12.9 |
| <i>hokA</i> | 13.3 | 13.1 | 13.0 | 13.7 | 13.5 | 13.3 | 13.2 | 13.1 |
| <i>hokB</i> | 14.6 | 14.5 | 14.6 | 14.7 | 15.0 | 15.1 | 14.9 | 15.1 |
| <i>hokC</i> | 13.7 | 13.5 | 13.5 | 13.0 | 13.9 | 13.7 | 13.7 | 13.7 |
| <i>hokD</i> | 14.8 | 14.8 | 14.7 | 14.4 | 14.9 | 15.1 | 14.7 | 14.8 |
| <i>hokE</i> | 13.8 | 13.6 | 13.5 | 13.4 | 13.6 | 13.7 | 13.4 | 13.3 |
| <i>holA</i> | 15.7 | 15.8 | 15.4 | 15.4 | 15.6 | 15.9 | 15.4 | 15.5 |
| <i>holB</i> | 14.7 | 14.7 | 14.6 | 14.4 | 14.5 | 14.8 | 14.7 | 14.7 |
| <i>holC</i> | 17.4 | 17.3 | 16.9 | 17.1 | 16.8 | 17.4 | 16.7 | 16.8 |
| <i>holD</i> | 15.7 | 15.5 | 15.7 | 15.5 | 15.6 | 15.4 | 15.5 | 15.6 |
| <i>holE</i> | 16.6 | 16.5 | 16.1 | 16.0 | 16.4 | 16.3 | 15.6 | 15.9 |
| <i>hpf</i>  | 18.7 | 18.7 | 17.9 | 18.5 | 18.6 | 19.0 | 18.3 | 18.6 |
| <i>hpt</i>  | 16.9 | 16.4 | 16.3 | 16.5 | 16.8 | 16.7 | 16.5 | 16.9 |
| <i>hrpA</i> | 15.0 | 14.8 | 14.7 | 14.9 | 14.7 | 14.9 | 14.7 | 14.9 |
| <i>hrpB</i> | 14.0 | 13.8 | 13.7 | 13.7 | 13.9 | 13.9 | 13.8 | 13.9 |
| <i>hscA</i> | 16.1 | 15.2 | 16.1 | 16.2 | 15.4 | 14.7 | 15.5 | 15.5 |
| <i>hscB</i> | 16.8 | 15.9 | 16.4 | 16.7 | 15.3 | 15.5 | 15.6 | 15.8 |
| <i>hscC</i> | 13.0 | 12.9 | 12.8 | 13.0 | 13.3 | 13.1 | 13.0 | 12.9 |
| <i>hsdM</i> | 15.6 | 15.4 | 15.4 | 15.6 | 15.4 | 15.4 | 15.4 | 15.3 |

|             |      |      |      |      |      |      |      |      |
|-------------|------|------|------|------|------|------|------|------|
| <i>hsdR</i> | 15.3 | 14.9 | 15.0 | 15.0 | 14.8 | 15.0 | 15.0 | 15.0 |
| <i>hsdS</i> | 15.4 | 15.1 | 15.0 | 15.4 | 15.0 | 14.9 | 14.6 | 14.7 |
| <i>hslJ</i> | 14.9 | 14.7 | 14.3 | 14.5 | 14.2 | 14.5 | 14.3 | 14.8 |
| <i>hslO</i> | 16.0 | 16.0 | 15.7 | 16.2 | 15.2 | 15.5 | 15.1 | 15.4 |
| <i>hslR</i> | 16.3 | 16.2 | 16.2 | 16.3 | 15.7 | 16.1 | 15.6 | 15.5 |
| <i>hslU</i> | 17.0 | 16.8 | 17.0 | 16.8 | 16.6 | 16.8 | 16.8 | 17.0 |
| <i>hslV</i> | 17.5 | 17.4 | 17.4 | 17.5 | 17.4 | 17.4 | 17.2 | 17.4 |
| <i>hspQ</i> | 15.9 | 15.8 | 16.2 | 15.2 | 16.1 | 16.2 | 16.2 | 16.3 |
| <i>hsrA</i> | 13.8 | 13.5 | 13.4 | 13.3 | 13.6 | 13.7 | 13.6 | 13.9 |
| <i>htgA</i> | 12.6 | 12.7 | 12.6 | 13.2 | 12.7 | 12.7 | 12.5 | 12.7 |
| <i>htpG</i> | 16.9 | 16.7 | 16.9 | 16.8 | 16.4 | 16.4 | 16.4 | 16.6 |
| <i>htpX</i> | 16.9 | 16.7 | 16.8 | 16.8 | 16.5 | 16.3 | 16.1 | 16.6 |
| <i>htrE</i> | 12.7 | 12.7 | 12.5 | 12.9 | 12.9 | 12.8 | 12.6 | 12.7 |
| <i>htrL</i> | 15.0 | 14.7 | 14.3 | 14.5 | 14.5 | 14.6 | 14.0 | 14.3 |
| <i>hupA</i> | 19.8 | 19.7 | 19.5 | 19.4 | 19.7 | 19.6 | 19.3 | 19.6 |
| <i>hupB</i> | 19.1 | 18.9 | 19.1 | 18.6 | 19.2 | 19.1 | 19.0 | 19.3 |
| <i>hyaA</i> | 13.0 | 13.0 | 13.0 | 13.1 | 18.6 | 16.2 | 18.4 | 18.7 |
| <i>hyaB</i> | 12.8 | 12.9 | 12.8 | 13.0 | 18.0 | 15.8 | 17.9 | 18.5 |
| <i>hyaC</i> | 13.1 | 13.2 | 13.0 | 13.7 | 18.2 | 15.8 | 17.8 | 18.5 |
| <i>hyaD</i> | 13.1 | 13.0 | 13.0 | 13.6 | 17.9 | 15.3 | 17.5 | 17.9 |
| <i>hyaE</i> | 13.0 | 12.9 | 12.9 | 13.3 | 17.6 | 15.0 | 17.2 | 17.5 |
| <i>hyaF</i> | 12.9 | 12.9 | 12.8 | 12.9 | 17.2 | 14.7 | 16.7 | 17.4 |
| <i>hybA</i> | 13.3 | 12.9 | 13.2 | 13.4 | 16.5 | 14.6 | 16.2 | 16.3 |
| <i>hybB</i> | 13.3 | 12.9 | 13.1 | 13.0 | 15.3 | 14.1 | 15.1 | 15.2 |
| <i>hybC</i> | 14.3 | 14.0 | 13.9 | 13.9 | 16.1 | 15.2 | 15.8 | 16.1 |
| <i>hybD</i> | 14.3 | 14.1 | 14.0 | 14.6 | 15.4 | 15.1 | 15.2 | 15.6 |
| <i>hybE</i> | 13.8 | 13.7 | 13.6 | 14.4 | 14.6 | 14.3 | 14.7 | 14.9 |
| <i>hybF</i> | 13.7 | 13.6 | 13.4 | 13.7 | 14.4 | 14.1 | 14.3 | 14.6 |
| <i>hybG</i> | 14.2 | 14.1 | 13.7 | 13.9 | 14.6 | 14.6 | 14.5 | 14.9 |
| <i>hybO</i> | 13.4 | 12.9 | 13.2 | 13.4 | 16.5 | 15.2 | 16.2 | 16.3 |
| <i>hycA</i> | 12.7 | 12.7 | 12.6 | 12.6 | 16.2 | 13.8 | 16.3 | 16.8 |
| <i>hycB</i> | 12.8 | 12.8 | 12.7 | 13.1 | 15.9 | 13.7 | 16.3 | 16.6 |
| <i>hycC</i> | 12.7 | 12.7 | 12.7 | 13.0 | 15.2 | 13.2 | 15.5 | 15.8 |
| <i>hycD</i> | 12.9 | 12.9 | 12.8 | 13.1 | 15.7 | 13.4 | 15.9 | 16.2 |
| <i>hycE</i> | 13.0 | 12.9 | 12.9 | 13.3 | 15.9 | 13.5 | 16.2 | 16.4 |
| <i>hycF</i> | 13.1 | 13.0 | 13.0 | 12.9 | 16.2 | 13.9 | 16.6 | 16.8 |
| <i>hycG</i> | 13.2 | 13.3 | 13.1 | 13.3 | 16.0 | 13.9 | 16.1 | 16.4 |
| <i>hycH</i> | 14.0 | 14.0 | 13.6 | 14.1 | 16.3 | 14.4 | 16.1 | 16.6 |
| <i>hycI</i> | 14.3 | 14.3 | 14.0 | 14.0 | 15.8 | 14.6 | 15.7 | 16.4 |
| <i>hydN</i> | 13.1 | 13.1 | 12.9 | 13.2 | 16.4 | 14.2 | 16.4 | 17.1 |
| <i>hyfA</i> | 12.9 | 13.0 | 12.8 | 13.2 | 13.2 | 13.0 | 13.1 | 12.9 |
| <i>hyfB</i> | 12.6 | 12.7 | 12.6 | 12.8 | 12.8 | 12.7 | 12.7 | 12.6 |
| <i>hyfC</i> | 12.6 | 12.6 | 12.5 | 12.8 | 12.7 | 12.6 | 12.6 | 12.5 |
| <i>hyfD</i> | 12.6 | 12.7 | 12.6 | 12.6 | 12.7 | 12.6 | 12.7 | 12.6 |
| <i>hyfE</i> | 12.7 | 13.0 | 12.6 | 12.8 | 13.2 | 12.7 | 12.7 | 12.7 |
| <i>hyfF</i> | 12.7 | 12.7 | 12.7 | 12.7 | 12.7 | 12.8 | 12.8 | 12.6 |
| <i>hyfG</i> | 12.9 | 13.0 | 12.8 | 13.5 | 13.0 | 13.0 | 13.0 | 12.8 |
| <i>hyfH</i> | 13.2 | 13.2 | 13.1 | 12.9 | 13.1 | 13.2 | 13.3 | 13.0 |
| <i>hyfI</i> | 12.9 | 12.9 | 12.9 | 13.1 | 13.0 | 13.0 | 13.0 | 12.8 |
| <i>hyfJ</i> | 13.2 | 13.0 | 13.0 | 13.4 | 13.2 | 13.2 | 13.2 | 13.0 |
| <i>hyfR</i> | 12.8 | 12.8 | 12.7 | 12.9 | 12.9 | 12.8 | 12.7 | 12.7 |
| <i>hyi</i>  | 12.9 | 12.9 | 12.8 | 13.0 | 13.1 | 13.0 | 13.7 | 12.7 |
| <i>hypA</i> | 13.7 | 13.3 | 13.5 | 13.8 | 16.5 | 14.5 | 16.1 | 16.3 |
| <i>hypB</i> | 13.9 | 13.2 | 13.7 | 13.8 | 16.5 | 14.9 | 16.7 | 16.7 |
| <i>hypC</i> | 13.8 | 13.2 | 13.6 | 13.5 | 16.0 | 14.7 | 16.4 | 16.5 |
| <i>hypD</i> | 13.8 | 13.5 | 13.6 | 13.3 | 15.8 | 14.5 | 16.1 | 16.3 |
| <i>hypE</i> | 13.5 | 13.4 | 13.5 | 13.0 | 15.3 | 14.1 | 15.4 | 15.5 |
| <i>hypF</i> | 13.3 | 13.3 | 13.2 | 13.2 | 14.6 | 14.1 | 14.8 | 15.0 |
| <i>hyuA</i> | 12.8 | 12.9 | 12.7 | 13.2 | 13.0 | 12.8 | 12.8 | 12.7 |
| <i>iaaA</i> | 16.5 | 16.9 | 16.7 | 16.2 | 17.5 | 17.3 | 17.4 | 17.0 |
| <i>iadA</i> | 14.7 | 14.5 | 14.7 | 14.3 | 15.3 | 15.1 | 15.8 | 15.7 |

|                |      |      |      |      |      |      |      |      |
|----------------|------|------|------|------|------|------|------|------|
| <i>iap</i>     | 14.5 | 14.4 | 14.1 | 14.5 | 14.2 | 14.4 | 14.1 | 14.2 |
| <i>ibpA</i>    | 16.7 | 16.6 | 16.5 | 16.0 | 16.1 | 16.5 | 15.9 | 16.3 |
| <i>ibpB</i>    | 14.6 | 14.4 | 14.4 | 13.8 | 13.7 | 14.3 | 13.6 | 13.7 |
| <i>ibsA</i>    | 13.2 | 13.5 | 13.1 | 14.1 | 13.4 | 13.3 | 13.0 | 13.2 |
| <i>ibsB</i>    | 13.4 | 13.4 | 13.3 | 13.4 | 13.5 | 13.4 | 13.3 | 13.2 |
| <i>ibsC</i>    | 14.0 | 13.7 | 13.7 | 13.6 | 14.0 | 13.6 | 13.7 | 13.8 |
| <i>ibsD</i>    | 13.6 | 13.5 | 13.3 | 14.5 | 13.4 | 13.4 | 13.3 | 13.3 |
| <i>ibsE</i>    | 13.1 | 13.3 | 13.2 | 13.8 | 13.5 | 13.2 | 13.1 | 13.1 |
| <i>icd</i>     | 19.9 | 19.8 | 20.1 | 19.9 | 18.0 | 18.1 | 17.9 | 18.0 |
| <i>icdC</i>    | 17.9 | 17.9 | 18.1 | 18.0 | 15.5 | 15.6 | 15.0 | 15.1 |
| <i>iclR</i>    | 15.3 | 15.3 | 15.1 | 14.9 | 15.6 | 15.6 | 15.3 | 15.5 |
| <i>idi</i>     | 14.1 | 14.3 | 14.0 | 13.6 | 13.9 | 14.1 | 13.8 | 13.8 |
| <i>idnD</i>    | 13.2 | 13.1 | 13.1 | 13.4 | 13.1 | 13.2 | 13.1 | 12.8 |
| <i>idnK</i>    | 13.2 | 13.1 | 12.9 | 13.1 | 13.0 | 13.0 | 12.9 | 12.8 |
| <i>idnO</i>    | 13.3 | 13.2 | 13.2 | 13.0 | 13.2 | 13.5 | 13.3 | 13.0 |
| <i>idnR</i>    | 14.7 | 14.6 | 14.2 | 14.2 | 14.1 | 14.6 | 14.1 | 14.3 |
| <i>idnT</i>    | 13.4 | 13.4 | 13.2 | 13.2 | 13.4 | 13.4 | 13.3 | 13.3 |
| <i>ihfA</i>    | 18.6 | 18.6 | 18.1 | 18.2 | 18.4 | 18.7 | 18.4 | 18.9 |
| <i>ihfB</i>    | 18.7 | 18.8 | 18.8 | 18.4 | 18.8 | 18.8 | 18.7 | 18.7 |
| <i>ileS</i>    | 17.2 | 17.3 | 17.1 | 17.2 | 17.6 | 17.6 | 17.8 | 17.7 |
| <i>ileT</i>    | 19.2 | 19.0 | 18.9 | 18.5 | 19.5 | 18.9 | 18.4 | 18.7 |
| <i>ileU</i>    | 19.0 | 18.9 | 19.0 | 18.2 | 19.6 | 18.8 | 18.4 | 18.8 |
| <i>ileV</i>    | 19.1 | 19.0 | 19.0 | 18.3 | 19.5 | 18.5 | 18.3 | 18.9 |
| <i>ileX</i>    | 13.7 | 13.5 | 13.3 | 13.7 | 13.3 | 13.5 | 13.3 | 13.3 |
| <i>ileY</i>    | 13.4 | 13.7 | 13.3 | 13.5 | 13.5 | 13.6 | 13.2 | 13.2 |
| <i>ilvA</i>    | 15.7 | 15.3 | 15.6 | 15.6 | 16.0 | 16.1 | 16.4 | 16.5 |
| <i>ilvB</i>    | 17.6 | 16.6 | 17.6 | 17.6 | 15.5 | 15.6 | 15.5 | 15.7 |
| <i>ilvC</i>    | 19.2 | 19.7 | 19.6 | 19.4 | 19.2 | 19.1 | 19.2 | 19.0 |
| <i>ilvD</i>    | 16.2 | 15.9 | 16.3 | 16.3 | 16.8 | 16.7 | 17.1 | 17.0 |
| <i>ilvE</i>    | 17.4 | 17.4 | 17.2 | 17.3 | 17.7 | 17.9 | 17.9 | 17.8 |
| <i>ilvG_1</i>  | 18.2 | 18.6 | 18.4 | 18.2 | 18.9 | 19.1 | 19.0 | 18.9 |
| <i>ilvG_2</i>  | 16.2 | 16.5 | 16.2 | 16.1 | 16.8 | 17.5 | 17.1 | 17.0 |
| <i>ilvH</i>    | 17.6 | 17.6 | 17.2 | 17.7 | 17.5 | 17.6 | 17.4 | 17.6 |
| <i>ilvI</i>    | 17.1 | 17.1 | 17.1 | 17.1 | 17.4 | 17.2 | 17.3 | 17.1 |
| <i>ilvL</i>    | 18.9 | 18.7 | 19.5 | 18.2 | 19.8 | 19.4 | 18.8 | 19.1 |
| <i>ilvM</i>    | 17.4 | 17.6 | 17.0 | 17.0 | 17.6 | 18.5 | 17.6 | 17.7 |
| <i>ilvN</i>    | 17.8 | 16.7 | 17.5 | 17.9 | 15.3 | 15.7 | 15.3 | 16.0 |
| <i>ilvX</i>    | 19.4 | 19.8 | 19.9 | 19.4 | 20.6 | 20.0 | 20.0 | 19.7 |
| <i>ilvY</i>    | 13.9 | 13.9 | 13.9 | 13.9 | 13.9 | 13.9 | 13.9 | 13.9 |
| <i>inaA</i>    | 15.0 | 15.3 | 14.9 | 15.0 | 14.7 | 14.9 | 14.4 | 14.8 |
| <i>infA</i>    | 18.7 | 18.6 | 18.6 | 18.3 | 18.7 | 18.5 | 18.1 | 18.8 |
| <i>infB</i>    | 17.7 | 17.5 | 17.5 | 17.9 | 17.6 | 17.7 | 17.6 | 17.6 |
| <i>infC</i>    | 19.4 | 19.4 | 19.7 | 19.2 | 19.8 | 19.6 | 19.6 | 19.4 |
| <i>insA-1</i>  | 15.1 | 15.2 | 15.3 | 14.8 | 15.5 | 15.4 | 15.5 | 15.5 |
| <i>insA-2</i>  | 15.3 | 15.4 | 15.2 | 14.7 | 15.7 | 15.8 | 15.6 | 15.6 |
| <i>insA-3</i>  | 15.3 | 15.4 | 15.2 | 15.0 | 15.7 | 15.8 | 15.6 | 15.8 |
| <i>insA-4</i>  | 15.2 | 15.3 | 15.5 | 14.8 | 15.8 | 15.7 | 15.7 | 15.7 |
| <i>insA-5</i>  | 15.1 | 15.1 | 15.3 | 14.8 | 15.7 | 15.4 | 15.5 | 15.4 |
| <i>insA-6</i>  | 15.2 | 15.4 | 15.3 | 14.7 | 15.8 | 15.5 | 15.6 | 15.7 |
| <i>insA-7</i>  | 14.9 | 15.3 | 15.3 | 14.1 | 15.1 | 15.8 | 15.5 | 15.0 |
| <i>insAB-1</i> | 14.4 | 14.4 | 14.5 | 14.3 | 14.8 | 14.6 | 14.7 | 14.8 |
| <i>insAB-2</i> | 14.5 | 14.6 | 14.5 | 14.3 | 14.9 | 14.9 | 14.8 | 14.9 |
| <i>insAB-3</i> | 14.5 | 14.6 | 14.4 | 14.3 | 14.8 | 14.9 | 14.8 | 15.0 |
| <i>insAB-4</i> | 14.5 | 14.5 | 14.6 | 14.1 | 15.0 | 14.8 | 14.9 | 15.0 |
| <i>insAB-5</i> | 14.4 | 14.4 | 14.5 | 14.2 | 14.9 | 14.5 | 14.7 | 14.7 |
| <i>insAB-6</i> | 14.4 | 14.5 | 14.5 | 14.2 | 14.9 | 14.6 | 14.8 | 14.9 |
| <i>insB-1</i>  | 13.7 | 13.8 | 13.9 | 14.0 | 14.1 | 13.9 | 14.1 | 14.2 |
| <i>insB-2</i>  | 13.9 | 13.9 | 13.7 | 14.1 | 14.1 | 13.9 | 14.1 | 14.2 |
| <i>insB-3</i>  | 13.8 | 13.8 | 13.7 | 13.6 | 14.0 | 13.9 | 14.0 | 14.2 |
| <i>insB-4</i>  | 13.8 | 13.8 | 13.8 | 13.4 | 14.2 | 14.0 | 14.2 | 14.3 |
| <i>insB-5</i>  | 13.8 | 13.8 | 13.8 | 13.9 | 14.1 | 13.7 | 14.1 | 14.1 |

|                 |      |      |      |      |      |      |      |      |
|-----------------|------|------|------|------|------|------|------|------|
| <i>insB-6</i>   | 13.7 | 13.7 | 13.7 | 13.7 | 14.1 | 13.7 | 14.1 | 14.1 |
| <i>insB-7_1</i> | 13.9 | 14.0 | 14.1 | 13.5 | 14.0 | 14.4 | 14.4 | 14.3 |
| <i>insB-7_2</i> | 13.5 | 13.7 | 13.4 | 13.0 | 13.7 | 13.7 | 13.6 | 13.3 |
| <i>insC-1</i>   | 15.9 | 16.1 | 16.0 | 15.5 | 16.2 | 16.4 | 16.2 | 16.0 |
| <i>insC-2</i>   | 16.1 | 16.2 | 16.0 | 15.6 | 16.3 | 16.4 | 16.0 | 16.1 |
| <i>insC-3</i>   | 16.1 | 16.2 | 16.0 | 15.7 | 16.4 | 16.4 | 16.0 | 16.0 |
| <i>insC-4</i>   | 16.1 | 16.2 | 15.9 | 15.6 | 16.3 | 16.5 | 16.1 | 16.1 |
| <i>insC-5</i>   | 16.1 | 16.2 | 16.0 | 15.8 | 16.5 | 16.2 | 16.1 | 16.0 |
| <i>insC-6</i>   | 16.1 | 16.2 | 16.1 | 15.7 | 16.4 | 16.4 | 16.1 | 15.9 |
| <i>insCD-1</i>  | 15.4 | 15.5 | 15.4 | 15.2 | 15.8 | 15.7 | 15.6 | 15.6 |
| <i>insCD-2</i>  | 15.5 | 15.7 | 15.4 | 15.2 | 15.8 | 15.8 | 15.5 | 15.6 |
| <i>insCD-3</i>  | 15.5 | 15.7 | 15.3 | 15.2 | 15.9 | 15.8 | 15.5 | 15.6 |
| <i>insCD-4</i>  | 15.5 | 15.6 | 15.3 | 15.2 | 15.9 | 15.8 | 15.5 | 15.6 |
| <i>insCD-5</i>  | 15.5 | 15.7 | 15.3 | 15.3 | 16.0 | 15.7 | 15.6 | 15.6 |
| <i>insCD-6</i>  | 15.5 | 15.6 | 15.4 | 15.2 | 15.9 | 15.8 | 15.6 | 15.5 |
| <i>insD</i>     | 15.2 | 15.3 | 14.9 | 15.0 | 15.7 | 15.3 | 15.1 | 15.3 |
| <i>insD-1</i>   | 15.2 | 15.3 | 15.0 | 15.0 | 15.7 | 15.1 | 15.3 | 15.3 |
| <i>insD-2</i>   | 15.2 | 15.4 | 15.1 | 15.0 | 15.6 | 15.5 | 15.3 | 15.4 |
| <i>insD-3</i>   | 15.3 | 15.4 | 15.1 | 15.0 | 15.7 | 15.5 | 15.3 | 15.5 |
| <i>insD-4</i>   | 15.3 | 15.3 | 15.0 | 15.1 | 15.7 | 15.5 | 15.3 | 15.5 |
| <i>insD-5</i>   | 15.3 | 15.5 | 15.0 | 15.0 | 15.9 | 15.4 | 15.4 | 15.5 |
| <i>insD-6</i>   | 15.2 | 15.4 | 15.0 | 15.0 | 15.7 | 15.5 | 15.4 | 15.5 |
| <i>insE-1</i>   | 15.8 | 15.9 | 15.5 | 15.4 | 15.7 | 16.2 | 15.8 | 15.9 |
| <i>insE-2</i>   | 15.8 | 15.9 | 15.5 | 15.6 | 15.6 | 16.1 | 15.8 | 15.9 |
| <i>insE-3</i>   | 15.6 | 15.8 | 15.6 | 15.8 | 15.4 | 15.9 | 15.8 | 15.7 |
| <i>insE-4</i>   | 15.8 | 16.0 | 15.4 | 15.7 | 15.7 | 16.1 | 15.7 | 15.7 |
| <i>insE-5</i>   | 15.6 | 15.7 | 15.5 | 15.3 | 15.6 | 15.9 | 15.8 | 15.6 |
| <i>insEF-1</i>  | 15.0 | 15.0 | 14.7 | 14.5 | 14.9 | 15.3 | 14.9 | 15.0 |
| <i>insEF-2</i>  | 14.9 | 15.1 | 14.8 | 14.7 | 14.9 | 15.1 | 14.9 | 15.0 |
| <i>insEF-3</i>  | 14.9 | 15.0 | 14.8 | 14.8 | 14.8 | 15.2 | 14.9 | 14.9 |
| <i>insEF-4</i>  | 14.9 | 15.0 | 14.7 | 14.6 | 14.9 | 15.1 | 14.9 | 14.9 |
| <i>insEF-5</i>  | 14.9 | 14.9 | 14.7 | 14.5 | 14.9 | 15.0 | 14.9 | 14.9 |
| <i>insF-1</i>   | 14.6 | 14.6 | 14.4 | 14.1 | 14.5 | 14.9 | 14.4 | 14.6 |
| <i>insF-2</i>   | 14.6 | 14.8 | 14.5 | 14.5 | 14.6 | 14.8 | 14.6 | 14.6 |
| <i>insF-3</i>   | 14.5 | 14.6 | 14.4 | 14.2 | 14.5 | 14.8 | 14.5 | 14.5 |
| <i>insF-4</i>   | 14.7 | 14.7 | 14.5 | 14.3 | 14.7 | 14.7 | 14.6 | 14.6 |
| <i>insF-5</i>   | 14.5 | 14.5 | 14.3 | 14.1 | 14.6 | 14.6 | 14.4 | 14.5 |
| <i>insG</i>     | 14.0 | 14.1 | 13.8 | 13.8 | 13.8 | 13.9 | 13.7 | 13.8 |
| <i>insH-1</i>   | 18.4 | 18.2 | 18.5 | 18.3 | 18.4 | 18.4 | 18.6 | 18.2 |
| <i>insH-10</i>  | 18.4 | 18.2 | 18.5 | 18.3 | 18.4 | 18.4 | 18.6 | 18.2 |
| <i>insH-11</i>  | 18.5 | 18.3 | 18.6 | 18.5 | 18.5 | 18.5 | 18.7 | 18.3 |
| <i>insH-2</i>   | 18.5 | 18.3 | 18.6 | 18.5 | 18.4 | 18.5 | 18.7 | 18.3 |
| <i>insH-3</i>   | 18.5 | 18.3 | 18.6 | 18.4 | 18.4 | 18.6 | 18.7 | 18.4 |
| <i>insH-4</i>   | 18.7 | 18.4 | 18.7 | 18.6 | 18.5 | 18.6 | 18.8 | 18.4 |
| <i>insH-5</i>   | 16.9 | 16.7 | 17.3 | 16.9 | 17.1 | 16.6 | 17.1 | 16.4 |
| <i>insH-6</i>   | 18.4 | 18.2 | 18.5 | 18.4 | 18.4 | 18.4 | 18.6 | 18.1 |
| <i>insH-7</i>   | 18.5 | 18.3 | 18.6 | 18.5 | 18.5 | 18.6 | 18.7 | 18.4 |
| <i>insH-8</i>   | 18.3 | 18.1 | 18.5 | 18.4 | 18.4 | 18.4 | 18.6 | 18.2 |
| <i>insH-9</i>   | 18.6 | 18.4 | 18.7 | 18.5 | 18.5 | 18.7 | 18.8 | 18.4 |
| <i>insI-1</i>   | 15.2 | 15.2 | 14.8 | 14.9 | 15.3 | 15.4 | 14.8 | 15.0 |
| <i>insI-2</i>   | 15.3 | 15.1 | 14.7 | 14.8 | 15.3 | 15.3 | 14.8 | 14.9 |
| <i>insI-3</i>   | 15.4 | 15.2 | 14.7 | 15.1 | 15.4 | 15.2 | 14.8 | 15.0 |
| <i>insJ</i>     | 13.3 | 13.2 | 13.0 | 13.8 | 13.2 | 13.4 | 13.0 | 13.0 |
| <i>insJK</i>    | 13.2 | 13.1 | 12.8 | 13.4 | 13.1 | 13.3 | 12.8 | 12.9 |
| <i>insK</i>     | 13.2 | 13.1 | 12.7 | 13.2 | 13.0 | 13.3 | 12.8 | 12.8 |
| <i>insL-1</i>   | 16.2 | 16.0 | 15.9 | 15.9 | 15.9 | 16.0 | 15.9 | 16.1 |
| <i>insL-2</i>   | 16.2 | 15.9 | 16.0 | 15.9 | 16.0 | 16.1 | 15.9 | 16.1 |
| <i>insL-3</i>   | 16.2 | 16.0 | 15.9 | 16.0 | 15.9 | 16.1 | 15.8 | 16.0 |
| <i>insM</i>     | 14.8 | 14.6 | 14.0 | 14.5 | 14.4 | 14.6 | 13.9 | 14.3 |
| <i>insN-1</i>   | 14.8 | 14.5 | 14.4 | 14.3 | 14.7 | 15.1 | 14.2 | 14.2 |
| <i>insN-2</i>   | 14.4 | 14.3 | 13.9 | 14.1 | 14.3 | 14.7 | 13.9 | 14.0 |

|               |      |      |      |      |      |      |      |      |
|---------------|------|------|------|------|------|------|------|------|
| <i>insO-1</i> | 14.0 | 14.0 | 13.9 | 14.2 | 14.2 | 14.1 | 14.2 | 14.1 |
| <i>insO-2</i> | 13.1 | 13.1 | 13.0 | 13.3 | 13.4 | 13.0 | 13.2 | 12.9 |
| <i>intA</i>   | 15.6 | 15.5 | 15.1 | 15.2 | 15.1 | 15.7 | 15.1 | 15.3 |
| <i>intB</i>   | 14.4 | 14.4 | 13.9 | 13.9 | 14.2 | 14.5 | 13.8 | 14.2 |
| <i>intD</i>   | 14.9 | 14.9 | 14.4 | 14.6 | 14.9 | 15.4 | 14.5 | 14.7 |
| <i>intE</i>   | 13.3 | 13.6 | 13.2 | 13.1 | 13.2 | 13.6 | 13.1 | 13.1 |
| <i>intF</i>   | 15.6 | 15.5 | 15.1 | 15.3 | 15.1 | 15.6 | 14.9 | 15.0 |
| <i>intG</i>   | 13.0 | 12.9 | 12.8 | 13.2 | 12.8 | 12.9 | 12.8 | 12.8 |
| <i>intQ</i>   | 13.0 | 13.0 | 12.8 | 13.3 | 13.1 | 13.2 | 12.9 | 12.9 |
| <i>intR</i>   | 14.3 | 14.3 | 13.8 | 14.4 | 13.9 | 14.0 | 13.4 | 13.7 |
| <i>intS</i>   | 14.5 | 14.3 | 14.0 | 13.9 | 14.0 | 14.3 | 13.8 | 14.0 |
| <i>intZ</i>   | 14.7 | 14.7 | 14.4 | 14.2 | 14.3 | 14.6 | 14.0 | 14.0 |
| <i>iraD</i>   | 13.6 | 14.2 | 13.5 | 13.0 | 14.7 | 14.9 | 14.5 | 15.1 |
| <i>iraM</i>   | 12.8 | 12.9 | 12.7 | 13.1 | 12.6 | 12.8 | 12.6 | 12.6 |
| <i>iraP</i>   | 17.1 | 17.2 | 16.6 | 16.6 | 16.5 | 17.2 | 16.0 | 16.6 |
| <i>IS128</i>  | 13.0 | 13.0 | 13.0 | 13.0 | 12.9 | 13.2 | 12.8 | 12.9 |
| <i>iscA</i>   | 18.5 | 17.7 | 18.4 | 18.5 | 17.4 | 17.3 | 17.5 | 17.6 |
| <i>iscR</i>   | 17.9 | 18.0 | 18.1 | 17.7 | 15.2 | 16.5 | 15.3 | 15.3 |
| <i>iscS</i>   | 18.5 | 17.6 | 18.4 | 18.6 | 17.1 | 16.6 | 17.2 | 17.3 |
| <i>iscU</i>   | 19.2 | 18.5 | 18.7 | 19.3 | 17.8 | 17.7 | 17.6 | 18.1 |
| <i>iscX</i>   | 17.2 | 15.8 | 16.7 | 17.2 | 16.1 | 15.3 | 16.3 | 16.4 |
| <i>ispA</i>   | 16.0 | 16.0 | 16.0 | 16.0 | 16.0 | 16.0 | 16.1 | 16.0 |
| <i>ispB</i>   | 16.8 | 16.7 | 16.5 | 16.6 | 16.6 | 16.8 | 16.6 | 16.8 |
| <i>ispD</i>   | 15.6 | 15.5 | 15.3 | 15.4 | 15.2 | 15.3 | 15.2 | 15.4 |
| <i>ispE</i>   | 17.2 | 17.2 | 17.6 | 17.0 | 17.5 | 17.4 | 17.6 | 17.4 |
| <i>ispF</i>   | 15.9 | 15.9 | 15.5 | 15.9 | 15.5 | 15.5 | 15.4 | 15.5 |
| <i>ispG</i>   | 16.5 | 16.5 | 16.2 | 16.4 | 16.5 | 16.7 | 16.5 | 16.6 |
| <i>ispH</i>   | 15.7 | 15.4 | 15.5 | 15.5 | 15.5 | 15.8 | 15.7 | 15.7 |
| <i>ispU</i>   | 16.5 | 16.4 | 16.0 | 16.3 | 16.5 | 16.6 | 16.3 | 16.4 |
| <i>isrA</i>   | 14.3 | 14.5 | 14.0 | 13.6 | 14.1 | 14.6 | 13.7 | 13.9 |
| <i>isrB</i>   | 17.6 | 17.8 | 16.1 | 16.5 | 14.3 | 15.8 | 13.6 | 14.5 |
| <i>isrC</i>   | 15.3 | 14.5 | 14.3 | 14.9 | 14.5 | 14.1 | 13.9 | 13.7 |
| <i>istR-1</i> | 13.4 | 13.4 | 13.2 | 13.1 | 13.4 | 13.5 | 13.2 | 13.3 |
| <i>istR-2</i> | 13.1 | 13.1 | 13.0 | 13.1 | 13.1 | 13.2 | 12.9 | 13.1 |
| <i>ivbL</i>   | 18.1 | 17.8 | 18.6 | 17.9 | 17.8 | 17.3 | 16.4 | 16.7 |
| <i>ivy</i>    | 17.5 | 17.2 | 17.1 | 17.2 | 17.8 | 17.2 | 17.2 | 17.6 |
| <i>katE</i>   | 16.6 | 16.0 | 16.2 | 16.7 | 16.2 | 15.6 | 15.9 | 16.2 |
| <i>katG</i>   | 16.4 | 15.3 | 16.7 | 16.4 | 17.1 | 16.0 | 17.2 | 16.9 |
| <i>kbaY</i>   | 12.6 | 12.6 | 12.5 | 12.8 | 12.8 | 12.6 | 12.7 | 12.6 |
| <i>kbaZ</i>   | 12.7 | 12.8 | 12.7 | 13.0 | 12.7 | 12.7 | 12.7 | 12.6 |
| <i>kbl</i>    | 14.5 | 14.4 | 14.3 | 14.2 | 14.4 | 14.6 | 14.4 | 14.4 |
| <i>kch</i>    | 14.9 | 15.1 | 14.3 | 15.0 | 15.5 | 15.7 | 15.0 | 15.6 |
| <i>kdgK</i>   | 14.9 | 14.8 | 14.9 | 14.8 | 15.3 | 15.1 | 15.3 | 15.3 |
| <i>kdgR</i>   | 16.3 | 16.3 | 15.9 | 16.1 | 16.5 | 16.4 | 16.0 | 16.4 |
| <i>kdgT</i>   | 13.1 | 13.2 | 13.1 | 13.4 | 13.1 | 13.0 | 13.0 | 12.9 |
| <i>kdpA</i>   | 12.7 | 12.6 | 12.7 | 13.0 | 12.8 | 12.7 | 12.8 | 12.6 |
| <i>kdpB</i>   | 12.9 | 12.8 | 12.8 | 13.2 | 13.0 | 12.8 | 13.0 | 12.8 |
| <i>kdpC</i>   | 13.9 | 13.9 | 13.7 | 13.4 | 14.8 | 14.0 | 13.7 | 13.8 |
| <i>kdpD</i>   | 13.8 | 13.8 | 13.7 | 13.5 | 13.8 | 13.9 | 13.9 | 13.9 |
| <i>kdpE</i>   | 14.0 | 14.0 | 13.8 | 13.9 | 13.8 | 14.2 | 13.9 | 13.8 |
| <i>kdpF</i>   | 13.6 | 13.5 | 13.5 | 13.5 | 13.8 | 13.5 | 13.7 | 13.3 |
| <i>kdsA</i>   | 17.3 | 17.2 | 17.1 | 17.2 | 17.2 | 17.3 | 17.1 | 17.2 |
| <i>kdsB</i>   | 16.5 | 16.5 | 16.3 | 16.6 | 16.4 | 16.5 | 16.4 | 16.7 |
| <i>kdsC</i>   | 16.5 | 16.2 | 16.1 | 16.4 | 16.6 | 16.4 | 16.3 | 16.6 |
| <i>kdsD</i>   | 16.5 | 16.2 | 16.1 | 16.3 | 16.4 | 16.5 | 16.3 | 16.4 |
| <i>kduD</i>   | 14.0 | 13.7 | 13.7 | 13.9 | 13.9 | 13.8 | 13.7 | 13.7 |
| <i>kduI</i>   | 13.5 | 13.5 | 13.4 | 13.3 | 13.4 | 13.4 | 13.3 | 13.3 |
| <i>kefA</i>   | 14.7 | 14.7 | 14.3 | 14.3 | 14.4 | 14.9 | 14.5 | 14.7 |
| <i>kefB</i>   | 14.2 | 14.1 | 14.0 | 13.9 | 13.3 | 13.3 | 13.3 | 13.1 |
| <i>kefC</i>   | 14.0 | 13.9 | 13.8 | 13.9 | 13.9 | 13.7 | 13.8 | 13.9 |
| <i>kefF</i>   | 14.1 | 14.1 | 13.8 | 13.6 | 13.6 | 13.8 | 13.7 | 13.9 |



|             |      |      |      |      |      |      |      |      |
|-------------|------|------|------|------|------|------|------|------|
| <i>kefG</i> | 14.5 | 14.5 | 14.3 | 14.0 | 13.4 | 13.4 | 13.3 | 13.2 |
| <i>kgtP</i> | 18.7 | 19.0 | 18.5 | 18.8 | 15.7 | 16.6 | 15.8 | 16.1 |
| <i>kilR</i> | 12.8 | 13.1 | 12.8 | 12.9 | 13.2 | 13.4 | 12.8 | 13.0 |
| <i>kptA</i> | 13.6 | 13.9 | 13.6 | 13.2 | 13.8 | 14.0 | 13.6 | 13.7 |
| <i>kup</i>  | 14.6 | 14.5 | 14.3 | 14.6 | 14.5 | 14.7 | 14.5 | 14.7 |
| <i>lacA</i> | 13.2 | 13.1 | 13.0 | 13.2 | 13.1 | 13.2 | 13.0 | 13.0 |
| <i>lacI</i> | 14.6 | 14.6 | 14.5 | 14.3 | 14.6 | 14.6 | 14.5 | 14.4 |
| <i>lacY</i> | 13.0 | 13.0 | 12.9 | 13.1 | 13.2 | 13.0 | 13.1 | 12.7 |
| <i>lacZ</i> | 12.7 | 12.7 | 12.7 | 12.9 | 12.8 | 12.7 | 12.8 | 12.5 |
| <i>lafU</i> | 13.1 | 13.0 | 12.8 | 13.3 | 13.1 | 13.0 | 13.0 | 12.7 |
| <i>lamB</i> | 15.2 | 15.1 | 16.3 | 15.1 | 13.3 | 13.8 | 13.4 | 13.2 |
| <i>lar</i>  | 13.8 | 13.7 | 13.2 | 13.7 | 13.5 | 13.6 | 13.1 | 13.0 |
| <i>ldcA</i> | 14.9 | 14.9 | 14.6 | 14.3 | 14.9 | 15.3 | 15.0 | 15.1 |
| <i>ldcC</i> | 14.6 | 14.5 | 14.2 | 14.4 | 14.3 | 14.3 | 14.2 | 14.3 |
| <i>ldhA</i> | 15.7 | 15.8 | 15.4 | 15.6 | 16.0 | 16.1 | 16.1 | 16.4 |
| <i>ldrA</i> | 13.8 | 13.8 | 14.0 | 13.4 | 14.9 | 14.6 | 14.7 | 15.4 |
| <i>ldrB</i> | 13.7 | 13.7 | 14.0 | 13.6 | 14.3 | 14.3 | 14.3 | 14.6 |
| <i>ldrC</i> | 13.8 | 13.7 | 14.0 | 13.4 | 14.7 | 14.5 | 14.4 | 15.0 |
| <i>ldrD</i> | 14.3 | 14.3 | 14.1 | 14.0 | 14.0 | 14.2 | 14.0 | 14.5 |
| <i>lepA</i> | 16.6 | 16.6 | 16.5 | 16.6 | 16.5 | 16.5 | 16.6 | 16.6 |
| <i>lepB</i> | 16.0 | 16.0 | 15.8 | 16.1 | 15.9 | 16.0 | 15.9 | 16.1 |
| <i>leuA</i> | 18.3 | 18.2 | 18.4 | 18.2 | 18.6 | 18.6 | 18.6 | 18.5 |
| <i>leuB</i> | 18.4 | 18.0 | 18.8 | 18.4 | 18.9 | 18.4 | 19.1 | 18.9 |
| <i>leuC</i> | 18.5 | 18.2 | 18.7 | 18.6 | 18.8 | 18.7 | 19.0 | 18.8 |
| <i>leuD</i> | 18.5 | 18.2 | 18.6 | 18.4 | 18.6 | 18.6 | 18.8 | 18.9 |
| <i>leuE</i> | 13.5 | 13.5 | 13.4 | 13.5 | 13.8 | 14.2 | 14.0 | 13.9 |
| <i>leuL</i> | 18.3 | 18.3 | 17.9 | 17.7 | 18.3 | 19.0 | 17.7 | 18.2 |
| <i>leuO</i> | 13.2 | 13.1 | 12.9 | 13.3 | 13.1 | 13.3 | 13.0 | 13.0 |
| <i>leuP</i> | 19.2 | 19.0 | 19.0 | 19.3 | 19.3 | 18.7 | 18.2 | 19.1 |
| <i>leuQ</i> | 18.9 | 18.7 | 19.0 | 19.1 | 19.2 | 18.6 | 18.3 | 19.2 |
| <i>leuS</i> | 17.1 | 17.0 | 17.0 | 17.2 | 17.2 | 16.9 | 17.2 | 17.1 |
| <i>leuT</i> | 19.4 | 19.2 | 18.6 | 19.6 | 19.2 | 18.9 | 18.3 | 19.3 |
| <i>leuU</i> | 17.1 | 17.0 | 16.8 | 16.2 | 16.7 | 16.3 | 16.1 | 16.2 |
| <i>leuV</i> | 18.2 | 18.0 | 18.1 | 17.8 | 18.7 | 17.9 | 17.5 | 18.0 |
| <i>leuW</i> | 18.8 | 18.5 | 18.8 | 18.1 | 18.9 | 18.5 | 18.4 | 18.5 |
| <i>leuX</i> | 15.9 | 16.8 | 15.1 | 14.9 | 15.8 | 17.0 | 14.3 | 15.1 |
| <i>leuZ</i> | 17.2 | 17.8 | 17.3 | 16.7 | 17.5 | 17.4 | 16.5 | 17.0 |
| <i>lexA</i> | 15.9 | 16.3 | 15.9 | 15.5 | 15.8 | 16.1 | 15.6 | 15.8 |
| <i>lfhA</i> | 12.9 | 13.0 | 12.8 | 13.3 | 13.1 | 12.9 | 13.0 | 12.7 |
| <i>lgt</i>  | 16.1 | 16.1 | 16.0 | 15.9 | 16.0 | 16.1 | 16.0 | 16.1 |
| <i>lhgO</i> | 14.4 | 14.3 | 14.2 | 14.0 | 13.7 | 13.7 | 13.5 | 13.6 |
| <i>lhr</i>  | 13.5 | 13.5 | 13.4 | 13.4 | 13.6 | 13.7 | 13.7 | 13.6 |
| <i>ligA</i> | 15.0 | 14.9 | 14.7 | 14.8 | 14.8 | 14.8 | 15.0 | 14.9 |
| <i>ligB</i> | 13.0 | 13.0 | 12.8 | 13.3 | 13.1 | 13.0 | 12.9 | 12.8 |
| <i>ligT</i> | 14.6 | 14.6 | 14.5 | 14.1 | 14.1 | 14.7 | 14.3 | 14.4 |
| <i>lipA</i> | 16.0 | 15.6 | 16.1 | 15.8 | 15.8 | 15.7 | 16.3 | 16.2 |
| <i>lipB</i> | 15.4 | 15.3 | 15.2 | 15.0 | 15.3 | 15.3 | 15.0 | 15.2 |
| <i>lit</i>  | 14.3 | 14.5 | 13.9 | 13.7 | 14.0 | 14.4 | 13.7 | 13.8 |
| <i>livF</i> | 17.1 | 17.3 | 16.9 | 17.0 | 16.4 | 16.8 | 16.4 | 16.3 |
| <i>livG</i> | 17.2 | 17.3 | 17.1 | 17.1 | 16.6 | 16.8 | 16.6 | 16.5 |
| <i>livH</i> | 16.8 | 17.0 | 17.0 | 16.9 | 16.5 | 16.4 | 16.4 | 16.2 |
| <i>livJ</i> | 19.1 | 19.2 | 19.4 | 19.1 | 18.8 | 18.6 | 18.4 | 18.4 |
| <i>livK</i> | 17.8 | 17.8 | 17.9 | 17.9 | 17.5 | 17.4 | 17.4 | 17.0 |
| <i>livM</i> | 16.9 | 17.0 | 17.1 | 17.0 | 16.5 | 16.4 | 16.4 | 16.4 |
| <i>lldD</i> | 14.7 | 14.8 | 14.6 | 14.3 | 13.1 | 13.0 | 13.1 | 13.0 |
| <i>lldP</i> | 13.8 | 13.9 | 14.0 | 13.5 | 12.7 | 12.7 | 12.7 | 12.6 |
| <i>lldR</i> | 14.4 | 14.5 | 14.3 | 14.1 | 13.0 | 13.1 | 13.0 | 13.0 |
| <i>lnt</i>  | 14.8 | 14.7 | 14.8 | 14.4 | 14.6 | 14.8 | 14.9 | 14.9 |
| <i>lolA</i> | 16.6 | 16.7 | 16.3 | 16.4 | 16.4 | 16.8 | 16.4 | 16.3 |
| <i>lolB</i> | 16.5 | 16.5 | 16.2 | 16.3 | 16.2 | 16.6 | 16.4 | 16.4 |
| <i>lolC</i> | 15.2 | 15.3 | 15.0 | 14.7 | 15.2 | 15.4 | 15.1 | 15.3 |

|               |      |      |      |      |      |      |      |      |
|---------------|------|------|------|------|------|------|------|------|
| <i>lolD</i>   | 15.2 | 15.4 | 15.0 | 14.8 | 15.0 | 15.4 | 15.0 | 15.3 |
| <i>lolE</i>   | 15.2 | 15.3 | 15.0 | 15.0 | 15.4 | 15.4 | 15.1 | 15.4 |
| <i>lomR_1</i> | 14.1 | 14.3 | 13.5 | 13.9 | 14.7 | 14.3 | 14.1 | 13.1 |
| <i>lomR_2</i> | 13.3 | 13.2 | 13.2 | 14.0 | 13.4 | 13.3 | 13.4 | 13.0 |
| <i>lon</i>    | 17.0 | 16.8 | 16.8 | 17.0 | 16.8 | 16.9 | 16.8 | 17.0 |
| <i>lpcA</i>   | 16.8 | 16.8 | 16.8 | 16.6 | 16.7 | 16.7 | 16.7 | 16.7 |
| <i>lpd</i>    | 18.9 | 18.8 | 19.1 | 19.1 | 17.2 | 17.4 | 17.3 | 17.3 |
| <i>lplA</i>   | 14.5 | 14.4 | 14.5 | 14.1 | 14.2 | 14.4 | 14.4 | 14.2 |
| <i>lplT</i>   | 13.7 | 13.6 | 13.6 | 13.5 | 13.8 | 13.6 | 13.7 | 13.8 |
| <i>lpoA</i>   | 15.8 | 15.8 | 15.7 | 15.6 | 15.4 | 15.8 | 15.6 | 15.7 |
| <i>lpoB</i>   | 16.5 | 16.4 | 16.7 | 16.5 | 16.8 | 16.5 | 17.1 | 17.1 |
| <i>lpp</i>    | 20.0 | 19.9 | 20.0 | 19.9 | 20.3 | 20.1 | 19.8 | 20.1 |
| <i>lptA</i>   | 16.9 | 16.8 | 16.6 | 16.9 | 16.7 | 16.8 | 16.5 | 16.6 |
| <i>lptB</i>   | 16.1 | 16.1 | 16.0 | 16.2 | 16.0 | 16.1 | 16.1 | 16.1 |
| <i>lptC</i>   | 16.7 | 16.6 | 16.3 | 16.7 | 16.6 | 16.8 | 16.4 | 16.6 |
| <i>lptD</i>   | 17.1 | 17.1 | 17.0 | 17.1 | 17.1 | 17.3 | 17.1 | 17.0 |
| <i>lptE</i>   | 17.1 | 16.9 | 16.9 | 17.0 | 17.1 | 17.1 | 17.0 | 17.2 |
| <i>lptF</i>   | 15.6 | 15.5 | 15.5 | 15.3 | 15.4 | 15.5 | 15.3 | 15.4 |
| <i>lptG</i>   | 15.0 | 15.0 | 14.8 | 14.8 | 14.8 | 14.9 | 14.8 | 14.9 |
| <i>lpxA</i>   | 16.6 | 16.4 | 16.4 | 16.7 | 16.6 | 16.5 | 16.8 | 16.8 |
| <i>lpxB</i>   | 15.2 | 15.2 | 15.0 | 15.1 | 15.2 | 15.4 | 15.2 | 15.4 |
| <i>lpxC</i>   | 18.0 | 18.0 | 17.8 | 17.9 | 18.2 | 18.3 | 18.1 | 18.4 |
| <i>lpxD</i>   | 17.7 | 17.7 | 17.4 | 17.8 | 18.0 | 17.8 | 17.8 | 18.0 |
| <i>lpxH</i>   | 15.4 | 15.3 | 15.1 | 15.3 | 14.9 | 15.2 | 15.1 | 15.2 |
| <i>lpxK</i>   | 14.6 | 14.7 | 14.3 | 14.6 | 14.5 | 14.7 | 14.5 | 14.5 |
| <i>lpxL</i>   | 14.9 | 14.9 | 14.8 | 14.4 | 14.9 | 15.3 | 15.0 | 15.1 |
| <i>lpxM</i>   | 15.5 | 15.3 | 15.1 | 15.0 | 15.3 | 15.4 | 15.1 | 15.3 |
| <i>lpxP</i>   | 13.4 | 13.2 | 13.0 | 13.2 | 13.3 | 13.6 | 13.4 | 13.3 |
| <i>lpxT</i>   | 14.6 | 14.5 | 14.3 | 14.2 | 13.7 | 14.1 | 13.7 | 14.0 |
| <i>lrhA</i>   | 15.6 | 15.5 | 15.4 | 15.2 | 16.4 | 17.0 | 16.1 | 16.4 |
| <i>lrp</i>    | 18.7 | 18.6 | 18.5 | 18.6 | 18.8 | 18.5 | 18.6 | 18.5 |
| <i>lspA</i>   | 16.6 | 16.6 | 16.6 | 16.7 | 16.9 | 16.9 | 17.1 | 17.2 |
| <i>lsrA</i>   | 12.8 | 12.7 | 12.7 | 13.0 | 12.8 | 12.8 | 12.7 | 12.6 |
| <i>lsrB</i>   | 13.4 | 13.4 | 13.3 | 13.4 | 13.3 | 13.5 | 13.3 | 13.2 |
| <i>lsrC</i>   | 12.9 | 12.9 | 12.9 | 13.1 | 13.2 | 12.9 | 13.0 | 12.7 |
| <i>lsrD</i>   | 12.7 | 12.8 | 12.7 | 12.9 | 12.8 | 12.9 | 12.8 | 12.7 |
| <i>lsrF</i>   | 13.5 | 13.5 | 13.4 | 13.5 | 13.5 | 13.5 | 13.5 | 13.3 |
| <i>lsrG</i>   | 14.0 | 14.1 | 13.7 | 14.0 | 13.7 | 14.2 | 13.9 | 14.0 |
| <i>lsrK</i>   | 13.4 | 13.5 | 13.3 | 13.6 | 13.3 | 13.5 | 13.3 | 13.3 |
| <i>lsrR</i>   | 14.0 | 14.0 | 13.8 | 13.6 | 14.1 | 14.0 | 13.8 | 13.8 |
| <i>ltaE</i>   | 15.7 | 15.7 | 15.7 | 15.5 | 15.8 | 15.8 | 15.9 | 15.7 |
| <i>luxS</i>   | 17.6 | 17.8 | 17.3 | 17.5 | 17.8 | 17.7 | 17.4 | 17.9 |
| <i>lysA</i>   | 15.8 | 15.7 | 15.7 | 15.6 | 15.6 | 15.4 | 15.4 | 15.6 |
| <i>lysC</i>   | 17.6 | 17.7 | 17.6 | 17.4 | 17.1 | 17.3 | 17.3 | 17.6 |
| <i>lysP</i>   | 17.2 | 17.1 | 17.3 | 17.2 | 16.5 | 16.6 | 16.7 | 16.6 |
| <i>lysQ</i>   | 20.2 | 20.1 | 19.7 | 20.2 | 19.9 | 20.2 | 19.6 | 19.8 |
| <i>lysR</i>   | 13.6 | 13.6 | 13.5 | 13.5 | 13.4 | 13.6 | 13.4 | 13.5 |
| <i>lysS</i>   | 17.6 | 17.5 | 17.5 | 17.7 | 17.4 | 17.5 | 17.6 | 17.7 |
| <i>lysT</i>   | 20.9 | 20.9 | 20.6 | 20.8 | 20.8 | 21.0 | 20.6 | 21.0 |
| <i>lysU</i>   | 15.4 | 15.3 | 15.0 | 15.4 | 15.2 | 15.3 | 15.0 | 15.2 |
| <i>lysV</i>   | 20.4 | 20.4 | 20.4 | 20.1 | 20.4 | 20.6 | 20.2 | 20.4 |
| <i>lysW</i>   | 20.6 | 20.6 | 20.6 | 20.5 | 20.4 | 20.8 | 20.5 | 20.7 |
| <i>lysY</i>   | 20.9 | 20.8 | 20.5 | 20.7 | 20.6 | 20.9 | 20.6 | 20.8 |
| <i>lysZ</i>   | 20.6 | 20.6 | 20.3 | 20.5 | 20.6 | 20.8 | 20.4 | 20.5 |
| <i>lyxK</i>   | 12.9 | 12.9 | 12.7 | 12.9 | 12.9 | 12.9 | 12.9 | 12.7 |
| <i>maa</i>    | 15.1 | 14.8 | 14.7 | 14.7 | 14.4 | 14.4 | 14.2 | 14.4 |
| <i>macA</i>   | 15.2 | 15.2 | 14.9 | 15.0 | 15.0 | 15.3 | 15.0 | 15.1 |
| <i>macB</i>   | 14.3 | 14.2 | 14.2 | 14.2 | 14.3 | 14.4 | 14.3 | 14.3 |
| <i>maeA</i>   | 16.9 | 16.7 | 17.0 | 16.8 | 16.0 | 16.1 | 16.0 | 15.9 |
| <i>maeB</i>   | 16.5 | 16.4 | 16.6 | 16.6 | 15.0 | 15.2 | 15.0 | 15.1 |
| <i>mak</i>    | 15.0 | 14.8 | 14.8 | 14.8 | 15.3 | 14.8 | 14.9 | 15.0 |

|             |      |      |      |      |      |      |      |      |
|-------------|------|------|------|------|------|------|------|------|
| <i>malE</i> | 16.3 | 16.0 | 17.0 | 16.1 | 14.1 | 14.9 | 14.3 | 13.9 |
| <i>malF</i> | 14.0 | 13.8 | 14.4 | 13.7 | 13.1 | 13.3 | 13.2 | 12.9 |
| <i>malG</i> | 13.8 | 13.6 | 14.2 | 13.4 | 13.0 | 13.1 | 13.1 | 13.0 |
| <i>malI</i> | 13.5 | 13.5 | 13.4 | 13.6 | 13.8 | 13.5 | 13.6 | 13.4 |
| <i>malK</i> | 14.4 | 14.3 | 15.2 | 14.0 | 13.2 | 13.4 | 13.2 | 12.8 |
| <i>malM</i> | 14.7 | 14.6 | 15.7 | 14.4 | 13.1 | 13.5 | 13.2 | 12.9 |
| <i>malP</i> | 16.2 | 16.2 | 16.4 | 16.1 | 15.5 | 15.5 | 15.3 | 15.2 |
| <i>malQ</i> | 15.1 | 15.1 | 15.3 | 14.9 | 14.7 | 14.5 | 14.5 | 14.4 |
| <i>malS</i> | 13.3 | 13.2 | 13.3 | 13.1 | 13.1 | 13.1 | 13.0 | 12.8 |
| <i>malT</i> | 15.9 | 15.9 | 16.2 | 15.7 | 15.2 | 15.6 | 15.5 | 15.4 |
| <i>malX</i> | 13.7 | 13.6 | 13.4 | 13.5 | 13.4 | 13.7 | 13.4 | 13.6 |
| <i>malY</i> | 14.8 | 14.7 | 14.5 | 14.3 | 14.6 | 15.0 | 14.8 | 14.9 |
| <i>malZ</i> | 14.0 | 14.2 | 13.9 | 13.9 | 14.0 | 14.1 | 13.9 | 13.9 |
| <i>manA</i> | 16.2 | 16.1 | 15.9 | 16.0 | 16.6 | 16.9 | 16.8 | 16.7 |
| <i>manX</i> | 18.5 | 18.0 | 18.3 | 18.5 | 18.4 | 18.2 | 18.4 | 18.3 |
| <i>manY</i> | 18.1 | 17.9 | 18.5 | 18.4 | 18.6 | 18.1 | 18.8 | 18.4 |
| <i>manZ</i> | 17.4 | 17.1 | 17.7 | 17.7 | 17.9 | 17.2 | 18.0 | 17.7 |
| <i>map</i>  | 17.3 | 17.7 | 17.3 | 17.1 | 16.6 | 17.7 | 17.3 | 16.7 |
| <i>marA</i> | 15.8 | 16.6 | 16.2 | 15.4 | 14.4 | 15.2 | 14.3 | 14.3 |
| <i>marB</i> | 14.0 | 14.6 | 14.3 | 13.8 | 12.9 | 13.5 | 13.1 | 13.2 |
| <i>marC</i> | 14.0 | 14.1 | 13.8 | 13.6 | 14.2 | 14.3 | 14.0 | 14.4 |
| <i>marR</i> | 14.9 | 15.4 | 15.2 | 14.2 | 14.3 | 14.6 | 14.0 | 13.9 |
| <i>matA</i> | 13.1 | 13.2 | 12.9 | 13.0 | 13.4 | 13.2 | 13.1 | 13.0 |
| <i>matB</i> | 13.4 | 13.3 | 13.3 | 13.3 | 13.8 | 13.7 | 13.7 | 13.3 |
| <i>matC</i> | 12.9 | 12.9 | 12.8 | 13.1 | 13.0 | 13.0 | 13.1 | 12.9 |
| <i>matP</i> | 15.8 | 15.8 | 15.3 | 15.6 | 15.5 | 15.8 | 15.0 | 15.6 |
| <i>mazG</i> | 15.4 | 15.4 | 14.8 | 15.2 | 15.1 | 15.4 | 14.8 | 15.2 |
| <i>mcbA</i> | 14.4 | 14.7 | 13.9 | 14.0 | 14.1 | 14.4 | 13.8 | 14.2 |
| <i>mcbR</i> | 14.0 | 14.0 | 13.4 | 13.7 | 13.4 | 13.6 | 13.1 | 13.1 |
| <i>mcrA</i> | 13.5 | 13.6 | 13.2 | 13.6 | 13.5 | 13.6 | 13.1 | 13.3 |
| <i>mcrB</i> | 14.8 | 14.5 | 14.3 | 14.3 | 14.5 | 14.4 | 14.1 | 14.2 |
| <i>mcrC</i> | 13.6 | 13.4 | 13.3 | 13.7 | 13.4 | 13.4 | 13.2 | 13.3 |
| <i>mdaB</i> | 16.3 | 16.5 | 16.1 | 16.1 | 15.8 | 16.2 | 15.9 | 16.1 |
| <i>mdh</i>  | 19.3 | 19.2 | 19.6 | 19.3 | 16.3 | 16.7 | 16.4 | 16.6 |
| <i>mdlA</i> | 13.4 | 13.4 | 13.3 | 13.4 | 13.4 | 13.4 | 13.4 | 13.3 |
| <i>mdlB</i> | 13.2 | 13.3 | 13.2 | 13.2 | 13.2 | 13.2 | 13.2 | 13.1 |
| <i>mdoB</i> | 14.6 | 14.4 | 14.3 | 14.1 | 14.3 | 14.5 | 14.2 | 14.3 |
| <i>mdoC</i> | 14.4 | 14.1 | 13.9 | 13.8 | 13.4 | 13.8 | 13.3 | 13.5 |
| <i>mdoD</i> | 15.2 | 15.1 | 14.9 | 14.9 | 15.0 | 15.1 | 15.0 | 15.3 |
| <i>mdoG</i> | 17.7 | 17.6 | 17.3 | 17.6 | 17.5 | 17.6 | 17.3 | 17.5 |
| <i>mdoH</i> | 15.9 | 15.8 | 15.9 | 15.8 | 15.8 | 15.7 | 15.9 | 15.9 |
| <i>mdtA</i> | 13.8 | 14.2 | 14.2 | 13.7 | 13.7 | 13.8 | 13.8 | 13.5 |
| <i>mdtB</i> | 13.3 | 13.5 | 13.4 | 13.6 | 13.1 | 13.2 | 13.2 | 13.2 |
| <i>mdtC</i> | 13.1 | 13.2 | 13.2 | 13.0 | 13.1 | 13.1 | 13.1 | 13.0 |
| <i>mdtD</i> | 13.0 | 13.2 | 13.2 | 12.7 | 13.1 | 13.1 | 13.1 | 13.0 |
| <i>mdtE</i> | 14.3 | 14.3 | 13.9 | 14.2 | 16.8 | 16.4 | 16.8 | 17.4 |
| <i>mdtF</i> | 13.9 | 13.9 | 13.6 | 13.6 | 16.5 | 15.9 | 16.4 | 16.9 |
| <i>mdtG</i> | 13.4 | 13.3 | 13.3 | 13.2 | 13.5 | 13.9 | 13.6 | 13.6 |
| <i>mdtH</i> | 13.1 | 13.2 | 13.1 | 13.2 | 13.5 | 13.4 | 13.7 | 13.5 |
| <i>mdtI</i> | 13.6 | 13.2 | 13.2 | 13.1 | 13.1 | 13.0 | 13.1 | 12.9 |
| <i>mdtJ</i> | 14.3 | 13.8 | 13.7 | 14.3 | 13.9 | 13.4 | 13.6 | 13.1 |
| <i>mdtK</i> | 14.8 | 14.5 | 14.5 | 14.4 | 14.9 | 15.0 | 15.1 | 15.2 |
| <i>mdtL</i> | 13.1 | 13.1 | 13.0 | 13.0 | 12.9 | 13.0 | 12.9 | 12.9 |
| <i>mdtM</i> | 13.2 | 13.2 | 13.1 | 12.9 | 13.6 | 14.1 | 13.8 | 13.8 |
| <i>mdtQ</i> | 12.8 | 12.8 | 12.7 | 13.1 | 12.9 | 12.9 | 12.9 | 12.8 |
| <i>melA</i> | 13.3 | 13.3 | 13.2 | 13.4 | 13.2 | 13.3 | 13.2 | 13.2 |
| <i>melB</i> | 13.2 | 13.1 | 13.0 | 13.0 | 13.0 | 13.2 | 13.0 | 13.0 |
| <i>melR</i> | 13.8 | 13.7 | 13.5 | 13.6 | 13.3 | 13.7 | 13.4 | 13.4 |
| <i>menA</i> | 14.7 | 14.6 | 14.6 | 14.3 | 14.4 | 14.3 | 14.3 | 14.3 |
| <i>menB</i> | 15.8 | 15.5 | 15.5 | 15.7 | 16.0 | 15.9 | 15.9 | 16.2 |
| <i>menC</i> | 14.8 | 14.6 | 14.6 | 14.6 | 15.1 | 14.7 | 15.1 | 15.3 |

|              |      |      |      |      |      |      |      |      |
|--------------|------|------|------|------|------|------|------|------|
| <i>menD</i>  | 13.8 | 13.6 | 13.7 | 13.5 | 14.3 | 14.3 | 14.4 | 14.2 |
| <i>menE</i>  | 13.9 | 13.6 | 13.7 | 13.8 | 14.2 | 13.8 | 14.1 | 14.1 |
| <i>menF</i>  | 14.9 | 14.9 | 14.6 | 14.4 | 15.0 | 15.1 | 14.9 | 15.0 |
| <i>menH</i>  | 14.4 | 14.1 | 14.1 | 14.6 | 14.6 | 14.5 | 14.6 | 14.5 |
| <i>mepA</i>  | 15.7 | 15.7 | 15.6 | 15.7 | 15.2 | 15.7 | 15.5 | 15.7 |
| <i>metA</i>  | 17.2 | 17.1 | 17.2 | 17.2 | 17.5 | 17.5 | 17.3 | 17.6 |
| <i>metB</i>  | 16.2 | 16.5 | 16.5 | 16.2 | 16.2 | 16.4 | 16.0 | 16.1 |
| <i>metC</i>  | 17.0 | 17.0 | 16.7 | 17.0 | 17.0 | 17.1 | 17.1 | 17.1 |
| <i>metE</i>  | 19.5 | 19.7 | 20.2 | 19.6 | 19.4 | 19.2 | 19.7 | 19.2 |
| <i>metF</i>  | 17.5 | 17.2 | 17.3 | 17.6 | 18.1 | 17.4 | 17.5 | 18.3 |
| <i>metG</i>  | 17.1 | 17.0 | 16.9 | 17.1 | 17.0 | 17.2 | 17.2 | 17.1 |
| <i>metH</i>  | 16.2 | 15.6 | 16.0 | 16.2 | 16.0 | 15.6 | 15.8 | 15.9 |
| <i>metI</i>  | 17.7 | 17.7 | 17.8 | 17.6 | 18.1 | 18.0 | 18.1 | 18.1 |
| <i>metJ</i>  | 17.4 | 17.2 | 17.2 | 17.0 | 17.8 | 17.7 | 17.4 | 17.6 |
| <i>metK</i>  | 18.7 | 18.7 | 18.8 | 18.7 | 18.9 | 18.9 | 19.2 | 19.3 |
| <i>metL</i>  | 15.4 | 15.5 | 15.8 | 15.2 | 15.2 | 15.4 | 15.3 | 15.3 |
| <i>metN</i>  | 16.9 | 17.1 | 17.0 | 16.8 | 17.5 | 17.4 | 17.6 | 17.7 |
| <i>metQ</i>  | 19.1 | 19.0 | 19.1 | 19.1 | 19.2 | 19.0 | 19.2 | 19.2 |
| <i>metR</i>  | 15.5 | 15.1 | 15.3 | 15.0 | 15.1 | 15.4 | 15.1 | 15.5 |
| <i>metT</i>  | 19.5 | 19.3 | 19.5 | 18.9 | 19.6 | 19.7 | 19.3 | 19.5 |
| <i>metU</i>  | 19.2 | 19.3 | 18.9 | 19.0 | 19.0 | 19.0 | 18.6 | 18.8 |
| <i>metV</i>  | 20.2 | 20.0 | 20.4 | 20.6 | 20.1 | 19.9 | 19.5 | 20.3 |
| <i>metW</i>  | 20.7 | 20.5 | 20.8 | 20.6 | 20.4 | 20.4 | 19.9 | 20.4 |
| <i>metY</i>  | 20.1 | 19.8 | 20.0 | 20.0 | 19.8 | 19.9 | 19.5 | 19.9 |
| <i>metZ</i>  | 20.2 | 19.8 | 20.0 | 19.7 | 19.7 | 20.1 | 19.3 | 20.1 |
| <i>mfd</i>   | 15.6 | 15.6 | 15.4 | 15.5 | 15.4 | 15.6 | 15.5 | 15.6 |
| <i>mgIA</i>  | 14.4 | 14.0 | 14.5 | 14.2 | 12.7 | 12.8 | 12.7 | 12.7 |
| <i>mgIB</i>  | 15.5 | 15.0 | 15.7 | 15.6 | 13.0 | 13.0 | 12.9 | 13.0 |
| <i>mgIC</i>  | 14.1 | 13.8 | 14.5 | 14.0 | 13.1 | 12.8 | 12.9 | 12.7 |
| <i>mgrB</i>  | 16.2 | 16.4 | 15.7 | 15.7 | 16.1 | 16.5 | 15.6 | 16.2 |
| <i>mgrR</i>  | 18.5 | 18.1 | 17.7 | 17.1 | 18.4 | 18.6 | 16.7 | 17.2 |
| <i>mgsA</i>  | 16.5 | 16.8 | 16.5 | 16.4 | 16.8 | 17.0 | 16.8 | 16.7 |
| <i>mgtA</i>  | 14.9 | 15.0 | 14.6 | 14.9 | 14.9 | 15.5 | 15.2 | 14.7 |
| <i>mgtL</i>  | 17.9 | 17.8 | 17.8 | 17.1 | 18.1 | 18.3 | 17.6 | 17.9 |
| <i>mhpA</i>  | 12.9 | 12.9 | 12.7 | 13.2 | 12.9 | 12.7 | 12.8 | 12.6 |
| <i>mhpB</i>  | 12.9 | 12.8 | 12.7 | 12.8 | 12.7 | 12.7 | 12.7 | 12.6 |
| <i>mhpC</i>  | 13.1 | 13.0 | 13.0 | 13.1 | 12.8 | 12.7 | 12.8 | 12.6 |
| <i>mhpD</i>  | 13.0 | 12.9 | 12.9 | 13.4 | 13.1 | 12.9 | 12.9 | 12.6 |
| <i>mhpE</i>  | 13.1 | 13.2 | 13.1 | 13.1 | 13.2 | 13.0 | 13.1 | 12.8 |
| <i>mhpF</i>  | 13.1 | 13.1 | 13.0 | 13.4 | 13.1 | 13.0 | 13.0 | 12.9 |
| <i>mhpR</i>  | 14.8 | 14.5 | 14.7 | 14.3 | 12.9 | 12.9 | 12.9 | 12.8 |
| <i>mhpT</i>  | 13.0 | 13.0 | 13.1 | 13.5 | 13.1 | 13.1 | 13.1 | 12.9 |
| <i>miaA</i>  | 17.4 | 17.3 | 17.1 | 17.1 | 17.9 | 17.6 | 17.3 | 17.2 |
| <i>miaB</i>  | 16.3 | 15.8 | 16.1 | 16.2 | 16.0 | 15.8 | 16.0 | 16.2 |
| <i>micA</i>  | 13.8 | 14.4 | 13.7 | 13.5 | 13.6 | 13.7 | 13.4 | 14.0 |
| <i>micC</i>  | 13.4 | 13.5 | 13.0 | 13.0 | 13.1 | 13.3 | 13.0 | 13.1 |
| <i>micF</i>  | 15.0 | 15.2 | 14.9 | 13.4 | 14.2 | 15.0 | 13.4 | 14.4 |
| <i>micM</i>  | 14.6 | 14.5 | 14.0 | 13.6 | 14.2 | 15.2 | 13.8 | 13.9 |
| <i>minC</i>  | 17.7 | 17.7 | 17.4 | 17.4 | 17.7 | 17.8 | 17.4 | 17.4 |
| <i>minD</i>  | 17.9 | 17.8 | 17.6 | 17.8 | 17.8 | 18.0 | 17.7 | 17.8 |
| <i>minE</i>  | 18.3 | 18.2 | 17.5 | 18.3 | 17.4 | 18.3 | 17.4 | 17.9 |
| <i>mioC</i>  | 17.3 | 17.3 | 17.0 | 16.6 | 16.8 | 16.8 | 16.5 | 16.6 |
| <i>mipA</i>  | 18.0 | 17.8 | 18.1 | 18.0 | 17.8 | 17.4 | 17.7 | 17.5 |
| <i>mIaA</i>  | 16.3 | 16.2 | 16.2 | 16.2 | 15.9 | 15.8 | 15.8 | 15.9 |
| <i>mIaB</i>  | 16.0 | 15.8 | 16.1 | 16.0 | 16.0 | 16.1 | 16.2 | 16.1 |
| <i>mIaC</i>  | 16.8 | 16.9 | 16.8 | 17.0 | 17.0 | 16.9 | 17.0 | 17.0 |
| <i>mIaD</i>  | 16.4 | 16.4 | 16.4 | 16.5 | 16.5 | 16.4 | 16.4 | 16.3 |
| <i>mIaE</i>  | 15.7 | 15.8 | 16.0 | 15.6 | 16.1 | 15.8 | 16.0 | 16.0 |
| <i>mIaF</i>  | 15.5 | 15.6 | 15.4 | 15.4 | 15.8 | 15.6 | 15.7 | 15.6 |
| <i>mIiC</i>  | 14.3 | 14.2 | 13.9 | 13.7 | 14.1 | 14.3 | 14.1 | 14.5 |
| <i>mIraA</i> | 14.7 | 14.8 | 14.2 | 14.4 | 14.4 | 14.7 | 14.2 | 14.6 |

|               |      |      |      |      |      |      |      |      |
|---------------|------|------|------|------|------|------|------|------|
| <i>mltA</i>   | 15.7 | 15.7 | 15.5 | 15.4 | 15.5 | 15.7 | 15.3 | 15.5 |
| <i>mltB</i>   | 15.0 | 14.9 | 14.7 | 14.5 | 14.6 | 14.8 | 14.5 | 14.7 |
| <i>mltC</i>   | 15.3 | 15.2 | 15.0 | 15.1 | 14.6 | 15.0 | 14.6 | 14.8 |
| <i>mltD</i>   | 17.0 | 17.0 | 16.7 | 17.0 | 16.8 | 17.0 | 16.5 | 16.7 |
| <i>mltF</i>   | 13.5 | 13.6 | 13.4 | 13.2 | 13.7 | 13.4 | 13.2 | 13.1 |
| <i>mmuM</i>   | 14.2 | 14.4 | 14.4 | 14.1 | 14.1 | 14.3 | 14.1 | 14.1 |
| <i>mmuP</i>   | 14.8 | 15.0 | 14.9 | 14.4 | 14.4 | 14.8 | 14.4 | 14.6 |
| <i>mngA</i>   | 12.7 | 12.7 | 12.6 | 13.1 | 12.8 | 12.7 | 12.7 | 12.6 |
| <i>mngB</i>   | 13.5 | 13.5 | 13.2 | 13.2 | 13.7 | 13.8 | 13.6 | 13.6 |
| <i>mngR</i>   | 14.3 | 14.3 | 13.9 | 14.0 | 13.9 | 14.3 | 13.8 | 13.9 |
| <i>mnmA</i>   | 16.7 | 16.7 | 16.5 | 16.5 | 16.8 | 16.7 | 16.6 | 16.8 |
| <i>mnmC</i>   | 14.1 | 14.1 | 13.9 | 13.8 | 14.0 | 14.3 | 14.1 | 14.1 |
| <i>mnmE</i>   | 15.1 | 15.0 | 15.0 | 14.8 | 15.0 | 14.9 | 15.0 | 14.9 |
| <i>mnmG</i>   | 15.8 | 15.6 | 15.7 | 15.6 | 15.7 | 15.5 | 15.6 | 15.6 |
| <i>mntH</i>   | 14.0 | 15.3 | 14.9 | 13.7 | 13.6 | 14.7 | 14.3 | 13.5 |
| <i>mntR</i>   | 15.7 | 15.7 | 15.4 | 15.5 | 15.2 | 15.6 | 15.2 | 14.8 |
| <i>moaA</i>   | 16.0 | 17.4 | 17.2 | 15.9 | 15.6 | 15.6 | 15.8 | 15.9 |
| <i>moaB</i>   | 17.4 | 18.6 | 18.3 | 17.2 | 17.0 | 16.8 | 17.1 | 17.1 |
| <i>moaC</i>   | 16.6 | 17.8 | 17.5 | 16.5 | 16.1 | 15.7 | 16.2 | 16.3 |
| <i>moaD</i>   | 16.6 | 17.7 | 17.5 | 16.6 | 16.2 | 15.9 | 16.3 | 16.1 |
| <i>moaE</i>   | 16.0 | 17.3 | 17.1 | 16.1 | 15.7 | 15.3 | 15.7 | 15.7 |
| <i>mobA</i>   | 15.0 | 15.0 | 14.5 | 14.5 | 14.8 | 15.2 | 14.6 | 14.7 |
| <i>mobB</i>   | 14.6 | 14.8 | 14.1 | 14.5 | 14.2 | 14.7 | 14.2 | 14.4 |
| <i>mocA</i>   | 13.3 | 13.3 | 13.0 | 13.2 | 13.4 | 13.4 | 13.1 | 13.4 |
| <i>modA</i>   | 14.7 | 14.6 | 14.3 | 14.6 | 14.4 | 14.4 | 14.4 | 14.5 |
| <i>modB</i>   | 14.2 | 14.1 | 14.1 | 14.0 | 14.3 | 14.2 | 14.2 | 14.3 |
| <i>modC</i>   | 13.8 | 13.8 | 13.6 | 13.3 | 13.7 | 13.9 | 13.8 | 13.9 |
| <i>modE</i>   | 15.0 | 15.1 | 14.8 | 14.6 | 14.8 | 15.4 | 15.0 | 15.1 |
| <i>modF</i>   | 15.9 | 16.5 | 15.9 | 15.8 | 14.5 | 15.4 | 14.9 | 14.8 |
| <i>moeA</i>   | 15.3 | 15.3 | 15.3 | 15.4 | 15.3 | 15.4 | 15.4 | 15.4 |
| <i>moeB</i>   | 14.4 | 14.6 | 14.2 | 14.2 | 14.2 | 14.6 | 14.5 | 14.7 |
| <i>mog</i>    | 14.9 | 15.0 | 14.7 | 14.5 | 14.8 | 14.9 | 14.6 | 14.7 |
| <i>mokB</i>   | 14.9 | 14.8 | 14.8 | 14.7 | 15.3 | 15.3 | 15.0 | 15.3 |
| <i>mokC</i>   | 13.6 | 13.5 | 13.5 | 13.0 | 13.8 | 13.7 | 13.6 | 13.6 |
| <i>molR_1</i> | 13.3 | 13.3 | 13.0 | 13.3 | 13.2 | 13.6 | 13.0 | 13.1 |
| <i>molR_2</i> | 13.1 | 13.0 | 12.9 | 12.9 | 12.9 | 13.2 | 13.0 | 12.9 |
| <i>molR_3</i> | 12.7 | 12.8 | 12.6 | 13.2 | 12.7 | 12.7 | 12.7 | 12.7 |
| <i>motA</i>   | 12.8 | 12.9 | 12.8 | 12.9 | 12.8 | 13.2 | 12.9 | 12.7 |
| <i>motB</i>   | 12.9 | 13.2 | 12.8 | 13.1 | 13.0 | 13.2 | 12.9 | 12.8 |
| <i>mpaA</i>   | 14.5 | 14.7 | 14.4 | 14.0 | 14.9 | 15.1 | 14.9 | 15.0 |
| <i>mpl</i>    | 16.2 | 16.1 | 16.0 | 16.1 | 16.4 | 16.1 | 16.1 | 16.2 |
| <i>mppA</i>   | 14.8 | 14.6 | 14.4 | 14.5 | 14.6 | 14.7 | 14.4 | 14.5 |
| <i>mprA</i>   | 17.7 | 17.5 | 17.3 | 17.7 | 17.2 | 17.4 | 17.2 | 17.4 |
| <i>mqq</i>    | 15.5 | 16.8 | 16.0 | 15.2 | 13.0 | 13.1 | 13.1 | 13.0 |
| <i>mqsA</i>   | 14.9 | 14.9 | 14.3 | 14.8 | 14.5 | 15.0 | 14.3 | 14.8 |
| <i>mqsR</i>   | 16.3 | 16.4 | 15.6 | 15.8 | 16.1 | 16.8 | 15.5 | 16.0 |
| <i>mraY</i>   | 15.9 | 15.9 | 15.7 | 15.8 | 15.8 | 15.8 | 15.7 | 16.0 |
| <i>mraZ</i>   | 17.0 | 16.9 | 16.7 | 16.8 | 17.4 | 17.2 | 16.8 | 16.9 |
| <i>mrcA</i>   | 14.6 | 14.6 | 14.4 | 14.3 | 14.4 | 14.4 | 14.3 | 14.3 |
| <i>mrcB</i>   | 14.6 | 14.6 | 14.5 | 14.3 | 14.6 | 14.7 | 14.6 | 14.7 |
| <i>mrda</i>   | 14.8 | 14.7 | 14.6 | 14.5 | 14.4 | 14.7 | 14.3 | 14.5 |
| <i>mrdb</i>   | 15.7 | 15.7 | 15.5 | 15.3 | 15.5 | 15.7 | 15.3 | 15.6 |
| <i>mreB</i>   | 17.4 | 17.4 | 17.5 | 17.4 | 17.6 | 17.5 | 17.7 | 17.7 |
| <i>mreC</i>   | 15.3 | 15.3 | 15.2 | 15.2 | 15.2 | 15.2 | 15.2 | 15.4 |
| <i>mreD</i>   | 15.7 | 15.7 | 15.3 | 15.2 | 15.3 | 15.6 | 15.1 | 15.5 |
| <i>mrp</i>    | 16.7 | 15.6 | 16.6 | 16.7 | 16.8 | 15.6 | 16.8 | 16.8 |
| <i>mrr</i>    | 15.0 | 14.8 | 14.8 | 14.5 | 15.0 | 14.9 | 14.8 | 14.9 |
| <i>msbA</i>   | 15.7 | 15.8 | 15.4 | 15.7 | 15.7 | 16.1 | 15.7 | 15.8 |
| <i>mscL</i>   | 18.1 | 18.1 | 17.7 | 17.9 | 17.6 | 17.5 | 17.2 | 17.5 |
| <i>mscM</i>   | 15.0 | 14.9 | 14.4 | 14.8 | 14.9 | 15.3 | 14.7 | 15.1 |
| <i>mscS</i>   | 18.2 | 18.3 | 17.9 | 18.2 | 18.2 | 18.4 | 18.1 | 18.6 |

|             |      |      |      |      |      |      |      |      |
|-------------|------|------|------|------|------|------|------|------|
| <i>msrA</i> | 15.8 | 16.0 | 15.7 | 15.6 | 15.7 | 15.9 | 15.7 | 15.6 |
| <i>msrB</i> | 18.5 | 17.2 | 18.1 | 18.2 | 15.5 | 15.6 | 15.4 | 15.6 |
| <i>msyB</i> | 18.1 | 18.2 | 17.7 | 17.8 | 18.1 | 17.6 | 17.0 | 17.5 |
| <i>mtfA</i> | 16.0 | 16.1 | 15.6 | 15.8 | 15.7 | 16.5 | 15.5 | 15.7 |
| <i>mtgA</i> | 14.4 | 14.5 | 14.2 | 14.3 | 14.7 | 14.8 | 14.6 | 14.8 |
| <i>mtlA</i> | 15.0 | 14.8 | 15.1 | 15.4 | 14.8 | 14.7 | 15.0 | 15.0 |
| <i>mtlD</i> | 15.8 | 15.7 | 15.6 | 15.6 | 15.9 | 15.8 | 15.9 | 16.1 |
| <i>mtlR</i> | 15.1 | 15.2 | 14.8 | 15.1 | 15.1 | 15.1 | 14.9 | 15.3 |
| <i>mtn</i>  | 16.9 | 16.9 | 16.6 | 16.6 | 16.6 | 16.8 | 16.7 | 16.8 |
| <i>mtr</i>  | 13.8 | 13.7 | 13.7 | 13.3 | 14.0 | 14.3 | 14.2 | 14.4 |
| <i>mug</i>  | 15.6 | 15.8 | 15.6 | 15.0 | 15.7 | 15.5 | 15.6 | 15.3 |
| <i>mukB</i> | 15.6 | 15.6 | 15.4 | 15.5 | 15.4 | 15.6 | 15.4 | 15.5 |
| <i>mukE</i> | 16.1 | 16.0 | 15.8 | 15.8 | 15.9 | 16.2 | 15.8 | 15.6 |
| <i>mukF</i> | 15.5 | 15.5 | 15.3 | 15.2 | 15.5 | 15.6 | 15.4 | 15.4 |
| <i>murA</i> | 16.7 | 16.7 | 16.5 | 16.7 | 16.6 | 16.5 | 16.5 | 16.5 |
| <i>murB</i> | 15.9 | 15.8 | 15.2 | 15.8 | 15.6 | 15.9 | 15.3 | 15.7 |
| <i>murC</i> | 15.6 | 15.4 | 15.4 | 15.3 | 15.6 | 15.5 | 15.5 | 15.7 |
| <i>murD</i> | 15.5 | 15.5 | 15.3 | 15.5 | 15.6 | 15.5 | 15.4 | 15.6 |
| <i>murE</i> | 15.7 | 15.7 | 15.8 | 16.0 | 16.1 | 15.6 | 15.8 | 15.9 |
| <i>murF</i> | 15.5 | 15.5 | 15.6 | 15.5 | 15.5 | 15.5 | 15.7 | 15.7 |
| <i>murG</i> | 15.3 | 15.1 | 15.3 | 15.0 | 15.6 | 15.3 | 15.2 | 15.3 |
| <i>murI</i> | 15.6 | 15.6 | 15.3 | 15.4 | 15.5 | 15.8 | 15.6 | 15.5 |
| <i>murJ</i> | 14.3 | 14.2 | 14.2 | 13.7 | 14.1 | 14.2 | 14.2 | 14.2 |
| <i>murP</i> | 13.1 | 13.1 | 13.1 | 13.1 | 13.1 | 13.2 | 13.2 | 13.2 |
| <i>murQ</i> | 14.0 | 14.0 | 13.8 | 14.0 | 13.9 | 14.0 | 13.8 | 13.7 |
| <i>murR</i> | 13.5 | 13.5 | 13.2 | 13.4 | 13.4 | 13.6 | 13.3 | 13.3 |
| <i>mutH</i> | 13.9 | 13.9 | 13.7 | 13.5 | 13.9 | 14.1 | 13.8 | 13.9 |
| <i>mutL</i> | 14.8 | 14.7 | 14.5 | 14.4 | 14.4 | 14.8 | 14.6 | 14.6 |
| <i>mutM</i> | 14.1 | 14.0 | 14.0 | 13.9 | 13.8 | 13.9 | 13.8 | 13.8 |
| <i>mutS</i> | 14.5 | 14.7 | 14.5 | 14.4 | 14.5 | 14.7 | 14.5 | 14.3 |
| <i>mutT</i> | 14.3 | 14.2 | 14.1 | 13.8 | 13.9 | 14.2 | 13.9 | 13.8 |
| <i>mutY</i> | 15.3 | 15.2 | 14.9 | 14.9 | 14.8 | 14.9 | 14.6 | 14.8 |
| <i>mzrA</i> | 14.5 | 14.3 | 14.4 | 13.9 | 14.5 | 14.8 | 14.3 | 14.5 |
| <i>nac</i>  | 14.0 | 13.7 | 13.6 | 13.5 | 13.2 | 13.8 | 13.2 | 13.2 |
| <i>nadA</i> | 17.4 | 17.6 | 17.1 | 17.4 | 17.9 | 18.1 | 17.8 | 17.8 |
| <i>nadB</i> | 15.5 | 15.8 | 15.5 | 15.4 | 16.1 | 16.3 | 16.3 | 16.3 |
| <i>nadC</i> | 15.4 | 15.4 | 15.3 | 15.0 | 15.4 | 15.7 | 15.4 | 15.5 |
| <i>nadD</i> | 15.5 | 15.5 | 15.1 | 15.2 | 15.4 | 15.7 | 15.3 | 15.5 |
| <i>nadE</i> | 17.4 | 17.5 | 17.0 | 17.3 | 17.6 | 17.6 | 17.4 | 17.3 |
| <i>nadK</i> | 15.3 | 15.4 | 15.0 | 15.8 | 15.3 | 15.7 | 15.3 | 15.4 |
| <i>nadR</i> | 15.2 | 15.2 | 14.9 | 15.0 | 15.2 | 15.2 | 15.0 | 15.2 |
| <i>nagA</i> | 15.4 | 15.3 | 15.1 | 15.0 | 15.2 | 15.7 | 15.3 | 15.4 |
| <i>nagB</i> | 15.6 | 15.5 | 15.2 | 15.2 | 14.9 | 15.2 | 14.9 | 15.2 |
| <i>nagC</i> | 15.7 | 15.7 | 15.3 | 15.5 | 15.5 | 16.0 | 15.6 | 15.8 |
| <i>nagD</i> | 16.1 | 16.1 | 15.8 | 15.8 | 16.0 | 16.4 | 16.2 | 16.4 |
| <i>nagE</i> | 14.8 | 14.5 | 14.8 | 14.7 | 14.1 | 14.2 | 14.4 | 14.2 |
| <i>nagK</i> | 15.3 | 15.3 | 15.2 | 14.9 | 15.7 | 15.6 | 15.5 | 15.6 |
| <i>nagZ</i> | 16.3 | 15.7 | 15.9 | 16.2 | 16.7 | 16.2 | 16.3 | 16.3 |
| <i>nanA</i> | 13.4 | 13.2 | 13.3 | 13.1 | 13.0 | 12.9 | 13.0 | 12.8 |
| <i>nanC</i> | 13.4 | 13.2 | 13.0 | 13.6 | 13.2 | 13.4 | 12.9 | 13.1 |
| <i>nanE</i> | 13.2 | 13.2 | 13.1 | 13.5 | 13.1 | 13.0 | 13.2 | 13.0 |
| <i>nanK</i> | 13.4 | 13.4 | 13.5 | 13.5 | 13.6 | 13.3 | 13.5 | 13.2 |
| <i>nanM</i> | 14.3 | 14.3 | 13.8 | 14.0 | 14.1 | 14.2 | 13.7 | 13.7 |
| <i>nanR</i> | 15.2 | 15.3 | 14.8 | 14.8 | 15.0 | 15.5 | 15.1 | 15.2 |
| <i>nanS</i> | 13.2 | 13.2 | 13.1 | 13.2 | 13.0 | 13.3 | 13.0 | 12.9 |
| <i>nanT</i> | 13.0 | 12.9 | 13.0 | 13.1 | 13.0 | 12.9 | 13.0 | 12.9 |
| <i>napA</i> | 13.4 | 12.9 | 13.4 | 13.1 | 13.9 | 13.3 | 14.1 | 13.9 |
| <i>napB</i> | 13.4 | 13.1 | 13.5 | 13.1 | 13.8 | 13.3 | 14.0 | 13.8 |
| <i>napC</i> | 14.1 | 13.9 | 13.9 | 13.9 | 14.8 | 14.6 | 14.5 | 14.7 |
| <i>napD</i> | 13.4 | 13.2 | 13.5 | 13.8 | 14.2 | 13.4 | 14.1 | 13.8 |
| <i>napF</i> | 13.4 | 13.1 | 13.3 | 13.1 | 14.0 | 13.7 | 14.2 | 14.2 |

|             |      |      |      |      |      |      |      |      |
|-------------|------|------|------|------|------|------|------|------|
| <i>napG</i> | 13.0 | 12.8 | 13.1 | 13.2 | 13.3 | 12.9 | 13.7 | 13.4 |
| <i>napH</i> | 13.3 | 13.0 | 13.3 | 13.2 | 13.7 | 13.2 | 13.8 | 13.5 |
| <i>narG</i> | 13.0 | 12.8 | 12.9 | 13.1 | 16.8 | 14.2 | 16.9 | 17.1 |
| <i>narH</i> | 13.2 | 13.1 | 13.1 | 13.2 | 16.6 | 14.7 | 16.7 | 17.2 |
| <i>narI</i> | 12.9 | 13.0 | 13.0 | 13.2 | 15.5 | 13.9 | 15.6 | 16.2 |
| <i>narJ</i> | 13.0 | 13.0 | 12.9 | 12.8 | 15.8 | 14.2 | 15.9 | 16.8 |
| <i>narK</i> | 12.7 | 12.7 | 12.7 | 12.9 | 15.0 | 14.4 | 15.0 | 15.5 |
| <i>narL</i> | 16.2 | 16.2 | 15.9 | 16.2 | 15.8 | 15.7 | 15.7 | 15.9 |
| <i>narP</i> | 15.5 | 15.0 | 15.3 | 15.2 | 16.2 | 16.2 | 16.1 | 16.2 |
| <i>narQ</i> | 13.5 | 13.5 | 13.4 | 13.3 | 14.1 | 14.5 | 14.1 | 14.2 |
| <i>narU</i> | 13.1 | 12.8 | 12.9 | 12.9 | 13.1 | 12.6 | 12.8 | 12.9 |
| <i>narV</i> | 13.0 | 12.8 | 12.9 | 12.8 | 13.1 | 12.8 | 13.0 | 13.1 |
| <i>narW</i> | 13.1 | 13.1 | 13.1 | 13.3 | 13.3 | 13.0 | 13.3 | 13.0 |
| <i>narX</i> | 14.6 | 14.6 | 14.2 | 14.2 | 14.3 | 14.4 | 14.1 | 14.3 |
| <i>narY</i> | 13.3 | 13.0 | 13.2 | 13.6 | 13.7 | 13.1 | 13.4 | 13.3 |
| <i>narZ</i> | 13.2 | 12.8 | 13.1 | 13.3 | 13.3 | 12.8 | 13.2 | 13.1 |
| <i>ndh</i>  | 16.4 | 16.7 | 16.2 | 16.5 | 14.4 | 14.7 | 14.3 | 14.3 |
| <i>ndk</i>  | 18.6 | 18.1 | 18.4 | 18.4 | 14.5 | 15.0 | 14.7 | 15.1 |
| <i>nei</i>  | 14.5 | 14.5 | 14.2 | 14.3 | 14.3 | 14.4 | 14.3 | 14.5 |
| <i>nemA</i> | 14.5 | 14.6 | 14.4 | 14.1 | 14.2 | 14.3 | 14.2 | 14.3 |
| <i>nemR</i> | 13.9 | 13.8 | 13.8 | 13.3 | 13.4 | 13.8 | 13.5 | 13.5 |
| <i>nepI</i> | 13.6 | 13.6 | 13.5 | 13.7 | 13.1 | 13.1 | 13.1 | 13.0 |
| <i>nfi</i>  | 15.2 | 15.1 | 15.0 | 14.9 | 15.1 | 15.0 | 15.1 | 15.1 |
| <i>nfo</i>  | 15.6 | 15.9 | 15.5 | 15.3 | 15.1 | 15.8 | 15.4 | 15.5 |
| <i>nfrA</i> | 13.6 | 13.5 | 13.4 | 13.4 | 13.4 | 13.7 | 13.5 | 13.5 |
| <i>nfrB</i> | 13.0 | 13.0 | 12.9 | 13.1 | 13.1 | 13.2 | 13.0 | 13.1 |
| <i>nfsA</i> | 16.5 | 16.8 | 16.3 | 16.3 | 16.0 | 16.1 | 15.7 | 15.9 |
| <i>nfsB</i> | 17.4 | 17.2 | 16.9 | 17.2 | 17.0 | 17.3 | 16.7 | 17.1 |
| <i>nfuA</i> | 17.8 | 18.1 | 17.9 | 17.5 | 16.9 | 17.4 | 16.9 | 17.1 |
| <i>nhaA</i> | 14.8 | 14.9 | 14.7 | 14.5 | 15.4 | 15.1 | 15.3 | 15.7 |
| <i>nhaB</i> | 15.6 | 15.8 | 15.7 | 15.4 | 15.2 | 15.7 | 15.4 | 15.4 |
| <i>nhaR</i> | 14.6 | 14.5 | 14.1 | 14.0 | 14.7 | 14.8 | 14.5 | 15.1 |
| <i>nhoA</i> | 14.3 | 14.7 | 14.1 | 14.3 | 14.3 | 14.5 | 14.1 | 14.1 |
| <i>nikA</i> | 13.0 | 12.9 | 12.9 | 13.1 | 16.8 | 16.8 | 17.1 | 16.9 |
| <i>nikB</i> | 12.9 | 12.8 | 12.8 | 12.9 | 15.3 | 15.5 | 15.8 | 15.9 |
| <i>nikC</i> | 12.7 | 12.7 | 12.8 | 12.8 | 15.4 | 14.8 | 15.6 | 15.3 |
| <i>nikD</i> | 13.1 | 13.1 | 13.1 | 13.0 | 16.0 | 15.8 | 16.3 | 16.4 |
| <i>nikE</i> | 13.4 | 13.4 | 13.2 | 13.4 | 15.1 | 15.4 | 15.6 | 15.5 |
| <i>nikR</i> | 14.9 | 15.0 | 14.7 | 14.2 | 15.0 | 15.8 | 15.3 | 15.4 |
| <i>ninE</i> | 13.1 | 13.2 | 12.9 | 13.7 | 13.2 | 13.1 | 13.1 | 12.8 |
| <i>nirB</i> | 13.0 | 12.8 | 12.9 | 13.1 | 15.7 | 15.0 | 16.7 | 16.3 |
| <i>nirC</i> | 13.4 | 13.2 | 13.4 | 13.0 | 14.3 | 14.1 | 15.3 | 14.6 |
| <i>nirD</i> | 12.9 | 12.8 | 12.9 | 12.9 | 14.8 | 14.1 | 15.6 | 15.4 |
| <i>nlpA</i> | 17.4 | 17.6 | 16.9 | 17.2 | 17.4 | 17.9 | 17.1 | 17.2 |
| <i>nlpC</i> | 16.0 | 16.0 | 15.8 | 15.7 | 16.1 | 16.4 | 15.9 | 16.2 |
| <i>nlpD</i> | 18.5 | 18.6 | 18.6 | 18.7 | 18.6 | 18.3 | 18.3 | 18.2 |
| <i>nlpE</i> | 15.2 | 15.1 | 14.8 | 14.7 | 15.1 | 15.2 | 15.0 | 15.0 |
| <i>nlpI</i> | 17.8 | 17.9 | 17.1 | 17.8 | 18.1 | 18.2 | 17.9 | 18.2 |
| <i>nmpC</i> | 19.1 | 18.3 | 18.9 | 19.1 | 18.9 | 19.1 | 19.0 | 18.7 |
| <i>nohA</i> | 13.1 | 13.1 | 12.9 | 13.4 | 13.2 | 13.1 | 13.0 | 13.0 |
| <i>nohB</i> | 13.1 | 13.1 | 12.9 | 13.5 | 13.3 | 13.2 | 13.1 | 12.9 |
| <i>norR</i> | 13.8 | 13.8 | 13.6 | 13.6 | 13.8 | 13.7 | 13.7 | 13.5 |
| <i>norV</i> | 13.1 | 13.0 | 12.9 | 13.1 | 13.0 | 13.1 | 13.0 | 13.0 |
| <i>norW</i> | 13.0 | 12.9 | 12.8 | 13.2 | 12.9 | 13.0 | 12.9 | 12.8 |
| <i>npr</i>  | 15.5 | 15.5 | 15.0 | 15.2 | 15.6 | 15.9 | 15.3 | 15.7 |
| <i>nrdA</i> | 16.5 | 16.3 | 16.3 | 16.5 | 14.8 | 15.3 | 15.4 | 14.9 |
| <i>nrdB</i> | 16.5 | 16.4 | 16.3 | 16.5 | 15.3 | 15.9 | 15.8 | 15.7 |
| <i>nrdD</i> | 13.8 | 13.8 | 13.7 | 13.5 | 15.2 | 15.6 | 16.0 | 15.4 |
| <i>nrdE</i> | 13.9 | 17.5 | 17.0 | 14.0 | 12.7 | 16.2 | 16.3 | 12.7 |
| <i>nrdF</i> | 13.7 | 17.0 | 16.6 | 13.4 | 12.7 | 15.7 | 15.6 | 12.6 |
| <i>nrdG</i> | 13.3 | 13.4 | 13.2 | 13.4 | 14.0 | 14.6 | 14.7 | 14.3 |

|             |      |      |      |      |      |      |      |      |
|-------------|------|------|------|------|------|------|------|------|
| <i>nrdH</i> | 15.2 | 19.2 | 19.1 | 14.6 | 13.1 | 18.0 | 18.4 | 13.1 |
| <i>nrdI</i> | 14.2 | 18.0 | 17.7 | 13.7 | 12.8 | 16.8 | 17.1 | 12.7 |
| <i>nrdR</i> | 16.4 | 16.3 | 16.0 | 16.1 | 16.3 | 16.4 | 16.2 | 16.2 |
| <i>nrfA</i> | 13.1 | 13.0 | 12.9 | 13.3 | 16.4 | 13.4 | 17.1 | 16.8 |
| <i>nrfB</i> | 12.8 | 12.8 | 12.8 | 12.9 | 15.4 | 12.8 | 16.4 | 16.1 |
| <i>nrfC</i> | 12.8 | 12.9 | 12.8 | 13.5 | 15.1 | 12.9 | 15.9 | 15.9 |
| <i>nrfD</i> | 12.8 | 12.8 | 12.8 | 13.6 | 15.0 | 12.8 | 15.6 | 15.5 |
| <i>nrfE</i> | 12.7 | 12.8 | 12.7 | 13.0 | 13.3 | 12.8 | 13.5 | 13.4 |
| <i>nrfF</i> | 13.0 | 13.0 | 12.9 | 13.1 | 13.7 | 13.0 | 13.7 | 13.5 |
| <i>nrfG</i> | 12.9 | 13.0 | 12.8 | 13.2 | 13.2 | 12.9 | 13.4 | 13.4 |
| <i>nsrR</i> | 16.2 | 16.0 | 15.9 | 15.8 | 16.1 | 16.4 | 15.8 | 16.0 |
| <i>nth</i>  | 15.1 | 15.0 | 14.6 | 14.6 | 14.1 | 14.3 | 14.0 | 14.5 |
| <i>nudB</i> | 17.1 | 16.9 | 16.8 | 17.3 | 17.5 | 17.4 | 17.3 | 17.3 |
| <i>nudC</i> | 16.0 | 15.9 | 15.7 | 15.8 | 15.8 | 15.7 | 15.6 | 15.7 |
| <i>nudE</i> | 16.2 | 16.3 | 15.8 | 16.1 | 14.9 | 15.2 | 14.6 | 14.9 |
| <i>nudF</i> | 15.8 | 15.7 | 15.2 | 15.3 | 15.9 | 16.0 | 15.4 | 15.6 |
| <i>nudG</i> | 14.0 | 13.9 | 13.8 | 13.8 | 13.7 | 14.1 | 13.8 | 13.7 |
| <i>nudI</i> | 14.0 | 14.4 | 14.1 | 13.5 | 13.6 | 14.0 | 13.6 | 13.7 |
| <i>nudJ</i> | 15.5 | 15.4 | 14.9 | 15.2 | 15.1 | 15.6 | 15.0 | 15.4 |
| <i>nudK</i> | 15.1 | 15.2 | 14.6 | 15.1 | 14.9 | 15.1 | 14.6 | 14.8 |
| <i>nudL</i> | 14.9 | 14.9 | 14.7 | 14.3 | 15.0 | 15.3 | 15.1 | 15.3 |
| <i>nuoA</i> | 17.8 | 16.5 | 17.6 | 17.8 | 17.3 | 16.1 | 17.3 | 17.3 |
| <i>nuoB</i> | 17.8 | 16.3 | 17.7 | 17.9 | 17.3 | 15.9 | 17.2 | 17.0 |
| <i>nuoC</i> | 17.5 | 15.8 | 17.7 | 17.6 | 16.7 | 15.2 | 17.0 | 16.7 |
| <i>nuoE</i> | 18.4 | 16.9 | 18.3 | 18.5 | 17.7 | 16.4 | 17.7 | 17.4 |
| <i>nuoF</i> | 17.3 | 15.8 | 17.4 | 17.4 | 16.5 | 15.2 | 16.5 | 16.3 |
| <i>nuoG</i> | 17.2 | 15.5 | 17.4 | 17.3 | 16.3 | 14.8 | 16.5 | 16.5 |
| <i>nuoH</i> | 17.3 | 15.2 | 17.4 | 17.4 | 16.4 | 14.6 | 16.3 | 16.4 |
| <i>nuoI</i> | 17.1 | 15.2 | 17.1 | 17.2 | 16.2 | 14.4 | 16.1 | 16.0 |
| <i>nuoJ</i> | 17.1 | 15.5 | 17.4 | 17.4 | 16.7 | 14.8 | 16.5 | 16.4 |
| <i>nuoK</i> | 17.6 | 15.7 | 17.4 | 18.0 | 16.5 | 15.0 | 16.6 | 16.6 |
| <i>nuoL</i> | 16.9 | 15.2 | 17.2 | 17.1 | 16.1 | 14.5 | 16.2 | 16.1 |
| <i>nuoM</i> | 17.0 | 15.5 | 17.2 | 17.0 | 16.2 | 15.0 | 16.4 | 16.4 |
| <i>nuoN</i> | 16.4 | 15.0 | 16.7 | 16.5 | 15.7 | 14.6 | 15.8 | 15.8 |
| <i>nupC</i> | 16.4 | 16.0 | 16.3 | 16.3 | 16.1 | 16.2 | 16.3 | 16.4 |
| <i>nupG</i> | 14.0 | 13.8 | 13.7 | 13.7 | 13.6 | 14.0 | 13.8 | 14.0 |
| <i>nupX</i> | 12.9 | 12.8 | 12.7 | 13.0 | 12.8 | 12.9 | 12.8 | 12.7 |
| <i>nusA</i> | 17.7 | 17.5 | 17.4 | 17.9 | 17.8 | 17.7 | 17.7 | 17.7 |
| <i>nusB</i> | 17.2 | 17.1 | 17.1 | 17.1 | 17.0 | 16.9 | 17.1 | 17.2 |
| <i>nusG</i> | 18.2 | 18.1 | 17.9 | 18.1 | 17.9 | 18.1 | 18.0 | 18.1 |
| <i>obgE</i> | 15.9 | 15.8 | 15.8 | 15.9 | 16.1 | 16.0 | 16.0 | 15.9 |
| <i>ogrK</i> | 14.9 | 15.0 | 14.6 | 14.2 | 14.5 | 15.0 | 14.3 | 14.5 |
| <i>ogt</i>  | 14.6 | 14.6 | 14.3 | 14.0 | 14.5 | 14.9 | 14.5 | 14.7 |
| <i>ohsC</i> | 13.6 | 13.5 | 13.4 | 13.9 | 13.4 | 13.6 | 13.4 | 13.6 |
| <i>ompA</i> | 19.5 | 19.5 | 19.9 | 19.6 | 19.8 | 19.5 | 19.9 | 19.5 |
| <i>ompC</i> | 19.6 | 19.4 | 20.0 | 19.6 | 20.0 | 19.7 | 20.3 | 20.0 |
| <i>ompF</i> | 20.2 | 20.0 | 20.2 | 20.2 | 20.2 | 20.1 | 20.3 | 20.1 |
| <i>ompG</i> | 12.7 | 12.7 | 12.6 | 13.0 | 12.8 | 12.7 | 12.7 | 12.6 |
| <i>ompL</i> | 12.8 | 12.8 | 12.6 | 13.1 | 12.8 | 12.7 | 12.5 | 12.6 |
| <i>ompN</i> | 13.0 | 12.9 | 13.2 | 13.2 | 13.2 | 12.8 | 12.9 | 12.6 |
| <i>ompR</i> | 15.7 | 15.7 | 15.6 | 15.7 | 15.6 | 15.7 | 15.7 | 15.7 |
| <i>ompT</i> | 20.0 | 20.0 | 20.1 | 20.0 | 20.2 | 19.8 | 20.1 | 19.8 |
| <i>ompW</i> | 14.4 | 13.8 | 14.6 | 14.1 | 14.5 | 15.6 | 14.3 | 13.9 |
| <i>ompX</i> | 18.5 | 18.5 | 18.5 | 18.3 | 18.7 | 18.8 | 18.9 | 18.9 |
| <i>omrA</i> | 13.6 | 13.5 | 13.3 | 12.9 | 13.3 | 13.7 | 13.1 | 13.2 |
| <i>omrB</i> | 14.3 | 14.5 | 13.9 | 14.3 | 13.9 | 14.4 | 13.7 | 13.9 |
| <i>oppA</i> | 18.8 | 18.2 | 18.1 | 18.9 | 20.1 | 19.8 | 20.1 | 20.0 |
| <i>oppB</i> | 16.9 | 15.6 | 16.3 | 17.1 | 19.1 | 18.2 | 19.1 | 19.1 |
| <i>oppC</i> | 16.4 | 15.2 | 15.9 | 16.5 | 18.7 | 17.6 | 18.7 | 18.8 |
| <i>oppD</i> | 16.5 | 15.4 | 15.8 | 16.6 | 18.6 | 17.7 | 18.5 | 18.8 |
| <i>oppF</i> | 15.8 | 14.8 | 15.3 | 15.7 | 18.0 | 17.0 | 18.1 | 18.2 |



|             |      |      |      |      |      |      |      |      |
|-------------|------|------|------|------|------|------|------|------|
| <i>orn</i>  | 15.8 | 15.8 | 15.7 | 15.5 | 15.8 | 15.8 | 15.6 | 15.8 |
| <i>osmB</i> | 16.8 | 16.4 | 16.3 | 16.3 | 16.9 | 16.6 | 16.2 | 16.9 |
| <i>osmC</i> | 17.2 | 17.5 | 17.1 | 17.0 | 17.0 | 16.9 | 16.3 | 16.8 |
| <i>osmE</i> | 17.5 | 17.3 | 17.1 | 17.0 | 17.6 | 16.9 | 16.3 | 17.2 |
| <i>osmF</i> | 14.6 | 14.4 | 14.3 | 14.1 | 14.1 | 14.1 | 13.9 | 14.1 |
| <i>osmY</i> | 18.0 | 17.7 | 17.5 | 18.1 | 15.2 | 15.0 | 14.6 | 15.3 |
| <i>otsA</i> | 16.1 | 15.8 | 15.6 | 16.2 | 15.7 | 15.5 | 15.3 | 15.8 |
| <i>otsB</i> | 16.0 | 16.0 | 15.3 | 16.0 | 15.9 | 15.8 | 15.1 | 15.5 |
| <i>oxc</i>  | 12.9 | 12.9 | 12.8 | 12.9 | 12.8 | 13.0 | 12.8 | 12.6 |
| <i>oxyR</i> | 16.0 | 15.9 | 15.9 | 15.8 | 15.9 | 15.7 | 15.9 | 16.0 |
| <i>oxyS</i> | 14.7 | 15.6 | 14.3 | 13.5 | 13.1 | 13.6 | 12.9 | 12.9 |
| <i>paaA</i> | 12.7 | 12.9 | 12.6 | 13.0 | 12.7 | 12.6 | 12.6 | 12.8 |
| <i>paaB</i> | 13.3 | 13.5 | 13.1 | 14.1 | 13.4 | 13.1 | 13.1 | 12.8 |
| <i>paaC</i> | 12.9 | 13.0 | 12.8 | 13.2 | 12.9 | 12.9 | 12.8 | 12.7 |
| <i>paaD</i> | 12.9 | 13.1 | 12.8 | 13.2 | 13.0 | 12.9 | 12.9 | 12.7 |
| <i>paaE</i> | 12.9 | 13.0 | 12.8 | 12.9 | 12.9 | 12.8 | 12.9 | 13.2 |
| <i>paaF</i> | 12.9 | 12.9 | 12.8 | 13.3 | 12.9 | 12.9 | 12.8 | 12.7 |
| <i>paaG</i> | 12.9 | 12.9 | 12.9 | 13.1 | 13.0 | 12.8 | 12.9 | 12.8 |
| <i>paaH</i> | 12.9 | 12.9 | 12.8 | 13.3 | 13.0 | 12.8 | 12.9 | 12.8 |
| <i>paaI</i> | 12.8 | 13.0 | 12.8 | 12.8 | 12.9 | 12.9 | 12.8 | 12.9 |
| <i>paaJ</i> | 13.4 | 13.3 | 13.2 | 13.3 | 13.0 | 12.9 | 13.0 | 12.9 |
| <i>paaK</i> | 13.3 | 13.2 | 13.2 | 13.2 | 13.0 | 12.9 | 12.9 | 12.8 |
| <i>paaX</i> | 14.8 | 14.2 | 14.4 | 14.3 | 14.4 | 14.2 | 14.2 | 14.5 |
| <i>paaY</i> | 14.8 | 14.3 | 14.4 | 14.4 | 14.5 | 14.3 | 14.2 | 14.4 |
| <i>paaZ</i> | 12.8 | 12.8 | 12.7 | 13.1 | 12.9 | 12.7 | 12.8 | 12.6 |
| <i>pabA</i> | 14.5 | 14.5 | 14.3 | 14.2 | 14.2 | 14.4 | 14.2 | 14.2 |
| <i>pabB</i> | 15.0 | 15.0 | 14.6 | 14.6 | 14.6 | 14.9 | 14.6 | 14.8 |
| <i>pabC</i> | 14.9 | 14.9 | 14.4 | 14.5 | 14.8 | 15.0 | 14.6 | 14.8 |
| <i>pagB</i> | 15.9 | 16.1 | 15.6 | 15.7 | 15.6 | 16.0 | 15.4 | 15.6 |
| <i>pagP</i> | 13.1 | 13.1 | 12.9 | 13.0 | 13.8 | 13.5 | 13.6 | 13.8 |
| <i>pal</i>  | 19.2 | 19.2 | 18.9 | 19.3 | 18.9 | 19.2 | 18.9 | 19.0 |
| <i>panB</i> | 17.2 | 17.4 | 17.4 | 17.3 | 17.7 | 17.7 | 17.8 | 17.6 |
| <i>panC</i> | 16.9 | 16.9 | 16.8 | 16.8 | 17.0 | 17.1 | 17.2 | 17.4 |
| <i>panD</i> | 18.2 | 18.2 | 18.0 | 17.8 | 17.9 | 18.0 | 17.7 | 18.1 |
| <i>panE</i> | 15.4 | 15.4 | 15.2 | 15.2 | 15.2 | 15.6 | 15.3 | 15.2 |
| <i>panF</i> | 14.1 | 14.0 | 14.0 | 14.0 | 13.8 | 13.9 | 13.9 | 13.9 |
| <i>parC</i> | 15.9 | 15.8 | 15.6 | 15.8 | 15.5 | 15.7 | 15.4 | 15.7 |
| <i>parE</i> | 15.2 | 15.4 | 15.0 | 15.2 | 15.2 | 15.5 | 15.2 | 15.3 |
| <i>pbl</i>  | 12.7 | 12.8 | 12.5 | 13.0 | 12.8 | 12.6 | 12.5 | 12.6 |
| <i>pbpC</i> | 13.4 | 13.3 | 13.2 | 13.4 | 13.4 | 13.4 | 13.4 | 13.2 |
| <i>pbpG</i> | 15.5 | 15.5 | 15.0 | 15.0 | 15.2 | 15.8 | 15.4 | 15.6 |
| <i>pck</i>  | 15.8 | 15.5 | 16.2 | 15.8 | 15.6 | 15.7 | 16.0 | 15.5 |
| <i>pcm</i>  | 16.3 | 16.2 | 15.9 | 16.0 | 16.1 | 16.3 | 15.9 | 16.1 |
| <i>pcnB</i> | 16.8 | 16.8 | 16.8 | 16.7 | 17.0 | 16.9 | 17.1 | 16.9 |
| <i>pdhR</i> | 15.9 | 15.9 | 15.9 | 15.3 | 14.7 | 15.6 | 15.0 | 14.7 |
| <i>pdxA</i> | 16.1 | 16.1 | 15.8 | 15.9 | 16.1 | 16.2 | 15.9 | 16.0 |
| <i>pdxB</i> | 16.4 | 16.4 | 16.2 | 16.5 | 16.4 | 16.4 | 16.3 | 16.5 |
| <i>pdxH</i> | 17.0 | 17.0 | 16.5 | 16.9 | 16.8 | 17.1 | 16.9 | 17.3 |
| <i>pdxJ</i> | 16.3 | 16.3 | 16.0 | 16.2 | 16.6 | 16.5 | 16.4 | 16.3 |
| <i>pdxK</i> | 15.7 | 15.8 | 15.5 | 15.6 | 16.0 | 16.0 | 15.8 | 15.9 |
| <i>pdxY</i> | 15.5 | 15.3 | 15.2 | 15.1 | 15.2 | 15.4 | 15.5 | 15.7 |
| <i>pepA</i> | 16.7 | 16.6 | 16.5 | 16.8 | 16.6 | 16.7 | 16.5 | 16.7 |
| <i>pepB</i> | 16.1 | 15.3 | 16.1 | 16.1 | 15.3 | 14.5 | 15.5 | 15.3 |
| <i>pepD</i> | 17.1 | 17.2 | 16.9 | 17.1 | 17.3 | 17.3 | 17.2 | 17.3 |
| <i>pepE</i> | 13.9 | 13.7 | 14.0 | 13.5 | 16.1 | 16.1 | 16.5 | 16.6 |
| <i>pepN</i> | 16.6 | 16.5 | 16.5 | 16.5 | 16.4 | 16.5 | 16.4 | 16.5 |
| <i>pepP</i> | 16.7 | 16.8 | 16.5 | 16.9 | 16.7 | 16.9 | 16.9 | 16.9 |
| <i>pepQ</i> | 16.8 | 16.7 | 16.8 | 16.8 | 16.3 | 16.5 | 16.5 | 16.3 |
| <i>pepT</i> | 15.1 | 15.1 | 14.8 | 15.0 | 16.7 | 16.5 | 16.5 | 16.7 |
| <i>perR</i> | 13.3 | 13.3 | 13.1 | 13.2 | 13.1 | 13.4 | 13.0 | 13.1 |
| <i>pfkA</i> | 17.0 | 17.2 | 16.8 | 17.2 | 18.6 | 18.4 | 18.8 | 18.6 |

|             |      |      |      |      |      |      |      |      |
|-------------|------|------|------|------|------|------|------|------|
| <i>pfkB</i> | 16.8 | 16.8 | 16.4 | 16.6 | 16.9 | 16.9 | 16.7 | 16.9 |
| <i>pfIA</i> | 15.6 | 14.5 | 15.4 | 15.3 | 16.5 | 15.6 | 16.6 | 16.6 |
| <i>pfIB</i> | 18.3 | 18.3 | 18.3 | 18.4 | 19.7 | 19.7 | 20.1 | 19.8 |
| <i>pfIC</i> | 13.0 | 13.0 | 12.9 | 12.9 | 13.1 | 12.9 | 13.0 | 12.9 |
| <i>pfID</i> | 12.9 | 12.9 | 12.8 | 13.0 | 12.9 | 12.9 | 12.9 | 12.8 |
| <i>pgaA</i> | 13.0 | 13.0 | 12.9 | 12.9 | 13.1 | 13.3 | 13.1 | 13.0 |
| <i>pgaB</i> | 12.8 | 12.9 | 12.7 | 13.1 | 12.9 | 13.0 | 12.8 | 12.7 |
| <i>pgaC</i> | 12.9 | 13.0 | 12.8 | 13.3 | 12.9 | 13.0 | 12.9 | 12.8 |
| <i>pgaD</i> | 13.5 | 13.6 | 13.3 | 13.3 | 13.3 | 13.8 | 13.3 | 13.1 |
| <i>pgi</i>  | 17.9 | 17.9 | 17.8 | 17.9 | 18.3 | 18.3 | 18.4 | 18.4 |
| <i>pgk</i>  | 18.8 | 18.7 | 18.8 | 18.9 | 19.2 | 19.2 | 19.5 | 19.1 |
| <i>pgl</i>  | 16.3 | 16.4 | 16.4 | 16.2 | 16.6 | 16.3 | 16.4 | 16.4 |
| <i>pgm</i>  | 16.6 | 16.5 | 16.6 | 16.8 | 16.7 | 16.6 | 16.8 | 16.8 |
| <i>pgpA</i> | 15.1 | 15.1 | 14.9 | 15.0 | 15.4 | 15.3 | 15.2 | 15.6 |
| <i>pgpB</i> | 14.5 | 14.4 | 14.2 | 14.0 | 14.6 | 14.6 | 14.3 | 14.4 |
| <i>pgpC</i> | 14.8 | 14.8 | 14.4 | 14.1 | 14.6 | 15.2 | 14.8 | 15.2 |
| <i>pgsA</i> | 15.6 | 15.6 | 15.6 | 15.2 | 15.6 | 15.8 | 15.7 | 15.8 |
| <i>pheA</i> | 16.8 | 17.0 | 16.5 | 16.8 | 16.0 | 16.7 | 16.0 | 16.0 |
| <i>pheL</i> | 16.7 | 16.6 | 16.2 | 15.4 | 16.8 | 17.1 | 16.1 | 16.0 |
| <i>pheM</i> | 15.9 | 16.0 | 15.3 | 15.1 | 15.8 | 16.8 | 15.6 | 15.9 |
| <i>pheP</i> | 14.2 | 14.0 | 14.0 | 13.7 | 13.8 | 14.0 | 13.8 | 14.1 |
| <i>pheS</i> | 17.3 | 17.2 | 17.3 | 17.3 | 17.2 | 17.3 | 17.3 | 17.2 |
| <i>pheT</i> | 17.6 | 17.6 | 17.5 | 17.6 | 17.6 | 17.6 | 17.6 | 17.6 |
| <i>pheU</i> | 16.2 | 16.3 | 15.4 | 15.4 | 15.6 | 15.8 | 15.2 | 15.7 |
| <i>pheV</i> | 14.7 | 14.9 | 14.7 | 14.1 | 14.8 | 14.7 | 13.9 | 14.0 |
| <i>phnC</i> | 12.7 | 12.7 | 12.6 | 12.7 | 12.7 | 12.6 | 12.7 | 12.6 |
| <i>phnD</i> | 12.9 | 12.8 | 12.7 | 13.1 | 12.7 | 12.7 | 12.7 | 12.6 |
| <i>phnE</i> | 14.2 | 14.2 | 14.2 | 14.3 | 14.4 | 14.3 | 14.3 | 14.1 |
| <i>phnF</i> | 12.5 | 12.5 | 12.5 | 13.0 | 12.6 | 12.6 | 12.6 | 12.5 |
| <i>phnG</i> | 12.7 | 12.8 | 12.6 | 12.9 | 12.8 | 12.6 | 12.8 | 12.7 |
| <i>phnH</i> | 12.6 | 12.6 | 12.6 | 13.0 | 12.7 | 12.7 | 12.8 | 12.6 |
| <i>phnI</i> | 12.7 | 12.6 | 12.6 | 13.3 | 12.7 | 12.7 | 12.8 | 12.6 |
| <i>phnJ</i> | 12.8 | 12.8 | 12.6 | 12.9 | 12.8 | 12.7 | 12.8 | 12.6 |
| <i>phnK</i> | 12.8 | 12.7 | 12.8 | 13.6 | 12.9 | 12.8 | 12.9 | 12.6 |
| <i>phnL</i> | 12.6 | 12.6 | 12.6 | 12.8 | 12.9 | 12.6 | 12.8 | 12.5 |
| <i>phnM</i> | 12.8 | 12.8 | 12.7 | 13.0 | 13.3 | 12.7 | 12.9 | 12.6 |
| <i>phnN</i> | 13.1 | 13.0 | 13.1 | 13.2 | 13.1 | 13.0 | 13.1 | 12.8 |
| <i>phnO</i> | 13.9 | 13.9 | 13.7 | 13.1 | 13.6 | 13.7 | 13.7 | 13.9 |
| <i>phnP</i> | 13.4 | 13.4 | 13.4 | 13.9 | 13.5 | 13.3 | 13.4 | 13.3 |
| <i>phoA</i> | 14.3 | 14.2 | 14.2 | 14.2 | 13.7 | 14.0 | 13.9 | 13.8 |
| <i>phoB</i> | 14.5 | 14.4 | 14.3 | 14.2 | 14.4 | 14.4 | 14.2 | 14.3 |
| <i>phoE</i> | 13.2 | 12.8 | 12.9 | 13.0 | 12.9 | 12.8 | 12.7 | 12.7 |
| <i>phoH</i> | 15.8 | 16.1 | 15.6 | 15.6 | 12.8 | 13.1 | 13.5 | 12.9 |
| <i>phoP</i> | 17.4 | 17.4 | 17.0 | 17.4 | 17.4 | 17.8 | 17.2 | 17.2 |
| <i>phoQ</i> | 15.4 | 15.3 | 15.0 | 15.4 | 15.3 | 15.7 | 15.2 | 15.2 |
| <i>phoR</i> | 13.6 | 13.4 | 13.4 | 13.4 | 13.3 | 13.4 | 13.4 | 13.4 |
| <i>phoU</i> | 15.5 | 15.4 | 15.2 | 15.6 | 15.1 | 15.2 | 15.0 | 15.1 |
| <i>php</i>  | 12.8 | 12.8 | 12.6 | 12.9 | 12.8 | 12.8 | 12.7 | 13.3 |
| <i>phr</i>  | 14.1 | 14.2 | 13.7 | 14.2 | 14.1 | 14.0 | 13.7 | 13.8 |
| <i>pinE</i> | 13.0 | 13.0 | 12.8 | 13.1 | 13.2 | 12.9 | 13.0 | 12.8 |
| <i>pinH</i> | 13.3 | 13.2 | 13.0 | 13.3 | 13.4 | 13.1 | 13.1 | 13.0 |
| <i>pinQ</i> | 13.6 | 13.6 | 13.2 | 13.2 | 13.5 | 13.9 | 13.3 | 13.3 |
| <i>pinR</i> | 13.6 | 13.7 | 13.2 | 13.2 | 13.6 | 13.9 | 13.3 | 13.4 |
| <i>pitA</i> | 16.4 | 16.3 | 16.3 | 16.2 | 17.0 | 17.0 | 17.1 | 17.0 |
| <i>pitB</i> | 12.8 | 12.9 | 12.8 | 13.7 | 13.0 | 12.8 | 12.8 | 12.6 |
| <i>pldA</i> | 15.2 | 15.3 | 15.3 | 14.9 | 15.2 | 15.3 | 15.2 | 15.1 |
| <i>pldB</i> | 15.5 | 15.4 | 15.1 | 14.8 | 15.4 | 15.7 | 15.2 | 15.4 |
| <i>pliG</i> | 16.4 | 16.2 | 15.7 | 15.5 | 15.2 | 16.2 | 14.9 | 15.1 |
| <i>plsB</i> | 15.7 | 15.7 | 15.6 | 15.4 | 15.6 | 15.4 | 15.5 | 15.6 |
| <i>plsC</i> | 16.1 | 15.9 | 15.5 | 15.8 | 15.4 | 15.9 | 15.4 | 15.6 |
| <i>plsX</i> | 16.5 | 16.4 | 16.4 | 16.4 | 16.7 | 16.6 | 16.5 | 16.4 |

|             |      |      |      |      |      |      |      |      |
|-------------|------|------|------|------|------|------|------|------|
| <i>pmbA</i> | 15.8 | 15.8 | 15.7 | 15.8 | 15.8 | 15.8 | 15.7 | 15.7 |
| <i>pmrD</i> | 15.2 | 15.2 | 14.5 | 14.7 | 15.1 | 15.8 | 14.8 | 15.1 |
| <i>pncA</i> | 15.2 | 15.1 | 15.0 | 14.8 | 15.1 | 14.9 | 14.9 | 15.0 |
| <i>pncB</i> | 17.0 | 17.2 | 17.0 | 17.1 | 17.2 | 17.5 | 17.4 | 17.4 |
| <i>pnp</i>  | 17.7 | 17.5 | 17.6 | 17.7 | 17.7 | 17.5 | 17.7 | 17.6 |
| <i>pntA</i> | 19.3 | 19.1 | 19.2 | 19.3 | 19.1 | 18.9 | 18.9 | 18.8 |
| <i>pntB</i> | 18.5 | 18.4 | 18.6 | 18.7 | 18.5 | 18.1 | 18.5 | 18.4 |
| <i>pnuC</i> | 17.0 | 17.2 | 16.7 | 17.2 | 17.4 | 17.6 | 17.5 | 17.6 |
| <i>polA</i> | 15.9 | 15.8 | 15.6 | 15.9 | 15.6 | 15.9 | 15.6 | 15.6 |
| <i>polB</i> | 13.7 | 13.7 | 13.6 | 13.5 | 13.5 | 13.7 | 13.5 | 13.5 |
| <i>potA</i> | 16.9 | 16.7 | 16.6 | 17.0 | 16.7 | 16.9 | 16.8 | 16.9 |
| <i>potB</i> | 16.5 | 16.3 | 16.0 | 16.6 | 16.1 | 16.2 | 16.2 | 16.6 |
| <i>potC</i> | 16.8 | 16.5 | 16.5 | 16.7 | 16.6 | 16.7 | 16.4 | 16.6 |
| <i>potD</i> | 17.6 | 17.6 | 17.6 | 17.8 | 17.4 | 17.5 | 17.4 | 17.5 |
| <i>potE</i> | 13.2 | 13.1 | 13.0 | 13.6 | 13.1 | 13.3 | 13.1 | 13.2 |
| <i>potF</i> | 16.5 | 16.6 | 16.3 | 16.4 | 15.6 | 15.9 | 15.3 | 15.4 |
| <i>potG</i> | 14.7 | 14.7 | 14.6 | 14.5 | 13.9 | 14.0 | 13.9 | 13.9 |
| <i>potH</i> | 14.6 | 14.7 | 14.3 | 14.5 | 13.9 | 13.9 | 13.6 | 13.7 |
| <i>potI</i> | 14.1 | 14.2 | 13.8 | 13.7 | 13.5 | 13.6 | 13.4 | 13.5 |
| <i>poxB</i> | 15.9 | 16.1 | 15.9 | 15.9 | 15.5 | 15.6 | 15.4 | 15.7 |
| <i>ppa</i>  | 18.6 | 18.7 | 18.7 | 18.5 | 18.5 | 18.5 | 18.5 | 18.5 |
| <i>ppc</i>  | 18.2 | 17.7 | 18.2 | 18.3 | 18.5 | 17.9 | 18.8 | 18.6 |
| <i>ppdA</i> | 13.0 | 12.9 | 12.9 | 13.3 | 13.0 | 12.9 | 13.0 | 13.1 |
| <i>ppdB</i> | 13.1 | 13.1 | 13.0 | 13.0 | 13.2 | 13.1 | 13.1 | 13.0 |
| <i>ppdC</i> | 14.0 | 13.8 | 13.8 | 13.7 | 13.9 | 13.9 | 13.9 | 13.6 |
| <i>ppdD</i> | 12.8 | 12.7 | 12.6 | 12.7 | 12.9 | 12.7 | 12.7 | 12.6 |
| <i>pphA</i> | 13.4 | 13.5 | 13.1 | 13.3 | 13.3 | 13.3 | 13.1 | 13.2 |
| <i>pphB</i> | 13.0 | 13.0 | 12.7 | 12.9 | 12.9 | 13.1 | 12.8 | 12.8 |
| <i>ppiA</i> | 16.9 | 16.7 | 16.6 | 16.7 | 16.3 | 16.5 | 16.2 | 16.5 |
| <i>ppiB</i> | 19.0 | 18.9 | 18.7 | 18.8 | 18.8 | 18.9 | 18.5 | 18.6 |
| <i>ppiC</i> | 16.2 | 16.0 | 15.8 | 15.2 | 15.9 | 16.2 | 15.4 | 15.8 |
| <i>ppiD</i> | 16.8 | 16.8 | 16.6 | 16.9 | 16.9 | 17.0 | 16.9 | 16.9 |
| <i>ppk</i>  | 16.2 | 16.1 | 15.8 | 16.0 | 16.0 | 16.4 | 16.0 | 16.1 |
| <i>pppA</i> | 14.2 | 13.3 | 13.5 | 13.6 | 13.8 | 13.8 | 13.6 | 13.6 |
| <i>ppsA</i> | 16.9 | 16.8 | 17.1 | 16.9 | 15.2 | 15.3 | 15.3 | 15.4 |
| <i>ppsR</i> | 15.9 | 16.0 | 15.5 | 15.5 | 14.9 | 15.6 | 15.0 | 15.2 |
| <i>pptA</i> | 16.8 | 16.9 | 16.0 | 16.4 | 16.2 | 17.2 | 16.1 | 16.5 |
| <i>ppx</i>  | 15.6 | 15.6 | 15.4 | 15.5 | 15.5 | 15.6 | 15.5 | 15.5 |
| <i>pqiA</i> | 14.3 | 14.2 | 14.0 | 13.9 | 13.8 | 14.1 | 13.8 | 14.0 |
| <i>pqiB</i> | 14.9 | 14.8 | 14.6 | 14.6 | 14.5 | 14.7 | 14.4 | 14.7 |
| <i>pqqL</i> | 13.8 | 16.1 | 15.8 | 13.5 | 13.3 | 17.3 | 15.5 | 13.0 |
| <i>prc</i>  | 16.6 | 16.7 | 16.3 | 16.6 | 16.6 | 16.7 | 16.3 | 16.7 |
| <i>preA</i> | 13.5 | 13.3 | 13.0 | 13.5 | 14.4 | 13.4 | 13.2 | 14.2 |
| <i>preT</i> | 13.3 | 12.9 | 12.8 | 13.5 | 14.6 | 12.9 | 13.0 | 14.4 |
| <i>prfA</i> | 15.2 | 15.2 | 14.9 | 14.8 | 15.3 | 15.7 | 15.4 | 15.5 |
| <i>prfB</i> | 17.6 | 17.6 | 17.6 | 17.7 | 17.6 | 17.5 | 17.6 | 17.5 |
| <i>prfC</i> | 16.3 | 16.0 | 16.2 | 16.3 | 15.9 | 15.6 | 15.9 | 15.9 |
| <i>prfH</i> | 12.8 | 12.7 | 12.6 | 12.8 | 12.7 | 12.7 | 12.7 | 13.0 |
| <i>priA</i> | 14.0 | 14.0 | 13.9 | 13.6 | 13.9 | 14.1 | 14.0 | 14.0 |
| <i>priB</i> | 19.4 | 19.3 | 19.5 | 19.5 | 19.4 | 18.9 | 19.3 | 19.3 |
| <i>priC</i> | 14.5 | 14.3 | 14.5 | 14.2 | 14.5 | 14.6 | 14.6 | 14.5 |
| <i>prkB</i> | 15.4 | 15.4 | 15.4 | 15.3 | 15.1 | 15.4 | 15.2 | 15.1 |
| <i>prlC</i> | 15.7 | 15.7 | 15.8 | 15.6 | 15.2 | 15.5 | 15.4 | 15.3 |
| <i>prmA</i> | 14.9 | 14.9 | 14.9 | 14.7 | 14.7 | 14.9 | 14.8 | 14.9 |
| <i>prmB</i> | 17.1 | 17.1 | 16.6 | 17.1 | 16.9 | 17.2 | 16.8 | 16.9 |
| <i>prmC</i> | 13.9 | 13.8 | 13.7 | 13.6 | 14.0 | 14.1 | 14.0 | 14.1 |
| <i>proA</i> | 16.2 | 16.3 | 16.0 | 16.4 | 16.6 | 16.7 | 16.7 | 16.7 |
| <i>proB</i> | 16.3 | 16.3 | 16.3 | 16.1 | 16.9 | 16.9 | 17.1 | 16.9 |
| <i>proC</i> | 16.3 | 15.3 | 16.1 | 16.1 | 15.7 | 15.4 | 15.7 | 15.8 |
| <i>proK</i> | 14.4 | 14.2 | 14.4 | 13.9 | 14.1 | 14.5 | 13.8 | 13.6 |
| <i>proL</i> | 15.9 | 15.5 | 14.6 | 16.0 | 15.1 | 15.4 | 14.3 | 14.9 |

|             |      |      |      |      |      |      |      |      |
|-------------|------|------|------|------|------|------|------|------|
| <i>proM</i> | 16.2 | 15.9 | 15.4 | 15.0 | 15.4 | 16.0 | 15.0 | 15.5 |
| <i>proP</i> | 16.7 | 16.7 | 16.2 | 16.5 | 16.1 | 16.5 | 16.1 | 16.5 |
| <i>proQ</i> | 18.0 | 17.9 | 17.9 | 18.0 | 17.7 | 18.0 | 17.8 | 18.0 |
| <i>proS</i> | 16.9 | 16.8 | 16.9 | 16.9 | 16.8 | 16.7 | 17.1 | 17.0 |
| <i>proV</i> | 15.7 | 15.8 | 14.8 | 15.5 | 13.9 | 14.8 | 13.8 | 13.7 |
| <i>proW</i> | 14.8 | 14.9 | 14.5 | 14.5 | 13.4 | 13.9 | 13.7 | 13.3 |
| <i>proX</i> | 15.4 | 15.5 | 15.1 | 15.4 | 13.5 | 14.3 | 14.0 | 13.5 |
| <i>proY</i> | 14.5 | 14.5 | 14.4 | 14.0 | 14.6 | 15.0 | 14.9 | 14.8 |
| <i>prpB</i> | 12.9 | 12.8 | 12.9 | 13.3 | 13.1 | 12.8 | 12.9 | 12.5 |
| <i>prpC</i> | 12.8 | 12.7 | 12.6 | 14.1 | 12.7 | 12.6 | 12.7 | 12.7 |
| <i>prpD</i> | 12.7 | 12.6 | 12.6 | 13.0 | 12.9 | 12.6 | 12.6 | 12.5 |
| <i>prpE</i> | 12.7 | 12.7 | 12.7 | 13.1 | 12.9 | 12.7 | 12.9 | 12.6 |
| <i>prpR</i> | 13.1 | 13.2 | 13.0 | 13.5 | 12.8 | 12.7 | 12.7 | 12.6 |
| <i>prs</i>  | 18.2 | 18.1 | 18.1 | 18.1 | 18.2 | 18.4 | 18.5 | 18.5 |
| <i>pseG</i> | 12.8 | 12.7 | 12.8 | 13.3 | 12.8 | 12.7 | 12.7 | 12.6 |
| <i>pseK</i> | 13.0 | 12.9 | 12.8 | 13.0 | 13.0 | 12.9 | 12.8 | 12.5 |
| <i>psd</i>  | 16.2 | 16.3 | 16.2 | 16.0 | 16.5 | 16.7 | 16.8 | 16.6 |
| <i>psiE</i> | 14.6 | 15.4 | 14.2 | 13.8 | 14.2 | 15.4 | 14.3 | 14.8 |
| <i>psiF</i> | 15.5 | 15.6 | 14.8 | 15.2 | 14.8 | 15.1 | 14.3 | 14.7 |
| <i>pspA</i> | 16.0 | 15.9 | 15.4 | 15.7 | 15.6 | 15.7 | 15.0 | 15.3 |
| <i>pspB</i> | 15.7 | 15.7 | 15.1 | 15.5 | 15.2 | 15.8 | 15.2 | 15.5 |
| <i>pspC</i> | 14.9 | 14.7 | 14.6 | 14.4 | 14.6 | 15.0 | 14.6 | 14.7 |
| <i>pspD</i> | 14.6 | 14.5 | 14.4 | 14.6 | 14.3 | 14.6 | 14.4 | 14.5 |
| <i>pspE</i> | 15.8 | 15.7 | 15.7 | 15.1 | 15.5 | 15.8 | 15.3 | 15.7 |
| <i>pspF</i> | 13.8 | 13.8 | 13.6 | 13.4 | 13.7 | 14.0 | 13.7 | 13.7 |
| <i>pspG</i> | 14.1 | 14.1 | 13.9 | 13.5 | 13.8 | 14.3 | 13.9 | 14.0 |
| <i>psrD</i> | 18.6 | 18.6 | 17.8 | 18.3 | 18.0 | 18.6 | 17.6 | 18.0 |
| <i>psrO</i> | 13.1 | 13.0 | 12.9 | 13.2 | 13.0 | 13.1 | 12.8 | 13.0 |
| <i>pssA</i> | 16.9 | 16.8 | 16.5 | 16.8 | 16.7 | 17.0 | 16.7 | 16.8 |
| <i>pstA</i> | 14.7 | 14.5 | 14.7 | 14.1 | 14.4 | 14.3 | 14.4 | 14.4 |
| <i>pstB</i> | 16.2 | 15.9 | 15.9 | 15.8 | 15.7 | 15.9 | 15.7 | 15.7 |
| <i>pstC</i> | 15.1 | 14.8 | 15.1 | 14.7 | 14.5 | 14.5 | 14.5 | 14.5 |
| <i>pstS</i> | 16.4 | 16.0 | 16.4 | 16.2 | 15.7 | 15.6 | 15.7 | 15.6 |
| <i>pta</i>  | 16.1 | 16.6 | 16.2 | 16.2 | 17.7 | 17.8 | 18.2 | 18.2 |
| <i>pth</i>  | 15.9 | 15.7 | 15.6 | 15.7 | 15.6 | 15.8 | 15.5 | 15.5 |
| <i>ptrA</i> | 14.7 | 14.8 | 14.3 | 14.3 | 14.4 | 14.7 | 14.2 | 14.5 |
| <i>ptrB</i> | 14.5 | 14.5 | 14.1 | 14.4 | 13.9 | 14.3 | 14.0 | 14.2 |
| <i>ptsA</i> | 12.7 | 12.7 | 12.7 | 12.9 | 12.7 | 12.7 | 12.7 | 12.6 |
| <i>ptsG</i> | 18.5 | 18.5 | 18.7 | 18.6 | 18.6 | 18.6 | 18.8 | 18.8 |
| <i>ptsH</i> | 19.6 | 19.5 | 19.8 | 19.4 | 20.0 | 19.7 | 20.0 | 19.7 |
| <i>ptsI</i> | 18.8 | 18.7 | 18.5 | 18.9 | 19.2 | 19.1 | 19.2 | 19.2 |
| <i>ptsN</i> | 17.2 | 17.3 | 16.9 | 17.1 | 17.3 | 17.4 | 17.4 | 17.3 |
| <i>ptsP</i> | 15.9 | 15.8 | 15.5 | 15.7 | 15.8 | 16.0 | 15.7 | 15.9 |
| <i>purA</i> | 17.9 | 17.9 | 18.2 | 17.8 | 18.5 | 18.1 | 18.5 | 18.4 |
| <i>purB</i> | 17.9 | 17.8 | 17.7 | 18.0 | 17.2 | 17.4 | 17.3 | 17.4 |
| <i>purC</i> | 18.6 | 18.6 | 18.3 | 18.6 | 18.7 | 18.6 | 18.8 | 18.9 |
| <i>purD</i> | 16.7 | 16.7 | 16.7 | 16.7 | 16.6 | 16.3 | 16.7 | 16.6 |
| <i>purE</i> | 17.1 | 17.1 | 17.1 | 16.7 | 17.1 | 16.9 | 17.1 | 17.2 |
| <i>purF</i> | 17.6 | 17.5 | 17.4 | 17.5 | 17.1 | 17.4 | 17.4 | 17.4 |
| <i>purH</i> | 17.4 | 17.4 | 17.4 | 17.5 | 17.2 | 17.1 | 17.4 | 17.2 |
| <i>purK</i> | 16.7 | 16.7 | 16.5 | 16.5 | 16.8 | 16.5 | 16.7 | 16.9 |
| <i>purL</i> | 17.0 | 17.1 | 17.0 | 17.0 | 17.0 | 17.1 | 17.2 | 17.1 |
| <i>purM</i> | 17.8 | 17.9 | 17.7 | 17.9 | 18.1 | 17.8 | 18.0 | 17.9 |
| <i>purN</i> | 17.0 | 16.9 | 16.7 | 16.9 | 16.8 | 16.9 | 16.8 | 16.9 |
| <i>purR</i> | 16.6 | 16.4 | 16.2 | 16.3 | 16.2 | 16.7 | 16.2 | 16.6 |
| <i>purT</i> | 16.6 | 16.7 | 16.6 | 16.7 | 16.5 | 16.6 | 16.6 | 16.6 |
| <i>purU</i> | 17.9 | 17.9 | 17.3 | 17.8 | 17.6 | 17.8 | 17.4 | 17.6 |
| <i>putA</i> | 13.9 | 13.8 | 13.9 | 13.6 | 13.1 | 13.3 | 13.2 | 12.9 |
| <i>putP</i> | 15.9 | 16.3 | 15.8 | 16.1 | 14.9 | 15.0 | 14.7 | 14.8 |
| <i>puuA</i> | 15.6 | 14.5 | 15.2 | 15.4 | 13.0 | 12.9 | 12.9 | 13.1 |
| <i>puuB</i> | 14.6 | 13.5 | 14.4 | 14.5 | 12.9 | 12.9 | 13.0 | 12.8 |

|             |      |      |      |      |      |      |      |      |
|-------------|------|------|------|------|------|------|------|------|
| <i>puuC</i> | 15.1 | 13.9 | 14.9 | 15.3 | 13.2 | 13.1 | 13.2 | 13.0 |
| <i>puuD</i> | 15.6 | 14.6 | 15.2 | 15.4 | 13.4 | 13.5 | 13.3 | 13.3 |
| <i>puuE</i> | 14.4 | 13.4 | 14.2 | 14.2 | 13.0 | 12.9 | 13.0 | 12.9 |
| <i>puuP</i> | 13.9 | 13.5 | 13.7 | 13.6 | 13.1 | 13.1 | 12.9 | 12.9 |
| <i>puuR</i> | 15.4 | 14.6 | 15.0 | 15.4 | 13.9 | 14.0 | 13.7 | 13.8 |
| <i>pykA</i> | 16.8 | 16.8 | 16.7 | 16.9 | 18.5 | 18.3 | 18.6 | 18.6 |
| <i>pykF</i> | 18.2 | 18.3 | 18.0 | 18.4 | 18.8 | 18.8 | 18.9 | 18.9 |
| <i>pyrB</i> | 19.6 | 19.6 | 19.8 | 19.6 | 19.8 | 19.4 | 19.8 | 19.7 |
| <i>pyrC</i> | 18.2 | 18.4 | 18.1 | 18.3 | 18.1 | 18.0 | 18.1 | 18.3 |
| <i>pyrD</i> | 17.7 | 17.6 | 17.2 | 17.6 | 18.5 | 18.3 | 18.1 | 18.4 |
| <i>pyrE</i> | 13.8 | 13.7 | 13.5 | 13.7 | 13.3 | 13.3 | 13.3 | 13.7 |
| <i>pyrF</i> | 16.7 | 16.7 | 16.3 | 16.5 | 16.3 | 16.1 | 16.1 | 16.4 |
| <i>pyrG</i> | 17.3 | 17.2 | 17.2 | 17.4 | 17.7 | 17.4 | 17.5 | 17.5 |
| <i>pyrH</i> | 17.7 | 17.4 | 17.4 | 17.6 | 17.5 | 17.3 | 17.3 | 17.2 |
| <i>pyrI</i> | 20.0 | 20.0 | 20.0 | 20.0 | 19.9 | 19.8 | 20.1 | 20.1 |
| <i>pyrL</i> | 19.3 | 19.2 | 19.6 | 18.9 | 19.2 | 19.1 | 19.0 | 19.2 |
| <i>qmcA</i> | 15.0 | 15.0 | 14.8 | 14.6 | 15.0 | 15.4 | 15.1 | 15.1 |
| <i>qor</i>  | 15.7 | 15.8 | 15.3 | 15.3 | 15.9 | 16.1 | 15.5 | 15.9 |
| <i>qseB</i> | 14.0 | 14.0 | 13.7 | 13.7 | 13.8 | 14.0 | 13.7 | 13.7 |
| <i>qseC</i> | 13.6 | 13.6 | 13.4 | 13.4 | 13.4 | 13.5 | 13.3 | 13.4 |
| <i>qseD</i> | 14.4 | 14.3 | 14.0 | 13.8 | 14.5 | 14.6 | 14.6 | 14.7 |
| <i>queA</i> | 15.0 | 14.9 | 14.7 | 14.4 | 14.5 | 14.6 | 14.4 | 14.7 |
| <i>queC</i> | 15.2 | 15.2 | 15.0 | 15.0 | 15.0 | 15.2 | 14.9 | 15.0 |
| <i>queD</i> | 14.9 | 14.7 | 14.5 | 13.8 | 14.2 | 14.5 | 14.0 | 14.5 |
| <i>queF</i> | 15.5 | 15.4 | 15.2 | 15.2 | 15.2 | 15.4 | 15.1 | 15.3 |
| <i>racC</i> | 12.8 | 13.0 | 12.7 | 13.3 | 13.0 | 13.2 | 12.7 | 12.7 |
| <i>racR</i> | 16.6 | 16.6 | 16.0 | 16.2 | 16.8 | 17.0 | 15.9 | 16.3 |
| <i>radA</i> | 14.7 | 14.6 | 14.6 | 14.4 | 14.8 | 14.5 | 14.6 | 14.6 |
| <i>raiA</i> | 18.3 | 18.0 | 18.0 | 18.1 | 17.6 | 18.2 | 17.3 | 17.2 |
| <i>rarA</i> | 14.7 | 14.8 | 14.6 | 14.4 | 14.7 | 15.1 | 14.8 | 14.9 |
| <i>rarD</i> | 14.1 | 13.9 | 13.8 | 13.9 | 13.0 | 13.0 | 13.0 | 12.9 |
| <i>ravA</i> | 14.9 | 14.9 | 14.5 | 14.5 | 15.7 | 16.0 | 15.9 | 16.1 |
| <i>rbbA</i> | 15.2 | 14.9 | 15.1 | 15.0 | 14.5 | 14.8 | 14.7 | 14.7 |
| <i>rbfA</i> | 16.3 | 16.1 | 16.1 | 16.2 | 16.0 | 16.2 | 16.2 | 16.1 |
| <i>rbn</i>  | 14.6 | 14.5 | 14.3 | 14.1 | 14.1 | 14.6 | 14.3 | 14.4 |
| <i>rbsA</i> | 14.4 | 14.8 | 14.6 | 14.0 | 14.0 | 14.5 | 14.0 | 14.1 |
| <i>rbsB</i> | 16.8 | 16.8 | 16.7 | 16.6 | 16.2 | 16.5 | 15.7 | 16.2 |
| <i>rbsC</i> | 15.4 | 15.5 | 15.6 | 15.0 | 14.7 | 15.1 | 14.5 | 14.6 |
| <i>rbsD</i> | 17.6 | 17.6 | 17.7 | 17.0 | 17.1 | 17.4 | 16.7 | 16.7 |
| <i>rbsK</i> | 15.3 | 15.3 | 15.4 | 15.2 | 15.1 | 15.3 | 15.0 | 15.1 |
| <i>rbsR</i> | 13.6 | 13.5 | 13.4 | 13.5 | 13.2 | 13.4 | 13.2 | 13.3 |
| <i>rcnA</i> | 14.7 | 15.7 | 15.5 | 14.5 | 13.0 | 15.6 | 16.6 | 13.1 |
| <i>rcnR</i> | 15.4 | 15.5 | 15.3 | 14.6 | 14.0 | 15.3 | 15.2 | 14.0 |
| <i>rcaA</i> | 13.7 | 13.6 | 13.2 | 13.3 | 13.0 | 13.1 | 12.8 | 12.9 |
| <i>rcaB</i> | 18.2 | 18.1 | 17.6 | 18.0 | 17.9 | 18.2 | 17.8 | 18.1 |
| <i>rcaC</i> | 14.5 | 14.6 | 14.1 | 14.1 | 14.3 | 14.7 | 14.1 | 14.4 |
| <i>rcaD</i> | 16.0 | 16.1 | 15.6 | 15.9 | 16.0 | 16.2 | 15.7 | 15.8 |
| <i>rcaF</i> | 17.1 | 17.2 | 17.0 | 16.6 | 16.9 | 17.6 | 17.1 | 17.2 |
| <i>rdgB</i> | 15.8 | 15.5 | 15.7 | 15.6 | 15.2 | 15.4 | 15.4 | 15.4 |
| <i>rdgC</i> | 15.9 | 15.9 | 15.5 | 15.6 | 15.3 | 15.7 | 15.2 | 15.5 |
| <i>rdlA</i> | 15.9 | 15.6 | 15.9 | 16.1 | 15.8 | 15.9 | 15.6 | 15.4 |
| <i>rdlB</i> | 15.6 | 15.4 | 15.9 | 15.5 | 15.7 | 15.4 | 15.5 | 14.7 |
| <i>rdlC</i> | 15.3 | 15.0 | 15.7 | 15.5 | 15.6 | 15.3 | 15.4 | 14.7 |
| <i>rdlD</i> | 14.2 | 14.6 | 14.4 | 13.7 | 14.4 | 14.4 | 13.8 | 13.7 |
| <i>rdoA</i> | 16.1 | 15.8 | 15.6 | 15.8 | 15.8 | 15.9 | 15.5 | 15.8 |
| <i>recA</i> | 16.8 | 17.1 | 17.2 | 16.9 | 16.9 | 16.8 | 16.8 | 16.7 |
| <i>recB</i> | 14.4 | 14.3 | 14.1 | 14.2 | 14.2 | 14.3 | 14.1 | 14.3 |
| <i>recC</i> | 14.3 | 14.3 | 14.1 | 14.0 | 14.2 | 14.3 | 14.2 | 14.2 |
| <i>recD</i> | 14.1 | 14.1 | 13.8 | 13.8 | 13.9 | 14.1 | 13.9 | 14.1 |
| <i>recE</i> | 13.0 | 13.0 | 12.8 | 14.4 | 13.1 | 13.2 | 13.0 | 12.8 |
| <i>recF</i> | 14.8 | 14.5 | 14.5 | 14.4 | 14.6 | 14.5 | 14.4 | 14.3 |

|             |      |      |      |      |      |      |      |      |
|-------------|------|------|------|------|------|------|------|------|
| <i>recG</i> | 14.5 | 14.5 | 14.5 | 14.2 | 14.3 | 14.5 | 14.5 | 14.4 |
| <i>recJ</i> | 14.9 | 14.8 | 14.8 | 14.8 | 14.8 | 14.8 | 14.9 | 15.0 |
| <i>recN</i> | 14.6 | 15.6 | 15.4 | 14.3 | 13.9 | 14.4 | 14.2 | 14.2 |
| <i>recO</i> | 15.3 | 15.2 | 14.8 | 14.9 | 15.3 | 15.4 | 15.0 | 15.3 |
| <i>recQ</i> | 14.9 | 14.9 | 14.7 | 14.6 | 14.6 | 14.8 | 14.7 | 14.9 |
| <i>recR</i> | 16.1 | 16.1 | 16.3 | 15.9 | 16.1 | 15.9 | 16.1 | 16.0 |
| <i>recT</i> | 13.4 | 13.4 | 13.2 | 13.2 | 13.2 | 13.7 | 13.3 | 13.2 |
| <i>recX</i> | 13.3 | 13.7 | 13.2 | 13.1 | 13.0 | 13.4 | 13.2 | 13.2 |
| <i>relA</i> | 15.7 | 15.7 | 15.5 | 15.8 | 15.8 | 15.8 | 15.7 | 15.8 |
| <i>relB</i> | 16.2 | 16.3 | 15.8 | 15.9 | 16.1 | 16.4 | 15.9 | 16.1 |
| <i>relE</i> | 16.3 | 16.2 | 16.0 | 15.9 | 16.4 | 16.5 | 16.1 | 16.2 |
| <i>rem</i>  | 13.6 | 13.5 | 13.3 | 13.5 | 13.3 | 13.9 | 13.3 | 13.5 |
| <i>renD</i> | 14.8 | 14.8 | 14.4 | 14.6 | 15.1 | 15.1 | 14.4 | 14.6 |
| <i>rep</i>  | 14.6 | 14.5 | 14.4 | 14.4 | 14.5 | 14.5 | 14.3 | 14.5 |
| <i>rfaD</i> | 17.5 | 17.4 | 17.2 | 17.3 | 17.2 | 17.6 | 17.3 | 17.4 |
| <i>rfaE</i> | 16.0 | 16.0 | 16.0 | 15.9 | 16.0 | 16.0 | 16.0 | 16.0 |
| <i>rfaH</i> | 15.0 | 14.9 | 14.6 | 14.5 | 14.5 | 14.9 | 14.4 | 14.6 |
| <i>rfaL</i> | 15.5 | 15.2 | 15.0 | 15.5 | 15.0 | 14.8 | 14.5 | 14.8 |
| <i>rfaS</i> | 14.2 | 13.9 | 13.9 | 14.0 | 14.2 | 13.9 | 13.5 | 13.5 |
| <i>rfaZ</i> | 14.3 | 14.2 | 14.0 | 14.2 | 13.9 | 14.1 | 13.7 | 13.9 |
| <i>rfbA</i> | 17.5 | 17.3 | 16.8 | 17.6 | 17.4 | 17.4 | 17.0 | 17.1 |
| <i>rfbB</i> | 17.5 | 17.0 | 16.9 | 17.7 | 17.2 | 17.0 | 16.9 | 17.0 |
| <i>rfbC</i> | 17.2 | 17.1 | 16.5 | 17.5 | 16.8 | 16.9 | 16.5 | 16.8 |
| <i>rfbD</i> | 17.4 | 16.8 | 16.9 | 17.4 | 17.1 | 17.0 | 16.9 | 16.9 |
| <i>rfbX</i> | 16.6 | 16.3 | 16.0 | 16.6 | 16.2 | 16.4 | 16.0 | 16.2 |
| <i>rfc</i>  | 16.0 | 15.9 | 15.5 | 16.0 | 15.6 | 15.6 | 15.3 | 15.4 |
| <i>rfe</i>  | 16.0 | 15.9 | 15.7 | 15.9 | 16.1 | 16.1 | 16.1 | 16.4 |
| <i>rffA</i> | 14.9 | 14.8 | 14.7 | 14.6 | 14.8 | 14.9 | 14.9 | 15.0 |
| <i>rffC</i> | 14.7 | 14.6 | 14.4 | 14.1 | 14.5 | 14.6 | 14.5 | 14.6 |
| <i>rffD</i> | 15.3 | 15.2 | 15.0 | 15.3 | 15.2 | 15.1 | 15.1 | 15.2 |
| <i>rffE</i> | 15.4 | 15.3 | 15.1 | 15.2 | 15.4 | 15.2 | 15.1 | 15.2 |
| <i>rffG</i> | 15.4 | 15.3 | 15.1 | 15.3 | 15.2 | 15.3 | 15.2 | 15.4 |
| <i>rffH</i> | 14.8 | 14.6 | 14.7 | 14.6 | 14.8 | 14.6 | 14.7 | 14.7 |
| <i>rffM</i> | 14.5 | 14.3 | 14.0 | 14.2 | 14.1 | 14.2 | 13.8 | 13.9 |
| <i>rffT</i> | 14.3 | 14.2 | 14.0 | 13.9 | 14.1 | 14.2 | 14.1 | 14.3 |
| <i>rhaA</i> | 12.9 | 12.9 | 12.7 | 13.2 | 13.1 | 12.9 | 13.1 | 12.7 |
| <i>rhaB</i> | 12.7 | 12.7 | 12.6 | 13.0 | 12.7 | 12.7 | 12.7 | 12.6 |
| <i>rhaD</i> | 12.9 | 12.9 | 12.8 | 12.9 | 12.8 | 12.8 | 12.8 | 12.7 |
| <i>rhaM</i> | 12.9 | 12.9 | 12.8 | 13.0 | 13.0 | 12.9 | 12.9 | 12.7 |
| <i>rhaR</i> | 12.7 | 12.7 | 12.7 | 13.0 | 12.8 | 12.8 | 12.7 | 12.7 |
| <i>rhaS</i> | 13.0 | 13.0 | 12.9 | 12.9 | 13.3 | 12.9 | 12.9 | 12.9 |
| <i>rhaT</i> | 13.1 | 13.1 | 13.0 | 13.2 | 13.1 | 13.0 | 13.0 | 12.8 |
| <i>rhlB</i> | 17.1 | 17.0 | 16.9 | 16.8 | 16.9 | 17.1 | 16.9 | 16.8 |
| <i>rhlE</i> | 14.3 | 14.0 | 14.0 | 14.5 | 14.1 | 14.2 | 14.2 | 14.2 |
| <i>rho</i>  | 17.9 | 17.8 | 17.9 | 17.9 | 18.0 | 17.9 | 18.1 | 18.1 |
| <i>rhoL</i> | 19.2 | 19.1 | 19.1 | 18.8 | 19.3 | 19.2 | 19.1 | 19.2 |
| <i>rhsA</i> | 13.2 | 13.1 | 13.1 | 13.3 | 13.4 | 13.1 | 13.4 | 13.0 |
| <i>rhsB</i> | 13.1 | 13.0 | 13.1 | 13.2 | 13.4 | 13.1 | 13.4 | 12.9 |
| <i>rhsC</i> | 13.1 | 13.1 | 13.1 | 13.4 | 13.4 | 13.2 | 13.5 | 13.0 |
| <i>rhsD</i> | 13.0 | 13.0 | 12.9 | 13.2 | 13.3 | 13.2 | 13.3 | 12.9 |
| <i>rhsE</i> | 13.3 | 13.0 | 12.9 | 13.1 | 13.2 | 12.9 | 13.2 | 12.8 |
| <i>rhtA</i> | 13.4 | 13.3 | 13.3 | 13.1 | 13.2 | 13.3 | 13.3 | 13.1 |
| <i>rhtB</i> | 15.1 | 15.3 | 14.8 | 14.9 | 15.2 | 15.5 | 15.4 | 15.6 |
| <i>rhtC</i> | 15.1 | 15.2 | 15.0 | 14.6 | 15.4 | 15.7 | 15.6 | 15.7 |
| <i>ribA</i> | 15.9 | 15.9 | 15.7 | 15.6 | 15.7 | 15.9 | 15.5 | 15.7 |
| <i>ribB</i> | 16.1 | 16.2 | 16.2 | 15.9 | 17.1 | 17.2 | 17.5 | 17.2 |
| <i>ribC</i> | 16.1 | 16.1 | 15.9 | 15.9 | 16.6 | 16.6 | 16.3 | 16.4 |
| <i>ribD</i> | 15.8 | 15.8 | 15.8 | 15.7 | 15.8 | 15.9 | 15.8 | 15.8 |
| <i>ribE</i> | 17.5 | 17.4 | 17.5 | 17.6 | 17.5 | 17.3 | 17.5 | 17.4 |
| <i>ribF</i> | 16.7 | 16.6 | 16.5 | 16.4 | 17.0 | 17.0 | 16.8 | 16.8 |
| <i>rihA</i> | 15.1 | 14.7 | 15.1 | 14.8 | 14.3 | 14.5 | 14.4 | 14.3 |

|             |      |      |      |      |      |      |      |      |
|-------------|------|------|------|------|------|------|------|------|
| <i>rihB</i> | 12.8 | 12.7 | 12.6 | 13.1 | 12.8 | 12.8 | 12.8 | 12.6 |
| <i>rihC</i> | 13.9 | 13.7 | 14.0 | 14.5 | 13.4 | 13.6 | 13.6 | 13.4 |
| <i>rimI</i> | 16.2 | 16.0 | 15.7 | 16.0 | 15.8 | 15.9 | 15.7 | 16.1 |
| <i>rimJ</i> | 16.7 | 16.7 | 16.3 | 16.6 | 16.7 | 16.9 | 16.5 | 16.6 |
| <i>rimK</i> | 14.8 | 14.9 | 14.8 | 14.5 | 14.6 | 14.5 | 14.4 | 14.4 |
| <i>rimL</i> | 15.1 | 15.1 | 14.5 | 14.7 | 14.8 | 15.2 | 14.6 | 14.9 |
| <i>rimM</i> | 19.3 | 19.2 | 19.2 | 19.3 | 19.5 | 19.2 | 19.4 | 19.3 |
| <i>rimN</i> | 16.1 | 15.9 | 15.7 | 16.0 | 15.5 | 15.8 | 15.5 | 15.7 |
| <i>rimO</i> | 15.6 | 15.3 | 15.5 | 15.3 | 15.0 | 14.9 | 14.9 | 15.0 |
| <i>rimP</i> | 17.8 | 17.6 | 17.4 | 17.7 | 17.8 | 17.6 | 17.6 | 17.6 |
| <i>rlmB</i> | 14.7 | 14.7 | 14.4 | 14.8 | 14.3 | 14.6 | 14.3 | 14.4 |
| <i>rlmC</i> | 14.3 | 14.2 | 14.1 | 13.7 | 14.0 | 14.2 | 13.9 | 14.1 |
| <i>rlmD</i> | 15.6 | 15.6 | 15.1 | 15.6 | 15.4 | 15.5 | 15.1 | 15.2 |
| <i>rlmE</i> | 16.8 | 16.8 | 16.8 | 16.5 | 17.2 | 17.0 | 16.9 | 17.0 |
| <i>rlmF</i> | 14.8 | 15.0 | 15.1 | 14.6 | 15.2 | 15.3 | 15.2 | 15.0 |
| <i>rlmG</i> | 14.2 | 13.9 | 13.9 | 13.7 | 13.8 | 13.9 | 13.8 | 13.9 |
| <i>rlmH</i> | 15.6 | 15.6 | 15.7 | 15.4 | 15.8 | 15.5 | 15.6 | 15.5 |
| <i>rlmI</i> | 15.9 | 15.8 | 15.6 | 15.6 | 15.7 | 15.9 | 15.6 | 15.8 |
| <i>rlmL</i> | 15.3 | 15.2 | 15.2 | 15.2 | 15.1 | 15.1 | 15.1 | 15.1 |
| <i>rlmM</i> | 15.6 | 15.5 | 15.2 | 15.5 | 15.4 | 15.7 | 15.4 | 15.6 |
| <i>rlmN</i> | 15.5 | 15.4 | 15.2 | 15.4 | 14.8 | 15.0 | 14.8 | 14.9 |
| <i>rlpA</i> | 16.2 | 16.2 | 16.2 | 16.1 | 16.2 | 16.2 | 16.3 | 16.1 |
| <i>rluA</i> | 14.3 | 14.1 | 14.1 | 13.7 | 14.0 | 13.9 | 13.8 | 14.0 |
| <i>rluB</i> | 16.4 | 15.9 | 15.9 | 16.1 | 16.4 | 16.0 | 16.0 | 16.4 |
| <i>rluC</i> | 15.5 | 15.5 | 15.3 | 15.3 | 15.2 | 15.2 | 14.8 | 15.1 |
| <i>rluD</i> | 16.0 | 16.0 | 15.8 | 15.8 | 15.6 | 15.9 | 15.7 | 15.9 |
| <i>rluE</i> | 15.3 | 15.3 | 14.8 | 14.9 | 15.0 | 15.4 | 14.9 | 15.1 |
| <i>rluF</i> | 15.0 | 15.1 | 14.7 | 14.6 | 15.1 | 15.3 | 14.8 | 15.0 |
| <i>rmf</i>  | 18.2 | 18.8 | 18.4 | 17.9 | 19.1 | 18.6 | 17.9 | 18.3 |
| <i>rmuC</i> | 13.9 | 13.9 | 13.8 | 13.8 | 13.6 | 13.9 | 13.7 | 13.7 |
| <i>rna</i>  | 15.3 | 15.4 | 15.2 | 14.8 | 15.1 | 15.4 | 15.1 | 15.2 |
| <i>rnb</i>  | 17.6 | 17.5 | 17.4 | 17.6 | 17.2 | 17.5 | 17.4 | 17.5 |
| <i>rnc</i>  | 17.0 | 16.8 | 16.5 | 16.6 | 16.7 | 17.0 | 16.7 | 16.9 |
| <i>rnd</i>  | 14.6 | 14.6 | 14.3 | 14.3 | 14.3 | 14.5 | 14.3 | 14.4 |
| <i>rne</i>  | 17.2 | 17.0 | 16.9 | 17.1 | 16.9 | 17.0 | 16.9 | 16.9 |
| <i>rng</i>  | 15.8 | 15.7 | 15.4 | 15.5 | 15.8 | 15.8 | 15.4 | 15.6 |
| <i>rnhA</i> | 14.9 | 14.9 | 14.6 | 14.5 | 14.8 | 14.8 | 14.6 | 14.6 |
| <i>rnhB</i> | 15.1 | 15.0 | 14.9 | 14.7 | 14.8 | 15.0 | 14.7 | 14.8 |
| <i>rnk</i>  | 14.9 | 14.9 | 15.1 | 14.7 | 14.3 | 14.9 | 14.9 | 14.4 |
| <i>rnlA</i> | 15.9 | 15.7 | 15.5 | 15.6 | 17.2 | 17.0 | 16.8 | 16.8 |
| <i>rnlB</i> | 14.9 | 14.8 | 14.7 | 14.3 | 15.5 | 15.7 | 15.6 | 15.7 |
| <i>rnpA</i> | 17.6 | 17.6 | 17.7 | 17.4 | 17.5 | 17.5 | 17.7 | 17.6 |
| <i>rnpB</i> | 18.6 | 18.7 | 19.4 | 18.5 | 19.4 | 18.3 | 19.1 | 18.6 |
| <i>rnr</i>  | 16.0 | 16.0 | 15.9 | 15.9 | 15.8 | 16.0 | 15.8 | 15.9 |
| <i>rnt</i>  | 15.0 | 15.0 | 14.8 | 14.8 | 14.8 | 15.1 | 14.9 | 15.1 |
| <i>rob</i>  | 17.0 | 17.1 | 16.8 | 16.5 | 16.9 | 17.2 | 17.0 | 17.1 |
| <i>rodZ</i> | 16.7 | 16.7 | 16.5 | 16.5 | 16.6 | 16.8 | 16.7 | 16.7 |
| <i>rof</i>  | 15.9 | 15.9 | 15.4 | 16.1 | 15.5 | 16.2 | 15.5 | 16.3 |
| <i>rpe</i>  | 17.2 | 17.0 | 16.9 | 17.0 | 17.0 | 17.1 | 17.0 | 17.1 |
| <i>rph</i>  | 15.5 | 15.3 | 15.2 | 15.1 | 15.1 | 14.9 | 14.7 | 15.0 |
| <i>rpiA</i> | 17.5 | 17.4 | 17.2 | 17.1 | 17.3 | 17.3 | 16.9 | 17.4 |
| <i>rpiB</i> | 14.3 | 14.1 | 13.9 | 14.3 | 14.2 | 14.5 | 14.0 | 14.1 |
| <i>rpiR</i> | 15.0 | 14.8 | 14.5 | 14.5 | 14.7 | 14.9 | 14.5 | 14.6 |
| <i>rplA</i> | 19.6 | 19.4 | 19.5 | 19.7 | 19.6 | 19.4 | 19.5 | 19.4 |
| <i>rplB</i> | 19.6 | 19.4 | 19.8 | 19.7 | 19.6 | 19.4 | 19.7 | 19.6 |
| <i>rplC</i> | 19.7 | 19.6 | 20.0 | 19.8 | 19.9 | 19.4 | 19.7 | 19.7 |
| <i>rplD</i> | 19.6 | 19.5 | 19.9 | 19.8 | 19.7 | 19.3 | 19.6 | 19.6 |
| <i>rplE</i> | 20.2 | 20.1 | 20.4 | 20.2 | 20.2 | 20.0 | 20.2 | 20.2 |
| <i>rplF</i> | 19.6 | 19.4 | 19.9 | 19.8 | 19.8 | 19.3 | 19.7 | 19.7 |
| <i>rplI</i> | 18.6 | 18.4 | 18.3 | 18.7 | 17.9 | 18.0 | 18.0 | 18.4 |
| <i>rplJ</i> | 19.8 | 19.7 | 19.9 | 19.8 | 19.7 | 19.6 | 19.8 | 19.8 |

|             |      |      |      |      |      |      |      |      |
|-------------|------|------|------|------|------|------|------|------|
| <i>rplK</i> | 19.7 | 19.5 | 19.9 | 19.7 | 19.8 | 19.6 | 19.7 | 19.6 |
| <i>rplL</i> | 20.3 | 20.1 | 20.0 | 20.3 | 20.0 | 20.2 | 20.0 | 20.2 |
| <i>rplM</i> | 19.6 | 19.5 | 19.8 | 19.6 | 19.7 | 19.3 | 19.6 | 19.5 |
| <i>rplN</i> | 20.1 | 20.0 | 20.2 | 20.0 | 20.2 | 19.9 | 20.1 | 20.1 |
| <i>rplO</i> | 19.5 | 19.5 | 19.9 | 19.6 | 19.7 | 19.3 | 19.7 | 19.6 |
| <i>rplP</i> | 19.7 | 19.6 | 20.0 | 19.8 | 19.8 | 19.6 | 19.8 | 19.8 |
| <i>rplQ</i> | 19.4 | 19.2 | 19.2 | 19.5 | 19.0 | 19.2 | 19.1 | 19.3 |
| <i>rplR</i> | 19.5 | 19.4 | 19.9 | 19.5 | 19.6 | 19.3 | 19.6 | 19.5 |
| <i>rplS</i> | 19.0 | 18.9 | 19.1 | 19.1 | 19.0 | 19.0 | 18.8 | 19.0 |
| <i>rplT</i> | 18.7 | 18.6 | 18.4 | 18.9 | 18.5 | 18.8 | 18.7 | 18.9 |
| <i>rplU</i> | 19.9 | 19.9 | 20.0 | 19.7 | 19.9 | 19.7 | 19.7 | 19.9 |
| <i>rplV</i> | 20.2 | 20.0 | 20.0 | 20.2 | 20.0 | 19.9 | 19.9 | 20.1 |
| <i>rplW</i> | 20.0 | 19.9 | 20.1 | 20.1 | 20.0 | 19.8 | 20.0 | 20.0 |
| <i>rplX</i> | 20.1 | 20.1 | 20.4 | 20.1 | 20.2 | 20.1 | 20.2 | 20.2 |
| <i>rplY</i> | 19.6 | 19.3 | 19.3 | 19.2 | 19.3 | 19.4 | 18.9 | 19.1 |
| <i>rpmA</i> | 18.9 | 18.8 | 18.8 | 18.7 | 18.6 | 18.5 | 18.4 | 18.7 |
| <i>rpmB</i> | 19.6 | 19.5 | 19.6 | 19.4 | 19.6 | 19.4 | 19.5 | 19.5 |
| <i>rpmC</i> | 19.8 | 19.8 | 20.0 | 19.9 | 19.8 | 19.4 | 19.4 | 19.9 |
| <i>rpmD</i> | 20.0 | 19.7 | 20.3 | 20.0 | 20.1 | 19.7 | 20.1 | 19.9 |
| <i>rpmE</i> | 19.3 | 19.1 | 19.2 | 18.7 | 18.9 | 19.0 | 18.6 | 18.9 |
| <i>rpmF</i> | 19.3 | 19.3 | 19.6 | 19.0 | 19.2 | 19.2 | 19.2 | 19.2 |
| <i>rpmG</i> | 20.1 | 19.9 | 20.0 | 19.9 | 19.6 | 19.9 | 19.7 | 19.6 |
| <i>rpmH</i> | 19.6 | 19.3 | 19.2 | 19.1 | 19.1 | 19.2 | 18.9 | 19.3 |
| <i>rpmI</i> | 19.9 | 19.7 | 19.7 | 19.8 | 19.8 | 19.8 | 19.9 | 20.0 |
| <i>rpmJ</i> | 20.7 | 20.6 | 20.6 | 20.6 | 20.6 | 20.6 | 20.5 | 20.7 |
| <i>rpoA</i> | 19.7 | 19.6 | 20.0 | 19.7 | 19.8 | 19.6 | 19.8 | 19.6 |
| <i>rpoB</i> | 18.4 | 18.4 | 18.4 | 18.7 | 18.5 | 18.5 | 18.6 | 18.5 |
| <i>rpoC</i> | 17.9 | 17.8 | 17.9 | 18.1 | 18.0 | 17.9 | 18.2 | 18.1 |
| <i>rpoD</i> | 17.2 | 17.2 | 17.1 | 17.3 | 16.9 | 17.4 | 17.3 | 17.2 |
| <i>rpoE</i> | 17.1 | 17.4 | 17.1 | 16.9 | 18.1 | 17.5 | 17.6 | 17.8 |
| <i>rpoH</i> | 16.3 | 16.4 | 16.1 | 16.2 | 16.2 | 16.3 | 16.2 | 16.4 |
| <i>rpoN</i> | 16.7 | 16.7 | 16.4 | 16.6 | 16.8 | 16.9 | 16.7 | 16.7 |
| <i>rpoS</i> | 18.6 | 18.7 | 18.5 | 18.7 | 18.4 | 18.6 | 18.3 | 18.3 |
| <i>rpoZ</i> | 17.9 | 17.9 | 17.9 | 17.9 | 17.8 | 17.9 | 17.8 | 17.9 |
| <i>rppH</i> | 17.4 | 17.4 | 16.9 | 17.4 | 17.4 | 17.5 | 17.0 | 17.2 |
| <i>rprA</i> | 13.5 | 13.7 | 13.2 | 13.0 | 13.1 | 13.3 | 12.9 | 13.2 |
| <i>rpsA</i> | 19.4 | 19.2 | 19.5 | 19.5 | 19.4 | 19.1 | 19.3 | 19.3 |
| <i>rpsB</i> | 19.2 | 19.0 | 19.2 | 19.3 | 19.2 | 19.0 | 19.2 | 19.1 |
| <i>rpsC</i> | 19.6 | 19.6 | 19.8 | 19.8 | 19.6 | 19.4 | 19.6 | 19.6 |
| <i>rpsD</i> | 19.9 | 19.8 | 20.1 | 19.9 | 20.0 | 19.9 | 20.0 | 19.9 |
| <i>rpsE</i> | 19.8 | 19.7 | 20.0 | 19.9 | 19.9 | 19.6 | 19.8 | 19.8 |
| <i>rpsF</i> | 19.3 | 19.2 | 19.6 | 19.4 | 19.3 | 19.0 | 19.3 | 19.2 |
| <i>rpsG</i> | 20.0 | 19.8 | 20.0 | 19.9 | 20.0 | 19.8 | 20.0 | 19.9 |
| <i>rpsH</i> | 20.1 | 19.9 | 20.3 | 20.1 | 20.0 | 19.9 | 20.0 | 20.1 |
| <i>rpsI</i> | 19.3 | 19.2 | 19.2 | 19.3 | 18.9 | 19.0 | 19.1 | 19.1 |
| <i>rpsJ</i> | 20.0 | 19.9 | 20.2 | 20.0 | 20.1 | 19.8 | 20.0 | 20.1 |
| <i>rpsK</i> | 19.8 | 19.7 | 20.0 | 19.9 | 19.9 | 19.5 | 19.9 | 19.8 |
| <i>rpsL</i> | 19.8 | 19.8 | 20.3 | 19.7 | 20.0 | 19.7 | 20.0 | 19.7 |
| <i>rpsM</i> | 19.9 | 19.8 | 20.0 | 19.9 | 20.0 | 19.7 | 19.8 | 19.9 |
| <i>rpsN</i> | 20.1 | 20.0 | 20.1 | 20.2 | 20.1 | 19.9 | 20.0 | 20.1 |
| <i>rpsO</i> | 19.0 | 18.9 | 19.0 | 18.6 | 18.8 | 18.7 | 18.5 | 19.0 |
| <i>rpsP</i> | 19.7 | 19.5 | 19.5 | 19.5 | 19.5 | 19.6 | 19.4 | 19.6 |
| <i>rpsQ</i> | 19.5 | 19.2 | 19.5 | 19.5 | 19.3 | 19.3 | 19.0 | 19.2 |
| <i>rpsR</i> | 20.1 | 19.9 | 19.8 | 20.1 | 19.6 | 19.8 | 19.8 | 19.9 |
| <i>rpsS</i> | 20.3 | 20.0 | 20.3 | 20.2 | 20.2 | 20.1 | 20.1 | 20.2 |
| <i>rpsT</i> | 19.3 | 19.2 | 19.0 | 18.8 | 18.8 | 19.2 | 18.4 | 18.9 |
| <i>rpsU</i> | 19.4 | 19.4 | 19.8 | 19.0 | 19.5 | 19.6 | 19.3 | 19.6 |
| <i>rraA</i> | 16.9 | 17.0 | 17.0 | 16.5 | 17.5 | 17.6 | 17.6 | 17.6 |
| <i>rraB</i> | 17.7 | 17.8 | 17.5 | 17.5 | 17.9 | 17.5 | 17.4 | 17.7 |
| <i>rrfA</i> | 19.6 | 19.7 | 19.6 | 19.5 | 19.5 | 19.4 | 18.9 | 19.1 |
| <i>rrfB</i> | 19.6 | 19.5 | 19.8 | 19.9 | 19.6 | 19.4 | 18.8 | 19.3 |



|             |      |      |      |      |      |      |      |      |
|-------------|------|------|------|------|------|------|------|------|
| <i>rrfC</i> | 19.9 | 19.9 | 20.0 | 19.8 | 19.7 | 19.7 | 19.2 | 19.6 |
| <i>rrfD</i> | 19.8 | 19.8 | 20.0 | 19.7 | 19.8 | 19.6 | 19.3 | 19.7 |
| <i>rrfE</i> | 20.0 | 20.0 | 20.0 | 19.8 | 19.6 | 19.7 | 19.0 | 19.6 |
| <i>rrfF</i> | 19.5 | 19.6 | 20.0 | 19.6 | 19.5 | 19.5 | 19.1 | 19.3 |
| <i>rrfG</i> | 19.2 | 19.6 | 19.9 | 19.7 | 19.5 | 19.3 | 19.0 | 19.4 |
| <i>rrfH</i> | 20.0 | 20.1 | 19.9 | 20.1 | 19.9 | 20.0 | 19.2 | 19.9 |
| <i>rrlA</i> | 21.0 | 21.0 | 20.9 | 21.0 | 21.0 | 21.0 | 21.0 | 21.0 |
| <i>rrlB</i> | 20.9 | 21.0 | 20.9 | 21.0 | 21.0 | 21.0 | 20.9 | 21.0 |
| <i>rrlC</i> | 21.0 | 21.0 | 20.9 | 21.0 | 21.0 | 21.0 | 20.9 | 21.0 |
| <i>rrlD</i> | 21.0 | 21.0 | 20.9 | 21.1 | 21.0 | 21.0 | 21.0 | 21.0 |
| <i>rrlE</i> | 21.0 | 21.0 | 20.9 | 21.0 | 21.0 | 21.0 | 21.0 | 21.0 |
| <i>rrlG</i> | 21.0 | 21.0 | 20.9 | 21.0 | 21.0 | 21.0 | 21.0 | 21.0 |
| <i>rrlH</i> | 21.0 | 21.0 | 20.9 | 21.0 | 21.0 | 21.0 | 20.9 | 21.0 |
| <i>rrmA</i> | 14.8 | 14.8 | 14.3 | 14.2 | 14.3 | 14.6 | 14.2 | 14.4 |
| <i>rrsA</i> | 21.0 | 21.0 | 20.9 | 21.0 | 21.0 | 21.0 | 20.9 | 21.0 |
| <i>rrsB</i> | 21.0 | 21.0 | 20.9 | 21.0 | 21.0 | 21.0 | 21.0 | 21.0 |
| <i>rrsC</i> | 20.9 | 21.0 | 20.9 | 21.0 | 21.0 | 20.9 | 21.0 | 21.0 |
| <i>rrsD</i> | 20.9 | 20.9 | 21.0 | 21.0 | 20.9 | 20.9 | 20.9 | 20.9 |
| <i>rrsE</i> | 20.9 | 21.0 | 20.9 | 21.0 | 21.0 | 21.0 | 21.0 | 21.0 |
| <i>rrsG</i> | 20.9 | 20.9 | 20.9 | 20.9 | 21.0 | 20.9 | 21.0 | 20.9 |
| <i>rrsH</i> | 21.0 | 21.0 | 20.9 | 21.0 | 21.0 | 21.0 | 21.0 | 21.0 |
| <i>rsd</i>  | 16.8 | 16.7 | 16.4 | 16.5 | 14.8 | 15.7 | 14.8 | 15.3 |
| <i>rseA</i> | 17.8 | 18.2 | 17.8 | 17.8 | 18.5 | 18.0 | 18.3 | 18.5 |
| <i>rseB</i> | 16.4 | 16.7 | 16.0 | 16.4 | 16.4 | 16.5 | 16.4 | 16.8 |
| <i>rseC</i> | 15.0 | 15.1 | 15.0 | 14.6 | 15.3 | 15.1 | 15.2 | 15.5 |
| <i>rseP</i> | 16.8 | 16.8 | 16.5 | 16.7 | 16.9 | 16.9 | 16.6 | 16.8 |
| <i>rseX</i> | 13.0 | 13.1 | 13.0 | 14.0 | 13.1 | 13.2 | 12.9 | 13.1 |
| <i>rsgA</i> | 16.0 | 15.9 | 15.9 | 15.6 | 16.2 | 16.4 | 16.2 | 16.1 |
| <i>rsmA</i> | 16.7 | 16.7 | 16.2 | 16.4 | 16.5 | 16.8 | 16.4 | 16.6 |
| <i>rsmB</i> | 15.6 | 15.4 | 15.0 | 15.3 | 15.3 | 15.5 | 15.2 | 15.6 |
| <i>rsmC</i> | 15.2 | 15.1 | 14.9 | 14.6 | 14.8 | 15.0 | 14.7 | 15.0 |
| <i>rsmD</i> | 15.5 | 15.5 | 15.1 | 15.2 | 15.3 | 15.5 | 15.1 | 15.2 |
| <i>rsmE</i> | 16.2 | 15.9 | 16.0 | 16.1 | 15.9 | 16.1 | 15.9 | 15.9 |
| <i>rsmF</i> | 14.6 | 14.5 | 14.2 | 14.0 | 14.2 | 14.6 | 14.2 | 14.3 |
| <i>rsmG</i> | 15.0 | 14.8 | 14.6 | 14.7 | 14.6 | 14.8 | 14.5 | 14.7 |
| <i>rsmH</i> | 16.2 | 16.1 | 16.0 | 15.8 | 16.2 | 16.3 | 16.0 | 16.1 |
| <i>rsmI</i> | 15.0 | 15.0 | 14.8 | 14.7 | 14.8 | 15.1 | 14.8 | 14.9 |
| <i>rspA</i> | 13.0 | 13.0 | 12.9 | 13.1 | 12.9 | 12.9 | 12.8 | 12.6 |
| <i>rspB</i> | 12.9 | 12.9 | 12.7 | 13.1 | 12.9 | 12.8 | 12.7 | 12.6 |
| <i>rssA</i> | 15.8 | 15.6 | 15.2 | 15.5 | 15.9 | 15.9 | 15.5 | 15.7 |
| <i>rssB</i> | 15.3 | 15.3 | 15.0 | 15.2 | 15.4 | 15.3 | 15.1 | 15.5 |
| <i>rstA</i> | 15.7 | 15.7 | 15.4 | 15.2 | 16.1 | 16.6 | 16.4 | 16.2 |
| <i>rstB</i> | 14.3 | 14.4 | 14.1 | 13.9 | 14.6 | 15.0 | 14.8 | 15.0 |
| <i>rsuA</i> | 16.4 | 16.4 | 16.1 | 16.3 | 16.4 | 16.5 | 16.4 | 16.5 |
| <i>rsxA</i> | 15.1 | 15.1 | 14.9 | 14.5 | 14.2 | 14.5 | 14.2 | 14.5 |
| <i>rsxB</i> | 15.1 | 15.1 | 14.9 | 14.5 | 14.4 | 14.6 | 14.3 | 14.3 |
| <i>rsxC</i> | 15.6 | 15.7 | 15.2 | 15.6 | 14.5 | 14.9 | 14.5 | 14.9 |
| <i>rsxD</i> | 15.0 | 15.0 | 14.8 | 14.5 | 14.2 | 14.3 | 14.1 | 14.3 |
| <i>rsxE</i> | 14.9 | 14.9 | 14.5 | 14.4 | 14.0 | 14.2 | 14.0 | 14.2 |
| <i>rsxG</i> | 14.8 | 14.8 | 14.5 | 14.6 | 14.2 | 14.2 | 14.1 | 14.3 |
| <i>rtcA</i> | 13.5 | 13.5 | 13.3 | 13.5 | 13.5 | 13.5 | 13.4 | 13.4 |
| <i>rtcB</i> | 13.8 | 13.7 | 13.4 | 13.6 | 13.6 | 13.6 | 13.4 | 13.5 |
| <i>rtcR</i> | 12.9 | 12.9 | 12.9 | 13.0 | 12.9 | 13.1 | 13.0 | 12.9 |
| <i>rtn</i>  | 14.1 | 14.1 | 13.8 | 13.7 | 13.8 | 14.2 | 13.8 | 13.8 |
| <i>rttR</i> | 14.3 | 14.2 | 14.2 | 13.9 | 14.0 | 14.0 | 13.7 | 13.6 |
| <i>rusA</i> | 13.1 | 13.3 | 12.9 | 13.2 | 13.6 | 13.2 | 13.1 | 12.7 |
| <i>rutA</i> | 12.8 | 12.9 | 12.7 | 12.9 | 12.8 | 12.6 | 12.7 | 12.5 |
| <i>rutB</i> | 12.8 | 12.7 | 12.7 | 13.1 | 12.8 | 12.7 | 12.8 | 12.5 |
| <i>rutC</i> | 13.0 | 13.0 | 12.9 | 13.1 | 13.1 | 13.0 | 13.1 | 12.9 |
| <i>rutD</i> | 12.8 | 12.9 | 12.8 | 13.2 | 12.8 | 12.9 | 12.9 | 12.6 |
| <i>rutE</i> | 12.8 | 12.9 | 12.8 | 13.4 | 13.0 | 12.8 | 12.9 | 12.6 |

|                 |      |      |      |      |      |      |      |      |
|-----------------|------|------|------|------|------|------|------|------|
| <i>rutF</i>     | 12.9 | 12.9 | 12.8 | 13.1 | 13.1 | 12.9 | 13.0 | 12.7 |
| <i>rutG</i>     | 13.0 | 13.0 | 13.0 | 13.3 | 13.3 | 13.1 | 13.2 | 13.1 |
| <i>rutR</i>     | 14.3 | 14.2 | 13.8 | 13.9 | 13.7 | 14.0 | 13.6 | 13.9 |
| <i>ruvA</i>     | 15.5 | 15.7 | 15.6 | 15.3 | 15.4 | 15.9 | 15.5 | 15.5 |
| <i>ruvB</i>     | 15.2 | 15.3 | 15.1 | 14.9 | 15.0 | 15.5 | 15.2 | 15.4 |
| <i>ruvC</i>     | 15.7 | 15.7 | 15.6 | 15.6 | 16.0 | 15.9 | 16.0 | 16.1 |
| <i>rybA/mtS</i> | 15.4 | 14.8 | 13.9 | 14.4 | 14.7 | 13.8 | 13.2 | 15.1 |
| <i>rybB</i>     | 15.7 | 15.9 | 14.9 | 14.4 | 14.8 | 16.0 | 14.1 | 15.1 |
| <i>rydB</i>     | 16.3 | 16.5 | 15.9 | 16.0 | 17.5 | 18.0 | 17.5 | 17.6 |
| <i>rydC</i>     | 13.2 | 13.3 | 13.1 | 13.2 | 13.2 | 13.5 | 13.1 | 13.3 |
| <i>ryeA</i>     | 16.5 | 16.3 | 16.1 | 15.7 | 14.4 | 15.9 | 14.2 | 14.9 |
| <i>ryeB</i>     | 14.2 | 13.9 | 13.6 | 13.1 | 13.6 | 14.4 | 13.4 | 13.8 |
| <i>ryfA</i>     | 15.0 | 15.1 | 14.6 | 14.4 | 15.0 | 15.5 | 15.0 | 15.6 |
| <i>ryfB</i>     | 14.6 | 14.7 | 14.6 | 13.9 | 14.5 | 14.9 | 13.9 | 14.3 |
| <i>ryfD</i>     | 19.3 | 19.0 | 18.9 | 18.7 | 19.2 | 18.9 | 18.4 | 19.4 |
| <i>ryhB</i>     | 14.9 | 19.1 | 14.1 | 14.3 | 13.5 | 18.9 | 13.8 | 13.9 |
| <i>ryjA</i>     | 14.6 | 14.7 | 14.6 | 14.3 | 14.9 | 14.8 | 14.0 | 13.9 |
| <i>ryjB</i>     | 14.9 | 14.8 | 15.4 | 14.2 | 15.1 | 15.4 | 15.0 | 14.9 |
| <i>rzoD</i>     | 13.8 | 13.7 | 13.4 | 13.3 | 13.6 | 13.9 | 13.7 | 13.8 |
| <i>rzoR</i>     | 13.5 | 13.6 | 13.2 | 13.5 | 13.4 | 13.7 | 13.6 | 13.6 |
| <i>rzpD</i>     | 13.4 | 13.3 | 13.1 | 13.4 | 13.3 | 13.6 | 13.4 | 13.4 |
| <i>rzpQ</i>     | 13.6 | 13.6 | 13.2 | 13.2 | 13.4 | 13.6 | 13.4 | 13.5 |
| <i>rzpR</i>     | 13.4 | 13.5 | 13.2 | 13.5 | 13.5 | 13.6 | 13.4 | 13.5 |
| <i>sad</i>      | 14.5 | 14.5 | 14.3 | 14.3 | 14.5 | 14.5 | 14.3 | 14.3 |
| <i>safA</i>     | 12.9 | 13.1 | 12.8 | 14.0 | 12.8 | 13.0 | 12.7 | 13.0 |
| <i>sanA</i>     | 14.4 | 14.3 | 14.1 | 13.5 | 14.2 | 14.5 | 14.0 | 14.5 |
| <i>sapA</i>     | 14.9 | 14.7 | 14.7 | 14.4 | 14.7 | 14.9 | 14.9 | 14.9 |
| <i>sapB</i>     | 14.4 | 14.3 | 14.1 | 13.8 | 14.1 | 14.4 | 14.3 | 14.6 |
| <i>sapC</i>     | 14.0 | 13.8 | 13.9 | 13.9 | 13.9 | 13.9 | 14.0 | 14.1 |
| <i>sapD</i>     | 14.9 | 14.8 | 14.7 | 14.8 | 14.9 | 14.9 | 14.8 | 15.1 |
| <i>sapF</i>     | 14.7 | 14.6 | 14.3 | 14.3 | 14.6 | 14.7 | 14.5 | 14.7 |
| <i>sbcB</i>     | 15.1 | 15.1 | 14.9 | 14.9 | 14.7 | 15.4 | 14.9 | 15.0 |
| <i>sbcC</i>     | 14.2 | 14.3 | 13.9 | 14.1 | 13.7 | 14.2 | 13.8 | 13.8 |
| <i>sbcD</i>     | 14.5 | 14.5 | 14.3 | 14.4 | 14.2 | 14.7 | 14.4 | 14.5 |
| <i>sbmA</i>     | 13.8 | 13.9 | 13.7 | 13.3 | 13.7 | 14.0 | 13.8 | 13.7 |
| <i>sbmC</i>     | 15.2 | 15.2 | 15.0 | 15.0 | 16.0 | 16.1 | 15.5 | 15.6 |
| <i>sbp</i>      | 15.6 | 15.5 | 15.3 | 15.7 | 15.1 | 14.9 | 14.6 | 14.8 |
| <i>scpA</i>     | 12.7 | 12.7 | 12.6 | 12.9 | 12.8 | 12.8 | 12.7 | 12.7 |
| <i>scpB</i>     | 13.2 | 13.1 | 13.0 | 13.4 | 13.1 | 13.3 | 13.1 | 13.0 |
| <i>scpC</i>     | 12.8 | 12.9 | 12.7 | 13.0 | 12.8 | 12.9 | 12.8 | 12.8 |
| <i>sdaA</i>     | 14.2 | 14.2 | 14.1 | 13.9 | 14.2 | 14.5 | 14.3 | 14.6 |
| <i>sdaB</i>     | 14.0 | 13.7 | 13.8 | 13.8 | 13.9 | 13.7 | 14.0 | 14.1 |
| <i>sdaC</i>     | 14.7 | 14.3 | 14.4 | 14.4 | 14.8 | 14.7 | 15.0 | 15.2 |
| <i>sdhA</i>     | 18.0 | 16.1 | 18.5 | 18.1 | 13.4 | 13.1 | 13.5 | 14.1 |
| <i>sdhB</i>     | 18.3 | 16.4 | 18.4 | 18.3 | 13.6 | 13.6 | 13.6 | 14.4 |
| <i>sdhC</i>     | 18.5 | 16.6 | 18.8 | 18.4 | 13.2 | 13.1 | 13.3 | 14.1 |
| <i>sdhD</i>     | 18.9 | 17.0 | 19.0 | 18.8 | 13.5 | 13.5 | 13.8 | 14.6 |
| <i>sdiA</i>     | 14.7 | 14.4 | 14.0 | 14.9 | 14.3 | 14.7 | 14.2 | 14.3 |
| <i>sdsP</i>     | 12.7 | 12.8 | 12.6 | 12.9 | 12.8 | 12.8 | 12.7 | 12.6 |
| <i>sdsQ</i>     | 12.6 | 12.6 | 12.5 | 12.8 | 12.7 | 12.6 | 12.6 | 12.5 |
| <i>sdsR</i>     | 12.7 | 12.8 | 12.6 | 12.9 | 12.8 | 12.7 | 12.7 | 12.5 |
| <i>secA</i>     | 16.3 | 16.4 | 16.3 | 16.3 | 16.3 | 16.3 | 16.4 | 16.4 |
| <i>secB</i>     | 18.3 | 18.3 | 18.0 | 18.3 | 18.0 | 18.2 | 18.1 | 18.2 |
| <i>secD</i>     | 16.5 | 16.3 | 16.4 | 16.6 | 16.6 | 16.5 | 16.6 | 16.6 |
| <i>secE</i>     | 18.0 | 17.9 | 18.0 | 17.7 | 18.2 | 17.9 | 18.2 | 18.2 |
| <i>secF</i>     | 15.9 | 15.8 | 15.8 | 16.0 | 16.0 | 15.9 | 16.0 | 16.2 |
| <i>secG</i>     | 18.4 | 18.2 | 17.9 | 18.1 | 18.4 | 18.3 | 17.9 | 18.6 |
| <i>secM</i>     | 16.9 | 17.0 | 17.0 | 16.6 | 17.1 | 17.3 | 17.1 | 16.9 |
| <i>secY</i>     | 19.7 | 19.5 | 19.8 | 19.8 | 19.8 | 19.5 | 19.7 | 19.7 |
| <i>selA</i>     | 15.2 | 15.1 | 15.1 | 15.1 | 15.4 | 15.3 | 15.4 | 15.3 |
| <i>selB</i>     | 15.1 | 15.1 | 15.1 | 15.0 | 15.3 | 15.1 | 15.4 | 15.4 |

|             |      |      |      |      |      |      |      |      |
|-------------|------|------|------|------|------|------|------|------|
| <i>selC</i> | 14.7 | 15.0 | 14.6 | 13.5 | 14.2 | 14.9 | 14.3 | 14.3 |
| <i>selD</i> | 16.8 | 16.7 | 16.6 | 16.7 | 16.6 | 16.6 | 16.5 | 16.5 |
| <i>seqA</i> | 17.7 | 17.7 | 17.2 | 17.8 | 17.5 | 17.9 | 17.4 | 17.6 |
| <i>serA</i> | 19.5 | 19.6 | 19.7 | 19.5 | 19.8 | 19.6 | 19.9 | 19.8 |
| <i>serB</i> | 15.3 | 15.2 | 15.2 | 15.0 | 15.1 | 14.9 | 15.0 | 14.9 |
| <i>serC</i> | 18.9 | 19.0 | 18.8 | 19.1 | 19.3 | 19.0 | 19.0 | 19.3 |
| <i>serS</i> | 17.5 | 17.5 | 17.2 | 17.5 | 18.2 | 18.1 | 18.2 | 18.3 |
| <i>serT</i> | 15.7 | 15.8 | 15.3 | 14.9 | 15.4 | 15.9 | 14.1 | 14.7 |
| <i>serU</i> | 14.6 | 14.5 | 14.6 | 14.3 | 14.6 | 14.5 | 14.0 | 14.0 |
| <i>serV</i> | 17.7 | 17.8 | 18.4 | 17.9 | 19.1 | 17.8 | 18.1 | 17.7 |
| <i>serW</i> | 17.2 | 16.9 | 17.2 | 16.4 | 17.3 | 17.4 | 15.7 | 16.6 |
| <i>serX</i> | 16.2 | 16.2 | 16.8 | 15.6 | 16.9 | 16.5 | 15.5 | 15.6 |
| <i>setA</i> | 14.0 | 14.0 | 13.8 | 13.7 | 14.2 | 14.3 | 14.1 | 14.2 |
| <i>setB</i> | 13.0 | 12.9 | 12.8 | 13.1 | 13.3 | 13.2 | 13.1 | 13.0 |
| <i>setC</i> | 12.7 | 12.7 | 12.6 | 13.3 | 12.7 | 12.7 | 12.6 | 12.6 |
| <i>sfmA</i> | 12.9 | 12.9 | 12.7 | 13.2 | 12.8 | 12.9 | 12.7 | 12.8 |
| <i>sfmC</i> | 12.6 | 12.6 | 12.5 | 12.8 | 12.7 | 12.7 | 12.5 | 12.5 |
| <i>sfmD</i> | 12.7 | 12.7 | 12.6 | 13.0 | 12.8 | 12.8 | 12.7 | 12.6 |
| <i>sfmF</i> | 13.1 | 13.0 | 12.7 | 13.5 | 13.5 | 13.0 | 13.0 | 12.9 |
| <i>sfmH</i> | 12.7 | 12.7 | 12.6 | 12.8 | 12.8 | 12.8 | 12.7 | 12.9 |
| <i>sfsA</i> | 15.8 | 15.8 | 15.5 | 15.3 | 15.7 | 16.0 | 15.5 | 15.6 |
| <i>sfsB</i> | 13.7 | 13.6 | 13.4 | 13.4 | 13.5 | 13.6 | 13.6 | 13.5 |
| <i>sgbE</i> | 13.3 | 13.3 | 13.2 | 13.6 | 13.3 | 13.3 | 13.2 | 13.0 |
| <i>sgbH</i> | 13.0 | 12.9 | 12.9 | 13.1 | 13.0 | 12.9 | 13.0 | 12.8 |
| <i>sgbU</i> | 13.1 | 13.1 | 12.9 | 13.1 | 13.1 | 13.0 | 13.0 | 12.8 |
| <i>sgcA</i> | 13.7 | 13.7 | 13.4 | 13.4 | 13.3 | 13.6 | 13.5 | 13.3 |
| <i>sgcB</i> | 13.2 | 13.1 | 13.1 | 13.2 | 13.1 | 13.1 | 13.1 | 13.0 |
| <i>sgcC</i> | 12.8 | 12.9 | 12.8 | 12.9 | 12.9 | 12.9 | 12.9 | 12.7 |
| <i>sgcE</i> | 13.2 | 13.2 | 13.2 | 13.0 | 13.1 | 13.2 | 13.3 | 13.1 |
| <i>sgcQ</i> | 13.0 | 13.0 | 12.9 | 13.1 | 13.0 | 13.0 | 12.9 | 12.9 |
| <i>sgcR</i> | 13.2 | 13.2 | 13.1 | 13.1 | 13.4 | 13.3 | 13.2 | 13.1 |
| <i>sgcX</i> | 12.8 | 12.8 | 12.8 | 12.9 | 12.8 | 12.8 | 12.8 | 12.7 |
| <i>sgrR</i> | 14.2 | 14.1 | 14.0 | 13.8 | 14.0 | 14.3 | 14.2 | 14.2 |
| <i>sgrS</i> | 14.9 | 14.7 | 14.2 | 13.9 | 14.1 | 14.2 | 13.6 | 14.2 |
| <i>sgrT</i> | 15.6 | 15.3 | 14.7 | 14.4 | 14.6 | 14.6 | 14.0 | 14.7 |
| <i>shiA</i> | 15.3 | 17.1 | 15.0 | 15.1 | 15.0 | 17.0 | 15.1 | 15.2 |
| <i>shoB</i> | 14.0 | 13.9 | 13.5 | 14.1 | 13.9 | 13.9 | 13.4 | 13.6 |
| <i>sibA</i> | 14.3 | 14.5 | 14.6 | 13.6 | 14.3 | 15.2 | 13.9 | 13.9 |
| <i>sibB</i> | 13.7 | 14.0 | 13.8 | 13.2 | 14.0 | 14.2 | 13.6 | 13.7 |
| <i>sibC</i> | 14.9 | 15.2 | 14.4 | 14.0 | 14.6 | 15.3 | 13.8 | 14.6 |
| <i>sibD</i> | 18.4 | 18.3 | 17.3 | 17.2 | 18.5 | 18.5 | 16.9 | 18.3 |
| <i>sibE</i> | 16.3 | 16.3 | 16.2 | 15.1 | 16.6 | 17.1 | 15.8 | 15.6 |
| <i>sieB</i> | 13.3 | 13.4 | 13.0 | 13.1 | 13.2 | 13.5 | 12.9 | 13.3 |
| <i>sirA</i> | 15.7 | 15.6 | 15.4 | 15.0 | 15.5 | 15.7 | 15.3 | 15.7 |
| <i>sixA</i> | 16.1 | 16.2 | 15.9 | 15.6 | 16.1 | 16.3 | 16.0 | 16.2 |
| <i>slmA</i> | 16.5 | 16.4 | 16.4 | 16.4 | 15.8 | 16.2 | 15.9 | 15.9 |
| <i>slp</i>  | 17.0 | 16.8 | 16.3 | 16.7 | 18.9 | 18.0 | 18.5 | 18.9 |
| <i>slt</i>  | 14.8 | 14.8 | 14.7 | 14.5 | 14.5 | 14.6 | 14.4 | 14.6 |
| <i>slyA</i> | 17.0 | 17.1 | 16.3 | 16.7 | 16.7 | 17.1 | 16.3 | 17.0 |
| <i>slyB</i> | 18.1 | 18.2 | 18.0 | 17.9 | 18.7 | 18.3 | 18.6 | 18.8 |
| <i>slyD</i> | 17.7 | 17.8 | 17.9 | 17.8 | 18.0 | 17.5 | 17.9 | 17.7 |
| <i>slyX</i> | 15.3 | 15.2 | 15.0 | 14.5 | 14.8 | 15.2 | 14.6 | 14.9 |
| <i>smf</i>  | 14.8 | 14.9 | 14.7 | 14.7 | 15.6 | 15.1 | 15.2 | 15.1 |
| <i>smg</i>  | 17.3 | 17.3 | 16.7 | 17.2 | 17.7 | 17.8 | 17.4 | 17.5 |
| <i>smpA</i> | 16.7 | 16.8 | 16.9 | 16.5 | 16.8 | 16.8 | 16.7 | 16.8 |
| <i>smpB</i> | 17.3 | 17.4 | 16.9 | 17.1 | 17.0 | 17.4 | 16.9 | 16.9 |
| <i>smtA</i> | 16.0 | 16.0 | 15.7 | 15.8 | 15.9 | 16.0 | 15.7 | 15.8 |
| <i>sodA</i> | 18.8 | 18.9 | 19.6 | 18.7 | 13.3 | 15.6 | 15.3 | 14.3 |
| <i>sodB</i> | 19.3 | 15.1 | 19.2 | 19.3 | 19.1 | 16.3 | 19.2 | 19.2 |
| <i>sodC</i> | 15.2 | 15.3 | 15.0 | 14.8 | 14.9 | 15.1 | 14.7 | 14.9 |
| <i>sohA</i> | 15.7 | 15.8 | 15.1 | 14.8 | 15.9 | 16.0 | 15.3 | 15.7 |

|             |      |      |      |      |      |      |      |      |
|-------------|------|------|------|------|------|------|------|------|
| <i>sohB</i> | 16.5 | 16.5 | 16.1 | 16.3 | 16.4 | 16.6 | 16.1 | 16.4 |
| <i>sokA</i> | 14.3 | 14.2 | 14.1 | 14.1 | 14.3 | 14.2 | 14.0 | 14.1 |
| <i>sokB</i> | 13.7 | 13.7 | 13.6 | 14.4 | 13.6 | 14.0 | 13.4 | 13.4 |
| <i>sokC</i> | 14.7 | 14.6 | 14.5 | 14.1 | 14.4 | 14.6 | 14.2 | 14.3 |
| <i>solA</i> | 16.3 | 16.2 | 16.2 | 16.2 | 15.8 | 16.2 | 16.0 | 15.9 |
| <i>soxR</i> | 13.6 | 13.7 | 13.3 | 13.5 | 13.5 | 13.6 | 13.4 | 13.3 |
| <i>soxS</i> | 16.6 | 17.6 | 16.8 | 16.5 | 14.1 | 15.3 | 14.4 | 14.6 |
| <i>speA</i> | 16.7 | 16.9 | 16.6 | 16.8 | 16.2 | 16.5 | 16.2 | 16.3 |
| <i>speB</i> | 15.7 | 15.7 | 15.5 | 15.4 | 15.2 | 15.3 | 15.2 | 15.1 |
| <i>speC</i> | 14.8 | 15.0 | 14.7 | 14.6 | 14.5 | 15.0 | 14.5 | 14.6 |
| <i>speD</i> | 18.1 | 18.0 | 17.8 | 18.0 | 17.4 | 18.2 | 17.4 | 17.5 |
| <i>speE</i> | 18.0 | 18.0 | 17.7 | 18.1 | 17.4 | 17.9 | 17.3 | 17.3 |
| <i>speF</i> | 12.8 | 12.8 | 12.6 | 13.4 | 12.8 | 12.8 | 12.8 | 12.7 |
| <i>speG</i> | 17.1 | 17.1 | 16.7 | 17.1 | 16.6 | 17.2 | 16.6 | 16.8 |
| <i>spf</i>  | 18.5 | 18.4 | 17.8 | 17.7 | 18.2 | 18.7 | 17.5 | 18.0 |
| <i>spoT</i> | 16.3 | 16.2 | 16.1 | 16.2 | 16.2 | 16.5 | 16.3 | 16.3 |
| <i>sppA</i> | 15.3 | 15.2 | 15.0 | 15.7 | 15.1 | 15.3 | 15.0 | 15.3 |
| <i>spr</i>  | 18.0 | 17.9 | 17.7 | 17.9 | 17.7 | 18.0 | 17.5 | 17.7 |
| <i>spy</i>  | 14.7 | 15.5 | 15.2 | 14.2 | 13.6 | 14.6 | 13.9 | 13.7 |
| <i>sra</i>  | 19.8 | 19.9 | 19.3 | 19.5 | 19.5 | 19.6 | 18.7 | 19.5 |
| <i>sraA</i> | 13.6 | 13.4 | 13.4 | 15.1 | 13.4 | 13.5 | 13.3 | 13.4 |
| <i>sraF</i> | 14.5 | 14.2 | 14.3 | 13.6 | 14.3 | 14.4 | 13.6 | 13.7 |
| <i>srlA</i> | 13.2 | 13.2 | 13.3 | 13.5 | 12.8 | 12.9 | 12.8 | 12.9 |
| <i>srlB</i> | 13.4 | 13.9 | 13.5 | 13.0 | 13.1 | 13.1 | 13.1 | 13.0 |
| <i>srlD</i> | 13.6 | 13.6 | 13.5 | 13.3 | 13.2 | 13.3 | 13.2 | 13.2 |
| <i>srlE</i> | 13.2 | 13.1 | 13.2 | 13.4 | 12.9 | 12.8 | 12.9 | 12.6 |
| <i>srlR</i> | 15.1 | 15.0 | 14.6 | 14.8 | 15.1 | 15.5 | 15.0 | 15.4 |
| <i>srnB</i> | 16.0 | 15.8 | 15.8 | 15.6 | 15.7 | 15.9 | 15.7 | 15.7 |
| <i>sroA</i> | 16.9 | 17.0 | 16.9 | 16.0 | 16.5 | 16.9 | 16.4 | 16.6 |
| <i>sroC</i> | 16.4 | 16.5 | 16.0 | 16.1 | 14.8 | 15.2 | 14.5 | 14.5 |
| <i>sroD</i> | 14.7 | 14.6 | 14.5 | 13.9 | 14.6 | 14.7 | 14.3 | 14.1 |
| <i>sroE</i> | 17.6 | 17.7 | 17.2 | 17.3 | 17.7 | 17.8 | 17.2 | 16.9 |
| <i>sroG</i> | 15.8 | 16.0 | 16.9 | 15.5 | 17.8 | 16.6 | 17.5 | 16.4 |
| <i>sroH</i> | 16.9 | 17.1 | 16.5 | 16.9 | 16.3 | 16.8 | 15.8 | 16.9 |
| <i>ssb</i>  | 16.3 | 16.3 | 16.4 | 16.1 | 16.3 | 16.1 | 16.1 | 16.2 |
| <i>sseA</i> | 15.7 | 15.7 | 15.6 | 15.4 | 15.9 | 15.8 | 15.6 | 15.7 |
| <i>sseB</i> | 15.9 | 15.1 | 15.7 | 15.9 | 14.8 | 14.5 | 14.9 | 15.0 |
| <i>ssnA</i> | 12.7 | 12.7 | 12.6 | 12.9 | 12.8 | 12.8 | 12.7 | 12.6 |
| <i>sspA</i> | 17.4 | 17.3 | 17.3 | 17.3 | 17.4 | 17.3 | 17.4 | 17.7 |
| <i>sspB</i> | 16.7 | 16.7 | 16.6 | 16.6 | 16.6 | 16.4 | 16.6 | 17.0 |
| <i>ssrA</i> | 20.1 | 20.2 | 20.4 | 20.0 | 20.3 | 20.1 | 20.1 | 20.2 |
| <i>ssrS</i> | 18.9 | 19.2 | 19.6 | 18.5 | 19.7 | 18.9 | 19.1 | 19.1 |
| <i>ssrT</i> | 16.4 | 16.6 | 16.8 | 16.4 | 18.5 | 18.4 | 18.8 | 18.6 |
| <i>ssuA</i> | 13.1 | 13.0 | 13.0 | 13.2 | 13.0 | 13.0 | 12.9 | 12.8 |
| <i>ssuB</i> | 13.5 | 13.4 | 13.3 | 13.4 | 13.6 | 13.5 | 13.4 | 13.4 |
| <i>ssuC</i> | 12.9 | 12.8 | 12.9 | 12.7 | 12.9 | 12.9 | 12.9 | 12.7 |
| <i>ssuD</i> | 13.1 | 13.0 | 13.0 | 13.0 | 13.1 | 12.9 | 13.0 | 12.8 |
| <i>ssuE</i> | 13.0 | 12.8 | 12.9 | 13.0 | 12.8 | 12.9 | 12.8 | 12.8 |
| <i>stfE</i> | 12.9 | 12.9 | 12.7 | 13.0 | 12.9 | 13.0 | 12.8 | 12.7 |
| <i>stfR</i> | 13.2 | 13.1 | 12.8 | 13.3 | 13.1 | 13.2 | 13.1 | 13.7 |
| <i>sthA</i> | 16.5 | 16.3 | 16.4 | 16.3 | 14.0 | 14.6 | 14.1 | 14.4 |
| <i>stpA</i> | 18.4 | 18.1 | 17.9 | 17.8 | 17.9 | 18.2 | 17.5 | 17.9 |
| <i>sucA</i> | 18.2 | 17.7 | 18.4 | 18.2 | 15.2 | 15.5 | 15.5 | 15.6 |
| <i>sucB</i> | 18.3 | 17.8 | 18.6 | 18.3 | 15.5 | 15.6 | 15.8 | 15.9 |
| <i>sucC</i> | 18.5 | 17.9 | 18.9 | 18.6 | 15.4 | 15.5 | 15.5 | 15.7 |
| <i>sucD</i> | 18.1 | 17.6 | 18.6 | 18.2 | 14.9 | 15.1 | 15.1 | 15.2 |
| <i>sufA</i> | 15.3 | 17.9 | 18.1 | 14.8 | 14.6 | 15.7 | 15.7 | 14.5 |
| <i>sufB</i> | 15.2 | 17.5 | 17.9 | 15.1 | 14.3 | 15.4 | 15.6 | 14.5 |
| <i>sufC</i> | 15.2 | 17.3 | 17.6 | 14.8 | 14.4 | 15.4 | 15.5 | 14.6 |
| <i>sufD</i> | 14.9 | 17.2 | 17.5 | 14.9 | 14.3 | 15.2 | 15.5 | 14.5 |
| <i>sufE</i> | 14.8 | 17.2 | 17.0 | 14.5 | 14.1 | 15.3 | 15.2 | 14.6 |

|             |      |      |      |      |      |      |      |      |
|-------------|------|------|------|------|------|------|------|------|
| <i>sufS</i> | 14.5 | 16.7 | 17.1 | 14.4 | 14.2 | 14.9 | 15.2 | 14.3 |
| <i>sugE</i> | 13.9 | 13.7 | 13.7 | 13.3 | 14.1 | 14.0 | 13.9 | 14.0 |
| <i>suhB</i> | 16.4 | 16.1 | 16.1 | 16.2 | 16.0 | 15.8 | 15.6 | 16.0 |
| <i>sulA</i> | 15.4 | 16.7 | 16.2 | 15.1 | 15.3 | 15.9 | 15.3 | 15.4 |
| <i>surA</i> | 17.0 | 17.1 | 16.8 | 16.9 | 17.0 | 17.2 | 17.0 | 17.1 |
| <i>surE</i> | 15.7 | 15.6 | 15.7 | 15.4 | 15.6 | 15.5 | 15.6 | 15.4 |
| <i>sxy</i>  | 14.1 | 14.2 | 13.7 | 13.5 | 14.3 | 14.5 | 13.9 | 14.2 |
| <i>syd</i>  | 15.2 | 15.2 | 14.9 | 14.8 | 15.0 | 15.5 | 14.7 | 14.9 |
| <i>symE</i> | 13.5 | 13.7 | 13.3 | 13.4 | 13.2 | 13.5 | 13.3 | 13.2 |
| <i>symR</i> | 14.4 | 14.2 | 14.2 | 13.5 | 14.5 | 14.3 | 14.2 | 13.9 |
| <i>tabA</i> | 15.3 | 15.4 | 15.0 | 15.1 | 15.8 | 16.0 | 15.8 | 15.8 |
| <i>tadA</i> | 14.5 | 14.5 | 14.3 | 13.8 | 14.5 | 14.5 | 14.4 | 14.5 |
| <i>tag</i>  | 15.5 | 15.5 | 15.1 | 15.2 | 15.8 | 15.9 | 15.6 | 15.7 |
| <i>talA</i> | 17.2 | 17.3 | 16.7 | 17.1 | 16.7 | 16.8 | 16.2 | 16.7 |
| <i>talB</i> | 18.4 | 18.4 | 18.7 | 18.4 | 18.1 | 18.2 | 18.3 | 18.2 |
| <i>tam</i>  | 14.5 | 14.4 | 14.4 | 14.0 | 14.3 | 14.4 | 14.2 | 14.2 |
| <i>tap</i>  | 12.8 | 13.0 | 12.8 | 13.7 | 14.5 | 13.2 | 13.0 | 12.8 |
| <i>tar</i>  | 12.9 | 13.4 | 12.9 | 13.2 | 13.1 | 13.6 | 13.1 | 12.7 |
| <i>tas</i>  | 16.3 | 16.3 | 16.2 | 16.3 | 15.8 | 16.1 | 16.0 | 16.0 |
| <i>tatA</i> | 18.4 | 18.4 | 17.5 | 18.2 | 18.2 | 18.6 | 17.8 | 18.2 |
| <i>tatB</i> | 16.9 | 16.9 | 16.7 | 16.9 | 17.1 | 17.0 | 17.1 | 17.1 |
| <i>tatC</i> | 15.9 | 15.8 | 15.7 | 15.7 | 15.6 | 16.0 | 16.0 | 16.1 |
| <i>tatD</i> | 14.5 | 14.5 | 14.2 | 14.1 | 14.4 | 14.5 | 14.4 | 14.5 |
| <i>tatE</i> | 17.6 | 17.5 | 17.0 | 16.8 | 18.2 | 18.2 | 17.6 | 18.3 |
| <i>tauA</i> | 13.1 | 13.1 | 13.0 | 13.1 | 12.9 | 13.0 | 13.0 | 12.8 |
| <i>tauB</i> | 13.4 | 13.5 | 13.2 | 13.6 | 13.4 | 13.7 | 13.4 | 13.1 |
| <i>tauC</i> | 12.9 | 13.0 | 13.0 | 13.0 | 13.2 | 13.1 | 13.2 | 12.9 |
| <i>tauD</i> | 13.1 | 13.1 | 13.0 | 13.4 | 13.0 | 13.2 | 13.1 | 13.2 |
| <i>tbpA</i> | 16.8 | 17.0 | 16.6 | 16.6 | 16.1 | 16.3 | 16.0 | 16.1 |
| <i>tdcA</i> | 12.7 | 12.7 | 12.6 | 13.7 | 12.8 | 12.8 | 12.6 | 12.6 |
| <i>tdcB</i> | 12.9 | 12.9 | 12.7 | 13.1 | 12.9 | 12.8 | 12.8 | 12.7 |
| <i>tdcC</i> | 13.3 | 13.3 | 13.1 | 13.0 | 13.1 | 13.2 | 13.1 | 13.0 |
| <i>tdcD</i> | 13.1 | 13.1 | 12.9 | 12.9 | 12.9 | 13.0 | 12.9 | 12.9 |
| <i>tdcE</i> | 13.0 | 13.0 | 13.0 | 13.0 | 13.6 | 13.1 | 13.3 | 12.8 |
| <i>tdcF</i> | 13.4 | 13.2 | 13.1 | 13.2 | 13.1 | 13.3 | 13.2 | 13.0 |
| <i>tdcG</i> | 13.0 | 13.0 | 12.9 | 13.5 | 13.0 | 13.0 | 13.0 | 12.9 |
| <i>tdcR</i> | 12.8 | 12.9 | 12.7 | 13.0 | 12.9 | 12.9 | 12.6 | 12.9 |
| <i>tdh</i>  | 14.8 | 14.7 | 14.7 | 14.7 | 14.3 | 14.6 | 14.6 | 14.6 |
| <i>tdk</i>  | 15.7 | 15.7 | 15.0 | 15.4 | 15.4 | 15.7 | 14.9 | 15.2 |
| <i>tehA</i> | 14.7 | 14.7 | 14.2 | 14.1 | 14.6 | 14.7 | 14.3 | 14.4 |
| <i>tehB</i> | 16.1 | 16.2 | 15.5 | 15.8 | 16.2 | 16.0 | 15.7 | 15.9 |
| <i>tesA</i> | 15.6 | 15.6 | 15.4 | 15.2 | 15.4 | 15.9 | 15.5 | 15.4 |
| <i>tesB</i> | 15.1 | 15.0 | 14.8 | 14.5 | 14.6 | 14.9 | 14.6 | 14.7 |
| <i>tfaD</i> | 13.1 | 13.1 | 12.9 | 13.5 | 13.2 | 13.0 | 13.0 | 12.8 |
| <i>tfaE</i> | 13.0 | 13.1 | 12.9 | 13.2 | 13.0 | 13.1 | 12.9 | 13.0 |
| <i>tfaQ</i> | 13.8 | 13.7 | 13.3 | 13.8 | 13.6 | 13.8 | 13.5 | 13.4 |
| <i>tfaR</i> | 13.7 | 13.7 | 13.4 | 14.6 | 13.8 | 14.0 | 13.5 | 13.4 |
| <i>tfaS</i> | 13.5 | 13.6 | 13.3 | 13.3 | 13.6 | 13.5 | 13.4 | 13.3 |
| <i>tfaX</i> | 13.0 | 13.1 | 12.7 | 13.1 | 13.3 | 13.3 | 12.9 | 12.9 |
| <i>tff</i>  | 19.3 | 19.3 | 19.7 | 19.5 | 19.7 | 19.1 | 19.2 | 18.9 |
| <i>tgt</i>  | 16.7 | 16.4 | 16.6 | 16.5 | 16.7 | 16.2 | 16.4 | 16.4 |
| <i>thiC</i> | 17.8 | 18.0 | 18.0 | 17.9 | 17.0 | 17.5 | 17.3 | 17.0 |
| <i>thiD</i> | 15.7 | 16.3 | 15.7 | 15.7 | 15.4 | 15.8 | 15.6 | 15.5 |
| <i>thiE</i> | 17.1 | 17.4 | 17.4 | 17.1 | 16.5 | 16.7 | 16.7 | 16.5 |
| <i>thiF</i> | 16.9 | 17.3 | 17.1 | 17.1 | 16.4 | 16.6 | 16.5 | 16.2 |
| <i>thiG</i> | 16.7 | 17.1 | 17.1 | 16.9 | 16.0 | 16.3 | 16.3 | 16.1 |
| <i>thiH</i> | 16.9 | 17.3 | 17.0 | 16.9 | 15.9 | 16.5 | 16.2 | 16.0 |
| <i>thiI</i> | 15.5 | 15.4 | 15.3 | 15.3 | 15.0 | 15.2 | 15.0 | 15.3 |
| <i>thiK</i> | 15.8 | 15.4 | 15.4 | 15.6 | 15.9 | 15.7 | 15.7 | 15.8 |
| <i>thiL</i> | 15.3 | 15.3 | 15.2 | 15.1 | 15.1 | 15.2 | 15.2 | 15.3 |
| <i>thiM</i> | 16.5 | 17.1 | 16.4 | 16.6 | 16.2 | 16.7 | 16.3 | 16.2 |

|               |      |      |      |      |      |      |      |      |
|---------------|------|------|------|------|------|------|------|------|
| <i>thiP</i>   | 14.7 | 14.8 | 14.6 | 14.4 | 14.3 | 14.3 | 14.2 | 14.2 |
| <i>thiQ</i>   | 14.2 | 14.2 | 14.1 | 13.8 | 13.8 | 13.8 | 13.8 | 13.7 |
| <i>thiS</i>   | 17.0 | 17.5 | 17.6 | 17.3 | 16.9 | 16.7 | 16.7 | 16.4 |
| <i>thrA</i>   | 19.0 | 19.0 | 19.0 | 19.1 | 19.1 | 19.1 | 19.2 | 19.3 |
| <i>thrB</i>   | 18.3 | 18.3 | 18.5 | 18.5 | 18.7 | 18.4 | 18.7 | 18.7 |
| <i>thrC</i>   | 18.6 | 18.4 | 18.4 | 18.7 | 18.5 | 18.6 | 18.6 | 18.8 |
| <i>thrL</i>   | 20.2 | 20.4 | 19.9 | 20.2 | 20.1 | 19.9 | 19.4 | 20.0 |
| <i>thrS</i>   | 18.3 | 18.2 | 18.2 | 18.4 | 18.5 | 18.4 | 18.4 | 18.4 |
| <i>thrT</i>   | 19.9 | 19.9 | 20.3 | 19.8 | 19.9 | 19.8 | 19.8 | 19.7 |
| <i>thrU</i>   | 20.0 | 19.9 | 20.1 | 19.7 | 19.9 | 19.4 | 19.3 | 19.8 |
| <i>thrV</i>   | 18.7 | 18.7 | 18.4 | 18.2 | 18.7 | 18.6 | 17.8 | 18.0 |
| <i>thrW</i>   | 17.5 | 17.5 | 16.7 | 16.2 | 17.7 | 17.9 | 16.4 | 16.8 |
| <i>thyA</i>   | 16.3 | 16.2 | 15.9 | 16.1 | 15.9 | 16.3 | 15.9 | 16.1 |
| <i>tig</i>    | 18.9 | 18.8 | 18.8 | 18.9 | 18.8 | 18.8 | 18.7 | 18.7 |
| <i>tilS</i>   | 14.5 | 14.6 | 14.4 | 14.3 | 14.4 | 14.4 | 14.3 | 14.1 |
| <i>tisA</i>   | 16.2 | 17.7 | 17.3 | 16.2 | 16.7 | 16.8 | 16.6 | 16.4 |
| <i>tisB</i>   | 16.5 | 17.8 | 16.8 | 17.5 | 16.3 | 17.0 | 16.4 | 16.5 |
| <i>tktA</i>   | 17.9 | 17.8 | 18.1 | 18.0 | 17.9 | 17.8 | 18.3 | 18.0 |
| <i>tktB</i>   | 16.4 | 16.5 | 16.2 | 16.4 | 15.9 | 15.8 | 15.7 | 16.0 |
| <i>tldD</i>   | 15.7 | 15.6 | 15.4 | 15.4 | 15.9 | 15.6 | 15.5 | 15.7 |
| <i>tmcA</i>   | 14.4 | 14.3 | 14.3 | 14.2 | 14.4 | 14.4 | 14.4 | 14.6 |
| <i>tmk</i>    | 15.4 | 15.4 | 15.4 | 15.4 | 15.7 | 15.5 | 15.6 | 15.5 |
| <i>tnaA</i>   | 13.3 | 13.0 | 13.3 | 13.5 | 12.9 | 13.0 | 13.0 | 12.7 |
| <i>tnaB</i>   | 12.7 | 12.6 | 12.6 | 12.8 | 12.7 | 12.6 | 12.6 | 12.6 |
| <i>tnaC</i>   | 15.8 | 15.0 | 15.0 | 14.7 | 13.8 | 15.1 | 13.5 | 14.0 |
| <i>tolA</i>   | 16.2 | 16.3 | 15.6 | 16.0 | 16.1 | 16.3 | 15.5 | 15.9 |
| <i>tolB</i>   | 17.9 | 17.9 | 18.0 | 17.8 | 18.1 | 17.8 | 18.0 | 17.9 |
| <i>tolC</i>   | 17.8 | 17.8 | 17.5 | 17.8 | 17.3 | 17.6 | 17.4 | 17.7 |
| <i>tolQ</i>   | 16.4 | 16.5 | 16.3 | 16.3 | 16.3 | 16.6 | 16.3 | 16.4 |
| <i>tolR</i>   | 16.0 | 16.2 | 15.7 | 15.8 | 16.0 | 16.0 | 15.7 | 16.0 |
| <i>tomB</i>   | 17.0 | 16.9 | 16.4 | 16.4 | 16.0 | 16.9 | 15.7 | 15.8 |
| <i>tonB</i>   | 15.7 | 17.6 | 17.6 | 15.0 | 14.2 | 17.9 | 17.9 | 14.4 |
| <i>topA</i>   | 16.6 | 16.4 | 16.4 | 16.5 | 16.4 | 16.5 | 16.2 | 16.4 |
| <i>topB</i>   | 15.2 | 15.2 | 14.9 | 15.2 | 14.9 | 15.0 | 14.9 | 14.9 |
| <i>torA</i>   | 12.8 | 12.8 | 12.8 | 13.4 | 13.1 | 12.9 | 13.0 | 12.9 |
| <i>torC</i>   | 12.9 | 13.0 | 12.7 | 13.1 | 13.1 | 13.1 | 13.0 | 12.8 |
| <i>torD</i>   | 12.9 | 12.9 | 12.8 | 12.8 | 12.9 | 13.1 | 13.0 | 13.0 |
| <i>torI</i>   | 14.9 | 15.0 | 14.3 | 14.1 | 14.8 | 15.7 | 14.1 | 14.6 |
| <i>torR</i>   | 14.2 | 14.2 | 14.0 | 13.8 | 14.0 | 14.1 | 14.0 | 14.2 |
| <i>torS</i>   | 12.9 | 12.9 | 12.8 | 13.2 | 13.6 | 13.7 | 13.5 | 13.6 |
| <i>torT</i>   | 13.0 | 13.0 | 12.9 | 13.2 | 13.8 | 14.0 | 13.7 | 13.8 |
| <i>torY</i>   | 12.8 | 12.8 | 12.7 | 13.2 | 12.9 | 12.7 | 12.8 | 12.6 |
| <i>torZ</i>   | 13.2 | 13.2 | 13.1 | 13.3 | 13.3 | 13.3 | 13.3 | 13.1 |
| <i>tp2</i>    | 12.9 | 12.9 | 12.9 | 12.9 | 13.0 | 12.9 | 12.8 | 12.8 |
| <i>tpiA</i>   | 18.5 | 18.5 | 18.1 | 18.4 | 18.9 | 18.8 | 19.0 | 19.1 |
| <i>tpke11</i> | 17.3 | 16.9 | 17.8 | 17.6 | 17.5 | 17.2 | 17.3 | 17.0 |
| <i>tpke70</i> | 12.9 | 12.9 | 12.7 | 13.4 | 12.9 | 12.9 | 12.8 | 12.8 |
| <i>tppB</i>   | 13.4 | 13.2 | 13.3 | 13.2 | 14.0 | 14.0 | 14.5 | 14.5 |
| <i>tpr</i>    | 13.8 | 13.7 | 13.9 | 13.9 | 13.8 | 13.6 | 13.6 | 13.5 |
| <i>tpx</i>    | 18.8 | 18.8 | 18.7 | 18.5 | 17.2 | 17.7 | 16.9 | 17.5 |
| <i>tqsA</i>   | 13.4 | 13.3 | 13.2 | 13.4 | 13.5 | 13.6 | 13.4 | 13.4 |
| <i>treA</i>   | 14.9 | 14.9 | 14.6 | 14.6 | 14.4 | 14.8 | 14.4 | 14.5 |
| <i>treB</i>   | 13.2 | 13.0 | 13.2 | 13.0 | 13.1 | 13.0 | 13.0 | 13.1 |
| <i>treC</i>   | 13.1 | 13.0 | 13.1 | 13.3 | 13.1 | 12.9 | 13.0 | 12.8 |
| <i>treF</i>   | 14.3 | 14.5 | 14.2 | 14.2 | 13.7 | 14.1 | 13.8 | 13.8 |
| <i>treR</i>   | 14.2 | 14.2 | 14.0 | 14.0 | 14.1 | 14.6 | 14.2 | 14.1 |
| <i>trg</i>    | 13.0 | 13.1 | 12.8 | 13.1 | 13.1 | 13.2 | 13.0 | 12.9 |
| <i>trkA</i>   | 15.3 | 15.2 | 14.8 | 15.0 | 15.0 | 15.1 | 14.8 | 15.1 |
| <i>trkG</i>   | 14.1 | 14.0 | 13.7 | 13.5 | 13.8 | 14.2 | 13.7 | 13.7 |
| <i>trkH</i>   | 15.0 | 14.8 | 14.7 | 14.4 | 14.7 | 14.9 | 14.7 | 14.8 |
| <i>trmA</i>   | 15.9 | 15.8 | 15.5 | 15.8 | 15.5 | 15.6 | 15.2 | 15.4 |

|             |      |      |      |      |      |      |      |      |
|-------------|------|------|------|------|------|------|------|------|
| <i>trmD</i> | 19.4 | 19.4 | 19.6 | 19.5 | 19.8 | 19.3 | 19.6 | 19.3 |
| <i>trmH</i> | 15.5 | 15.4 | 15.2 | 15.2 | 15.3 | 15.5 | 15.3 | 15.3 |
| <i>trmI</i> | 16.6 | 16.6 | 16.3 | 16.5 | 16.5 | 16.2 | 15.9 | 16.1 |
| <i>trmJ</i> | 15.9 | 15.9 | 15.8 | 15.7 | 15.9 | 16.1 | 15.8 | 16.0 |
| <i>trmL</i> | 14.5 | 14.4 | 14.4 | 13.9 | 14.2 | 14.4 | 14.2 | 14.3 |
| <i>trpA</i> | 17.6 | 17.7 | 17.7 | 17.5 | 17.2 | 17.1 | 17.1 | 17.5 |
| <i>trpB</i> | 17.6 | 17.6 | 17.8 | 17.7 | 17.5 | 17.1 | 17.3 | 17.5 |
| <i>trpC</i> | 17.1 | 17.1 | 17.0 | 17.3 | 16.8 | 16.6 | 16.5 | 16.9 |
| <i>trpD</i> | 16.5 | 16.5 | 16.7 | 16.5 | 16.4 | 16.1 | 16.3 | 16.5 |
| <i>trpE</i> | 17.1 | 17.1 | 17.2 | 17.0 | 16.7 | 16.7 | 16.8 | 17.1 |
| <i>trpL</i> | 17.8 | 17.7 | 17.5 | 17.2 | 17.7 | 17.6 | 17.1 | 17.5 |
| <i>trpR</i> | 15.7 | 15.8 | 15.5 | 15.4 | 15.5 | 15.7 | 15.2 | 15.6 |
| <i>trpS</i> | 17.3 | 17.2 | 16.9 | 17.1 | 16.9 | 17.2 | 17.0 | 17.2 |
| <i>trpT</i> | 15.4 | 15.8 | 16.0 | 14.9 | 15.8 | 15.6 | 15.4 | 15.6 |
| <i>truA</i> | 15.7 | 15.7 | 15.7 | 15.6 | 15.9 | 15.7 | 15.8 | 15.8 |
| <i>truB</i> | 16.0 | 15.7 | 15.7 | 16.0 | 15.8 | 15.8 | 15.8 | 15.9 |
| <i>truC</i> | 14.7 | 14.7 | 14.5 | 14.3 | 14.3 | 14.5 | 14.3 | 14.4 |
| <i>truD</i> | 16.1 | 16.0 | 15.6 | 16.0 | 15.7 | 15.8 | 15.5 | 15.8 |
| <i>trxA</i> | 18.0 | 17.6 | 17.8 | 17.6 | 17.8 | 17.8 | 17.5 | 17.8 |
| <i>trxB</i> | 17.4 | 17.5 | 17.4 | 17.3 | 16.8 | 16.7 | 16.5 | 16.5 |
| <i>trxC</i> | 15.9 | 16.1 | 15.7 | 15.6 | 13.9 | 14.4 | 13.9 | 14.1 |
| <i>tsf</i>  | 19.1 | 19.0 | 18.9 | 19.2 | 19.0 | 19.0 | 18.7 | 18.9 |
| <i>tsgA</i> | 14.5 | 14.4 | 13.9 | 14.2 | 14.3 | 14.5 | 14.3 | 14.6 |
| <i>tsr</i>  | 13.1 | 13.3 | 13.1 | 13.2 | 13.3 | 13.4 | 13.3 | 13.0 |
| <i>tsx</i>  | 17.6 | 16.8 | 17.3 | 17.6 | 16.9 | 16.7 | 17.1 | 17.0 |
| <i>ttcA</i> | 15.6 | 15.5 | 15.0 | 15.2 | 14.8 | 15.1 | 14.5 | 15.0 |
| <i>ttdA</i> | 12.7 | 12.6 | 12.6 | 12.8 | 13.0 | 12.8 | 13.1 | 12.9 |
| <i>ttdB</i> | 12.8 | 12.7 | 12.7 | 13.4 | 13.0 | 12.8 | 13.1 | 12.8 |
| <i>ttdR</i> | 13.0 | 13.0 | 12.8 | 13.1 | 13.6 | 14.0 | 13.6 | 13.6 |
| <i>ttdT</i> | 12.7 | 12.7 | 12.6 | 12.9 | 12.8 | 12.7 | 12.7 | 12.6 |
| <i>tufA</i> | 20.0 | 19.9 | 20.4 | 20.0 | 20.2 | 19.8 | 20.2 | 19.9 |
| <i>tufB</i> | 19.9 | 19.9 | 20.4 | 20.0 | 20.1 | 19.8 | 20.2 | 19.8 |
| <i>tus</i>  | 14.7 | 14.6 | 14.4 | 15.1 | 14.2 | 14.6 | 14.3 | 14.3 |
| <i>tynA</i> | 13.0 | 13.0 | 12.9 | 13.0 | 13.0 | 13.0 | 12.9 | 12.9 |
| <i>typA</i> | 17.6 | 17.6 | 17.6 | 17.7 | 17.5 | 17.5 | 17.6 | 17.7 |
| <i>tyrA</i> | 15.9 | 15.8 | 15.7 | 15.9 | 16.0 | 15.2 | 15.3 | 16.1 |
| <i>tyrB</i> | 16.7 | 16.8 | 16.7 | 16.7 | 16.4 | 16.5 | 16.5 | 16.4 |
| <i>tyrP</i> | 14.1 | 14.1 | 14.0 | 13.9 | 14.0 | 14.3 | 14.2 | 14.3 |
| <i>tyrR</i> | 15.5 | 15.5 | 15.2 | 15.4 | 15.7 | 16.0 | 15.7 | 15.8 |
| <i>tyrS</i> | 17.3 | 17.2 | 17.1 | 17.2 | 17.6 | 17.4 | 17.5 | 17.5 |
| <i>tyrT</i> | 19.2 | 19.3 | 19.0 | 18.7 | 19.2 | 19.0 | 18.5 | 18.5 |
| <i>tyrU</i> | 19.2 | 19.1 | 19.9 | 18.7 | 19.7 | 19.0 | 19.1 | 18.6 |
| <i>tyrV</i> | 19.4 | 19.4 | 19.1 | 18.6 | 19.4 | 18.9 | 18.5 | 18.1 |
| <i>ubiA</i> | 15.4 | 15.4 | 15.2 | 15.1 | 14.5 | 15.1 | 14.6 | 14.7 |
| <i>ubiB</i> | 15.3 | 15.2 | 14.8 | 15.0 | 15.0 | 15.3 | 14.9 | 15.1 |
| <i>ubiC</i> | 15.7 | 15.7 | 15.7 | 15.2 | 15.1 | 15.4 | 14.9 | 14.9 |
| <i>ubiD</i> | 16.0 | 15.9 | 15.8 | 15.6 | 15.5 | 15.8 | 15.4 | 15.4 |
| <i>ubiE</i> | 16.9 | 16.7 | 16.6 | 16.6 | 16.5 | 16.7 | 16.6 | 16.7 |
| <i>ubiF</i> | 15.3 | 15.5 | 15.1 | 15.1 | 15.4 | 15.3 | 15.1 | 15.4 |
| <i>ubiG</i> | 16.2 | 16.3 | 16.0 | 16.0 | 16.5 | 16.3 | 16.3 | 16.2 |
| <i>ubiH</i> | 15.0 | 14.9 | 15.0 | 14.9 | 15.1 | 15.1 | 15.2 | 15.0 |
| <i>ubiX</i> | 14.9 | 14.9 | 14.5 | 14.4 | 14.2 | 14.6 | 14.3 | 14.5 |
| <i>ucpA</i> | 15.1 | 15.0 | 14.9 | 14.9 | 15.2 | 15.0 | 14.9 | 14.9 |
| <i>udk</i>  | 16.1 | 16.0 | 15.5 | 15.9 | 15.9 | 16.1 | 15.8 | 16.4 |
| <i>udp</i>  | 16.6 | 16.5 | 16.4 | 16.5 | 17.0 | 16.8 | 16.9 | 17.1 |
| <i>ugd</i>  | 15.7 | 15.4 | 15.3 | 15.9 | 14.8 | 14.6 | 14.1 | 15.2 |
| <i>ugpA</i> | 13.6 | 13.7 | 13.5 | 13.3 | 12.8 | 12.8 | 12.7 | 12.6 |
| <i>ugpB</i> | 14.8 | 15.1 | 14.6 | 14.6 | 13.1 | 13.3 | 13.0 | 12.8 |
| <i>ugpC</i> | 14.4 | 14.4 | 14.1 | 13.9 | 13.8 | 13.6 | 13.6 | 13.4 |
| <i>ugpE</i> | 13.8 | 13.8 | 13.5 | 13.1 | 12.7 | 12.8 | 12.7 | 12.6 |
| <i>ugpQ</i> | 14.7 | 14.8 | 14.7 | 14.6 | 14.2 | 14.3 | 14.4 | 14.4 |

|             |      |      |      |      |      |      |      |      |
|-------------|------|------|------|------|------|------|------|------|
| <i>uhpA</i> | 15.2 | 15.1 | 15.5 | 15.2 | 15.6 | 15.3 | 15.6 | 15.8 |
| <i>uhpB</i> | 13.6 | 13.6 | 13.5 | 13.2 | 13.6 | 13.7 | 13.7 | 14.0 |
| <i>uhpC</i> | 13.3 | 13.2 | 13.3 | 13.1 | 13.0 | 13.1 | 13.0 | 13.0 |
| <i>uhpT</i> | 12.9 | 12.8 | 12.7 | 13.0 | 12.9 | 12.9 | 12.9 | 12.9 |
| <i>uidA</i> | 12.7 | 12.7 | 12.6 | 12.8 | 12.9 | 12.7 | 12.7 | 12.8 |
| <i>uidB</i> | 13.0 | 13.0 | 12.7 | 13.4 | 13.3 | 12.9 | 12.9 | 12.7 |
| <i>uidC</i> | 12.8 | 12.8 | 12.7 | 13.3 | 12.8 | 12.8 | 12.7 | 12.7 |
| <i>uidR</i> | 14.7 | 14.6 | 14.3 | 14.2 | 14.9 | 15.0 | 14.6 | 14.8 |
| <i>ulaA</i> | 12.7 | 12.7 | 12.6 | 13.2 | 12.7 | 12.7 | 12.7 | 12.5 |
| <i>ulaB</i> | 13.5 | 13.5 | 13.4 | 13.5 | 13.3 | 13.3 | 13.4 | 13.2 |
| <i>ulaC</i> | 13.1 | 13.1 | 13.1 | 13.4 | 13.2 | 13.1 | 13.3 | 13.0 |
| <i>ulaD</i> | 13.2 | 13.1 | 13.1 | 13.7 | 13.3 | 13.2 | 13.3 | 13.1 |
| <i>ulaE</i> | 13.1 | 13.1 | 13.1 | 13.6 | 13.4 | 13.2 | 13.3 | 13.0 |
| <i>ulaF</i> | 15.9 | 13.1 | 13.1 | 16.8 | 13.5 | 13.1 | 13.2 | 13.0 |
| <i>ulaG</i> | 13.3 | 13.2 | 13.2 | 13.3 | 13.3 | 13.4 | 13.3 | 13.3 |
| <i>ulaR</i> | 14.4 | 14.4 | 13.9 | 14.2 | 14.1 | 14.4 | 13.9 | 14.2 |
| <i>umuC</i> | 13.3 | 13.6 | 13.4 | 13.3 | 13.2 | 13.4 | 13.2 | 13.2 |
| <i>umuD</i> | 14.0 | 14.5 | 14.0 | 14.1 | 13.5 | 14.1 | 13.6 | 13.9 |
| <i>ung</i>  | 15.7 | 15.6 | 15.5 | 15.2 | 15.8 | 15.9 | 15.8 | 15.6 |
| <i>uof</i>  | 19.3 | 18.1 | 17.6 | 19.1 | 18.6 | 17.8 | 16.9 | 18.4 |
| <i>upp</i>  | 18.1 | 18.2 | 18.2 | 18.0 | 18.8 | 17.9 | 18.4 | 18.4 |
| <i>uraA</i> | 17.5 | 17.3 | 17.2 | 17.5 | 17.2 | 16.6 | 17.1 | 17.2 |
| <i>usg</i>  | 15.8 | 15.8 | 15.8 | 15.7 | 15.9 | 15.7 | 15.9 | 16.1 |
| <i>ushA</i> | 16.1 | 16.0 | 15.9 | 16.0 | 16.2 | 16.0 | 15.8 | 16.0 |
| <i>uspA</i> | 19.4 | 19.4 | 19.4 | 19.5 | 19.3 | 19.5 | 19.5 | 19.6 |
| <i>uspB</i> | 16.0 | 16.2 | 15.5 | 16.4 | 15.8 | 15.8 | 15.4 | 16.2 |
| <i>uspC</i> | 14.8 | 14.9 | 14.4 | 14.4 | 14.8 | 15.2 | 14.6 | 15.0 |
| <i>uspD</i> | 17.0 | 17.2 | 16.4 | 16.9 | 17.1 | 17.7 | 17.1 | 17.5 |
| <i>uspE</i> | 17.0 | 17.3 | 16.7 | 16.9 | 17.5 | 17.8 | 17.5 | 17.7 |
| <i>uspF</i> | 16.4 | 16.2 | 16.2 | 16.0 | 17.0 | 17.3 | 16.7 | 17.1 |
| <i>uspG</i> | 16.4 | 16.2 | 16.2 | 16.1 | 16.9 | 17.1 | 17.0 | 17.3 |
| <i>uup</i>  | 15.6 | 15.5 | 15.1 | 15.5 | 15.2 | 15.3 | 15.0 | 15.3 |
| <i>uvrA</i> | 14.7 | 14.9 | 14.9 | 14.7 | 14.7 | 14.9 | 14.9 | 14.8 |
| <i>uvrB</i> | 15.1 | 15.3 | 15.0 | 15.0 | 15.1 | 15.2 | 15.1 | 15.2 |
| <i>uvrC</i> | 15.5 | 15.6 | 15.0 | 15.2 | 15.4 | 15.9 | 15.3 | 15.6 |
| <i>uvrD</i> | 14.4 | 14.5 | 14.5 | 14.1 | 14.5 | 14.5 | 14.6 | 14.4 |
| <i>uvrY</i> | 16.7 | 16.7 | 16.2 | 16.6 | 16.9 | 17.1 | 16.5 | 16.8 |
| <i>uxaA</i> | 13.4 | 13.3 | 13.2 | 13.5 | 13.3 | 13.3 | 13.4 | 13.2 |
| <i>uxaB</i> | 12.9 | 13.0 | 12.8 | 13.1 | 13.1 | 13.3 | 13.1 | 13.1 |
| <i>uxaC</i> | 13.8 | 13.6 | 13.6 | 13.6 | 13.5 | 13.8 | 13.7 | 13.6 |
| <i>uxuA</i> | 14.0 | 13.6 | 13.6 | 13.8 | 13.4 | 13.4 | 13.4 | 13.3 |
| <i>uxuB</i> | 13.5 | 13.3 | 13.3 | 13.6 | 13.2 | 13.1 | 13.3 | 13.1 |
| <i>uxuR</i> | 14.8 | 14.9 | 14.6 | 14.4 | 14.5 | 14.8 | 14.5 | 14.7 |
| <i>valS</i> | 17.1 | 16.9 | 17.0 | 17.2 | 16.9 | 17.0 | 17.1 | 17.1 |
| <i>valT</i> | 20.4 | 20.4 | 20.6 | 20.2 | 20.5 | 20.3 | 20.4 | 20.3 |
| <i>valU</i> | 19.6 | 19.5 | 19.8 | 19.1 | 19.8 | 19.4 | 19.4 | 19.8 |
| <i>valV</i> | 16.8 | 16.5 | 16.7 | 15.9 | 16.8 | 16.5 | 15.8 | 16.5 |
| <i>valW</i> | 16.1 | 15.7 | 16.0 | 14.9 | 15.8 | 16.0 | 15.3 | 15.7 |
| <i>valX</i> | 20.8 | 20.8 | 20.5 | 20.6 | 20.8 | 20.8 | 20.5 | 20.8 |
| <i>valY</i> | 20.0 | 19.9 | 20.4 | 19.4 | 20.2 | 20.0 | 20.1 | 20.1 |
| <i>valZ</i> | 20.2 | 20.2 | 20.2 | 19.8 | 20.3 | 20.3 | 20.2 | 20.0 |
| <i>ves</i>  | 13.0 | 13.1 | 12.9 | 13.2 | 13.2 | 13.1 | 13.1 | 13.0 |
| <i>viaA</i> | 14.1 | 14.1 | 13.8 | 13.8 | 14.8 | 14.8 | 14.8 | 15.0 |
| <i>visC</i> | 15.3 | 15.3 | 15.0 | 15.2 | 15.2 | 15.3 | 15.1 | 15.1 |
| <i>vsr</i>  | 13.8 | 13.9 | 13.6 | 13.6 | 13.9 | 14.0 | 13.8 | 13.7 |
| <i>waaA</i> | 15.4 | 15.2 | 15.3 | 15.1 | 14.7 | 14.8 | 14.6 | 14.8 |
| <i>waaB</i> | 15.0 | 14.9 | 14.3 | 14.7 | 14.6 | 15.0 | 14.2 | 14.5 |
| <i>waaC</i> | 15.5 | 15.4 | 15.2 | 15.5 | 15.5 | 15.2 | 15.2 | 15.2 |
| <i>waaF</i> | 15.9 | 15.8 | 15.7 | 15.9 | 15.9 | 15.9 | 15.9 | 16.0 |
| <i>waaG</i> | 15.6 | 15.6 | 15.0 | 15.5 | 15.3 | 15.8 | 15.2 | 15.3 |
| <i>waaI</i> | 15.1 | 15.0 | 14.6 | 14.9 | 14.8 | 15.1 | 14.4 | 14.7 |



|               |      |      |      |      |      |      |      |      |
|---------------|------|------|------|------|------|------|------|------|
| <i>waaJ</i>   | 14.9 | 14.6 | 14.5 | 14.8 | 14.5 | 14.7 | 14.2 | 14.3 |
| <i>waaK</i>   | 14.6 | 14.3 | 14.3 | 14.1 | 14.3 | 14.5 | 14.0 | 13.9 |
| <i>waaP</i>   | 15.4 | 15.3 | 14.8 | 15.2 | 15.1 | 15.5 | 14.7 | 14.9 |
| <i>waaQ</i>   | 15.5 | 15.5 | 14.9 | 15.4 | 15.5 | 15.6 | 15.1 | 15.3 |
| <i>waaY</i>   | 15.3 | 15.1 | 14.6 | 15.4 | 14.7 | 15.0 | 14.4 | 14.5 |
| <i>wbbI</i>   | 17.1 | 16.8 | 16.6 | 17.1 | 17.0 | 16.7 | 16.6 | 16.5 |
| <i>wbbJ</i>   | 17.7 | 17.4 | 17.1 | 17.7 | 17.4 | 17.4 | 17.2 | 17.3 |
| <i>wbbK</i>   | 16.4 | 16.0 | 15.8 | 16.3 | 16.3 | 16.0 | 15.8 | 15.7 |
| <i>wbbL_1</i> | 17.8 | 17.8 | 17.1 | 17.8 | 17.8 | 17.6 | 17.4 | 17.4 |
| <i>wbbL_2</i> | 16.6 | 16.4 | 16.1 | 16.6 | 16.4 | 16.8 | 16.2 | 16.4 |
| <i>wcaA</i>   | 12.8 | 12.8 | 12.7 | 13.1 | 13.1 | 12.7 | 12.8 | 12.7 |
| <i>wcaB</i>   | 13.0 | 13.0 | 12.9 | 13.3 | 13.3 | 12.9 | 13.2 | 12.8 |
| <i>wcaC</i>   | 12.8 | 12.8 | 12.7 | 13.3 | 12.8 | 12.7 | 12.8 | 12.6 |
| <i>wcaD</i>   | 12.7 | 12.8 | 12.8 | 13.2 | 13.0 | 12.7 | 12.7 | 12.6 |
| <i>wcaE</i>   | 12.7 | 12.8 | 12.6 | 13.2 | 12.7 | 12.7 | 12.6 | 12.7 |
| <i>wcaF</i>   | 12.8 | 12.9 | 12.6 | 13.4 | 12.9 | 12.7 | 12.7 | 12.5 |
| <i>wcaI</i>   | 12.7 | 12.8 | 12.7 | 13.1 | 13.0 | 12.7 | 12.8 | 12.8 |
| <i>wcaJ</i>   | 12.7 | 12.8 | 12.7 | 13.0 | 12.8 | 12.8 | 12.7 | 12.5 |
| <i>wcaK</i>   | 12.9 | 13.0 | 12.8 | 13.1 | 12.8 | 12.8 | 12.8 | 12.9 |
| <i>wcaL</i>   | 13.1 | 13.1 | 12.9 | 13.5 | 13.2 | 13.2 | 13.1 | 12.9 |
| <i>wcaM</i>   | 13.6 | 13.4 | 13.2 | 13.3 | 13.3 | 13.5 | 13.2 | 13.2 |
| <i>wecH</i>   | 13.5 | 13.4 | 13.2 | 13.1 | 13.3 | 13.5 | 13.2 | 13.2 |
| <i>wrbA</i>   | 18.0 | 17.9 | 17.8 | 17.7 | 18.5 | 18.4 | 18.4 | 18.6 |
| <i>wza</i>    | 12.7 | 12.7 | 12.6 | 12.8 | 12.7 | 12.7 | 12.7 | 12.5 |
| <i>wzb</i>    | 13.0 | 13.1 | 12.7 | 14.1 | 13.1 | 12.9 | 13.0 | 12.8 |
| <i>wzc</i>    | 12.7 | 12.8 | 12.6 | 13.2 | 12.8 | 12.7 | 12.7 | 12.6 |
| <i>wzcC</i>   | 12.8 | 12.8 | 12.7 | 13.7 | 12.9 | 12.8 | 12.8 | 12.7 |
| <i>wzcE</i>   | 14.4 | 14.2 | 14.1 | 14.1 | 14.3 | 14.3 | 14.2 | 14.3 |
| <i>wzyE</i>   | 14.4 | 14.3 | 14.0 | 13.7 | 14.0 | 14.3 | 13.8 | 14.0 |
| <i>wzzE</i>   | 15.4 | 15.3 | 15.2 | 15.1 | 15.5 | 15.5 | 15.4 | 15.5 |
| <i>xanP</i>   | 16.1 | 16.1 | 16.1 | 15.7 | 15.9 | 15.8 | 15.6 | 16.1 |
| <i>xanQ</i>   | 13.0 | 12.9 | 12.8 | 13.2 | 12.9 | 13.0 | 12.8 | 12.9 |
| <i>xapA</i>   | 12.9 | 13.0 | 12.8 | 13.2 | 13.0 | 12.9 | 12.9 | 12.7 |
| <i>xapB</i>   | 13.0 | 13.0 | 12.8 | 13.3 | 13.0 | 13.1 | 12.9 | 13.0 |
| <i>xapR</i>   | 13.6 | 13.7 | 13.4 | 13.5 | 13.7 | 13.9 | 13.6 | 13.5 |
| <i>xdhA</i>   | 13.2 | 13.2 | 13.1 | 13.2 | 13.1 | 13.1 | 13.1 | 13.0 |
| <i>xdhB</i>   | 13.2 | 13.2 | 13.1 | 13.1 | 13.0 | 13.1 | 13.1 | 13.1 |
| <i>xdhC</i>   | 13.3 | 13.3 | 13.2 | 13.5 | 13.3 | 13.5 | 13.3 | 13.2 |
| <i>xdhD</i>   | 13.0 | 13.0 | 12.9 | 12.9 | 12.9 | 13.0 | 12.9 | 12.9 |
| <i>xerC</i>   | 15.7 | 15.6 | 15.5 | 15.6 | 15.7 | 15.7 | 15.8 | 15.7 |
| <i>xerD</i>   | 15.7 | 15.5 | 15.2 | 15.5 | 15.7 | 15.7 | 15.3 | 15.5 |
| <i>xisE</i>   | 13.7 | 14.3 | 13.7 | 13.2 | 13.5 | 14.0 | 13.4 | 13.2 |
| <i>xseA</i>   | 15.8 | 16.0 | 15.5 | 15.5 | 15.7 | 16.3 | 15.8 | 15.9 |
| <i>xseB</i>   | 16.6 | 16.5 | 16.7 | 16.5 | 16.8 | 16.5 | 16.7 | 16.3 |
| <i>xthA</i>   | 16.2 | 16.1 | 15.9 | 15.9 | 15.4 | 15.7 | 15.4 | 15.6 |
| <i>xylA</i>   | 13.6 | 13.6 | 13.3 | 13.4 | 13.4 | 13.5 | 13.3 | 13.4 |
| <i>xylB</i>   | 13.7 | 13.7 | 13.5 | 13.5 | 13.8 | 13.6 | 13.6 | 13.5 |
| <i>xylE</i>   | 12.7 | 12.8 | 12.7 | 13.0 | 12.9 | 12.7 | 12.7 | 12.7 |
| <i>xylF</i>   | 12.9 | 12.8 | 12.9 | 13.0 | 12.8 | 12.9 | 12.7 | 12.9 |
| <i>xylG</i>   | 12.9 | 13.0 | 12.8 | 13.1 | 12.8 | 13.0 | 12.7 | 12.7 |
| <i>xylH</i>   | 13.2 | 13.1 | 13.1 | 13.2 | 13.1 | 13.2 | 13.0 | 12.9 |
| <i>xylR</i>   | 14.3 | 14.3 | 14.0 | 13.9 | 14.1 | 14.5 | 14.0 | 14.1 |
| <i>yaaA</i>   | 15.3 | 15.4 | 14.9 | 15.1 | 14.3 | 15.1 | 14.5 | 14.8 |
| <i>yaaH</i>   | 13.8 | 13.5 | 13.6 | 13.2 | 14.2 | 14.1 | 14.0 | 14.4 |
| <i>yaaI</i>   | 12.9 | 12.9 | 12.7 | 13.1 | 13.0 | 12.9 | 12.8 | 12.6 |
| <i>yaaJ</i>   | 13.3 | 13.2 | 13.2 | 13.2 | 13.5 | 13.7 | 13.6 | 13.7 |
| <i>yaaU</i>   | 12.9 | 12.9 | 12.8 | 13.0 | 13.1 | 12.9 | 13.0 | 12.7 |
| <i>yaaW</i>   | 13.2 | 13.3 | 12.9 | 13.1 | 13.0 | 13.2 | 12.9 | 13.0 |
| <i>yaaX</i>   | 15.5 | 15.2 | 15.1 | 15.3 | 15.1 | 15.5 | 15.3 | 15.3 |
| <i>yaaY</i>   | 14.2 | 14.1 | 13.9 | 13.8 | 14.2 | 13.8 | 13.9 | 14.3 |
| <i>yabI</i>   | 14.1 | 14.2 | 14.0 | 14.2 | 13.7 | 13.8 | 13.7 | 13.8 |

|             |      |      |      |      |      |      |      |      |
|-------------|------|------|------|------|------|------|------|------|
| <i>yabP</i> | 15.4 | 15.3 | 15.2 | 14.9 | 15.9 | 15.7 | 15.2 | 14.7 |
| <i>yabQ</i> | 16.6 | 16.3 | 16.0 | 15.8 | 16.7 | 16.8 | 15.7 | 15.2 |
| <i>yacC</i> | 15.6 | 15.5 | 15.0 | 14.6 | 15.4 | 16.0 | 15.2 | 15.6 |
| <i>yacF</i> | 16.2 | 16.1 | 15.9 | 15.8 | 15.7 | 16.3 | 15.9 | 16.1 |
| <i>yacG</i> | 16.4 | 16.4 | 15.9 | 16.2 | 15.8 | 16.4 | 15.8 | 16.3 |
| <i>yacH</i> | 12.7 | 12.8 | 12.6 | 12.9 | 12.7 | 12.7 | 12.6 | 12.5 |
| <i>yacL</i> | 15.6 | 15.5 | 15.1 | 15.2 | 15.3 | 15.1 | 14.5 | 15.0 |
| <i>yadB</i> | 14.1 | 14.0 | 13.8 | 13.6 | 13.7 | 13.9 | 13.7 | 13.7 |
| <i>yadC</i> | 12.8 | 12.8 | 12.6 | 12.8 | 12.8 | 12.9 | 12.6 | 12.7 |
| <i>yadD</i> | 13.8 | 13.7 | 13.4 | 13.6 | 13.9 | 13.8 | 13.4 | 13.5 |
| <i>yadE</i> | 13.4 | 13.6 | 13.3 | 13.1 | 13.3 | 13.6 | 13.4 | 13.3 |
| <i>yadG</i> | 15.6 | 15.6 | 15.3 | 15.5 | 15.7 | 15.7 | 15.5 | 15.6 |
| <i>yadH</i> | 15.2 | 15.2 | 14.9 | 15.1 | 15.0 | 15.3 | 15.2 | 15.4 |
| <i>yadI</i> | 13.8 | 13.7 | 13.6 | 13.4 | 14.0 | 14.1 | 13.9 | 14.1 |
| <i>yadK</i> | 12.7 | 12.8 | 12.6 | 12.8 | 12.8 | 12.9 | 12.6 | 12.7 |
| <i>yadL</i> | 13.2 | 13.1 | 13.0 | 12.9 | 13.1 | 13.2 | 13.0 | 13.0 |
| <i>yadM</i> | 13.1 | 13.1 | 13.0 | 13.4 | 13.1 | 13.2 | 13.0 | 12.8 |
| <i>yadN</i> | 12.6 | 12.7 | 12.5 | 12.7 | 12.6 | 12.6 | 12.5 | 12.6 |
| <i>yadS</i> | 13.9 | 13.9 | 13.8 | 13.4 | 13.8 | 13.7 | 13.6 | 13.8 |
| <i>yaeB</i> | 15.0 | 15.1 | 14.7 | 14.6 | 14.4 | 15.2 | 14.7 | 15.1 |
| <i>yaeF</i> | 13.1 | 13.0 | 12.9 | 13.2 | 13.0 | 13.2 | 13.0 | 13.0 |
| <i>yaeH</i> | 16.7 | 16.7 | 16.2 | 16.3 | 16.4 | 16.7 | 15.9 | 16.4 |
| <i>yaeI</i> | 13.9 | 13.7 | 13.6 | 13.4 | 13.5 | 13.8 | 13.6 | 13.5 |
| <i>yaeJ</i> | 15.3 | 15.3 | 14.8 | 15.1 | 15.3 | 15.4 | 14.9 | 15.3 |
| <i>yaeP</i> | 16.6 | 16.7 | 16.3 | 16.3 | 16.5 | 16.8 | 16.3 | 16.7 |
| <i>yaeQ</i> | 15.4 | 15.3 | 14.9 | 15.0 | 15.3 | 15.5 | 15.1 | 15.4 |
| <i>yaeR</i> | 15.1 | 15.0 | 14.6 | 14.9 | 14.5 | 14.9 | 14.4 | 14.7 |
| <i>yafC</i> | 14.6 | 14.6 | 14.2 | 14.1 | 14.4 | 14.7 | 14.3 | 14.4 |
| <i>yafD</i> | 15.7 | 15.9 | 15.6 | 15.4 | 16.0 | 16.2 | 16.1 | 16.2 |
| <i>yafE</i> | 14.1 | 14.2 | 13.6 | 13.8 | 14.4 | 14.6 | 14.2 | 14.5 |
| <i>yafF</i> | 13.6 | 13.4 | 13.3 | 13.3 | 13.6 | 13.6 | 13.3 | 13.0 |
| <i>yafJ</i> | 15.6 | 15.6 | 15.7 | 15.5 | 15.7 | 15.9 | 15.9 | 15.7 |
| <i>yafK</i> | 16.8 | 16.9 | 16.4 | 16.6 | 17.0 | 17.3 | 16.8 | 16.9 |
| <i>yafL</i> | 13.1 | 13.1 | 13.1 | 12.8 | 13.2 | 13.1 | 13.0 | 12.9 |
| <i>yafM</i> | 14.4 | 14.3 | 14.0 | 14.1 | 14.1 | 14.4 | 13.8 | 14.0 |
| <i>yafN</i> | 14.9 | 14.9 | 14.5 | 14.4 | 14.6 | 15.0 | 14.3 | 14.6 |
| <i>yafO</i> | 14.4 | 14.4 | 14.0 | 14.5 | 14.0 | 14.5 | 13.8 | 14.0 |
| <i>yafP</i> | 13.9 | 13.9 | 13.5 | 13.3 | 14.8 | 14.0 | 13.4 | 13.5 |
| <i>yafQ</i> | 15.5 | 15.5 | 15.2 | 15.3 | 15.5 | 15.7 | 15.0 | 14.9 |
| <i>yafS</i> | 14.4 | 14.4 | 14.0 | 14.1 | 14.0 | 14.6 | 14.1 | 14.3 |
| <i>yafT</i> | 13.1 | 13.0 | 12.8 | 13.1 | 12.9 | 13.0 | 12.8 | 12.8 |
| <i>yafU</i> | 12.8 | 12.9 | 12.7 | 13.0 | 12.9 | 12.9 | 12.6 | 12.6 |
| <i>yafV</i> | 14.3 | 14.2 | 14.0 | 14.2 | 14.4 | 14.5 | 14.3 | 14.3 |
| <i>yafW</i> | 12.9 | 12.7 | 12.5 | 13.2 | 12.7 | 12.8 | 12.7 | 12.5 |
| <i>yafX</i> | 12.9 | 12.9 | 12.7 | 13.4 | 12.9 | 12.8 | 12.8 | 12.8 |
| <i>yafY</i> | 13.6 | 13.7 | 13.6 | 13.6 | 13.5 | 13.6 | 13.5 | 13.4 |
| <i>yafZ</i> | 12.8 | 12.9 | 12.7 | 13.5 | 12.9 | 12.8 | 12.9 | 12.6 |
| <i>yagA</i> | 12.8 | 12.9 | 12.8 | 13.0 | 13.0 | 12.7 | 12.9 | 12.6 |
| <i>yagB</i> | 15.1 | 15.0 | 14.7 | 14.2 | 15.4 | 15.2 | 15.0 | 14.9 |
| <i>yagE</i> | 13.0 | 12.9 | 13.0 | 13.0 | 12.7 | 12.8 | 12.9 | 12.7 |
| <i>yagF</i> | 12.8 | 12.7 | 12.8 | 13.0 | 12.8 | 12.7 | 12.9 | 12.6 |
| <i>yagG</i> | 12.9 | 12.9 | 13.0 | 13.1 | 12.9 | 12.9 | 13.0 | 12.6 |
| <i>yagH</i> | 12.9 | 13.0 | 13.1 | 13.1 | 12.9 | 12.8 | 13.1 | 12.7 |
| <i>yagI</i> | 14.5 | 14.5 | 14.7 | 14.2 | 14.6 | 14.5 | 14.7 | 14.7 |
| <i>yagJ</i> | 13.5 | 13.5 | 13.2 | 13.4 | 13.6 | 13.5 | 13.3 | 13.4 |
| <i>yagK</i> | 13.2 | 13.2 | 13.1 | 13.2 | 13.2 | 13.4 | 13.0 | 13.0 |
| <i>yagL</i> | 13.1 | 13.1 | 12.8 | 13.2 | 13.1 | 13.2 | 12.8 | 12.9 |
| <i>yagM</i> | 12.6 | 12.6 | 12.5 | 13.3 | 12.7 | 12.6 | 12.6 | 12.6 |
| <i>yagN</i> | 17.6 | 17.8 | 16.8 | 17.3 | 17.3 | 17.9 | 16.8 | 17.2 |
| <i>yagP</i> | 13.0 | 13.1 | 13.0 | 12.8 | 13.0 | 13.2 | 13.0 | 13.0 |
| <i>yagQ</i> | 12.8 | 12.9 | 12.8 | 12.9 | 12.9 | 12.9 | 12.9 | 12.7 |

|             |      |      |      |      |      |      |      |      |
|-------------|------|------|------|------|------|------|------|------|
| <i>yagR</i> | 13.0 | 13.0 | 13.0 | 13.2 | 13.1 | 12.9 | 13.1 | 12.8 |
| <i>yagS</i> | 12.9 | 12.8 | 12.9 | 13.2 | 12.9 | 12.8 | 12.9 | 12.8 |
| <i>yagT</i> | 13.1 | 13.0 | 13.0 | 13.0 | 13.1 | 13.1 | 13.0 | 13.0 |
| <i>yagU</i> | 18.4 | 18.7 | 17.9 | 18.2 | 19.5 | 19.6 | 19.6 | 19.5 |
| <i>yagV</i> | 13.4 | 13.3 | 13.3 | 13.3 | 13.4 | 13.5 | 13.4 | 13.3 |
| <i>yagW</i> | 13.4 | 13.4 | 13.2 | 13.2 | 13.3 | 13.4 | 13.3 | 13.1 |
| <i>yagX</i> | 12.8 | 12.9 | 12.7 | 13.0 | 12.9 | 12.9 | 12.9 | 12.7 |
| <i>yahA</i> | 15.0 | 15.0 | 14.7 | 14.9 | 14.0 | 13.9 | 13.6 | 13.9 |
| <i>yahB</i> | 13.7 | 13.6 | 13.4 | 13.2 | 13.4 | 13.7 | 13.3 | 13.4 |
| <i>yahC</i> | 12.9 | 12.9 | 12.9 | 13.2 | 13.1 | 12.9 | 13.0 | 12.8 |
| <i>yahD</i> | 13.4 | 13.4 | 13.1 | 13.2 | 13.8 | 13.7 | 13.6 | 13.5 |
| <i>yahE</i> | 12.7 | 12.8 | 12.6 | 12.8 | 12.8 | 12.8 | 12.7 | 12.7 |
| <i>yahF</i> | 12.9 | 12.9 | 12.7 | 13.2 | 13.1 | 12.9 | 13.0 | 12.7 |
| <i>yahG</i> | 12.9 | 12.9 | 13.0 | 13.1 | 13.6 | 12.9 | 13.3 | 12.8 |
| <i>yahH</i> | 13.5 | 13.7 | 13.7 | 13.8 | 13.2 | 13.6 | 13.5 | 13.0 |
| <i>yahI</i> | 13.0 | 12.9 | 12.9 | 13.4 | 13.0 | 13.0 | 13.0 | 12.7 |
| <i>yahJ</i> | 14.1 | 14.0 | 14.0 | 13.8 | 13.8 | 14.1 | 14.1 | 14.0 |
| <i>yahK</i> | 16.3 | 16.4 | 15.9 | 16.3 | 16.1 | 15.9 | 15.6 | 16.2 |
| <i>yahL</i> | 12.6 | 12.7 | 12.4 | 12.7 | 12.6 | 12.6 | 12.4 | 12.6 |
| <i>yahM</i> | 13.4 | 13.3 | 13.2 | 13.3 | 13.9 | 13.9 | 13.5 | 13.7 |
| <i>yahN</i> | 13.0 | 13.0 | 13.0 | 13.2 | 13.0 | 13.0 | 13.0 | 12.9 |
| <i>yahO</i> | 17.8 | 17.9 | 17.0 | 17.4 | 17.4 | 17.6 | 16.2 | 17.1 |
| <i>yaiA</i> | 16.7 | 16.6 | 16.2 | 16.3 | 16.4 | 16.7 | 16.0 | 16.3 |
| <i>yaiE</i> | 17.2 | 17.2 | 17.0 | 16.8 | 16.8 | 17.2 | 16.5 | 17.0 |
| <i>yaiF</i> | 14.4 | 14.7 | 14.5 | 13.8 | 14.7 | 15.7 | 15.6 | 14.7 |
| <i>yaiI</i> | 14.5 | 14.5 | 14.4 | 14.2 | 14.7 | 14.6 | 14.6 | 14.6 |
| <i>yaiL</i> | 15.9 | 15.7 | 15.3 | 15.6 | 15.7 | 16.1 | 15.3 | 15.8 |
| <i>yaiO</i> | 12.9 | 13.0 | 12.8 | 12.8 | 13.0 | 13.1 | 12.9 | 12.9 |
| <i>yaiP</i> | 12.9 | 13.0 | 12.9 | 12.8 | 12.9 | 13.1 | 12.9 | 12.8 |
| <i>yaiS</i> | 12.8 | 12.8 | 12.6 | 12.9 | 12.8 | 12.8 | 12.6 | 13.2 |
| <i>yaiT</i> | 12.8 | 12.9 | 12.8 | 13.2 | 13.1 | 13.1 | 12.9 | 13.0 |
| <i>yaiU</i> | 12.9 | 13.1 | 12.9 | 12.8 | 13.1 | 13.2 | 13.0 | 13.0 |
| <i>yaiV</i> | 12.7 | 12.6 | 12.5 | 13.1 | 12.8 | 12.7 | 12.6 | 12.7 |
| <i>yaiW</i> | 14.4 | 14.5 | 14.3 | 14.2 | 14.4 | 14.6 | 14.3 | 14.3 |
| <i>yaiX</i> | 12.6 | 12.7 | 12.6 | 12.9 | 12.7 | 12.8 | 12.7 | 12.8 |
| <i>yaiY</i> | 13.0 | 12.9 | 12.8 | 12.7 | 13.0 | 12.9 | 12.9 | 13.1 |
| <i>yaiZ</i> | 14.5 | 14.4 | 14.6 | 13.9 | 14.2 | 14.4 | 14.1 | 14.1 |
| <i>yajC</i> | 19.0 | 18.6 | 18.6 | 18.8 | 18.7 | 18.9 | 18.8 | 18.9 |
| <i>yajD</i> | 16.0 | 15.9 | 16.0 | 15.5 | 16.2 | 16.4 | 15.9 | 16.1 |
| <i>yajG</i> | 18.0 | 17.9 | 17.8 | 17.7 | 17.1 | 17.9 | 17.4 | 17.5 |
| <i>yajI</i> | 13.6 | 13.4 | 13.2 | 13.1 | 13.3 | 13.6 | 13.3 | 13.4 |
| <i>yajL</i> | 15.0 | 15.0 | 14.8 | 14.8 | 14.8 | 15.1 | 14.9 | 15.0 |
| <i>yajO</i> | 15.5 | 15.5 | 15.1 | 15.4 | 15.3 | 15.2 | 14.9 | 15.3 |
| <i>yajQ</i> | 17.5 | 17.5 | 16.9 | 17.2 | 17.4 | 17.5 | 16.9 | 17.7 |
| <i>yajR</i> | 13.9 | 13.9 | 13.7 | 13.7 | 13.5 | 13.6 | 13.5 | 13.6 |
| <i>ybaA</i> | 13.5 | 13.7 | 13.2 | 13.6 | 13.8 | 13.6 | 13.3 | 13.4 |
| <i>ybaB</i> | 17.9 | 17.8 | 17.7 | 17.6 | 17.8 | 17.8 | 17.5 | 17.5 |
| <i>ybaE</i> | 13.0 | 13.0 | 13.1 | 13.0 | 13.0 | 13.2 | 13.1 | 13.2 |
| <i>ybaK</i> | 15.6 | 15.6 | 15.2 | 15.0 | 15.2 | 15.5 | 15.1 | 15.4 |
| <i>ybaL</i> | 15.0 | 14.9 | 14.9 | 14.8 | 14.7 | 14.6 | 14.3 | 14.4 |
| <i>ybaM</i> | 15.5 | 15.2 | 15.0 | 15.1 | 15.2 | 15.3 | 14.9 | 15.3 |
| <i>ybaN</i> | 15.4 | 17.0 | 16.5 | 14.9 | 14.4 | 17.0 | 16.5 | 14.4 |
| <i>ybaO</i> | 14.4 | 14.5 | 14.2 | 13.8 | 14.0 | 14.3 | 13.9 | 14.1 |
| <i>ybaP</i> | 14.5 | 14.6 | 14.3 | 14.2 | 14.3 | 14.6 | 14.3 | 14.3 |
| <i>ybaQ</i> | 16.8 | 16.9 | 16.1 | 16.7 | 16.2 | 16.7 | 15.6 | 16.5 |
| <i>ybaS</i> | 16.0 | 15.8 | 15.6 | 16.0 | 17.5 | 16.5 | 17.1 | 17.6 |
| <i>ybaT</i> | 14.9 | 14.7 | 14.4 | 14.7 | 16.0 | 15.4 | 15.7 | 16.7 |
| <i>ybaV</i> | 13.4 | 13.3 | 13.3 | 12.8 | 13.3 | 13.3 | 13.3 | 13.1 |
| <i>ybaY</i> | 16.2 | 16.1 | 15.6 | 15.9 | 14.2 | 14.4 | 13.8 | 14.6 |
| <i>ybbA</i> | 13.9 | 13.9 | 14.0 | 13.7 | 14.2 | 14.0 | 14.2 | 14.1 |
| <i>ybbB</i> | 13.9 | 13.9 | 13.7 | 14.1 | 14.2 | 14.3 | 14.2 | 14.2 |

|               |      |      |      |      |      |      |      |      |
|---------------|------|------|------|------|------|------|------|------|
| <i>ybbC</i>   | 13.8 | 13.8 | 13.6 | 13.7 | 14.5 | 14.3 | 13.8 | 13.6 |
| <i>ybbD</i>   | 12.9 | 12.9 | 12.8 | 13.1 | 12.9 | 13.1 | 12.7 | 12.8 |
| <i>ybbJ</i>   | 14.0 | 14.0 | 14.0 | 14.1 | 14.1 | 14.1 | 14.2 | 14.1 |
| <i>ybbL</i>   | 15.4 | 15.3 | 14.7 | 15.2 | 15.3 | 15.6 | 15.0 | 15.3 |
| <i>ybbM</i>   | 14.4 | 14.3 | 14.0 | 14.4 | 14.5 | 14.4 | 14.3 | 14.5 |
| <i>ybbN</i>   | 16.3 | 16.4 | 16.3 | 16.2 | 16.2 | 16.3 | 16.2 | 16.3 |
| <i>ybbO</i>   | 15.1 | 15.2 | 15.2 | 14.9 | 15.2 | 15.6 | 15.4 | 15.2 |
| <i>ybbP</i>   | 13.4 | 13.4 | 13.4 | 13.6 | 13.6 | 13.4 | 13.6 | 13.4 |
| <i>ybbV</i>   | 12.8 | 12.9 | 12.7 | 13.0 | 12.9 | 12.9 | 14.1 | 13.0 |
| <i>ybbW</i>   | 12.6 | 12.6 | 12.6 | 13.3 | 12.8 | 12.6 | 13.0 | 12.7 |
| <i>ybbY</i>   | 12.9 | 12.8 | 12.7 | 12.7 | 12.7 | 12.7 | 12.7 | 12.7 |
| <i>ybcC</i>   | 13.2 | 13.3 | 13.0 | 13.0 | 13.2 | 13.2 | 13.1 | 13.0 |
| <i>ybcD</i>   | 12.8 | 12.9 | 12.7 | 13.4 | 13.0 | 12.8 | 12.9 | 12.8 |
| <i>ybcF</i>   | 12.9 | 12.9 | 12.8 | 13.4 | 13.1 | 12.8 | 13.0 | 12.7 |
| <i>ybcH</i>   | 13.6 | 13.6 | 13.3 | 13.1 | 13.4 | 13.9 | 13.4 | 13.5 |
| <i>ybcI</i>   | 13.1 | 13.0 | 13.1 | 13.2 | 13.1 | 13.1 | 13.1 | 13.0 |
| <i>ybcJ</i>   | 16.2 | 16.2 | 15.3 | 16.0 | 15.7 | 16.2 | 15.4 | 15.6 |
| <i>ybcK</i>   | 12.7 | 12.7 | 12.5 | 13.1 | 12.7 | 12.7 | 12.5 | 12.7 |
| <i>ybcL</i>   | 13.9 | 13.9 | 13.4 | 13.6 | 13.6 | 13.8 | 13.3 | 13.4 |
| <i>ybcM</i>   | 14.1 | 14.2 | 13.8 | 14.7 | 14.2 | 14.6 | 13.9 | 13.9 |
| <i>ybcN</i>   | 12.6 | 12.7 | 12.6 | 12.8 | 12.8 | 12.7 | 12.6 | 12.6 |
| <i>ybcO</i>   | 12.7 | 12.6 | 12.7 | 13.0 | 12.8 | 12.7 | 12.7 | 12.5 |
| <i>ybcQ</i>   | 13.2 | 13.2 | 13.1 | 13.3 | 13.2 | 13.4 | 13.1 | 13.0 |
| <i>ybcS</i>   | 13.3 | 13.2 | 13.0 | 13.4 | 13.5 | 13.5 | 13.3 | 13.2 |
| <i>ybcV</i>   | 12.7 | 12.7 | 12.6 | 12.8 | 12.9 | 13.0 | 12.7 | 12.8 |
| <i>ybcW</i>   | 14.0 | 13.7 | 13.5 | 13.6 | 15.3 | 15.9 | 15.0 | 15.5 |
| <i>ybcY</i>   | 13.2 | 13.0 | 12.9 | 13.0 | 13.3 | 13.3 | 13.0 | 13.1 |
| <i>ybdD</i>   | 15.6 | 15.9 | 15.3 | 15.9 | 14.7 | 15.5 | 14.7 | 15.1 |
| <i>ybdF</i>   | 15.1 | 15.1 | 14.6 | 14.7 | 14.6 | 15.3 | 14.7 | 14.9 |
| <i>ybdH</i>   | 15.1 | 15.0 | 15.4 | 14.8 | 14.9 | 14.8 | 14.8 | 14.9 |
| <i>ybdJ</i>   | 14.6 | 14.6 | 14.2 | 14.5 | 13.3 | 13.8 | 13.4 | 13.7 |
| <i>ybdK</i>   | 14.3 | 14.2 | 14.2 | 13.9 | 13.8 | 13.9 | 13.7 | 13.9 |
| <i>ybdL</i>   | 14.9 | 14.8 | 14.9 | 14.5 | 14.7 | 14.8 | 14.6 | 14.9 |
| <i>ybdM</i>   | 14.0 | 14.0 | 13.7 | 13.6 | 13.8 | 14.0 | 13.6 | 13.7 |
| <i>ybdN</i>   | 13.2 | 13.1 | 12.9 | 13.1 | 13.0 | 13.1 | 12.8 | 12.8 |
| <i>ybdO</i>   | 12.8 | 12.8 | 12.7 | 13.1 | 12.7 | 12.8 | 12.6 | 12.6 |
| <i>ybdR</i>   | 13.8 | 13.7 | 13.5 | 13.7 | 13.7 | 13.6 | 13.5 | 13.6 |
| <i>ybdZ</i>   | 13.1 | 18.2 | 18.4 | 12.8 | 12.7 | 18.0 | 18.2 | 12.6 |
| <i>ybeB</i>   | 16.7 | 16.8 | 16.4 | 16.4 | 16.8 | 16.6 | 16.4 | 16.6 |
| <i>ybeD</i>   | 16.3 | 16.4 | 16.6 | 16.3 | 16.5 | 16.4 | 16.3 | 16.3 |
| <i>ybeF</i>   | 13.0 | 12.9 | 12.8 | 12.9 | 12.8 | 13.0 | 12.8 | 12.7 |
| <i>ybeL</i>   | 16.3 | 16.3 | 16.1 | 15.7 | 16.9 | 16.0 | 15.7 | 16.2 |
| <i>ybeM_1</i> | 14.5 | 14.7 | 14.3 | 14.3 | 14.8 | 14.7 | 14.4 | 14.8 |
| <i>ybeM_2</i> | 14.0 | 14.0 | 13.9 | 13.5 | 13.9 | 14.2 | 14.1 | 14.2 |
| <i>ybeQ</i>   | 13.0 | 12.9 | 12.8 | 12.9 | 13.1 | 13.0 | 12.8 | 12.8 |
| <i>ybeR</i>   | 12.7 | 12.7 | 12.6 | 12.9 | 12.7 | 12.7 | 12.6 | 12.7 |
| <i>ybeT</i>   | 12.9 | 12.7 | 12.6 | 13.1 | 13.0 | 12.9 | 12.7 | 12.7 |
| <i>ybeU</i>   | 12.8 | 12.9 | 12.7 | 13.6 | 12.9 | 12.7 | 12.7 | 12.7 |
| <i>ybeX</i>   | 17.1 | 16.9 | 16.9 | 17.1 | 17.1 | 17.0 | 17.2 | 17.2 |
| <i>ybeY</i>   | 17.0 | 16.9 | 16.5 | 16.9 | 17.1 | 17.0 | 16.7 | 16.8 |
| <i>ybeZ</i>   | 16.9 | 16.9 | 16.7 | 16.8 | 16.8 | 16.9 | 16.7 | 16.8 |
| <i>ybfA</i>   | 15.0 | 15.5 | 14.9 | 14.1 | 16.3 | 16.7 | 16.1 | 16.7 |
| <i>ybfB</i>   | 12.9 | 12.9 | 12.7 | 12.8 | 13.0 | 13.1 | 12.9 | 13.0 |
| <i>ybfC</i>   | 13.4 | 13.3 | 12.9 | 13.3 | 13.4 | 13.6 | 13.2 | 13.2 |
| <i>ybfD</i>   | 13.1 | 13.0 | 12.7 | 12.9 | 13.2 | 13.1 | 13.0 | 13.1 |
| <i>ybfE</i>   | 15.4 | 15.2 | 15.1 | 14.9 | 15.1 | 15.2 | 14.7 | 15.1 |
| <i>ybfF</i>   | 15.3 | 15.4 | 15.1 | 15.2 | 14.9 | 15.3 | 14.9 | 15.0 |
| <i>ybfG</i>   | 12.9 | 13.0 | 12.7 | 13.1 | 12.9 | 12.9 | 12.7 | 12.7 |
| <i>ybfH</i>   | 13.2 | 13.2 | 13.0 | 15.7 | 13.2 | 13.3 | 12.9 | 12.9 |
| <i>ybfK</i>   | 12.8 | 12.8 | 12.7 | 13.1 | 12.9 | 12.8 | 12.7 | 12.9 |
| <i>ybfL</i>   | 13.1 | 13.1 | 12.8 | 14.4 | 13.2 | 13.1 | 12.9 | 12.9 |

|             |      |      |      |      |      |      |      |      |
|-------------|------|------|------|------|------|------|------|------|
| <i>ybfN</i> | 13.1 | 13.2 | 12.8 | 13.4 | 13.1 | 13.2 | 13.0 | 12.9 |
| <i>ybfO</i> | 13.2 | 13.2 | 13.0 | 13.6 | 13.3 | 13.3 | 13.3 | 12.9 |
| <i>ybfP</i> | 13.5 | 13.4 | 13.2 | 13.2 | 13.3 | 13.4 | 13.1 | 13.0 |
| <i>ybfQ</i> | 13.0 | 13.1 | 12.8 | 13.3 | 13.2 | 13.1 | 13.3 | 12.9 |
| <i>ybgA</i> | 15.6 | 15.7 | 14.9 | 15.4 | 15.1 | 15.4 | 14.9 | 15.4 |
| <i>ybgC</i> | 16.8 | 16.9 | 16.4 | 16.3 | 16.5 | 17.0 | 16.5 | 16.9 |
| <i>ybgD</i> | 12.6 | 12.8 | 12.6 | 13.2 | 12.7 | 12.7 | 12.5 | 12.5 |
| <i>ybgE</i> | 16.0 | 15.7 | 16.1 | 15.6 | 16.6 | 16.7 | 16.7 | 16.8 |
| <i>ybgF</i> | 18.2 | 18.2 | 17.7 | 18.3 | 17.8 | 18.1 | 17.9 | 17.8 |
| <i>ybgI</i> | 16.8 | 16.8 | 16.5 | 16.8 | 17.3 | 17.0 | 16.8 | 17.1 |
| <i>ybgJ</i> | 16.2 | 16.2 | 16.1 | 16.1 | 17.0 | 16.6 | 16.5 | 16.5 |
| <i>ybgK</i> | 15.8 | 15.8 | 16.0 | 15.8 | 16.4 | 16.0 | 16.4 | 16.2 |
| <i>ybgL</i> | 15.4 | 15.4 | 15.1 | 15.4 | 15.4 | 15.4 | 15.3 | 15.7 |
| <i>ybgO</i> | 12.8 | 12.8 | 12.6 | 13.7 | 12.9 | 12.9 | 12.6 | 12.7 |
| <i>ybgP</i> | 12.8 | 12.9 | 12.7 | 13.2 | 12.8 | 12.9 | 12.8 | 12.7 |
| <i>ybgQ</i> | 12.6 | 12.6 | 12.5 | 13.0 | 12.7 | 12.6 | 12.6 | 12.5 |
| <i>ybgS</i> | 15.3 | 15.3 | 14.4 | 14.5 | 13.6 | 14.0 | 13.4 | 13.8 |
| <i>ybgT</i> | 17.0 | 16.6 | 17.0 | 16.7 | 17.5 | 17.4 | 17.8 | 17.8 |
| <i>ybhA</i> | 15.6 | 15.7 | 15.4 | 15.5 | 15.2 | 15.7 | 15.3 | 15.4 |
| <i>ybhB</i> | 15.7 | 16.3 | 15.6 | 15.8 | 15.3 | 15.5 | 15.2 | 15.9 |
| <i>ybhC</i> | 16.8 | 16.6 | 16.8 | 16.8 | 16.5 | 16.4 | 16.7 | 16.6 |
| <i>ybhD</i> | 12.8 | 12.8 | 12.7 | 12.8 | 12.8 | 12.8 | 12.7 | 12.7 |
| <i>ybhF</i> | 14.0 | 13.9 | 14.0 | 14.0 | 14.1 | 14.0 | 14.2 | 14.0 |
| <i>ybhG</i> | 14.5 | 14.5 | 14.5 | 14.6 | 14.6 | 14.5 | 14.6 | 14.5 |
| <i>ybhH</i> | 12.7 | 12.7 | 12.6 | 12.9 | 12.8 | 12.7 | 12.7 | 12.6 |
| <i>ybhI</i> | 12.6 | 12.7 | 12.5 | 13.1 | 12.7 | 12.7 | 12.6 | 12.7 |
| <i>ybhJ</i> | 12.8 | 12.7 | 12.7 | 13.2 | 13.0 | 12.8 | 13.0 | 12.7 |
| <i>ybhK</i> | 14.6 | 14.5 | 14.3 | 14.2 | 14.5 | 14.9 | 14.4 | 14.7 |
| <i>ybhL</i> | 17.0 | 17.0 | 16.4 | 17.2 | 17.1 | 17.3 | 16.9 | 17.3 |
| <i>ybhM</i> | 13.2 | 13.3 | 13.1 | 13.0 | 13.1 | 13.3 | 13.0 | 13.0 |
| <i>ybhN</i> | 13.5 | 13.4 | 13.3 | 13.5 | 13.3 | 13.2 | 13.2 | 13.3 |
| <i>ybhO</i> | 14.1 | 14.1 | 13.9 | 14.0 | 13.9 | 13.8 | 13.8 | 13.9 |
| <i>ybhP</i> | 14.5 | 14.4 | 14.1 | 14.2 | 14.1 | 14.1 | 14.0 | 14.1 |
| <i>ybhQ</i> | 14.3 | 14.5 | 14.2 | 14.0 | 14.7 | 14.2 | 13.9 | 14.1 |
| <i>ybhR</i> | 13.9 | 13.8 | 13.6 | 13.4 | 13.7 | 13.9 | 13.7 | 13.7 |
| <i>ybhS</i> | 13.7 | 13.6 | 13.6 | 13.4 | 13.6 | 13.7 | 13.6 | 13.6 |
| <i>ybhT</i> | 16.4 | 16.4 | 16.2 | 15.3 | 16.1 | 16.4 | 15.4 | 16.6 |
| <i>ybhU</i> | 13.2 | 13.2 | 13.1 | 13.2 | 13.2 | 13.5 | 13.0 | 13.2 |
| <i>ybiA</i> | 13.8 | 13.9 | 13.6 | 13.9 | 13.7 | 14.2 | 13.6 | 13.7 |
| <i>ybiB</i> | 15.5 | 15.2 | 15.7 | 15.3 | 15.7 | 15.3 | 15.7 | 15.6 |
| <i>ybiC</i> | 17.1 | 16.8 | 16.9 | 16.9 | 16.3 | 16.5 | 16.2 | 16.3 |
| <i>ybiH</i> | 14.2 | 14.1 | 14.1 | 13.8 | 13.9 | 14.4 | 14.0 | 14.2 |
| <i>ybiI</i> | 13.8 | 16.6 | 16.2 | 13.4 | 13.6 | 14.2 | 13.8 | 13.5 |
| <i>ybiJ</i> | 15.3 | 16.1 | 15.7 | 14.5 | 14.3 | 14.2 | 13.7 | 13.7 |
| <i>ybiO</i> | 13.2 | 13.3 | 13.1 | 13.1 | 13.1 | 13.2 | 13.1 | 13.2 |
| <i>ybiP</i> | 13.8 | 13.7 | 13.5 | 13.5 | 13.5 | 13.9 | 13.5 | 13.6 |
| <i>ybiR</i> | 14.4 | 14.2 | 14.2 | 14.1 | 13.8 | 14.2 | 14.1 | 13.7 |
| <i>ybiS</i> | 16.8 | 17.0 | 16.6 | 16.6 | 16.7 | 17.0 | 16.9 | 16.9 |
| <i>ybiT</i> | 16.0 | 16.0 | 15.9 | 15.9 | 16.1 | 16.1 | 16.1 | 15.9 |
| <i>ybiU</i> | 14.2 | 14.1 | 13.8 | 13.9 | 13.0 | 13.2 | 13.2 | 13.2 |
| <i>ybiV</i> | 15.8 | 15.8 | 15.1 | 15.5 | 14.6 | 15.4 | 14.7 | 14.9 |
| <i>ybiW</i> | 12.8 | 12.8 | 12.7 | 13.1 | 13.0 | 12.9 | 13.0 | 12.8 |
| <i>ybiX</i> | 13.3 | 17.8 | 17.7 | 12.9 | 13.0 | 14.5 | 13.9 | 13.1 |
| <i>ybiY</i> | 12.8 | 12.9 | 12.6 | 13.3 | 13.0 | 12.8 | 12.9 | 12.6 |
| <i>ybjC</i> | 17.0 | 17.4 | 16.6 | 16.7 | 16.2 | 17.0 | 15.9 | 16.3 |
| <i>ybjD</i> | 14.2 | 14.0 | 13.9 | 13.8 | 13.8 | 13.8 | 13.8 | 13.8 |
| <i>ybjE</i> | 15.6 | 15.5 | 15.2 | 15.3 | 14.8 | 15.5 | 15.1 | 15.5 |
| <i>ybjG</i> | 15.4 | 15.2 | 15.2 | 14.9 | 15.5 | 15.2 | 15.2 | 15.8 |
| <i>ybjH</i> | 13.9 | 14.0 | 13.8 | 13.8 | 13.5 | 14.0 | 13.8 | 13.9 |
| <i>ybjI</i> | 15.1 | 15.1 | 14.6 | 15.0 | 14.8 | 15.2 | 14.5 | 14.8 |
| <i>ybjJ</i> | 13.9 | 13.9 | 13.7 | 13.8 | 13.7 | 13.9 | 13.7 | 13.6 |

|             |      |      |      |      |      |      |      |      |
|-------------|------|------|------|------|------|------|------|------|
| <i>ybjK</i> | 13.7 | 13.5 | 13.4 | 13.2 | 13.2 | 13.6 | 13.5 | 13.3 |
| <i>ybjL</i> | 14.6 | 14.7 | 14.4 | 14.3 | 14.6 | 15.0 | 14.7 | 14.9 |
| <i>ybjM</i> | 13.7 | 13.8 | 13.5 | 13.5 | 15.2 | 15.2 | 15.1 | 15.5 |
| <i>ybjN</i> | 16.0 | 16.0 | 15.6 | 15.5 | 15.8 | 16.2 | 15.8 | 16.1 |
| <i>ybjO</i> | 14.3 | 14.3 | 14.0 | 13.8 | 14.0 | 14.2 | 14.0 | 14.2 |
| <i>ybjP</i> | 16.8 | 16.8 | 16.5 | 16.5 | 16.3 | 16.4 | 16.3 | 16.6 |
| <i>ybjQ</i> | 16.1 | 16.1 | 15.8 | 15.6 | 16.2 | 16.3 | 15.9 | 16.1 |
| <i>ybjS</i> | 15.1 | 15.1 | 15.1 | 14.9 | 14.9 | 15.3 | 15.0 | 15.1 |
| <i>ybjT</i> | 15.0 | 15.0 | 14.7 | 14.8 | 15.0 | 15.2 | 15.1 | 15.1 |
| <i>ybjX</i> | 16.0 | 15.7 | 15.6 | 15.9 | 17.3 | 17.2 | 17.4 | 17.5 |
| <i>ycaC</i> | 16.9 | 17.0 | 16.3 | 16.5 | 16.4 | 16.5 | 15.7 | 16.4 |
| <i>ycaD</i> | 14.5 | 14.6 | 14.3 | 14.2 | 14.9 | 14.9 | 14.9 | 15.4 |
| <i>ycaI</i> | 13.1 | 13.1 | 12.9 | 13.4 | 13.2 | 13.1 | 13.0 | 12.9 |
| <i>ycaK</i> | 14.2 | 14.5 | 13.9 | 13.7 | 14.0 | 14.5 | 13.8 | 13.8 |
| <i>ycaL</i> | 13.7 | 13.5 | 13.3 | 13.4 | 13.5 | 13.6 | 13.3 | 13.3 |
| <i>ycaM</i> | 12.8 | 12.8 | 12.7 | 13.0 | 12.8 | 12.8 | 12.7 | 12.7 |
| <i>ycaN</i> | 13.8 | 13.8 | 13.4 | 13.5 | 13.7 | 14.3 | 13.7 | 13.8 |
| <i>ycaO</i> | 15.5 | 15.2 | 15.2 | 15.3 | 14.2 | 14.7 | 14.3 | 14.4 |
| <i>ycaP</i> | 14.5 | 14.4 | 14.0 | 13.8 | 14.5 | 14.5 | 14.1 | 14.4 |
| <i>ycaQ</i> | 14.1 | 13.6 | 13.4 | 13.3 | 13.6 | 13.8 | 13.5 | 13.5 |
| <i>ycaR</i> | 17.7 | 17.6 | 17.3 | 17.3 | 17.4 | 17.7 | 17.2 | 17.7 |
| <i>ycbB</i> | 14.9 | 14.9 | 14.7 | 14.6 | 14.8 | 14.8 | 14.7 | 14.8 |
| <i>ycbC</i> | 14.0 | 14.0 | 13.8 | 13.3 | 13.9 | 14.1 | 13.8 | 14.0 |
| <i>ycbF</i> | 13.3 | 13.3 | 13.1 | 13.5 | 13.3 | 13.6 | 13.3 | 13.4 |
| <i>ycbJ</i> | 13.7 | 13.7 | 13.6 | 13.4 | 15.8 | 15.9 | 15.9 | 15.9 |
| <i>ycbK</i> | 17.9 | 17.9 | 17.5 | 17.8 | 17.9 | 18.2 | 17.9 | 18.0 |
| <i>ycbL</i> | 16.5 | 16.6 | 16.5 | 16.7 | 17.0 | 16.8 | 16.8 | 16.8 |
| <i>ycbU</i> | 13.2 | 13.1 | 13.1 | 13.1 | 13.2 | 13.3 | 13.2 | 13.2 |
| <i>ycbV</i> | 13.5 | 13.4 | 13.2 | 13.2 | 13.4 | 13.7 | 13.4 | 13.3 |
| <i>ycbX</i> | 15.5 | 15.5 | 15.1 | 15.2 | 15.3 | 15.8 | 15.5 | 15.4 |
| <i>ycbZ</i> | 15.3 | 15.3 | 15.1 | 15.0 | 15.2 | 15.5 | 15.2 | 15.4 |
| <i>yccA</i> | 18.3 | 18.0 | 18.3 | 18.2 | 17.5 | 17.5 | 17.3 | 17.5 |
| <i>yccB</i> | 14.8 | 14.9 | 14.6 | 14.3 | 18.4 | 16.8 | 17.8 | 18.7 |
| <i>yccE</i> | 12.7 | 12.7 | 12.6 | 13.0 | 12.7 | 12.7 | 12.5 | 12.7 |
| <i>yccF</i> | 16.1 | 16.0 | 15.6 | 16.0 | 16.0 | 16.3 | 15.9 | 16.2 |
| <i>yccJ</i> | 17.4 | 17.4 | 16.9 | 17.2 | 17.8 | 17.9 | 17.6 | 18.2 |
| <i>yccK</i> | 15.6 | 15.5 | 15.1 | 15.2 | 15.3 | 15.7 | 14.9 | 15.4 |
| <i>yccM</i> | 12.9 | 12.9 | 12.8 | 13.1 | 13.7 | 13.9 | 13.7 | 13.8 |
| <i>yccS</i> | 14.6 | 14.5 | 14.3 | 14.4 | 14.4 | 14.8 | 14.6 | 14.6 |
| <i>yccT</i> | 13.7 | 13.8 | 13.4 | 13.5 | 13.4 | 13.9 | 13.4 | 13.6 |
| <i>yccU</i> | 15.9 | 16.1 | 16.0 | 15.8 | 15.9 | 16.0 | 15.6 | 15.8 |
| <i>yccX</i> | 15.1 | 14.5 | 14.7 | 14.9 | 15.1 | 14.5 | 14.6 | 14.9 |
| <i>ycdF</i> | 14.9 | 14.9 | 14.5 | 14.4 | 14.1 | 14.6 | 13.9 | 14.0 |
| <i>ycdT</i> | 13.7 | 13.5 | 13.4 | 13.5 | 13.9 | 14.1 | 13.7 | 13.7 |
| <i>ycdU</i> | 12.7 | 12.7 | 12.6 | 12.9 | 12.8 | 12.8 | 12.6 | 12.7 |
| <i>ycdX</i> | 17.0 | 16.9 | 16.7 | 16.9 | 16.9 | 17.0 | 16.7 | 16.7 |
| <i>ycdY</i> | 16.1 | 16.0 | 16.0 | 16.1 | 16.1 | 15.8 | 16.0 | 16.2 |
| <i>ycdZ</i> | 14.5 | 14.3 | 14.5 | 14.1 | 14.6 | 14.5 | 14.6 | 14.6 |
| <i>yceA</i> | 17.0 | 17.3 | 16.6 | 16.9 | 13.8 | 14.5 | 13.8 | 14.2 |
| <i>yceB</i> | 15.7 | 15.8 | 15.1 | 15.6 | 15.3 | 16.2 | 15.5 | 15.9 |
| <i>yceD</i> | 19.1 | 19.2 | 19.4 | 19.0 | 19.3 | 19.1 | 19.1 | 19.1 |
| <i>yceF</i> | 16.2 | 16.4 | 15.8 | 16.1 | 16.1 | 16.3 | 15.9 | 16.4 |
| <i>yceG</i> | 14.9 | 14.8 | 14.5 | 14.6 | 14.7 | 14.8 | 14.5 | 14.7 |
| <i>yceH</i> | 16.1 | 16.2 | 15.8 | 16.2 | 16.1 | 16.3 | 16.0 | 16.2 |
| <i>yceI</i> | 16.6 | 16.6 | 16.0 | 16.3 | 13.4 | 14.4 | 13.5 | 13.6 |
| <i>yceJ</i> | 15.0 | 15.1 | 14.5 | 14.3 | 13.0 | 13.6 | 13.0 | 13.1 |
| <i>yceK</i> | 13.7 | 13.9 | 14.2 | 13.9 | 13.4 | 13.9 | 13.8 | 14.9 |
| <i>yceM</i> | 14.9 | 15.0 | 14.8 | 14.7 | 15.0 | 15.1 | 15.1 | 15.1 |
| <i>yceO</i> | 13.3 | 13.3 | 13.2 | 13.1 | 13.3 | 13.4 | 13.2 | 13.3 |
| <i>yceQ</i> | 13.1 | 13.0 | 12.9 | 13.2 | 12.9 | 13.1 | 12.7 | 12.8 |
| <i>ycfD</i> | 16.0 | 16.0 | 16.0 | 15.9 | 16.1 | 16.1 | 16.0 | 16.1 |

|               |      |      |      |      |      |      |      |      |
|---------------|------|------|------|------|------|------|------|------|
| <i>ycfH</i>   | 15.4 | 15.4 | 15.1 | 15.2 | 15.1 | 15.3 | 14.9 | 15.1 |
| <i>ycfJ</i>   | 13.8 | 13.5 | 13.5 | 13.6 | 13.6 | 13.4 | 13.4 | 13.6 |
| <i>ycfK</i>   | 12.9 | 12.9 | 12.8 | 13.3 | 12.9 | 13.0 | 12.9 | 12.7 |
| <i>ycfL</i>   | 16.8 | 16.5 | 16.6 | 16.6 | 17.2 | 16.8 | 17.1 | 17.0 |
| <i>ycfP</i>   | 17.1 | 16.5 | 16.6 | 17.0 | 17.7 | 17.4 | 17.3 | 17.4 |
| <i>ycfQ</i>   | 15.3 | 15.4 | 14.9 | 15.0 | 15.0 | 15.7 | 15.2 | 15.3 |
| <i>ycfS</i>   | 14.3 | 13.9 | 14.0 | 13.8 | 13.3 | 13.5 | 13.1 | 13.0 |
| <i>ycfT</i>   | 12.7 | 12.6 | 12.6 | 12.9 | 12.8 | 12.7 | 12.7 | 12.6 |
| <i>ycfZ</i>   | 13.0 | 12.9 | 12.8 | 12.8 | 12.8 | 12.8 | 12.7 | 12.8 |
| <i>ycgB</i>   | 15.3 | 15.6 | 14.9 | 15.0 | 14.5 | 15.0 | 14.3 | 14.6 |
| <i>ycgE</i>   | 16.1 | 16.2 | 15.5 | 15.8 | 15.8 | 16.1 | 15.3 | 15.5 |
| <i>ycgF</i>   | 14.6 | 14.7 | 13.9 | 14.2 | 13.1 | 13.5 | 13.0 | 13.0 |
| <i>ycgG</i>   | 12.8 | 12.8 | 12.6 | 13.9 | 12.7 | 12.8 | 12.6 | 12.6 |
| <i>ycgH_1</i> | 13.5 | 13.2 | 13.1 | 13.7 | 13.5 | 13.9 | 13.6 | 13.4 |
| <i>ycgH_2</i> | 13.9 | 13.7 | 13.6 | 13.6 | 14.1 | 14.2 | 14.0 | 13.9 |
| <i>ycgI</i>   | 13.8 | 13.7 | 13.5 | 13.6 | 13.8 | 13.6 | 13.5 | 13.3 |
| <i>ycgJ</i>   | 16.4 | 16.5 | 15.7 | 16.5 | 15.4 | 15.9 | 15.0 | 15.4 |
| <i>ycgL</i>   | 16.5 | 16.5 | 16.0 | 16.1 | 16.4 | 16.7 | 15.9 | 16.2 |
| <i>ycgM</i>   | 15.4 | 15.6 | 15.2 | 15.3 | 15.6 | 15.9 | 15.3 | 15.6 |
| <i>ycgN</i>   | 15.3 | 15.5 | 14.8 | 14.8 | 15.2 | 15.7 | 15.0 | 15.5 |
| <i>ycgR</i>   | 13.2 | 13.6 | 13.1 | 13.1 | 13.1 | 13.3 | 12.9 | 12.7 |
| <i>ycgV</i>   | 13.1 | 13.1 | 12.9 | 13.2 | 13.7 | 13.6 | 13.3 | 13.6 |
| <i>ycgX</i>   | 13.3 | 13.2 | 13.2 | 13.1 | 13.1 | 13.2 | 12.9 | 12.9 |
| <i>ycgY</i>   | 13.0 | 12.9 | 12.8 | 13.1 | 13.0 | 13.2 | 12.9 | 12.9 |
| <i>ycgZ</i>   | 14.8 | 14.6 | 14.3 | 14.1 | 13.3 | 13.4 | 12.9 | 13.1 |
| <i>ychA</i>   | 16.4 | 16.3 | 15.9 | 16.4 | 16.2 | 16.6 | 16.1 | 16.5 |
| <i>ychE</i>   | 13.3 | 13.4 | 13.2 | 13.2 | 13.8 | 14.1 | 13.8 | 13.9 |
| <i>ychE_1</i> | 13.6 | 13.6 | 13.5 | 14.1 | 13.8 | 13.5 | 13.5 | 13.5 |
| <i>ychE_2</i> | 13.6 | 13.6 | 13.6 | 13.6 | 13.2 | 13.4 | 13.3 | 14.0 |
| <i>ychF</i>   | 17.3 | 17.2 | 17.1 | 17.2 | 16.5 | 16.8 | 16.5 | 16.6 |
| <i>ychG_1</i> | 13.2 | 13.3 | 13.3 | 13.4 | 13.3 | 13.2 | 13.3 | 13.1 |
| <i>ychG_2</i> | 12.8 | 12.7 | 12.7 | 12.9 | 12.8 | 12.7 | 12.7 | 12.7 |
| <i>ychH</i>   | 15.4 | 15.6 | 15.9 | 15.5 | 15.9 | 15.9 | 15.5 | 15.5 |
| <i>ychJ</i>   | 16.9 | 16.8 | 16.3 | 16.7 | 16.7 | 16.8 | 16.2 | 16.4 |
| <i>ychM</i>   | 13.9 | 14.2 | 13.9 | 13.7 | 14.4 | 14.8 | 15.0 | 14.8 |
| <i>ychN</i>   | 15.8 | 15.9 | 15.6 | 15.3 | 16.1 | 15.7 | 15.5 | 15.7 |
| <i>ychO</i>   | 13.9 | 13.9 | 13.6 | 13.7 | 14.0 | 14.1 | 13.8 | 13.7 |
| <i>ychQ</i>   | 15.9 | 15.9 | 15.4 | 15.5 | 15.7 | 15.9 | 15.4 | 15.9 |
| <i>ychS</i>   | 12.8 | 12.7 | 12.6 | 12.8 | 12.8 | 12.7 | 12.8 | 12.8 |
| <i>yciA</i>   | 16.6 | 16.1 | 15.6 | 15.9 | 16.3 | 16.3 | 15.6 | 16.1 |
| <i>yciB</i>   | 16.3 | 16.3 | 15.8 | 15.8 | 16.0 | 16.8 | 16.1 | 16.2 |
| <i>yciC</i>   | 15.8 | 15.9 | 15.5 | 15.6 | 15.6 | 16.1 | 15.6 | 15.9 |
| <i>yciE</i>   | 14.5 | 14.6 | 14.0 | 14.6 | 13.5 | 14.0 | 13.3 | 13.5 |
| <i>yciF</i>   | 14.6 | 14.7 | 14.0 | 14.4 | 13.6 | 13.9 | 13.3 | 13.4 |
| <i>yciG</i>   | 15.4 | 15.6 | 14.8 | 15.1 | 14.5 | 15.0 | 13.9 | 14.4 |
| <i>yciH</i>   | 16.6 | 16.5 | 16.0 | 16.4 | 16.0 | 15.8 | 15.5 | 15.6 |
| <i>yciI</i>   | 17.3 | 17.8 | 17.3 | 16.7 | 17.2 | 17.8 | 17.2 | 17.3 |
| <i>yciK</i>   | 15.4 | 15.5 | 15.2 | 15.0 | 15.3 | 15.8 | 15.4 | 15.6 |
| <i>yciM</i>   | 15.2 | 15.1 | 14.8 | 14.9 | 15.3 | 15.3 | 15.0 | 15.4 |
| <i>yciN</i>   | 16.3 | 16.3 | 16.0 | 15.5 | 16.1 | 16.6 | 15.5 | 15.9 |
| <i>yciO</i>   | 16.0 | 16.0 | 15.5 | 15.9 | 15.8 | 16.0 | 15.6 | 16.0 |
| <i>yciQ</i>   | 13.7 | 13.7 | 13.4 | 13.9 | 13.8 | 13.8 | 13.5 | 13.6 |
| <i>yciS</i>   | 16.5 | 16.4 | 16.1 | 16.5 | 16.6 | 16.6 | 16.6 | 16.9 |
| <i>yciT</i>   | 15.3 | 15.5 | 14.9 | 15.2 | 15.7 | 16.2 | 15.7 | 16.0 |
| <i>yciU</i>   | 16.4 | 16.7 | 16.0 | 16.6 | 16.1 | 16.5 | 15.9 | 16.3 |
| <i>yciV</i>   | 15.4 | 15.4 | 15.1 | 15.0 | 15.4 | 15.4 | 15.2 | 15.3 |
| <i>yciW</i>   | 16.4 | 16.7 | 16.1 | 16.3 | 16.3 | 16.8 | 16.3 | 16.4 |
| <i>yciX</i>   | 17.0 | 16.3 | 16.2 | 16.8 | 16.4 | 15.8 | 15.2 | 16.2 |
| <i>yciY</i>   | 15.9 | 15.9 | 15.6 | 15.2 | 16.1 | 16.4 | 15.5 | 16.0 |
| <i>yciZ</i>   | 16.7 | 16.7 | 16.1 | 16.4 | 17.0 | 17.6 | 16.9 | 17.1 |
| <i>ycjD</i>   | 13.5 | 13.5 | 13.2 | 13.7 | 13.5 | 13.6 | 13.4 | 13.5 |

|        |      |      |      |      |      |      |      |      |
|--------|------|------|------|------|------|------|------|------|
| ycjF   | 14.2 | 14.0 | 14.1 | 14.0 | 14.2 | 14.0 | 14.0 | 14.0 |
| ycjG   | 14.3 | 14.4 | 14.1 | 14.3 | 14.8 | 14.7 | 14.6 | 14.5 |
| ycjM   | 12.7 | 12.7 | 12.6 | 13.2 | 12.8 | 12.7 | 12.7 | 12.6 |
| ycjN   | 12.7 | 12.7 | 12.6 | 12.9 | 12.7 | 12.7 | 12.7 | 12.6 |
| ycjO   | 12.6 | 12.5 | 12.6 | 12.8 | 12.7 | 12.5 | 12.7 | 12.6 |
| ycjP   | 13.0 | 12.8 | 12.7 | 13.0 | 12.9 | 12.8 | 12.8 | 12.7 |
| ycjQ   | 13.0 | 12.9 | 12.8 | 13.0 | 12.9 | 12.9 | 13.0 | 12.9 |
| ycjR   | 12.9 | 12.8 | 12.9 | 12.9 | 13.0 | 13.0 | 13.1 | 12.8 |
| ycjS   | 13.1 | 13.1 | 12.9 | 13.1 | 13.1 | 13.2 | 13.1 | 13.0 |
| ycjT   | 12.8 | 12.8 | 12.7 | 13.0 | 13.0 | 12.9 | 12.9 | 12.8 |
| ycjU   | 12.8 | 12.8 | 12.6 | 12.9 | 12.8 | 12.8 | 12.8 | 12.6 |
| ycjV   | 12.7 | 12.7 | 12.6 | 13.0 | 12.9 | 12.8 | 12.8 | 12.7 |
| ycjW   | 14.7 | 14.7 | 14.2 | 14.3 | 14.2 | 14.6 | 14.0 | 14.3 |
| ycjX   | 14.6 | 14.5 | 14.4 | 14.3 | 14.5 | 14.5 | 14.4 | 14.5 |
| ycjY   | 13.7 | 13.6 | 13.4 | 13.8 | 13.4 | 13.7 | 13.4 | 13.5 |
| ycjZ   | 14.2 | 14.2 | 13.9 | 13.9 | 14.9 | 14.3 | 13.8 | 13.9 |
| ydaC   | 13.0 | 13.0 | 12.8 | 13.0 | 13.0 | 13.2 | 12.8 | 12.8 |
| ydaE   | 13.0 | 14.0 | 12.7 | 13.3 | 13.0 | 13.4 | 12.9 | 12.7 |
| ydaF   | 13.3 | 13.4 | 13.3 | 13.9 | 13.5 | 13.9 | 13.5 | 13.5 |
| ydaG   | 13.4 | 13.4 | 13.2 | 14.0 | 13.7 | 14.0 | 13.6 | 13.6 |
| ydaL   | 14.8 | 14.9 | 14.8 | 14.3 | 14.6 | 15.0 | 14.6 | 14.7 |
| ydaM   | 15.4 | 15.3 | 14.6 | 15.3 | 14.9 | 14.9 | 14.5 | 14.9 |
| ydaN   | 15.0 | 15.1 | 14.9 | 14.9 | 15.2 | 15.0 | 14.9 | 15.2 |
| ydaQ   | 12.9 | 12.9 | 12.8 | 13.2 | 13.2 | 12.9 | 12.9 | 12.8 |
| ydaS   | 13.6 | 13.6 | 13.2 | 13.7 | 13.4 | 13.9 | 13.4 | 13.5 |
| ydaT   | 13.5 | 13.4 | 13.1 | 13.6 | 13.5 | 13.5 | 13.3 | 13.3 |
| ydaU   | 13.2 | 13.2 | 13.0 | 13.3 | 13.2 | 13.4 | 13.1 | 13.0 |
| ydaV   | 13.0 | 13.0 | 12.9 | 13.3 | 13.1 | 13.0 | 13.1 | 12.8 |
| ydaW   | 13.4 | 13.4 | 13.1 | 13.3 | 13.4 | 13.5 | 13.3 | 13.3 |
| ydaY   | 13.2 | 13.2 | 13.0 | 13.2 | 13.4 | 13.4 | 13.1 | 13.3 |
| ydbA_1 | 13.5 | 13.5 | 13.4 | 13.4 | 13.7 | 14.0 | 13.9 | 13.4 |
| ydbA_2 | 14.5 | 14.5 | 14.2 | 14.4 | 14.9 | 14.8 | 14.5 | 14.4 |
| ydbC   | 14.2 | 14.1 | 14.1 | 13.7 | 14.2 | 14.0 | 14.2 | 14.3 |
| ydbD   | 12.7 | 12.8 | 12.6 | 12.9 | 12.9 | 12.9 | 12.7 | 12.6 |
| ydbH   | 13.9 | 13.8 | 13.6 | 13.5 | 13.8 | 13.9 | 13.6 | 13.7 |
| ydbJ   | 16.3 | 16.1 | 16.3 | 16.0 | 17.0 | 16.7 | 16.6 | 17.4 |
| ydbK   | 15.7 | 14.8 | 16.0 | 15.5 | 14.6 | 14.0 | 14.7 | 15.0 |
| ydbL   | 14.9 | 14.7 | 14.3 | 14.6 | 14.7 | 15.0 | 14.2 | 14.5 |
| ydcA   | 15.4 | 14.8 | 15.0 | 15.1 | 16.1 | 15.8 | 15.4 | 15.9 |
| ydcC   | 13.1 | 13.0 | 12.8 | 13.3 | 13.3 | 13.2 | 12.9 | 12.8 |
| ydcD   | 13.1 | 13.1 | 13.0 | 13.6 | 13.0 | 13.2 | 12.8 | 12.8 |
| ydcF   | 15.5 | 15.7 | 15.5 | 15.2 | 15.4 | 15.8 | 15.5 | 15.5 |
| ydcH   | 14.7 | 14.7 | 14.7 | 13.9 | 14.6 | 15.1 | 14.2 | 14.5 |
| ydcI   | 15.9 | 15.8 | 15.7 | 15.9 | 12.8 | 12.8 | 12.8 | 13.0 |
| ydcJ   | 13.4 | 13.3 | 13.2 | 13.3 | 13.1 | 13.1 | 13.1 | 13.0 |
| ydcK   | 14.3 | 14.4 | 13.8 | 14.0 | 14.0 | 14.2 | 13.7 | 14.0 |
| ydcL   | 15.9 | 15.7 | 15.3 | 15.9 | 15.8 | 15.7 | 15.2 | 15.7 |
| ydcM   | 14.3 | 14.3 | 13.9 | 14.1 | 14.3 | 14.5 | 14.1 | 14.3 |
| ydcN   | 14.6 | 14.6 | 14.4 | 13.7 | 14.5 | 14.8 | 14.4 | 14.5 |
| ydcO   | 13.2 | 13.2 | 13.2 | 13.1 | 13.2 | 13.5 | 13.2 | 12.9 |
| ydcP   | 15.4 | 15.1 | 15.0 | 15.3 | 15.2 | 15.3 | 15.1 | 15.4 |
| ydcR   | 14.5 | 14.4 | 14.1 | 14.3 | 13.9 | 14.1 | 13.8 | 14.0 |
| ydcS   | 13.6 | 13.6 | 13.5 | 13.4 | 13.2 | 13.3 | 13.2 | 13.1 |
| ydcT   | 13.2 | 13.3 | 13.1 | 13.4 | 13.1 | 13.0 | 13.0 | 12.8 |
| ydcU   | 13.1 | 13.1 | 13.0 | 13.0 | 12.9 | 13.1 | 12.9 | 13.0 |
| ydcV   | 13.3 | 13.2 | 13.2 | 13.4 | 13.2 | 13.0 | 12.9 | 12.8 |
| ydcW   | 14.2 | 14.3 | 13.9 | 14.3 | 13.8 | 13.7 | 13.6 | 13.5 |
| ydcX   | 15.8 | 15.9 | 15.1 | 15.1 | 13.4 | 14.3 | 13.6 | 13.9 |
| ydcY   | 16.6 | 16.5 | 16.5 | 15.9 | 16.4 | 16.6 | 16.1 | 16.5 |
| ydcZ   | 14.7 | 14.7 | 14.3 | 14.3 | 15.1 | 15.3 | 15.1 | 15.7 |
| ydda   | 12.9 | 14.9 | 14.6 | 12.9 | 12.7 | 16.4 | 14.7 | 12.6 |



|      |      |      |      |      |      |      |      |      |
|------|------|------|------|------|------|------|------|------|
| yddb | 13.4 | 15.9 | 15.8 | 13.2 | 12.8 | 17.3 | 15.8 | 12.8 |
| yddE | 14.8 | 14.8 | 14.4 | 14.5 | 14.7 | 15.0 | 14.7 | 14.9 |
| yddG | 14.9 | 14.9 | 14.4 | 14.4 | 15.0 | 15.5 | 14.8 | 14.9 |
| yddH | 13.4 | 13.5 | 13.4 | 14.8 | 13.6 | 13.4 | 13.4 | 13.3 |
| yddJ | 12.7 | 12.7 | 12.5 | 13.2 | 12.8 | 12.7 | 12.6 | 12.8 |
| yddK | 12.5 | 12.6 | 12.3 | 12.7 | 12.5 | 12.6 | 12.3 | 12.5 |
| yddL | 12.9 | 12.8 | 12.8 | 13.3 | 13.0 | 13.0 | 12.8 | 12.8 |
| yddM | 14.9 | 15.0 | 14.5 | 14.6 | 14.4 | 15.3 | 14.4 | 14.8 |
| yddW | 14.8 | 14.7 | 14.7 | 14.5 | 14.5 | 14.6 | 14.7 | 14.8 |
| ydeA | 14.9 | 15.2 | 14.5 | 14.3 | 14.4 | 15.2 | 14.6 | 14.8 |
| ydeE | 13.5 | 13.4 | 13.3 | 13.4 | 13.2 | 13.6 | 13.3 | 13.3 |
| ydeH | 13.8 | 13.7 | 13.5 | 13.5 | 13.7 | 14.2 | 13.7 | 13.5 |
| ydeI | 14.2 | 14.4 | 13.7 | 14.1 | 14.1 | 14.5 | 13.8 | 14.2 |
| ydeJ | 13.3 | 13.4 | 13.1 | 13.4 | 13.8 | 13.5 | 13.1 | 13.1 |
| ydeK | 13.4 | 13.4 | 13.2 | 13.6 | 14.0 | 13.7 | 13.6 | 13.5 |
| ydeM | 12.8 | 12.8 | 12.7 | 13.0 | 12.8 | 12.8 | 12.6 | 12.7 |
| ydeN | 13.7 | 13.1 | 13.4 | 13.2 | 13.0 | 13.0 | 12.9 | 12.8 |
| ydeO | 12.9 | 12.9 | 12.8 | 12.8 | 12.9 | 13.0 | 12.9 | 12.8 |
| ydeP | 13.1 | 13.2 | 13.1 | 14.3 | 13.2 | 13.5 | 13.1 | 13.0 |
| ydeQ | 12.6 | 12.6 | 12.5 | 13.2 | 12.7 | 12.6 | 12.6 | 12.6 |
| ydeR | 12.8 | 12.9 | 12.6 | 12.9 | 12.9 | 12.9 | 12.7 | 12.8 |
| ydeS | 12.6 | 12.7 | 12.6 | 13.8 | 12.7 | 12.8 | 12.6 | 12.6 |
| ydeT | 12.6 | 12.7 | 12.5 | 13.0 | 12.7 | 12.8 | 12.5 | 12.6 |
| ydeU | 13.6 | 13.6 | 13.4 | 13.7 | 13.9 | 13.8 | 13.9 | 13.8 |
| ydfA | 13.5 | 13.5 | 13.2 | 12.9 | 13.6 | 13.5 | 13.4 | 13.1 |
| ydfB | 14.2 | 14.3 | 13.7 | 13.7 | 14.0 | 14.3 | 13.8 | 13.9 |
| ydfD | 13.0 | 13.2 | 13.0 | 13.1 | 13.0 | 13.2 | 13.0 | 13.1 |
| ydfE | 14.0 | 14.2 | 13.7 | 13.9 | 14.1 | 14.2 | 13.9 | 14.1 |
| ydfG | 17.2 | 16.8 | 16.9 | 17.2 | 17.4 | 16.8 | 17.2 | 17.5 |
| ydfH | 15.6 | 15.7 | 15.2 | 15.4 | 15.7 | 16.3 | 15.8 | 16.2 |
| ydfI | 13.2 | 13.3 | 12.9 | 13.4 | 13.0 | 13.3 | 13.0 | 13.0 |
| ydfJ | 12.8 | 12.8 | 12.6 | 13.0 | 12.8 | 12.9 | 12.7 | 12.6 |
| ydfK | 13.4 | 13.5 | 13.2 | 13.7 | 13.5 | 13.6 | 13.3 | 13.0 |
| ydfN | 12.9 | 12.9 | 12.7 | 12.9 | 12.8 | 12.9 | 12.8 | 12.7 |
| ydfO | 12.8 | 12.8 | 12.8 | 13.0 | 12.9 | 13.1 | 12.8 | 12.9 |
| ydfP | 12.9 | 13.0 | 12.7 | 13.4 | 12.9 | 12.9 | 12.8 | 12.7 |
| ydfQ | 12.9 | 13.0 | 12.8 | 13.2 | 13.1 | 12.9 | 12.9 | 12.8 |
| ydfR | 13.2 | 13.2 | 13.0 | 13.3 | 13.2 | 13.3 | 13.1 | 12.9 |
| ydfT | 13.7 | 13.7 | 13.3 | 13.5 | 13.8 | 13.7 | 13.3 | 13.4 |
| ydfU | 12.7 | 12.7 | 12.6 | 13.1 | 12.8 | 12.7 | 12.7 | 12.6 |
| ydfV | 12.9 | 12.9 | 13.0 | 12.9 | 12.9 | 13.0 | 12.8 | 13.0 |
| ydfW | 13.4 | 13.4 | 13.1 | 13.3 | 13.2 | 13.5 | 13.0 | 13.1 |
| ydfX | 13.1 | 13.2 | 13.0 | 13.5 | 13.1 | 13.2 | 13.1 | 13.0 |
| ydfZ | 15.0 | 14.3 | 14.7 | 13.9 | 20.4 | 20.0 | 20.1 | 19.9 |
| ydgA | 17.0 | 16.8 | 16.5 | 17.0 | 17.0 | 16.9 | 16.7 | 16.9 |
| ydgC | 15.6 | 15.5 | 15.1 | 15.0 | 13.8 | 14.6 | 14.0 | 14.4 |
| ydgD | 14.8 | 14.7 | 14.4 | 14.7 | 14.6 | 14.8 | 14.5 | 14.9 |
| ydgH | 17.3 | 17.3 | 17.0 | 17.1 | 17.2 | 17.4 | 17.2 | 17.6 |
| ydgI | 13.4 | 13.3 | 13.3 | 13.2 | 13.4 | 13.6 | 13.6 | 13.4 |
| ydgJ | 15.7 | 15.7 | 15.5 | 15.5 | 15.5 | 15.4 | 15.4 | 15.5 |
| ydgK | 15.3 | 15.2 | 15.0 | 14.6 | 15.7 | 15.8 | 15.5 | 16.0 |
| ydgU | 13.2 | 13.2 | 13.0 | 13.1 | 13.2 | 13.1 | 13.0 | 13.4 |
| ydhB | 13.6 | 13.7 | 13.4 | 13.3 | 13.5 | 13.6 | 13.4 | 13.4 |
| ydhC | 13.6 | 13.6 | 13.5 | 13.2 | 13.3 | 13.5 | 13.4 | 13.6 |
| ydhF | 15.7 | 15.7 | 15.4 | 15.5 | 15.8 | 15.8 | 15.7 | 15.8 |
| ydhI | 13.9 | 13.7 | 13.5 | 13.0 | 13.6 | 13.9 | 13.6 | 13.8 |
| ydhJ | 13.5 | 13.5 | 13.3 | 13.5 | 13.4 | 13.5 | 13.3 | 13.3 |
| ydhK | 13.1 | 12.9 | 12.9 | 13.2 | 13.0 | 13.0 | 13.1 | 12.9 |
| ydhL | 14.2 | 14.3 | 13.8 | 13.6 | 14.1 | 14.4 | 13.8 | 14.2 |
| ydhO | 15.8 | 15.7 | 15.5 | 15.5 | 15.5 | 15.9 | 15.3 | 15.4 |
| ydhP | 14.2 | 14.3 | 14.0 | 13.8 | 13.6 | 13.8 | 13.5 | 13.5 |

|             |      |      |      |      |      |      |      |      |
|-------------|------|------|------|------|------|------|------|------|
| <i>ydhQ</i> | 16.2 | 16.0 | 15.9 | 16.1 | 16.7 | 16.1 | 16.1 | 16.2 |
| <i>ydhR</i> | 18.0 | 18.1 | 17.6 | 17.2 | 17.8 | 18.1 | 17.5 | 18.0 |
| <i>ydhS</i> | 14.6 | 14.6 | 14.2 | 14.3 | 14.3 | 14.4 | 14.1 | 14.4 |
| <i>ydhT</i> | 13.1 | 13.1 | 12.9 | 12.9 | 13.5 | 13.2 | 13.2 | 13.2 |
| <i>ydhU</i> | 13.3 | 13.2 | 13.1 | 13.2 | 13.6 | 13.4 | 13.3 | 13.5 |
| <i>ydhV</i> | 12.8 | 12.7 | 12.6 | 12.9 | 13.7 | 12.9 | 12.8 | 13.6 |
| <i>ydhW</i> | 13.3 | 13.4 | 13.1 | 13.3 | 13.7 | 13.5 | 13.4 | 13.7 |
| <i>ydhX</i> | 13.0 | 13.0 | 12.8 | 13.6 | 13.5 | 13.2 | 13.0 | 13.4 |
| <i>ydhY</i> | 12.8 | 12.8 | 12.6 | 13.1 | 14.3 | 12.8 | 12.9 | 14.1 |
| <i>ydhZ</i> | 15.3 | 14.7 | 14.4 | 14.8 | 14.7 | 15.0 | 14.0 | 14.6 |
| <i>ydiB</i> | 13.5 | 13.4 | 13.6 | 13.6 | 13.7 | 13.6 | 13.3 | 13.3 |
| <i>ydiE</i> | 13.8 | 16.6 | 16.2 | 13.6 | 13.1 | 16.7 | 15.8 | 13.0 |
| <i>ydiF</i> | 12.8 | 12.9 | 12.8 | 13.0 | 13.0 | 12.9 | 12.8 | 12.7 |
| <i>ydiH</i> | 17.6 | 17.9 | 17.1 | 16.8 | 18.3 | 18.8 | 18.1 | 18.5 |
| <i>ydiI</i> | 16.3 | 15.3 | 16.0 | 16.1 | 16.5 | 15.7 | 16.3 | 16.6 |
| <i>ydiJ</i> | 16.9 | 15.5 | 16.8 | 16.9 | 17.1 | 15.9 | 17.2 | 17.1 |
| <i>ydiK</i> | 15.0 | 15.0 | 14.9 | 14.8 | 15.3 | 15.4 | 15.4 | 15.5 |
| <i>ydiL</i> | 12.8 | 12.8 | 12.8 | 13.0 | 13.0 | 13.1 | 12.8 | 13.1 |
| <i>ydiM</i> | 12.6 | 12.6 | 12.5 | 13.0 | 12.7 | 12.7 | 12.6 | 12.6 |
| <i>ydiN</i> | 12.6 | 12.7 | 12.5 | 12.7 | 12.7 | 12.7 | 12.6 | 12.6 |
| <i>ydiO</i> | 12.9 | 13.0 | 12.8 | 13.2 | 13.0 | 13.0 | 12.9 | 12.8 |
| <i>ydiP</i> | 13.8 | 13.9 | 13.6 | 13.7 | 14.1 | 14.2 | 13.8 | 13.8 |
| <i>ydiQ</i> | 13.1 | 13.2 | 12.9 | 12.9 | 13.2 | 13.1 | 13.1 | 13.0 |
| <i>ydiR</i> | 13.3 | 13.2 | 13.1 | 13.5 | 13.4 | 13.3 | 13.3 | 13.2 |
| <i>ydiS</i> | 12.9 | 12.9 | 12.9 | 13.0 | 13.1 | 13.0 | 13.0 | 12.9 |
| <i>ydiT</i> | 13.0 | 12.9 | 12.9 | 13.0 | 13.1 | 12.9 | 12.9 | 12.9 |
| <i>ydiU</i> | 15.2 | 15.4 | 14.7 | 15.1 | 13.5 | 13.6 | 13.3 | 13.5 |
| <i>ydiV</i> | 14.2 | 14.0 | 13.8 | 13.7 | 14.4 | 14.1 | 13.8 | 14.2 |
| <i>ydiY</i> | 14.9 | 14.9 | 14.7 | 14.4 | 14.6 | 14.9 | 14.6 | 14.4 |
| <i>ydiZ</i> | 16.8 | 16.8 | 16.3 | 16.5 | 17.1 | 17.2 | 16.6 | 16.8 |
| <i>ydjA</i> | 16.5 | 16.6 | 16.5 | 16.5 | 16.0 | 16.2 | 15.9 | 15.5 |
| <i>ydjE</i> | 12.7 | 12.7 | 12.6 | 12.8 | 12.9 | 12.7 | 12.7 | 12.7 |
| <i>ydjF</i> | 14.4 | 14.4 | 13.9 | 14.4 | 14.2 | 14.4 | 13.7 | 14.0 |
| <i>ydjG</i> | 13.4 | 13.3 | 13.1 | 13.2 | 13.4 | 13.5 | 13.2 | 13.2 |
| <i>ydjH</i> | 13.1 | 13.0 | 12.8 | 13.1 | 13.2 | 13.2 | 13.0 | 12.9 |
| <i>ydjI</i> | 13.1 | 13.1 | 12.9 | 13.3 | 13.2 | 13.2 | 13.1 | 12.9 |
| <i>ydjJ</i> | 12.9 | 12.9 | 12.8 | 13.6 | 13.0 | 13.1 | 12.9 | 12.8 |
| <i>ydjK</i> | 12.7 | 12.7 | 12.6 | 13.5 | 12.9 | 12.8 | 12.7 | 12.7 |
| <i>ydjL</i> | 12.8 | 12.8 | 12.8 | 13.1 | 13.1 | 13.0 | 12.9 | 12.9 |
| <i>ydjM</i> | 13.1 | 13.2 | 13.1 | 13.0 | 12.9 | 13.0 | 12.9 | 12.9 |
| <i>ydjN</i> | 18.0 | 17.9 | 18.0 | 17.9 | 17.8 | 18.0 | 17.9 | 18.0 |
| <i>ydjO</i> | 12.7 | 12.7 | 12.6 | 12.8 | 12.7 | 12.8 | 12.8 | 12.6 |
| <i>ydjX</i> | 13.2 | 13.0 | 13.1 | 13.3 | 16.4 | 16.3 | 16.4 | 16.6 |
| <i>ydjY</i> | 13.5 | 13.4 | 13.3 | 13.2 | 16.8 | 16.2 | 16.5 | 16.7 |
| <i>ydjZ</i> | 13.7 | 13.6 | 13.6 | 13.5 | 15.6 | 15.7 | 15.8 | 16.2 |
| <i>yeaC</i> | 18.4 | 17.2 | 18.0 | 18.4 | 15.5 | 15.5 | 15.4 | 15.7 |
| <i>yeaD</i> | 17.1 | 16.8 | 16.8 | 17.1 | 16.8 | 17.2 | 17.0 | 16.8 |
| <i>yeaE</i> | 14.3 | 14.2 | 14.0 | 14.2 | 14.6 | 14.4 | 14.3 | 14.6 |
| <i>yeaG</i> | 16.3 | 16.5 | 15.9 | 16.2 | 15.6 | 15.9 | 15.4 | 15.8 |
| <i>yeaH</i> | 14.9 | 15.0 | 14.6 | 14.9 | 14.4 | 14.7 | 14.2 | 14.5 |
| <i>yeaI</i> | 12.6 | 12.5 | 12.4 | 12.8 | 12.8 | 12.9 | 12.7 | 12.8 |
| <i>yeaJ</i> | 13.9 | 13.8 | 13.6 | 13.3 | 13.5 | 14.0 | 13.5 | 13.6 |
| <i>yeaK</i> | 16.1 | 16.1 | 15.6 | 15.5 | 16.0 | 16.5 | 15.9 | 16.2 |
| <i>yeaL</i> | 14.1 | 14.0 | 13.8 | 13.7 | 14.2 | 14.3 | 14.3 | 14.5 |
| <i>yeaM</i> | 13.8 | 13.8 | 13.6 | 13.4 | 13.7 | 13.9 | 13.7 | 13.7 |
| <i>yeaN</i> | 13.1 | 13.2 | 13.2 | 13.0 | 13.1 | 13.5 | 13.4 | 13.1 |
| <i>yeaO</i> | 15.5 | 15.7 | 15.0 | 15.0 | 15.3 | 16.1 | 15.2 | 15.5 |
| <i>yeaP</i> | 15.8 | 16.0 | 15.5 | 15.7 | 15.4 | 16.0 | 15.3 | 15.4 |
| <i>yeaQ</i> | 18.7 | 18.0 | 17.9 | 18.1 | 18.2 | 17.8 | 17.4 | 18.5 |
| <i>yeaR</i> | 13.6 | 13.7 | 13.4 | 13.3 | 13.0 | 13.0 | 13.0 | 13.0 |
| <i>yeaV</i> | 12.6 | 12.6 | 12.6 | 13.3 | 12.7 | 12.5 | 12.6 | 12.5 |

|               |      |      |      |      |      |      |      |      |
|---------------|------|------|------|------|------|------|------|------|
| <i>yeaW</i>   | 12.9 | 12.9 | 12.8 | 12.9 | 12.9 | 12.9 | 12.9 | 12.7 |
| <i>yeaX</i>   | 13.0 | 12.9 | 12.9 | 13.0 | 13.1 | 13.0 | 13.0 | 12.9 |
| <i>yeaY</i>   | 15.1 | 15.0 | 14.8 | 14.7 | 15.1 | 14.8 | 14.7 | 14.9 |
| <i>yeaZ</i>   | 15.2 | 15.0 | 15.0 | 14.9 | 14.9 | 14.8 | 14.8 | 15.0 |
| <i>yebA</i>   | 14.9 | 14.7 | 14.7 | 14.6 | 14.5 | 14.7 | 14.5 | 14.6 |
| <i>yebB</i>   | 12.8 | 12.8 | 12.8 | 12.9 | 12.9 | 12.9 | 12.8 | 12.8 |
| <i>yebC</i>   | 17.5 | 17.6 | 17.3 | 17.5 | 17.9 | 17.8 | 17.7 | 17.7 |
| <i>yebE</i>   | 14.2 | 14.1 | 13.9 | 13.7 | 14.2 | 14.4 | 13.9 | 14.1 |
| <i>yebF</i>   | 17.4 | 17.2 | 17.0 | 17.0 | 15.8 | 16.1 | 15.3 | 16.0 |
| <i>yebG</i>   | 16.3 | 16.9 | 16.5 | 15.8 | 16.0 | 16.4 | 15.6 | 16.0 |
| <i>yebK</i>   | 15.6 | 15.2 | 15.0 | 15.1 | 15.6 | 15.8 | 15.5 | 15.8 |
| <i>mntP</i>   | 14.0 | 13.0 | 13.0 | 13.5 | 13.3 | 13.2 | 13.0 | 13.5 |
| <i>yebO</i>   | 16.3 | 16.4 | 15.5 | 16.3 | 15.6 | 16.1 | 15.2 | 15.9 |
| <i>yebQ</i>   | 13.0 | 13.3 | 13.0 | 13.1 | 12.9 | 13.1 | 12.9 | 12.9 |
| <i>yebR</i>   | 17.7 | 17.7 | 17.1 | 17.5 | 17.4 | 17.7 | 17.0 | 17.1 |
| <i>yebS</i>   | 14.0 | 14.1 | 13.6 | 13.4 | 13.8 | 14.1 | 13.6 | 13.8 |
| <i>yebT</i>   | 14.2 | 14.2 | 14.0 | 14.1 | 14.1 | 14.2 | 14.0 | 14.0 |
| <i>yebV</i>   | 16.7 | 16.7 | 16.5 | 16.2 | 17.0 | 16.9 | 16.4 | 17.4 |
| <i>yebW</i>   | 15.9 | 16.1 | 15.4 | 15.4 | 16.0 | 16.4 | 15.5 | 16.0 |
| <i>yebY</i>   | 16.7 | 16.6 | 16.1 | 16.5 | 15.7 | 16.1 | 15.5 | 15.6 |
| <i>yebZ</i>   | 16.3 | 16.3 | 16.0 | 16.3 | 15.1 | 15.4 | 14.9 | 15.0 |
| <i>yecA</i>   | 15.8 | 15.9 | 15.4 | 15.5 | 16.1 | 16.1 | 15.7 | 15.9 |
| <i>yecC</i>   | 15.4 | 15.5 | 15.1 | 15.4 | 15.2 | 15.5 | 15.2 | 15.4 |
| <i>yecD</i>   | 15.5 | 15.5 | 15.2 | 15.1 | 15.4 | 15.7 | 15.6 | 15.5 |
| <i>yecE</i>   | 14.1 | 14.0 | 13.8 | 13.7 | 13.6 | 14.2 | 14.0 | 14.0 |
| <i>yecF</i>   | 15.3 | 14.8 | 14.8 | 14.2 | 14.5 | 15.3 | 14.2 | 14.7 |
| <i>yecH</i>   | 13.5 | 13.4 | 13.2 | 12.9 | 15.7 | 16.3 | 15.3 | 15.6 |
| <i>yecJ</i>   | 17.4 | 17.5 | 16.4 | 17.4 | 15.7 | 16.5 | 15.2 | 16.1 |
| <i>yecM</i>   | 15.4 | 15.4 | 15.1 | 15.1 | 15.3 | 15.6 | 15.1 | 15.4 |
| <i>yecN</i>   | 16.9 | 16.9 | 16.4 | 16.4 | 16.5 | 17.1 | 16.5 | 16.7 |
| <i>yecR</i>   | 13.1 | 13.4 | 13.1 | 13.1 | 13.0 | 13.2 | 13.0 | 12.8 |
| <i>yecS</i>   | 16.1 | 16.3 | 15.9 | 16.0 | 15.9 | 16.4 | 16.1 | 16.3 |
| <i>yecT</i>   | 13.2 | 13.2 | 12.8 | 13.1 | 13.2 | 13.1 | 12.7 | 12.8 |
| <i>yedA</i>   | 13.2 | 13.9 | 13.3 | 13.2 | 13.4 | 13.3 | 13.1 | 13.0 |
| <i>yedD</i>   | 16.5 | 16.2 | 16.5 | 16.2 | 16.8 | 16.3 | 16.6 | 16.4 |
| <i>yedE</i>   | 16.0 | 15.8 | 16.3 | 15.8 | 16.6 | 16.3 | 16.7 | 16.6 |
| <i>yedF</i>   | 15.5 | 15.4 | 15.5 | 15.5 | 15.9 | 15.9 | 16.0 | 16.2 |
| <i>yedI</i>   | 15.1 | 15.3 | 14.9 | 14.8 | 15.6 | 15.5 | 15.3 | 15.3 |
| <i>yedJ</i>   | 15.4 | 15.6 | 14.9 | 15.2 | 15.5 | 15.6 | 15.3 | 15.6 |
| <i>yedK</i>   | 13.5 | 13.4 | 13.3 | 13.3 | 13.5 | 13.6 | 13.5 | 13.5 |
| <i>yedL</i>   | 14.7 | 14.5 | 14.0 | 14.2 | 13.8 | 14.6 | 13.8 | 14.0 |
| <i>yedM</i>   | 12.9 | 12.8 | 12.6 | 12.9 | 12.8 | 12.9 | 12.6 | 12.9 |
| <i>yedN_1</i> | 12.7 | 12.8 | 12.6 | 12.9 | 12.8 | 12.8 | 12.6 | 12.9 |
| <i>yedN_2</i> | 13.0 | 13.0 | 12.9 | 13.4 | 13.0 | 13.0 | 12.8 | 13.2 |
| <i>yedP</i>   | 14.3 | 14.5 | 14.0 | 14.0 | 14.1 | 14.3 | 14.0 | 14.2 |
| <i>yedQ</i>   | 14.1 | 14.2 | 13.9 | 13.7 | 14.0 | 14.4 | 14.0 | 14.3 |
| <i>yedR</i>   | 15.4 | 15.4 | 15.3 | 14.8 | 15.7 | 15.7 | 15.6 | 15.5 |
| <i>yedS_1</i> | 13.9 | 13.5 | 14.0 | 14.0 | 14.2 | 13.6 | 13.7 | 13.3 |
| <i>yedS_2</i> | 13.5 | 13.4 | 13.2 | 13.3 | 13.2 | 13.5 | 13.3 | 13.3 |
| <i>yedS_3</i> | 14.7 | 15.0 | 15.4 | 15.0 | 15.4 | 14.2 | 15.1 | 13.7 |
| <i>yedV</i>   | 14.3 | 14.3 | 13.6 | 14.1 | 13.6 | 14.0 | 13.3 | 13.6 |
| <i>yedW</i>   | 14.9 | 15.0 | 14.4 | 14.7 | 14.6 | 14.9 | 14.1 | 14.3 |
| <i>yedX</i>   | 13.6 | 13.6 | 13.4 | 13.2 | 13.2 | 13.5 | 13.0 | 12.9 |
| <i>yedY</i>   | 14.1 | 14.0 | 13.8 | 13.6 | 13.8 | 14.2 | 13.9 | 14.0 |
| <i>yedZ</i>   | 13.8 | 13.8 | 13.6 | 13.2 | 13.6 | 13.9 | 13.7 | 13.8 |
| <i>yeeA</i>   | 14.8 | 14.8 | 14.4 | 15.1 | 14.8 | 15.2 | 14.6 | 14.7 |
| <i>yeeD</i>   | 16.9 | 18.4 | 17.6 | 16.6 | 16.6 | 17.8 | 16.5 | 17.2 |
| <i>yeeE</i>   | 16.2 | 17.7 | 17.2 | 16.1 | 16.5 | 17.0 | 16.4 | 16.6 |
| <i>yeeF</i>   | 16.8 | 16.6 | 17.0 | 16.8 | 15.5 | 15.6 | 15.6 | 15.8 |
| <i>yeeJ</i>   | 13.2 | 13.2 | 13.0 | 13.2 | 13.2 | 13.2 | 13.0 | 13.0 |
| <i>yeeL_1</i> | 13.6 | 13.7 | 13.1 | 13.9 | 14.1 | 13.8 | 13.6 | 13.0 |

|        |      |      |      |      |      |      |      |      |
|--------|------|------|------|------|------|------|------|------|
| yeeL_2 | 12.9 | 12.8 | 12.7 | 13.8 | 12.9 | 12.9 | 12.7 | 12.7 |
| yeeN   | 17.2 | 17.2 | 16.6 | 16.9 | 17.0 | 17.2 | 16.4 | 16.7 |
| yeeO   | 13.5 | 13.5 | 13.4 | 13.6 | 13.8 | 13.9 | 13.7 | 13.7 |
| yeeP   | 12.8 | 12.8 | 12.8 | 13.4 | 12.9 | 12.9 | 13.0 | 12.9 |
| yeeR   | 13.8 | 13.4 | 13.2 | 13.6 | 13.5 | 13.3 | 13.3 | 13.2 |
| yeeS   | 13.0 | 12.8 | 12.8 | 13.3 | 13.2 | 12.8 | 13.1 | 12.6 |
| yeeT   | 12.9 | 12.8 | 12.8 | 12.9 | 12.9 | 12.9 | 12.9 | 12.9 |
| yeeU   | 12.7 | 12.7 | 12.6 | 13.3 | 12.7 | 12.7 | 12.6 | 12.7 |
| yeeV   | 12.7 | 12.8 | 12.6 | 12.7 | 12.8 | 12.7 | 12.7 | 12.7 |
| yeeW   | 13.8 | 13.8 | 13.6 | 13.4 | 13.7 | 14.0 | 13.6 | 13.5 |
| yeeX   | 18.9 | 18.9 | 18.5 | 18.6 | 19.2 | 19.6 | 19.2 | 19.1 |
| yeeY   | 13.8 | 13.9 | 13.5 | 13.4 | 13.7 | 14.1 | 13.7 | 13.9 |
| yeeZ   | 16.4 | 16.5 | 16.3 | 16.2 | 16.7 | 17.0 | 16.7 | 16.8 |
| yefM   | 16.8 | 17.0 | 16.2 | 16.3 | 16.9 | 17.2 | 16.3 | 16.7 |
| yegD   | 13.5 | 13.4 | 13.3 | 13.5 | 13.2 | 13.3 | 13.2 | 13.0 |
| yegE   | 13.8 | 13.9 | 13.6 | 13.5 | 13.5 | 13.8 | 13.3 | 13.4 |
| yegH   | 14.7 | 14.9 | 14.6 | 14.3 | 14.8 | 15.4 | 15.1 | 15.0 |
| yegI   | 13.1 | 13.1 | 12.9 | 13.5 | 13.2 | 13.1 | 13.0 | 12.9 |
| yegJ   | 13.2 | 13.1 | 13.0 | 13.4 | 13.1 | 13.1 | 13.0 | 12.9 |
| yegK   | 12.9 | 13.0 | 12.9 | 13.5 | 13.5 | 12.9 | 13.2 | 12.7 |
| yegL   | 12.8 | 12.9 | 12.8 | 13.0 | 13.0 | 12.8 | 12.8 | 12.6 |
| yegP   | 17.4 | 17.7 | 16.7 | 17.2 | 16.9 | 17.1 | 16.2 | 17.2 |
| yegQ   | 15.6 | 15.6 | 15.7 | 15.5 | 15.1 | 15.2 | 15.2 | 15.2 |
| yegR   | 13.7 | 13.5 | 13.4 | 13.5 | 13.3 | 13.5 | 13.2 | 14.1 |
| yegS   | 14.8 | 14.9 | 14.3 | 14.3 | 14.5 | 14.6 | 14.1 | 14.4 |
| yegT   | 13.2 | 13.1 | 13.0 | 13.1 | 13.2 | 13.3 | 13.1 | 13.2 |
| yegU   | 13.4 | 13.4 | 13.3 | 13.2 | 13.3 | 13.5 | 13.6 | 13.5 |
| yegV   | 13.1 | 13.1 | 13.0 | 13.4 | 13.0 | 13.2 | 13.2 | 13.0 |
| yegW   | 14.6 | 14.6 | 14.2 | 14.2 | 14.6 | 14.9 | 14.4 | 14.5 |
| yegX   | 14.3 | 14.5 | 13.9 | 14.1 | 14.1 | 14.4 | 14.0 | 14.1 |
| yegZ   | 13.3 | 13.2 | 13.2 | 13.8 | 13.3 | 13.3 | 13.2 | 13.1 |
| yehA   | 12.7 | 12.7 | 12.6 | 13.1 | 12.8 | 12.8 | 12.6 | 12.6 |
| yehB   | 12.8 | 12.8 | 12.6 | 13.1 | 12.9 | 12.9 | 12.8 | 12.7 |
| yehC   | 12.6 | 12.6 | 12.5 | 12.8 | 12.8 | 12.8 | 12.6 | 12.7 |
| yehD   | 12.8 | 12.8 | 12.6 | 12.8 | 13.5 | 14.1 | 13.5 | 13.3 |
| yehE   | 16.4 | 16.5 | 15.7 | 15.7 | 15.9 | 16.4 | 15.4 | 16.2 |
| yehI   | 13.0 | 13.0 | 12.8 | 13.1 | 12.9 | 13.0 | 12.9 | 12.9 |
| yehK   | 12.7 | 12.7 | 12.6 | 13.0 | 12.8 | 12.7 | 12.5 | 12.6 |
| yehL   | 12.8 | 12.9 | 12.7 | 12.7 | 12.8 | 12.8 | 12.8 | 12.6 |
| yehM   | 12.8 | 12.7 | 12.6 | 12.9 | 12.8 | 12.7 | 12.7 | 12.6 |
| yehP   | 12.9 | 12.9 | 12.7 | 13.3 | 12.9 | 12.9 | 12.8 | 12.8 |
| yehQ   | 12.9 | 12.9 | 12.8 | 13.0 | 13.6 | 12.9 | 12.9 | 12.8 |
| yehR   | 13.2 | 12.9 | 12.8 | 13.2 | 12.9 | 13.0 | 12.9 | 12.9 |
| yehS   | 14.9 | 15.0 | 14.4 | 14.7 | 14.4 | 15.0 | 14.3 | 14.7 |
| yehT   | 14.4 | 14.3 | 14.3 | 14.1 | 14.3 | 14.4 | 14.2 | 14.1 |
| yehU   | 13.9 | 13.8 | 13.9 | 13.8 | 13.6 | 13.8 | 13.6 | 13.5 |
| yehW   | 13.6 | 13.6 | 13.4 | 13.2 | 13.7 | 13.5 | 13.5 | 13.5 |
| yehX   | 14.0 | 14.0 | 13.6 | 13.9 | 13.8 | 13.8 | 13.6 | 13.9 |
| yehY   | 13.7 | 13.7 | 13.5 | 13.9 | 13.6 | 13.5 | 13.5 | 13.5 |
| yeiB   | 14.9 | 15.3 | 14.9 | 14.6 | 13.9 | 14.3 | 14.0 | 14.1 |
| yeiE   | 14.2 | 14.3 | 14.0 | 14.0 | 13.9 | 14.0 | 14.0 | 14.1 |
| yeiG   | 16.4 | 16.0 | 16.2 | 16.2 | 15.7 | 15.9 | 15.8 | 15.7 |
| yeiH   | 13.9 | 14.4 | 13.7 | 14.0 | 13.8 | 14.0 | 13.9 | 13.9 |
| yeiI   | 14.2 | 14.4 | 14.1 | 14.1 | 14.0 | 14.2 | 14.1 | 14.2 |
| yeiL   | 13.0 | 12.9 | 12.8 | 13.0 | 12.9 | 13.0 | 12.8 | 12.8 |
| yeiM   | 13.0 | 13.1 | 12.9 | 13.4 | 13.1 | 13.2 | 13.1 | 13.1 |
| yeiP   | 17.0 | 17.0 | 16.9 | 16.9 | 16.7 | 16.7 | 16.5 | 16.5 |
| yeiQ   | 13.7 | 13.4 | 13.4 | 13.3 | 12.9 | 13.0 | 12.8 | 12.8 |
| yeiR   | 14.3 | 14.5 | 14.4 | 14.1 | 13.9 | 14.1 | 14.0 | 14.0 |
| yeiS   | 15.0 | 14.7 | 14.4 | 14.3 | 14.8 | 14.7 | 14.2 | 14.9 |
| yeiW   | 13.0 | 13.1 | 12.9 | 13.0 | 12.9 | 13.0 | 12.8 | 12.9 |

|               |      |      |      |      |      |      |      |      |
|---------------|------|------|------|------|------|------|------|------|
| <i>yejA</i>   | 14.1 | 14.1 | 13.9 | 14.6 | 14.0 | 14.3 | 13.8 | 14.1 |
| <i>yejB</i>   | 13.7 | 13.7 | 13.6 | 13.2 | 13.6 | 13.8 | 13.6 | 13.7 |
| <i>yejE</i>   | 13.7 | 13.7 | 13.6 | 13.3 | 13.5 | 13.8 | 13.6 | 13.8 |
| <i>yejF</i>   | 14.1 | 14.1 | 13.8 | 13.7 | 13.8 | 14.1 | 13.8 | 14.1 |
| <i>yejG</i>   | 16.0 | 16.1 | 15.7 | 15.6 | 13.5 | 13.8 | 13.4 | 13.6 |
| <i>yejH</i>   | 14.0 | 13.9 | 13.7 | 13.5 | 13.7 | 14.0 | 13.7 | 13.8 |
| <i>yejK</i>   | 16.5 | 16.5 | 16.1 | 16.3 | 16.0 | 16.4 | 16.0 | 16.0 |
| <i>yejL</i>   | 17.1 | 17.2 | 17.0 | 16.9 | 16.8 | 17.3 | 17.1 | 17.0 |
| <i>yejM</i>   | 15.0 | 15.0 | 14.9 | 14.7 | 14.8 | 15.3 | 15.1 | 15.2 |
| <i>yejO</i>   | 14.1 | 14.2 | 13.8 | 13.7 | 14.2 | 14.4 | 13.9 | 14.0 |
| <i>yfaA</i>   | 12.9 | 12.8 | 12.7 | 13.1 | 13.1 | 12.9 | 12.8 | 12.8 |
| <i>yfaD</i>   | 14.9 | 15.2 | 14.6 | 14.9 | 14.9 | 15.2 | 14.6 | 15.0 |
| <i>yfaE</i>   | 15.0 | 15.0 | 15.1 | 15.0 | 14.1 | 14.4 | 14.6 | 14.3 |
| <i>yfaH</i>   | 12.8 | 12.9 | 12.7 | 13.4 | 12.8 | 12.7 | 12.7 | 12.8 |
| <i>yfaL</i>   | 13.5 | 13.5 | 13.3 | 13.5 | 13.7 | 13.7 | 13.6 | 13.5 |
| <i>yfaP</i>   | 12.8 | 12.9 | 12.7 | 12.9 | 12.9 | 12.8 | 12.8 | 12.8 |
| <i>yfaQ</i>   | 12.7 | 12.7 | 12.6 | 12.9 | 12.9 | 12.8 | 12.8 | 12.7 |
| <i>yfaS_1</i> | 12.7 | 12.7 | 12.6 | 12.9 | 12.8 | 12.7 | 12.7 | 12.6 |
| <i>yfaS_2</i> | 13.1 | 13.0 | 12.9 | 13.3 | 13.1 | 13.2 | 13.1 | 12.9 |
| <i>yfaT</i>   | 12.7 | 12.6 | 12.6 | 12.9 | 12.8 | 12.6 | 12.8 | 12.5 |
| <i>yfaU</i>   | 13.3 | 13.4 | 13.2 | 13.0 | 13.4 | 13.4 | 13.4 | 13.1 |
| <i>yfaV</i>   | 13.1 | 13.2 | 13.0 | 13.2 | 13.2 | 13.2 | 13.1 | 13.0 |
| <i>yfaW</i>   | 12.8 | 12.8 | 12.7 | 13.2 | 12.8 | 12.7 | 12.7 | 12.7 |
| <i>yfaX</i>   | 12.7 | 12.7 | 12.6 | 13.0 | 12.8 | 12.7 | 12.6 | 12.6 |
| <i>yfaY</i>   | 14.7 | 14.8 | 14.6 | 14.4 | 14.8 | 15.1 | 15.0 | 15.0 |
| <i>yfaZ</i>   | 14.5 | 14.0 | 14.1 | 13.9 | 14.0 | 13.8 | 13.8 | 13.9 |
| <i>yfbK</i>   | 12.8 | 12.8 | 12.7 | 13.0 | 12.8 | 12.8 | 12.7 | 12.6 |
| <i>yfbL</i>   | 12.7 | 12.7 | 12.6 | 12.9 | 12.7 | 12.8 | 12.7 | 12.7 |
| <i>yfbM</i>   | 12.8 | 12.8 | 12.7 | 12.8 | 13.3 | 13.5 | 13.2 | 13.2 |
| <i>yfbN</i>   | 12.9 | 12.9 | 12.6 | 13.6 | 12.8 | 12.8 | 12.6 | 12.7 |
| <i>yfbO</i>   | 13.3 | 13.1 | 13.0 | 13.1 | 13.1 | 13.2 | 12.9 | 12.9 |
| <i>yfbP</i>   | 13.3 | 13.2 | 13.1 | 13.1 | 13.1 | 13.3 | 13.0 | 13.0 |
| <i>yfbR</i>   | 14.9 | 15.0 | 14.6 | 14.4 | 14.4 | 15.1 | 14.5 | 14.8 |
| <i>yfbS</i>   | 13.7 | 13.6 | 13.4 | 13.6 | 14.2 | 14.3 | 14.3 | 14.3 |
| <i>yfbT</i>   | 16.0 | 16.1 | 16.0 | 15.8 | 16.6 | 16.6 | 16.7 | 16.6 |
| <i>yfbU</i>   | 17.9 | 18.0 | 17.5 | 17.6 | 18.4 | 18.6 | 18.3 | 18.1 |
| <i>yfbV</i>   | 16.1 | 15.6 | 15.8 | 15.6 | 16.1 | 16.1 | 16.0 | 16.1 |
| <i>yfcA</i>   | 15.4 | 15.3 | 15.1 | 15.2 | 15.5 | 15.4 | 15.3 | 15.3 |
| <i>yfcC</i>   | 12.6 | 12.7 | 12.6 | 12.8 | 13.7 | 13.7 | 14.0 | 13.9 |
| <i>yfcD</i>   | 16.9 | 16.7 | 16.6 | 16.5 | 16.4 | 16.5 | 16.3 | 16.4 |
| <i>yfcE</i>   | 16.5 | 16.6 | 16.2 | 16.6 | 16.4 | 16.4 | 16.1 | 16.4 |
| <i>yfcF</i>   | 14.8 | 14.9 | 14.4 | 14.5 | 14.5 | 14.7 | 14.2 | 14.7 |
| <i>yfcG</i>   | 14.5 | 14.4 | 14.0 | 13.8 | 14.0 | 14.2 | 13.7 | 14.1 |
| <i>yfcH</i>   | 16.0 | 15.8 | 15.8 | 16.0 | 15.1 | 15.6 | 15.3 | 15.3 |
| <i>yfcI</i>   | 13.6 | 13.7 | 13.3 | 13.3 | 13.4 | 13.8 | 13.2 | 13.2 |
| <i>yfcJ</i>   | 13.2 | 13.2 | 13.1 | 13.1 | 13.2 | 13.2 | 13.3 | 13.1 |
| <i>yfcL</i>   | 15.9 | 15.8 | 15.3 | 15.8 | 14.8 | 15.4 | 14.8 | 15.3 |
| <i>yfcM</i>   | 15.6 | 15.6 | 15.4 | 15.3 | 15.8 | 15.6 | 15.5 | 15.7 |
| <i>yfcN</i>   | 14.9 | 15.0 | 14.7 | 14.9 | 15.4 | 15.5 | 15.1 | 15.5 |
| <i>yfcO</i>   | 14.7 | 14.8 | 14.4 | 14.2 | 14.8 | 15.0 | 14.5 | 14.7 |
| <i>yfcP</i>   | 12.9 | 12.9 | 12.8 | 13.5 | 12.9 | 13.0 | 12.9 | 13.2 |
| <i>yfcQ</i>   | 12.8 | 12.9 | 12.7 | 13.1 | 12.8 | 13.0 | 12.8 | 13.1 |
| <i>yfcR</i>   | 12.8 | 12.9 | 12.7 | 13.0 | 12.9 | 12.9 | 12.9 | 12.8 |
| <i>yfcS</i>   | 12.6 | 12.6 | 12.6 | 12.8 | 12.7 | 12.9 | 12.7 | 12.7 |
| <i>yfcT</i>   | 12.8 | 12.9 | 12.7 | 13.2 | 13.0 | 12.8 | 12.9 | 12.6 |
| <i>yfcU</i>   | 13.1 | 13.1 | 12.9 | 13.0 | 13.3 | 13.4 | 13.2 | 13.1 |
| <i>yfcV</i>   | 12.6 | 12.7 | 12.5 | 12.8 | 12.8 | 12.7 | 12.6 | 12.7 |
| <i>yfcZ</i>   | 15.2 | 15.1 | 14.8 | 14.7 | 16.0 | 16.5 | 15.7 | 16.7 |
| <i>yfdC</i>   | 14.1 | 14.1 | 13.8 | 13.9 | 13.9 | 13.9 | 13.7 | 13.8 |
| <i>yfdE</i>   | 12.8 | 12.8 | 12.7 | 12.8 | 12.8 | 12.9 | 12.7 | 12.7 |
| <i>yfdF</i>   | 12.8 | 12.8 | 12.6 | 12.8 | 12.7 | 12.7 | 12.5 | 12.5 |

|             |      |      |      |      |      |      |      |      |
|-------------|------|------|------|------|------|------|------|------|
| <i>yfdG</i> | 16.4 | 16.4 | 15.9 | 16.0 | 15.8 | 16.0 | 15.6 | 16.1 |
| <i>yfdH</i> | 17.0 | 16.8 | 16.3 | 16.8 | 16.6 | 16.3 | 15.7 | 16.0 |
| <i>yfdI</i> | 15.6 | 15.4 | 15.3 | 15.9 | 14.9 | 14.2 | 13.9 | 14.3 |
| <i>yfdK</i> | 13.2 | 13.3 | 13.1 | 13.7 | 13.3 | 13.6 | 13.1 | 13.1 |
| <i>yfdL</i> | 12.8 | 12.8 | 12.7 | 13.1 | 12.9 | 12.8 | 12.7 | 12.7 |
| <i>yfdM</i> | 12.8 | 12.8 | 12.7 | 13.1 | 12.9 | 12.7 | 12.8 | 12.7 |
| <i>yfdN</i> | 12.6 | 12.6 | 12.5 | 12.8 | 12.7 | 12.6 | 12.7 | 12.6 |
| <i>yfdO</i> | 12.9 | 12.9 | 12.8 | 13.1 | 13.0 | 12.8 | 13.0 | 12.9 |
| <i>yfdP</i> | 13.0 | 13.1 | 12.9 | 13.2 | 13.1 | 13.1 | 12.9 | 12.9 |
| <i>yfdQ</i> | 13.4 | 13.5 | 13.1 | 13.3 | 13.2 | 13.7 | 13.2 | 13.1 |
| <i>yfdR</i> | 12.7 | 12.7 | 12.5 | 12.9 | 12.8 | 12.7 | 12.6 | 12.7 |
| <i>yfdS</i> | 13.2 | 13.2 | 12.9 | 15.5 | 13.7 | 13.0 | 13.2 | 12.8 |
| <i>yfdT</i> | 13.0 | 13.1 | 12.8 | 12.9 | 13.0 | 13.1 | 12.8 | 12.9 |
| <i>yfdV</i> | 12.7 | 12.9 | 12.7 | 12.7 | 13.1 | 12.8 | 12.6 | 12.6 |
| <i>yfdX</i> | 13.4 | 13.3 | 13.1 | 13.4 | 13.3 | 13.6 | 13.0 | 12.9 |
| <i>yfdY</i> | 15.8 | 15.8 | 15.5 | 15.1 | 15.8 | 16.3 | 15.6 | 16.2 |
| <i>yfeA</i> | 14.3 | 14.2 | 13.9 | 13.8 | 14.0 | 14.4 | 13.9 | 14.2 |
| <i>yfeC</i> | 14.7 | 14.5 | 14.4 | 14.0 | 15.0 | 15.2 | 14.7 | 14.6 |
| <i>yfeD</i> | 14.9 | 14.8 | 14.4 | 14.6 | 14.7 | 15.3 | 14.6 | 14.8 |
| <i>yfeH</i> | 14.3 | 14.4 | 14.1 | 14.0 | 14.1 | 14.4 | 14.1 | 14.4 |
| <i>yfeK</i> | 14.3 | 14.7 | 14.1 | 13.7 | 14.5 | 14.3 | 14.0 | 14.4 |
| <i>yfeN</i> | 13.3 | 13.3 | 13.0 | 13.0 | 13.1 | 13.3 | 13.0 | 13.2 |
| <i>yfeO</i> | 13.2 | 13.2 | 13.1 | 12.8 | 13.1 | 13.3 | 13.2 | 13.3 |
| <i>yfeR</i> | 13.4 | 13.4 | 13.2 | 13.4 | 13.3 | 13.4 | 13.3 | 13.2 |
| <i>yfeS</i> | 13.7 | 13.7 | 13.3 | 13.2 | 13.7 | 13.6 | 13.3 | 13.5 |
| <i>yfeW</i> | 13.2 | 13.2 | 13.1 | 13.4 | 13.2 | 13.3 | 13.2 | 13.1 |
| <i>yfeX</i> | 15.2 | 15.0 | 15.4 | 14.8 | 16.3 | 15.7 | 16.2 | 16.1 |
| <i>yfeY</i> | 15.5 | 15.6 | 15.2 | 15.1 | 15.7 | 15.5 | 15.3 | 15.6 |
| <i>yfeZ</i> | 15.3 | 15.3 | 15.0 | 15.2 | 15.2 | 15.2 | 15.2 | 15.5 |
| <i>yffB</i> | 16.2 | 16.1 | 15.9 | 15.8 | 16.0 | 16.3 | 15.9 | 15.9 |
| <i>yffL</i> | 14.0 | 13.9 | 13.6 | 13.8 | 13.7 | 13.9 | 13.3 | 13.3 |
| <i>yffM</i> | 13.0 | 13.1 | 12.9 | 13.0 | 12.9 | 13.1 | 12.9 | 13.0 |
| <i>yffN</i> | 13.2 | 13.2 | 13.0 | 13.6 | 13.1 | 13.3 | 13.1 | 13.1 |
| <i>yffO</i> | 13.9 | 13.9 | 13.5 | 13.9 | 13.7 | 13.9 | 13.6 | 13.6 |
| <i>yffP</i> | 13.5 | 13.5 | 13.3 | 13.2 | 13.3 | 13.5 | 13.4 | 13.3 |
| <i>yffQ</i> | 14.2 | 13.7 | 13.8 | 13.9 | 13.8 | 13.9 | 13.6 | 13.5 |
| <i>yffR</i> | 15.4 | 15.1 | 15.1 | 15.1 | 15.2 | 15.4 | 14.8 | 15.1 |
| <i>yffS</i> | 15.5 | 15.5 | 15.2 | 15.5 | 15.8 | 15.5 | 15.0 | 15.1 |
| <i>yfgC</i> | 15.7 | 15.7 | 15.6 | 15.5 | 15.8 | 15.9 | 15.7 | 15.8 |
| <i>yfgD</i> | 16.2 | 16.2 | 16.0 | 15.8 | 15.8 | 15.8 | 15.4 | 15.9 |
| <i>yfgF</i> | 12.8 | 12.8 | 12.6 | 12.8 | 12.9 | 13.1 | 12.9 | 12.9 |
| <i>yfgG</i> | 16.7 | 16.6 | 16.4 | 15.9 | 16.3 | 16.9 | 15.9 | 16.4 |
| <i>yfgH</i> | 13.1 | 13.1 | 12.9 | 13.1 | 13.0 | 13.1 | 12.9 | 12.9 |
| <i>yfgI</i> | 13.2 | 13.3 | 13.0 | 13.4 | 13.2 | 13.4 | 13.0 | 13.0 |
| <i>yfgJ</i> | 14.6 | 14.5 | 14.5 | 14.5 | 14.3 | 14.7 | 14.5 | 14.8 |
| <i>yfgM</i> | 17.9 | 17.8 | 17.3 | 17.8 | 17.8 | 17.8 | 17.3 | 17.6 |
| <i>yfgO</i> | 14.7 | 14.7 | 14.6 | 14.1 | 14.6 | 15.1 | 14.8 | 15.0 |
| <i>yfhG</i> | 15.0 | 15.0 | 14.8 | 14.9 | 14.7 | 15.3 | 15.1 | 15.0 |
| <i>yfhH</i> | 14.3 | 14.4 | 14.0 | 13.9 | 14.3 | 14.7 | 14.2 | 14.5 |
| <i>yfhL</i> | 15.3 | 15.1 | 14.9 | 14.5 | 15.6 | 16.0 | 15.0 | 15.3 |
| <i>yfhM</i> | 14.8 | 14.8 | 14.5 | 14.4 | 14.8 | 14.9 | 14.8 | 14.9 |
| <i>yfhR</i> | 12.8 | 12.7 | 12.6 | 13.0 | 12.7 | 12.7 | 12.7 | 12.7 |
| <i>yfiB</i> | 15.1 | 15.0 | 14.6 | 15.0 | 14.7 | 14.9 | 14.6 | 14.5 |
| <i>yfiC</i> | 14.5 | 14.4 | 14.1 | 13.8 | 14.4 | 14.6 | 14.3 | 14.3 |
| <i>yfiD</i> | 16.5 | 15.5 | 16.3 | 16.5 | 17.1 | 17.8 | 17.1 | 17.1 |
| <i>yfiE</i> | 13.7 | 13.7 | 13.5 | 13.1 | 13.5 | 13.7 | 13.4 | 13.4 |
| <i>yfiF</i> | 15.6 | 15.6 | 15.3 | 15.6 | 15.3 | 15.3 | 14.9 | 15.1 |
| <i>yfiH</i> | 15.2 | 15.2 | 15.2 | 14.9 | 15.2 | 15.0 | 15.0 | 15.2 |
| <i>yfiL</i> | 13.8 | 13.8 | 13.4 | 13.3 | 13.5 | 13.8 | 13.2 | 13.4 |
| <i>yfiM</i> | 13.5 | 13.3 | 13.3 | 13.5 | 13.4 | 13.5 | 13.4 | 13.2 |
| <i>yfiN</i> | 14.1 | 14.1 | 13.6 | 13.6 | 13.5 | 14.2 | 13.5 | 13.6 |

|               |      |      |      |      |      |      |      |      |
|---------------|------|------|------|------|------|------|------|------|
| <i>yfiP</i>   | 14.0 | 13.9 | 13.7 | 13.5 | 13.5 | 14.0 | 13.7 | 13.8 |
| <i>yfiQ</i>   | 14.1 | 14.0 | 13.9 | 13.7 | 14.0 | 14.1 | 13.9 | 13.9 |
| <i>yfiR</i>   | 14.9 | 14.8 | 14.4 | 14.0 | 14.6 | 15.3 | 14.4 | 14.6 |
| <i>yfiD</i>   | 14.6 | 14.8 | 14.3 | 14.6 | 14.4 | 15.0 | 14.5 | 14.7 |
| <i>yfiF</i>   | 15.9 | 15.9 | 15.2 | 15.8 | 15.2 | 15.6 | 14.9 | 15.2 |
| <i>yfiG</i>   | 15.9 | 15.8 | 15.6 | 15.3 | 15.6 | 15.6 | 15.2 | 15.3 |
| <i>yfiH</i>   | 13.8 | 13.7 | 13.3 | 13.7 | 14.0 | 14.2 | 13.6 | 13.6 |
| <i>yfiI</i>   | 13.1 | 13.0 | 12.9 | 14.3 | 13.1 | 13.1 | 12.9 | 12.9 |
| <i>yfiJ</i>   | 12.9 | 12.8 | 12.7 | 13.3 | 12.9 | 12.9 | 12.6 | 12.7 |
| <i>yfiK</i>   | 14.3 | 14.2 | 13.9 | 13.8 | 14.3 | 14.5 | 14.3 | 14.5 |
| <i>yfiL</i>   | 14.9 | 14.8 | 14.4 | 14.5 | 15.2 | 15.4 | 15.1 | 15.2 |
| <i>yfiM</i>   | 13.6 | 13.4 | 13.2 | 14.4 | 13.8 | 13.9 | 13.4 | 13.8 |
| <i>yfiP</i>   | 13.1 | 13.2 | 13.0 | 12.9 | 13.1 | 13.2 | 13.1 | 12.9 |
| <i>yfiQ</i>   | 12.9 | 12.9 | 12.8 | 13.4 | 12.9 | 12.8 | 12.9 | 12.7 |
| <i>yfiR</i>   | 12.7 | 12.7 | 12.6 | 12.9 | 12.8 | 12.7 | 12.8 | 12.6 |
| <i>yfiS</i>   | 13.1 | 13.1 | 13.0 | 13.3 | 13.1 | 13.2 | 13.0 | 12.8 |
| <i>yfiT</i>   | 13.0 | 13.1 | 13.0 | 13.3 | 13.0 | 13.0 | 13.0 | 12.9 |
| <i>yfiU</i>   | 14.3 | 14.3 | 13.6 | 13.8 | 13.9 | 14.3 | 13.8 | 14.1 |
| <i>yfiW</i>   | 13.7 | 13.7 | 13.4 | 13.6 | 13.6 | 13.7 | 13.3 | 13.4 |
| <i>yfiX</i>   | 12.6 | 12.6 | 12.5 | 13.0 | 12.7 | 12.6 | 12.6 | 12.9 |
| <i>yfiY</i>   | 12.9 | 12.7 | 12.7 | 13.5 | 12.9 | 12.8 | 12.9 | 12.7 |
| <i>yfiZ</i>   | 13.1 | 13.1 | 13.0 | 13.1 | 13.1 | 13.0 | 13.1 | 12.9 |
| <i>ygaC</i>   | 14.5 | 14.6 | 14.2 | 13.9 | 14.2 | 14.7 | 14.2 | 14.0 |
| <i>ygaD</i>   | 15.6 | 15.5 | 15.3 | 15.4 | 15.6 | 15.5 | 15.2 | 15.3 |
| <i>ygaH</i>   | 16.2 | 15.8 | 15.6 | 15.7 | 15.8 | 16.2 | 15.8 | 15.8 |
| <i>ygaM</i>   | 17.3 | 17.2 | 16.5 | 16.8 | 16.9 | 16.4 | 15.7 | 17.0 |
| <i>ygaP</i>   | 14.2 | 14.4 | 14.0 | 14.1 | 13.8 | 14.2 | 13.8 | 14.1 |
| <i>ygaQ_1</i> | 12.7 | 12.9 | 12.6 | 13.1 | 12.8 | 12.9 | 12.6 | 12.7 |
| <i>ygaQ_2</i> | 12.6 | 12.7 | 12.5 | 12.7 | 12.7 | 12.7 | 12.5 | 12.6 |
| <i>ygaQ_3</i> | 12.7 | 12.8 | 12.5 | 12.9 | 12.8 | 12.7 | 12.5 | 12.6 |
| <i>ygaQ_4</i> | 12.9 | 13.0 | 12.8 | 13.1 | 12.8 | 12.8 | 12.8 | 12.9 |
| <i>ygaU</i>   | 16.9 | 17.0 | 16.7 | 16.6 | 16.5 | 16.5 | 16.0 | 16.7 |
| <i>ygaV</i>   | 14.1 | 14.3 | 14.0 | 13.5 | 13.7 | 14.2 | 13.8 | 13.7 |
| <i>ygaW</i>   | 12.9 | 13.1 | 12.8 | 13.3 | 13.1 | 13.9 | 13.5 | 13.4 |
| <i>ygaX</i>   | 13.1 | 13.7 | 13.3 | 13.6 | 12.9 | 13.2 | 12.9 | 13.0 |
| <i>ygaY</i>   | 12.7 | 12.8 | 12.7 | 12.9 | 12.7 | 12.7 | 12.7 | 12.6 |
| <i>ygaZ</i>   | 15.7 | 15.3 | 15.4 | 15.2 | 15.6 | 15.6 | 15.5 | 15.8 |
| <i>ygbA</i>   | 13.4 | 13.4 | 13.1 | 13.6 | 13.5 | 13.2 | 13.1 | 13.0 |
| <i>ygbE</i>   | 15.9 | 16.0 | 15.4 | 15.7 | 15.4 | 16.4 | 15.5 | 15.7 |
| <i>ygbI</i>   | 14.5 | 14.6 | 14.1 | 14.3 | 14.3 | 14.5 | 14.1 | 14.2 |
| <i>ygbJ</i>   | 13.0 | 13.0 | 12.9 | 13.3 | 12.9 | 12.8 | 12.9 | 12.8 |
| <i>ygbK</i>   | 12.8 | 12.8 | 12.8 | 13.1 | 12.9 | 12.8 | 12.9 | 12.9 |
| <i>ygbL</i>   | 13.1 | 13.0 | 12.9 | 13.1 | 13.1 | 13.0 | 13.0 | 13.0 |
| <i>ygbM</i>   | 13.3 | 13.3 | 13.1 | 13.3 | 13.2 | 13.2 | 13.2 | 13.4 |
| <i>ygbN</i>   | 12.9 | 12.8 | 12.8 | 13.3 | 12.9 | 12.9 | 12.9 | 12.8 |
| <i>ygcE</i>   | 13.0 | 12.9 | 12.9 | 13.4 | 13.1 | 13.0 | 13.0 | 13.0 |
| <i>ygcF</i>   | 14.5 | 14.7 | 14.4 | 14.5 | 14.6 | 14.5 | 14.4 | 14.5 |
| <i>ygcG</i>   | 12.6 | 12.6 | 12.5 | 12.8 | 12.6 | 12.7 | 12.5 | 12.5 |
| <i>ygcN</i>   | 13.1 | 13.0 | 13.0 | 13.1 | 13.3 | 13.0 | 13.4 | 13.2 |
| <i>ygcO</i>   | 13.1 | 12.9 | 12.9 | 12.8 | 12.8 | 13.0 | 13.1 | 12.9 |
| <i>ygcP</i>   | 13.2 | 13.2 | 13.0 | 13.3 | 13.9 | 13.2 | 13.2 | 13.1 |
| <i>ygcQ</i>   | 13.2 | 13.3 | 13.0 | 13.9 | 13.6 | 13.1 | 13.3 | 12.9 |
| <i>ygcR</i>   | 13.1 | 13.1 | 13.1 | 13.9 | 13.5 | 13.1 | 13.3 | 12.8 |
| <i>ygcS</i>   | 12.8 | 12.7 | 12.7 | 13.2 | 13.1 | 12.8 | 12.9 | 12.7 |
| <i>ygcU</i>   | 13.0 | 13.0 | 12.9 | 13.6 | 13.1 | 13.0 | 12.9 | 12.8 |
| <i>ygcW</i>   | 12.7 | 12.7 | 12.6 | 13.0 | 12.7 | 12.7 | 12.6 | 12.4 |
| <i>ygdB</i>   | 13.5 | 13.5 | 13.1 | 13.5 | 13.3 | 13.6 | 13.3 | 13.2 |
| <i>ygdD</i>   | 15.6 | 15.5 | 15.4 | 15.1 | 15.6 | 15.8 | 15.5 | 15.6 |
| <i>ygdG</i>   | 13.9 | 14.0 | 13.7 | 13.7 | 13.9 | 14.0 | 13.8 | 14.0 |
| <i>ygdH</i>   | 16.0 | 15.9 | 15.9 | 15.9 | 15.7 | 15.8 | 15.9 | 15.9 |
| <i>ygdI</i>   | 15.7 | 15.8 | 15.1 | 15.0 | 14.7 | 15.0 | 13.9 | 14.7 |

|             |      |      |      |      |      |      |      |      |
|-------------|------|------|------|------|------|------|------|------|
| <i>ygdQ</i> | 14.3 | 14.3 | 14.1 | 13.7 | 13.9 | 14.5 | 14.0 | 14.4 |
| <i>ygdR</i> | 15.5 | 15.5 | 14.9 | 15.0 | 15.1 | 15.4 | 14.5 | 15.3 |
| <i>ygdT</i> | 13.2 | 13.2 | 13.2 | 15.5 | 13.3 | 13.3 | 13.1 | 13.3 |
| <i>ygeA</i> | 15.1 | 15.2 | 15.0 | 14.8 | 15.4 | 15.5 | 15.2 | 15.2 |
| <i>ygeF</i> | 12.6 | 12.6 | 12.5 | 12.8 | 12.6 | 12.6 | 12.4 | 13.2 |
| <i>ygeG</i> | 12.7 | 12.7 | 12.6 | 12.9 | 12.7 | 12.8 | 12.5 | 12.8 |
| <i>ygeH</i> | 12.6 | 12.6 | 12.4 | 13.0 | 12.7 | 12.6 | 12.4 | 12.5 |
| <i>ygeI</i> | 13.0 | 12.9 | 12.8 | 12.8 | 13.1 | 13.0 | 12.8 | 12.9 |
| <i>ygeK</i> | 12.9 | 12.9 | 12.6 | 13.4 | 12.9 | 13.0 | 12.7 | 12.7 |
| <i>ygeL</i> | 12.9 | 13.0 | 12.8 | 13.2 | 12.8 | 13.0 | 12.7 | 12.9 |
| <i>ygeM</i> | 12.7 | 12.7 | 12.6 | 12.9 | 12.8 | 12.6 | 12.5 | 12.6 |
| <i>ygeN</i> | 12.9 | 13.0 | 12.8 | 13.1 | 12.9 | 13.1 | 12.7 | 12.7 |
| <i>ygeO</i> | 13.6 | 13.6 | 13.2 | 13.5 | 13.6 | 13.4 | 13.1 | 13.4 |
| <i>ygeP</i> | 13.8 | 13.8 | 13.4 | 13.5 | 13.7 | 13.7 | 13.5 | 13.7 |
| <i>ygeQ</i> | 13.5 | 13.4 | 13.2 | 13.7 | 13.6 | 13.5 | 13.3 | 13.3 |
| <i>ygeR</i> | 15.5 | 15.6 | 15.3 | 15.4 | 15.8 | 15.8 | 15.4 | 15.5 |
| <i>ygeV</i> | 13.4 | 13.2 | 13.1 | 13.1 | 13.3 | 13.7 | 13.3 | 13.3 |
| <i>ygeW</i> | 12.6 | 12.6 | 12.5 | 12.8 | 12.8 | 12.6 | 12.6 | 12.7 |
| <i>ygeX</i> | 12.8 | 12.8 | 12.7 | 13.3 | 12.8 | 12.8 | 12.8 | 12.6 |
| <i>ygeY</i> | 13.0 | 12.9 | 12.8 | 13.3 | 12.9 | 13.0 | 12.9 | 12.9 |
| <i>ygfA</i> | 14.0 | 14.1 | 13.9 | 13.8 | 13.8 | 14.2 | 14.1 | 14.2 |
| <i>ygfB</i> | 17.5 | 17.5 | 17.1 | 17.5 | 17.7 | 17.5 | 17.6 | 17.3 |
| <i>ygfF</i> | 14.0 | 13.8 | 13.7 | 13.7 | 13.4 | 13.3 | 13.2 | 13.2 |
| <i>ygfI</i> | 13.6 | 13.6 | 13.1 | 13.5 | 13.5 | 13.6 | 13.3 | 13.5 |
| <i>ygfK</i> | 12.6 | 12.7 | 12.5 | 13.0 | 12.7 | 12.6 | 12.6 | 12.6 |
| <i>ygfM</i> | 12.9 | 12.9 | 12.8 | 13.2 | 12.8 | 12.8 | 12.9 | 12.6 |
| <i>ygfQ</i> | 13.0 | 12.9 | 13.1 | 13.0 | 13.1 | 12.9 | 13.0 | 12.8 |
| <i>ygfS</i> | 13.3 | 13.5 | 13.1 | 13.4 | 13.8 | 13.5 | 13.5 | 13.1 |
| <i>ygfT</i> | 12.8 | 12.8 | 12.7 | 13.0 | 13.0 | 12.8 | 12.9 | 12.8 |
| <i>ygfU</i> | 12.7 | 12.7 | 12.5 | 12.7 | 12.8 | 12.6 | 12.6 | 12.5 |
| <i>ygfX</i> | 15.3 | 14.6 | 15.1 | 15.0 | 15.4 | 14.6 | 15.2 | 15.3 |
| <i>ygfY</i> | 16.8 | 16.2 | 16.1 | 16.8 | 16.6 | 15.9 | 16.1 | 16.8 |
| <i>ygfZ</i> | 16.8 | 16.7 | 16.9 | 16.6 | 16.6 | 16.6 | 16.6 | 16.6 |
| <i>yggC</i> | 14.9 | 14.8 | 14.6 | 14.7 | 14.9 | 15.0 | 14.7 | 14.7 |
| <i>yggD</i> | 15.6 | 15.6 | 15.0 | 15.3 | 15.6 | 15.8 | 15.3 | 15.7 |
| <i>yggE</i> | 17.0 | 16.9 | 16.5 | 16.9 | 16.7 | 16.6 | 16.2 | 16.7 |
| <i>yggF</i> | 13.3 | 13.3 | 13.2 | 13.4 | 13.7 | 13.3 | 13.4 | 12.9 |
| <i>yggG</i> | 15.4 | 14.7 | 14.8 | 14.9 | 14.3 | 14.5 | 14.1 | 14.5 |
| <i>yggI</i> | 15.6 | 13.6 | 13.7 | 13.8 | 13.2 | 13.6 | 13.4 | 13.4 |
| <i>yggL</i> | 18.0 | 17.8 | 17.6 | 17.9 | 18.0 | 17.6 | 17.3 | 17.7 |
| <i>yggM</i> | 13.0 | 13.0 | 12.8 | 13.3 | 13.1 | 13.0 | 12.8 | 12.9 |
| <i>yggN</i> | 15.5 | 15.6 | 15.1 | 15.4 | 15.4 | 15.2 | 15.0 | 15.4 |
| <i>yggP</i> | 13.0 | 13.0 | 12.8 | 13.2 | 13.0 | 13.0 | 12.9 | 12.8 |
| <i>yggR</i> | 13.0 | 13.0 | 12.9 | 13.6 | 13.2 | 12.9 | 13.0 | 12.9 |
| <i>yggS</i> | 16.0 | 15.8 | 15.6 | 15.8 | 15.6 | 15.9 | 15.5 | 15.7 |
| <i>yggT</i> | 16.6 | 16.5 | 16.4 | 16.5 | 16.3 | 16.5 | 16.3 | 16.3 |
| <i>yggU</i> | 17.0 | 16.7 | 16.3 | 16.5 | 16.4 | 16.7 | 16.1 | 16.3 |
| <i>yggW</i> | 15.0 | 14.9 | 14.6 | 14.7 | 14.5 | 14.9 | 14.5 | 14.6 |
| <i>yggX</i> | 17.6 | 17.7 | 17.1 | 17.2 | 16.9 | 17.1 | 16.3 | 16.6 |
| <i>yghA</i> | 14.6 | 14.4 | 14.0 | 14.4 | 14.1 | 13.9 | 13.6 | 14.0 |
| <i>yghB</i> | 15.3 | 15.3 | 14.9 | 15.0 | 15.1 | 15.5 | 15.3 | 15.5 |
| <i>yghD</i> | 13.4 | 13.4 | 13.1 | 13.7 | 13.4 | 13.4 | 13.2 | 13.2 |
| <i>yghE</i> | 12.9 | 12.8 | 12.8 | 13.1 | 13.0 | 12.9 | 12.9 | 12.8 |
| <i>yghF</i> | 13.3 | 12.9 | 12.9 | 13.1 | 13.0 | 12.9 | 12.9 | 12.9 |
| <i>yghG</i> | 14.3 | 13.3 | 13.5 | 13.9 | 13.5 | 13.7 | 13.5 | 13.4 |
| <i>yghJ</i> | 14.2 | 13.4 | 13.7 | 13.9 | 13.7 | 13.6 | 13.6 | 13.6 |
| <i>yghO</i> | 13.0 | 13.0 | 12.9 | 13.2 | 13.0 | 12.9 | 12.9 | 13.1 |
| <i>yghQ</i> | 12.8 | 12.8 | 12.8 | 13.9 | 13.0 | 12.8 | 13.0 | 12.7 |
| <i>yghR</i> | 12.8 | 12.9 | 12.7 | 12.7 | 12.9 | 12.7 | 12.8 | 12.7 |
| <i>yghS</i> | 12.9 | 13.0 | 12.8 | 13.5 | 12.9 | 13.0 | 13.0 | 12.7 |
| <i>yghT</i> | 12.7 | 12.7 | 12.5 | 12.9 | 12.7 | 12.7 | 12.6 | 12.7 |



|               |      |      |      |      |      |      |      |      |
|---------------|------|------|------|------|------|------|------|------|
| <i>yghU</i>   | 16.0 | 16.1 | 15.9 | 15.8 | 16.2 | 16.2 | 16.1 | 16.1 |
| <i>yghW</i>   | 13.3 | 13.1 | 13.2 | 13.3 | 13.3 | 13.1 | 13.0 | 13.3 |
| <i>yghX_1</i> | 13.7 | 13.9 | 13.4 | 13.5 | 14.1 | 13.9 | 13.6 | 13.7 |
| <i>yghX_2</i> | 14.1 | 14.3 | 13.9 | 14.0 | 14.6 | 14.6 | 14.0 | 14.4 |
| <i>yghZ</i>   | 14.2 | 14.2 | 14.2 | 13.9 | 14.4 | 14.5 | 14.4 | 14.3 |
| <i>ygiA</i>   | 17.4 | 17.1 | 17.1 | 17.1 | 16.5 | 17.1 | 16.7 | 16.9 |
| <i>ygiB</i>   | 16.9 | 16.7 | 16.8 | 16.7 | 16.4 | 16.6 | 16.5 | 16.6 |
| <i>ygiC</i>   | 16.2 | 15.9 | 16.0 | 16.0 | 15.4 | 15.7 | 15.4 | 15.6 |
| <i>ygiD</i>   | 13.2 | 13.3 | 13.1 | 12.9 | 13.4 | 13.4 | 13.3 | 13.3 |
| <i>ygiF</i>   | 15.5 | 15.4 | 15.2 | 15.3 | 15.4 | 15.4 | 15.2 | 15.3 |
| <i>ygiH</i>   | 14.7 | 14.6 | 14.4 | 13.8 | 14.6 | 14.9 | 14.6 | 14.7 |
| <i>ygiL</i>   | 13.1 | 12.9 | 12.8 | 12.9 | 12.9 | 12.8 | 12.7 | 12.9 |
| <i>ygiM</i>   | 15.8 | 16.2 | 15.8 | 15.6 | 16.2 | 15.8 | 15.6 | 15.9 |
| <i>ygiN</i>   | 16.9 | 17.0 | 16.8 | 16.5 | 17.0 | 17.2 | 17.0 | 17.5 |
| <i>ygiQ</i>   | 15.2 | 14.3 | 15.0 | 14.9 | 14.9 | 14.2 | 14.9 | 15.0 |
| <i>ygiS</i>   | 14.1 | 14.0 | 14.1 | 13.9 | 14.0 | 14.1 | 14.1 | 14.1 |
| <i>ygiV</i>   | 14.0 | 13.9 | 14.0 | 13.8 | 13.9 | 14.0 | 14.0 | 14.0 |
| <i>ygiW</i>   | 16.3 | 16.5 | 16.2 | 16.1 | 16.3 | 16.3 | 15.7 | 15.9 |
| <i>ygiZ</i>   | 12.8 | 12.8 | 12.6 | 12.8 | 12.9 | 12.7 | 12.7 | 12.7 |
| <i>ygjG</i>   | 15.7 | 15.8 | 15.7 | 16.1 | 13.6 | 13.7 | 13.6 | 13.8 |
| <i>ygjH</i>   | 13.1 | 13.1 | 13.0 | 13.6 | 13.4 | 13.0 | 13.2 | 12.8 |
| <i>ygjI</i>   | 12.5 | 12.6 | 12.5 | 12.7 | 12.7 | 12.6 | 12.4 | 12.5 |
| <i>ygjJ</i>   | 12.7 | 12.6 | 12.6 | 14.3 | 12.8 | 12.6 | 12.6 | 12.7 |
| <i>ygjK</i>   | 12.8 | 12.8 | 12.7 | 13.2 | 12.9 | 12.8 | 12.8 | 12.6 |
| <i>ygjP</i>   | 14.4 | 14.2 | 14.1 | 14.2 | 14.1 | 14.3 | 14.0 | 14.5 |
| <i>ygjQ</i>   | 12.7 | 12.8 | 12.6 | 12.8 | 12.7 | 12.7 | 12.7 | 12.6 |
| <i>ygjR</i>   | 14.8 | 14.8 | 14.5 | 14.3 | 14.6 | 15.0 | 14.6 | 14.7 |
| <i>ygjV</i>   | 13.2 | 13.1 | 13.1 | 12.9 | 13.2 | 13.4 | 13.3 | 13.3 |
| <i>yhaB</i>   | 12.7 | 12.9 | 12.6 | 13.0 | 12.8 | 12.7 | 12.5 | 12.7 |
| <i>yhaC</i>   | 12.6 | 12.6 | 12.4 | 12.7 | 12.6 | 12.6 | 12.3 | 12.5 |
| <i>yhaH</i>   | 15.8 | 15.5 | 16.0 | 15.4 | 15.6 | 15.4 | 15.8 | 16.0 |
| <i>yhaI</i>   | 13.3 | 13.0 | 13.1 | 13.0 | 13.0 | 13.1 | 12.9 | 13.1 |
| <i>yhaJ</i>   | 15.0 | 15.0 | 15.0 | 14.9 | 15.1 | 15.0 | 14.9 | 14.9 |
| <i>yhaK</i>   | 13.5 | 13.4 | 13.3 | 13.4 | 13.2 | 13.3 | 13.2 | 13.1 |
| <i>yhaL</i>   | 15.5 | 15.2 | 14.8 | 14.6 | 14.9 | 15.6 | 14.4 | 14.8 |
| <i>yhaM</i>   | 13.2 | 13.2 | 13.1 | 13.4 | 13.4 | 13.2 | 13.3 | 13.2 |
| <i>yhaO</i>   | 13.1 | 13.1 | 12.9 | 13.3 | 13.5 | 13.2 | 13.2 | 13.1 |
| <i>yhaV</i>   | 15.3 | 15.3 | 14.7 | 14.8 | 15.2 | 15.6 | 14.9 | 15.3 |
| <i>yhbE</i>   | 15.3 | 15.2 | 15.2 | 15.1 | 15.3 | 15.4 | 15.3 | 15.4 |
| <i>yhbJ</i>   | 16.9 | 16.9 | 16.6 | 16.7 | 17.0 | 17.3 | 17.2 | 17.2 |
| <i>yhbO</i>   | 14.4 | 14.1 | 14.1 | 14.3 | 13.8 | 13.8 | 13.6 | 13.9 |
| <i>yhbP</i>   | 13.9 | 13.8 | 13.6 | 13.5 | 13.9 | 13.9 | 13.7 | 13.8 |
| <i>yhbQ</i>   | 14.1 | 14.0 | 14.0 | 13.6 | 13.9 | 14.0 | 13.8 | 14.0 |
| <i>yhbS</i>   | 14.7 | 14.7 | 14.5 | 14.6 | 15.7 | 15.4 | 15.5 | 15.9 |
| <i>yhbT</i>   | 16.2 | 16.1 | 16.1 | 15.8 | 17.3 | 17.0 | 17.1 | 17.4 |
| <i>yhbU</i>   | 12.8 | 12.8 | 12.7 | 12.9 | 15.4 | 15.8 | 15.6 | 15.7 |
| <i>yhbV</i>   | 12.9 | 12.9 | 12.8 | 12.7 | 14.7 | 14.9 | 14.8 | 14.9 |
| <i>yhbW</i>   | 15.1 | 15.1 | 15.4 | 14.8 | 13.5 | 13.6 | 13.6 | 13.6 |
| <i>yhbX</i>   | 12.9 | 13.0 | 12.8 | 13.0 | 13.0 | 13.1 | 12.8 | 13.0 |
| <i>yhbY</i>   | 17.8 | 17.8 | 17.4 | 17.6 | 17.6 | 17.8 | 17.4 | 17.6 |
| <i>yhcA</i>   | 13.1 | 12.9 | 12.8 | 13.2 | 12.9 | 12.8 | 12.7 | 12.8 |
| <i>yhcB</i>   | 16.9 | 17.0 | 16.9 | 16.6 | 16.8 | 17.1 | 16.8 | 16.9 |
| <i>yhcC</i>   | 12.9 | 12.8 | 12.8 | 14.0 | 13.7 | 13.8 | 13.9 | 13.8 |
| <i>yhcD</i>   | 13.2 | 13.1 | 12.9 | 13.3 | 13.0 | 13.1 | 12.9 | 12.9 |
| <i>yhcF</i>   | 14.2 | 14.2 | 13.8 | 13.9 | 14.0 | 14.4 | 13.7 | 13.9 |
| <i>yhcG</i>   | 12.9 | 13.0 | 12.8 | 13.0 | 12.9 | 13.0 | 12.8 | 12.8 |
| <i>yhcH</i>   | 14.2 | 14.2 | 13.8 | 13.9 | 14.0 | 14.1 | 13.7 | 13.8 |
| <i>yhcM</i>   | 15.2 | 15.2 | 15.0 | 15.1 | 14.8 | 15.2 | 14.8 | 14.8 |
| <i>yhcN</i>   | 14.4 | 14.6 | 14.0 | 14.2 | 13.7 | 14.0 | 13.4 | 13.4 |
| <i>yhcO</i>   | 15.2 | 15.2 | 14.3 | 14.5 | 14.6 | 14.8 | 13.9 | 14.7 |
| <i>yhdE</i>   | 15.9 | 15.9 | 15.7 | 15.4 | 16.3 | 15.9 | 15.7 | 16.0 |

|               |      |      |      |      |      |      |      |      |
|---------------|------|------|------|------|------|------|------|------|
| <i>yhdH</i>   | 15.0 | 15.0 | 15.0 | 14.9 | 16.4 | 15.9 | 16.1 | 15.9 |
| <i>yhdJ</i>   | 14.3 | 13.3 | 13.1 | 16.4 | 13.4 | 13.6 | 13.3 | 13.3 |
| <i>yhdN</i>   | 15.9 | 15.9 | 15.4 | 15.7 | 16.2 | 16.3 | 15.8 | 16.1 |
| <i>yhdP</i>   | 14.0 | 13.9 | 13.7 | 13.5 | 13.8 | 13.9 | 13.7 | 13.8 |
| <i>yhdT</i>   | 14.4 | 14.2 | 14.4 | 13.9 | 14.0 | 14.2 | 14.3 | 14.3 |
| <i>yhdU</i>   | 14.3 | 14.2 | 13.8 | 14.0 | 13.4 | 13.9 | 13.3 | 13.6 |
| <i>yhdV</i>   | 13.3 | 13.2 | 13.4 | 13.3 | 13.3 | 13.3 | 13.4 | 13.1 |
| <i>yhdW</i>   | 13.5 | 13.0 | 13.1 | 13.2 | 13.1 | 13.0 | 13.1 | 13.1 |
| <i>yhdX</i>   | 12.7 | 12.7 | 12.6 | 12.9 | 12.7 | 12.7 | 12.6 | 12.6 |
| <i>yhdY</i>   | 12.9 | 12.9 | 12.7 | 13.2 | 12.9 | 12.9 | 12.8 | 12.8 |
| <i>yhdZ</i>   | 13.6 | 13.7 | 13.3 | 13.1 | 13.3 | 13.7 | 13.2 | 13.3 |
| <i>yheL</i>   | 16.4 | 16.3 | 16.1 | 16.1 | 16.4 | 16.6 | 16.2 | 16.6 |
| <i>yheM</i>   | 15.9 | 15.8 | 15.6 | 15.8 | 15.8 | 16.1 | 16.1 | 16.3 |
| <i>yheN</i>   | 15.6 | 15.6 | 15.6 | 15.6 | 16.1 | 15.8 | 15.9 | 15.9 |
| <i>yheO</i>   | 16.8 | 16.8 | 16.4 | 16.9 | 16.9 | 17.2 | 16.9 | 17.2 |
| <i>yheS</i>   | 15.4 | 15.3 | 15.3 | 15.3 | 15.1 | 15.5 | 15.3 | 15.2 |
| <i>yheT</i>   | 15.0 | 15.0 | 14.6 | 14.7 | 14.7 | 15.2 | 14.8 | 15.0 |
| <i>yheU</i>   | 16.3 | 16.5 | 16.0 | 16.1 | 16.2 | 16.5 | 15.8 | 16.0 |
| <i>yheV</i>   | 16.9 | 17.0 | 16.0 | 16.7 | 14.9 | 15.6 | 14.6 | 15.2 |
| <i>yhfA</i>   | 16.7 | 16.7 | 16.3 | 16.3 | 16.7 | 16.7 | 16.4 | 16.9 |
| <i>yhfG</i>   | 15.2 | 15.2 | 14.9 | 14.3 | 14.7 | 14.9 | 14.3 | 15.0 |
| <i>yhfK</i>   | 14.6 | 14.5 | 14.3 | 14.1 | 14.4 | 14.6 | 14.5 | 14.6 |
| <i>yhfL</i>   | 13.5 | 13.4 | 13.1 | 13.4 | 13.2 | 13.5 | 13.2 | 13.2 |
| <i>yhfS</i>   | 13.0 | 13.0 | 12.9 | 13.3 | 13.2 | 13.0 | 13.1 | 12.9 |
| <i>yhfT</i>   | 12.8 | 12.8 | 12.7 | 12.7 | 12.8 | 12.8 | 12.8 | 12.8 |
| <i>yhfU</i>   | 13.1 | 13.2 | 12.9 | 13.1 | 13.0 | 13.1 | 13.0 | 12.9 |
| <i>yhfW</i>   | 12.7 | 12.6 | 12.6 | 12.8 | 12.7 | 12.7 | 12.8 | 12.5 |
| <i>yhfX</i>   | 12.7 | 12.7 | 12.7 | 13.0 | 12.8 | 12.7 | 12.8 | 12.6 |
| <i>yhfY</i>   | 13.4 | 13.3 | 13.2 | 13.5 | 13.2 | 13.2 | 13.2 | 13.1 |
| <i>yhfZ</i>   | 13.6 | 13.5 | 13.4 | 13.5 | 13.5 | 13.4 | 13.3 | 13.2 |
| <i>yhgA</i>   | 13.5 | 13.3 | 13.1 | 13.2 | 13.3 | 13.7 | 13.4 | 13.2 |
| <i>yhgE</i>   | 13.8 | 13.7 | 13.5 | 13.7 | 13.8 | 13.8 | 13.7 | 13.7 |
| <i>yhgF</i>   | 16.0 | 15.9 | 15.8 | 16.0 | 15.6 | 15.7 | 15.8 | 15.6 |
| <i>yhgN</i>   | 14.2 | 14.3 | 13.9 | 14.1 | 14.3 | 14.4 | 14.1 | 14.3 |
| <i>yhhA</i>   | 15.0 | 15.2 | 14.7 | 14.8 | 14.4 | 15.1 | 14.2 | 14.5 |
| <i>yhhH</i>   | 13.3 | 13.3 | 12.9 | 13.2 | 13.2 | 13.3 | 12.8 | 12.8 |
| <i>yhhI</i>   | 13.2 | 13.1 | 12.8 | 13.0 | 13.4 | 13.2 | 12.9 | 12.9 |
| <i>yhhJ</i>   | 15.0 | 14.7 | 14.9 | 14.9 | 14.6 | 14.7 | 14.6 | 14.5 |
| <i>yhhK</i>   | 14.3 | 14.4 | 14.2 | 13.9 | 14.3 | 14.5 | 14.2 | 14.1 |
| <i>yhhL</i>   | 14.9 | 14.7 | 14.7 | 14.5 | 14.2 | 14.9 | 14.6 | 14.7 |
| <i>yhhM</i>   | 15.5 | 15.5 | 15.1 | 14.9 | 15.2 | 15.5 | 14.9 | 15.4 |
| <i>yhhN</i>   | 15.5 | 15.3 | 15.3 | 14.7 | 15.2 | 15.4 | 15.3 | 15.6 |
| <i>yhhQ</i>   | 14.6 | 14.5 | 14.4 | 14.1 | 14.0 | 14.6 | 14.4 | 14.4 |
| <i>yhhS</i>   | 13.9 | 13.9 | 13.8 | 13.5 | 13.9 | 14.2 | 14.0 | 14.0 |
| <i>yhhT</i>   | 14.0 | 13.9 | 13.7 | 13.7 | 14.0 | 14.0 | 13.9 | 14.0 |
| <i>yhhW</i>   | 14.1 | 14.2 | 13.9 | 13.9 | 14.0 | 14.4 | 14.1 | 14.1 |
| <i>yhhX</i>   | 16.0 | 16.0 | 15.6 | 15.8 | 15.8 | 16.2 | 15.6 | 15.8 |
| <i>yhhY</i>   | 14.0 | 13.8 | 14.5 | 14.0 | 14.1 | 14.4 | 14.2 | 14.0 |
| <i>yhhZ</i>   | 12.6 | 12.6 | 12.5 | 12.9 | 12.6 | 12.6 | 12.5 | 12.6 |
| <i>yhiD</i>   | 14.5 | 14.5 | 13.9 | 14.2 | 17.2 | 16.4 | 16.7 | 17.3 |
| <i>yhiI</i>   | 15.9 | 15.6 | 15.9 | 15.8 | 15.6 | 15.5 | 15.6 | 15.4 |
| <i>yhiJ</i>   | 13.0 | 12.9 | 12.7 | 13.1 | 13.1 | 12.9 | 12.7 | 12.7 |
| <i>yhiK</i>   | 12.8 | 12.7 | 12.6 | 12.9 | 12.7 | 13.1 | 12.6 | 12.6 |
| <i>yhiL</i>   | 12.5 | 12.5 | 12.4 | 12.8 | 12.5 | 12.5 | 12.3 | 12.4 |
| <i>yhiM</i>   | 13.5 | 13.7 | 13.3 | 13.2 | 16.0 | 15.1 | 15.5 | 16.6 |
| <i>yhiN</i>   | 14.6 | 14.5 | 14.5 | 14.2 | 14.7 | 14.5 | 14.4 | 14.6 |
| <i>yhiQ</i>   | 14.5 | 14.5 | 14.4 | 14.5 | 14.6 | 14.2 | 14.3 | 14.0 |
| <i>yhiR</i>   | 15.1 | 15.0 | 15.0 | 14.8 | 14.7 | 15.1 | 15.0 | 14.9 |
| <i>yhiS_1</i> | 12.8 | 12.8 | 12.7 | 13.2 | 13.0 | 12.7 | 12.8 | 12.8 |
| <i>yhjA</i>   | 13.1 | 13.0 | 12.9 | 13.2 | 13.6 | 13.8 | 13.6 | 13.6 |
| <i>yhjB</i>   | 13.4 | 13.6 | 13.1 | 13.1 | 13.3 | 13.4 | 13.3 | 13.0 |

|             |      |      |      |      |      |      |      |      |
|-------------|------|------|------|------|------|------|------|------|
| <i>yhjC</i> | 14.0 | 13.9 | 13.8 | 13.8 | 13.5 | 13.9 | 13.5 | 13.5 |
| <i>yhjD</i> | 15.0 | 14.9 | 14.6 | 14.6 | 14.3 | 14.8 | 14.2 | 14.5 |
| <i>yhjE</i> | 17.5 | 17.8 | 17.7 | 17.4 | 15.6 | 16.5 | 15.7 | 15.9 |
| <i>yhjG</i> | 14.0 | 13.9 | 13.7 | 14.1 | 13.8 | 13.6 | 13.5 | 13.6 |
| <i>yhjH</i> | 12.8 | 13.1 | 12.7 | 12.9 | 12.9 | 13.1 | 12.8 | 12.6 |
| <i>yhjJ</i> | 14.9 | 15.1 | 14.9 | 14.7 | 15.1 | 15.2 | 15.0 | 15.1 |
| <i>yhjK</i> | 14.3 | 14.2 | 13.9 | 13.8 | 13.9 | 14.4 | 13.9 | 14.1 |
| <i>yhjR</i> | 15.8 | 15.7 | 15.1 | 14.9 | 14.7 | 15.0 | 14.0 | 14.6 |
| <i>yhjV</i> | 13.8 | 13.7 | 13.5 | 13.5 | 13.4 | 13.7 | 13.3 | 13.5 |
| <i>yhjX</i> | 12.9 | 12.9 | 12.8 | 13.0 | 13.5 | 12.9 | 12.9 | 12.9 |
| <i>yhjY</i> | 14.7 | 14.7 | 14.4 | 14.1 | 14.7 | 14.7 | 14.5 | 14.8 |
| <i>yiaA</i> | 12.8 | 13.0 | 12.6 | 12.9 | 12.8 | 13.0 | 12.7 | 12.8 |
| <i>yiaB</i> | 12.9 | 12.9 | 12.7 | 13.4 | 12.8 | 13.1 | 12.7 | 12.9 |
| <i>yiaC</i> | 14.2 | 14.1 | 14.1 | 13.6 | 14.6 | 14.7 | 14.6 | 14.6 |
| <i>yiaD</i> | 14.1 | 13.7 | 14.1 | 13.6 | 13.8 | 13.5 | 13.8 | 13.5 |
| <i>yiaF</i> | 16.8 | 16.6 | 16.1 | 16.4 | 16.7 | 16.8 | 16.6 | 17.0 |
| <i>yiaG</i> | 17.7 | 17.6 | 16.6 | 17.3 | 16.3 | 16.9 | 15.3 | 16.7 |
| <i>yiaJ</i> | 15.4 | 15.5 | 15.2 | 15.1 | 15.1 | 15.6 | 15.2 | 15.4 |
| <i>yiaK</i> | 12.8 | 12.8 | 12.7 | 13.0 | 12.9 | 12.7 | 12.8 | 12.6 |
| <i>yiaL</i> | 12.8 | 12.8 | 12.6 | 13.2 | 12.8 | 12.8 | 12.7 | 12.7 |
| <i>yiaM</i> | 12.6 | 12.6 | 12.5 | 12.8 | 12.6 | 12.7 | 12.5 | 12.5 |
| <i>yiaN</i> | 12.8 | 12.9 | 12.6 | 13.0 | 13.2 | 12.8 | 12.9 | 12.5 |
| <i>yiaO</i> | 12.8 | 12.8 | 12.6 | 13.1 | 12.9 | 12.7 | 12.6 | 12.6 |
| <i>yiaT</i> | 13.0 | 12.9 | 12.9 | 13.1 | 13.6 | 13.0 | 12.9 | 12.8 |
| <i>yiaU</i> | 13.8 | 13.8 | 13.5 | 13.6 | 13.5 | 13.9 | 13.5 | 13.4 |
| <i>yiaV</i> | 12.8 | 12.8 | 12.7 | 13.3 | 12.8 | 12.8 | 12.7 | 12.6 |
| <i>yiaW</i> | 12.8 | 12.8 | 12.7 | 13.2 | 12.9 | 12.8 | 12.8 | 13.1 |
| <i>yiaY</i> | 12.7 | 12.7 | 12.6 | 12.9 | 12.9 | 12.9 | 12.8 | 12.7 |
| <i>yibA</i> | 14.1 | 13.7 | 13.7 | 13.6 | 13.5 | 13.6 | 13.1 | 13.2 |
| <i>yibD</i> | 14.7 | 14.5 | 14.5 | 14.5 | 13.8 | 13.0 | 13.1 | 14.2 |
| <i>yibF</i> | 15.1 | 15.2 | 14.7 | 14.5 | 14.0 | 14.3 | 13.9 | 14.0 |
| <i>yibG</i> | 12.9 | 12.8 | 12.6 | 13.4 | 12.9 | 12.8 | 12.6 | 12.7 |
| <i>yibH</i> | 13.3 | 13.3 | 13.2 | 13.4 | 13.2 | 13.0 | 13.2 | 13.0 |
| <i>yibI</i> | 13.9 | 13.9 | 13.6 | 13.7 | 13.6 | 13.6 | 13.4 | 13.5 |
| <i>yibJ</i> | 13.3 | 13.2 | 13.2 | 13.3 | 13.2 | 13.2 | 13.2 | 13.1 |
| <i>yibL</i> | 16.5 | 16.3 | 15.8 | 15.7 | 15.7 | 16.2 | 15.2 | 15.7 |
| <i>yibN</i> | 18.0 | 17.9 | 17.5 | 17.7 | 17.7 | 17.9 | 17.4 | 17.5 |
| <i>yibQ</i> | 14.7 | 14.6 | 14.3 | 14.2 | 14.3 | 14.8 | 14.4 | 14.6 |
| <i>yibT</i> | 16.4 | 16.5 | 16.0 | 15.5 | 16.1 | 16.5 | 15.5 | 16.1 |
| <i>yibV</i> | 13.1 | 13.0 | 12.8 | 13.4 | 13.0 | 12.9 | 12.7 | 12.8 |
| <i>yicC</i> | 15.9 | 15.9 | 15.6 | 15.7 | 15.6 | 15.8 | 15.5 | 15.7 |
| <i>yicG</i> | 13.0 | 13.0 | 12.9 | 12.8 | 12.9 | 13.0 | 12.9 | 12.8 |
| <i>yicH</i> | 15.0 | 15.0 | 15.0 | 14.8 | 14.9 | 15.3 | 15.1 | 15.2 |
| <i>yicI</i> | 13.0 | 13.0 | 12.9 | 13.1 | 13.1 | 13.1 | 13.1 | 12.9 |
| <i>yicJ</i> | 12.9 | 12.9 | 12.7 | 13.0 | 12.8 | 12.9 | 12.8 | 12.7 |
| <i>yicL</i> | 14.5 | 14.4 | 14.2 | 13.9 | 14.2 | 14.5 | 14.3 | 14.4 |
| <i>yicN</i> | 13.8 | 13.9 | 13.5 | 13.5 | 13.6 | 13.9 | 13.7 | 13.6 |
| <i>yicO</i> | 12.7 | 12.7 | 12.6 | 13.1 | 12.9 | 12.7 | 12.7 | 12.6 |
| <i>yicR</i> | 15.2 | 15.0 | 15.0 | 14.7 | 15.4 | 15.1 | 15.1 | 15.2 |
| <i>yicS</i> | 13.9 | 14.0 | 13.5 | 14.0 | 13.6 | 14.0 | 13.3 | 13.5 |
| <i>ydA</i>  | 16.0 | 15.9 | 15.9 | 15.7 | 15.9 | 16.3 | 16.1 | 16.0 |
| <i>ydB</i>  | 15.6 | 15.5 | 15.3 | 14.8 | 15.2 | 15.3 | 14.8 | 15.0 |
| <i>ydC</i>  | 17.2 | 17.1 | 17.1 | 17.2 | 16.7 | 16.8 | 17.0 | 17.0 |
| <i>ydD</i>  | 17.7 | 17.6 | 17.3 | 17.6 | 17.1 | 17.5 | 17.1 | 17.3 |
| <i>ydE</i>  | 14.6 | 14.5 | 14.4 | 14.2 | 14.6 | 14.9 | 14.6 | 14.7 |
| <i>ydF</i>  | 13.3 | 13.3 | 13.0 | 13.0 | 13.3 | 13.6 | 13.4 | 13.5 |
| <i>ydG</i>  | 14.0 | 14.0 | 13.7 | 13.6 | 13.9 | 14.1 | 13.8 | 13.8 |
| <i>ydH</i>  | 14.5 | 14.4 | 14.1 | 13.9 | 14.2 | 14.5 | 14.1 | 14.4 |
| <i>ydI</i>  | 13.7 | 13.7 | 13.4 | 14.2 | 13.4 | 13.7 | 13.4 | 13.6 |
| <i>ydJ</i>  | 12.9 | 13.0 | 12.7 | 13.2 | 12.9 | 12.9 | 12.9 | 12.7 |
| <i>ydK</i>  | 12.7 | 12.7 | 12.6 | 12.9 | 13.0 | 12.7 | 12.7 | 12.6 |

|             |      |      |      |      |      |      |      |      |
|-------------|------|------|------|------|------|------|------|------|
| <i>ydL</i>  | 13.1 | 12.9 | 13.0 | 13.1 | 12.9 | 12.9 | 12.7 | 12.7 |
| <i>ydP</i>  | 13.0 | 13.2 | 12.7 | 13.7 | 13.1 | 13.0 | 12.9 | 12.7 |
| <i>ydQ</i>  | 16.2 | 16.3 | 15.7 | 16.2 | 16.9 | 16.7 | 16.5 | 16.9 |
| <i>ydR</i>  | 13.9 | 14.0 | 13.8 | 14.0 | 14.0 | 14.1 | 14.1 | 14.1 |
| <i>ydX</i>  | 13.4 | 13.4 | 13.1 | 13.1 | 13.4 | 13.6 | 13.1 | 13.2 |
| <i>ydZ</i>  | 13.8 | 13.8 | 13.5 | 13.4 | 13.5 | 13.8 | 13.6 | 13.6 |
| <i>yeE</i>  | 15.1 | 15.1 | 14.6 | 14.4 | 14.8 | 14.9 | 14.6 | 15.0 |
| <i>yeF</i>  | 15.3 | 15.3 | 15.2 | 14.8 | 15.1 | 15.1 | 15.1 | 15.2 |
| <i>yeG</i>  | 16.5 | 16.3 | 16.4 | 16.4 | 16.6 | 16.4 | 16.6 | 16.6 |
| <i>yeH</i>  | 14.8 | 14.8 | 14.4 | 14.6 | 14.5 | 15.0 | 14.5 | 14.6 |
| <i>yeK</i>  | 13.2 | 13.3 | 13.1 | 13.7 | 13.3 | 13.3 | 13.2 | 13.1 |
| <i>yeL</i>  | 12.9 | 12.8 | 12.8 | 12.8 | 12.8 | 12.9 | 12.8 | 12.6 |
| <i>yeP</i>  | 15.9 | 15.3 | 15.1 | 15.6 | 16.0 | 15.9 | 15.7 | 16.1 |
| <i>yifB</i> | 13.1 | 13.0 | 12.8 | 13.1 | 13.0 | 13.1 | 12.9 | 12.9 |
| <i>yifE</i> | 17.4 | 17.6 | 17.1 | 16.9 | 17.6 | 17.4 | 16.5 | 17.2 |
| <i>yifK</i> | 16.0 | 15.8 | 15.6 | 15.8 | 14.9 | 15.1 | 14.6 | 14.9 |
| <i>yifL</i> | 17.9 | 17.7 | 17.7 | 17.4 | 17.7 | 17.9 | 17.6 | 17.8 |
| <i>yifN</i> | 14.4 | 14.4 | 13.7 | 13.3 | 14.2 | 14.8 | 13.8 | 14.1 |
| <i>yifO</i> | 14.5 | 14.5 | 13.8 | 14.1 | 14.3 | 14.9 | 13.9 | 14.2 |
| <i>yigA</i> | 16.0 | 16.0 | 15.8 | 16.1 | 16.1 | 16.0 | 16.0 | 16.2 |
| <i>yigB</i> | 15.1 | 15.0 | 14.9 | 14.9 | 14.9 | 15.2 | 15.1 | 14.9 |
| <i>yigE</i> | 13.0 | 12.9 | 12.8 | 13.2 | 13.1 | 12.9 | 12.9 | 12.8 |
| <i>yigF</i> | 12.9 | 12.8 | 12.8 | 12.8 | 12.8 | 12.9 | 12.7 | 12.8 |
| <i>yigG</i> | 12.9 | 12.9 | 12.7 | 13.3 | 12.8 | 13.0 | 12.7 | 12.8 |
| <i>yigI</i> | 16.1 | 16.0 | 15.9 | 15.7 | 13.1 | 13.4 | 13.2 | 13.1 |
| <i>yigL</i> | 15.4 | 15.4 | 15.0 | 14.9 | 15.2 | 15.4 | 15.0 | 15.4 |
| <i>yigM</i> | 13.8 | 14.1 | 13.7 | 13.4 | 13.5 | 14.0 | 13.7 | 13.6 |
| <i>yigP</i> | 15.7 | 15.6 | 15.7 | 15.7 | 15.6 | 15.6 | 15.8 | 15.7 |
| <i>yigZ</i> | 15.4 | 15.3 | 15.3 | 15.7 | 15.4 | 15.2 | 15.3 | 15.1 |
| <i>yihA</i> | 16.3 | 16.3 | 16.0 | 16.1 | 15.7 | 15.9 | 15.6 | 16.0 |
| <i>yihD</i> | 17.4 | 17.2 | 16.8 | 17.1 | 17.9 | 18.2 | 17.4 | 17.9 |
| <i>yihF</i> | 12.9 | 12.8 | 12.7 | 13.1 | 12.9 | 13.0 | 12.7 | 12.8 |
| <i>yihG</i> | 14.3 | 14.3 | 13.8 | 13.7 | 13.8 | 14.4 | 13.6 | 13.9 |
| <i>yihI</i> | 16.6 | 16.5 | 16.0 | 16.3 | 15.9 | 16.2 | 15.4 | 15.8 |
| <i>yihL</i> | 13.6 | 13.5 | 13.3 | 13.6 | 13.3 | 13.5 | 13.2 | 13.1 |
| <i>yihM</i> | 13.7 | 13.5 | 13.3 | 13.6 | 13.5 | 13.6 | 13.2 | 13.4 |
| <i>yihN</i> | 12.9 | 12.8 | 12.8 | 13.1 | 12.8 | 12.8 | 12.7 | 12.7 |
| <i>yihO</i> | 12.7 | 12.8 | 12.6 | 13.9 | 12.7 | 12.8 | 12.7 | 12.6 |
| <i>yihP</i> | 12.8 | 12.8 | 12.6 | 13.2 | 12.8 | 12.7 | 12.7 | 12.6 |
| <i>yihQ</i> | 12.8 | 12.8 | 12.8 | 13.0 | 13.1 | 12.9 | 13.0 | 12.6 |
| <i>yihR</i> | 12.8 | 12.7 | 12.7 | 12.9 | 12.8 | 12.8 | 12.7 | 12.7 |
| <i>yihS</i> | 13.1 | 13.0 | 13.0 | 13.2 | 13.2 | 13.2 | 13.2 | 12.9 |
| <i>yihT</i> | 13.0 | 13.1 | 13.0 | 13.1 | 13.0 | 13.1 | 13.1 | 12.9 |
| <i>yihU</i> | 12.8 | 12.8 | 12.8 | 13.1 | 13.1 | 12.9 | 12.9 | 12.8 |
| <i>yihV</i> | 13.1 | 13.0 | 13.0 | 13.2 | 13.4 | 13.2 | 13.3 | 13.1 |
| <i>yihW</i> | 15.1 | 15.0 | 14.8 | 14.7 | 14.9 | 15.0 | 14.7 | 14.9 |
| <i>yihX</i> | 15.7 | 15.4 | 15.5 | 15.3 | 15.6 | 15.4 | 15.4 | 15.5 |
| <i>yihY</i> | 15.6 | 15.5 | 15.2 | 15.4 | 15.6 | 15.9 | 15.4 | 15.6 |
| <i>yiiD</i> | 15.9 | 15.8 | 15.5 | 15.8 | 16.0 | 15.9 | 15.9 | 15.9 |
| <i>yiiE</i> | 13.2 | 13.1 | 12.9 | 14.1 | 13.2 | 13.0 | 13.0 | 12.9 |
| <i>yiiF</i> | 14.2 | 14.4 | 13.7 | 13.9 | 14.1 | 14.4 | 15.8 | 14.0 |
| <i>yiiG</i> | 13.0 | 12.9 | 12.8 | 13.2 | 12.9 | 12.9 | 12.8 | 12.8 |
| <i>yiiM</i> | 15.1 | 15.1 | 15.0 | 14.9 | 15.5 | 15.0 | 14.9 | 14.9 |
| <i>yiiQ</i> | 15.8 | 15.7 | 15.3 | 15.5 | 15.2 | 15.9 | 15.1 | 15.4 |
| <i>yiiR</i> | 14.7 | 14.6 | 14.4 | 14.2 | 14.7 | 14.7 | 14.5 | 14.7 |
| <i>yiiS</i> | 17.2 | 17.5 | 16.4 | 17.0 | 17.2 | 17.9 | 17.1 | 17.4 |
| <i>yiiX</i> | 14.3 | 14.0 | 13.9 | 14.0 | 14.1 | 14.6 | 14.3 | 14.5 |
| <i>yijD</i> | 16.0 | 16.0 | 15.9 | 15.7 | 15.6 | 15.9 | 15.7 | 16.1 |
| <i>yijE</i> | 13.3 | 13.2 | 13.1 | 13.2 | 13.2 | 13.3 | 13.4 | 13.3 |
| <i>yijF</i> | 12.8 | 12.8 | 12.7 | 13.3 | 13.0 | 12.9 | 12.8 | 12.9 |
| <i>yijO</i> | 13.9 | 14.0 | 13.9 | 13.6 | 14.0 | 14.3 | 14.1 | 14.0 |

|      |      |      |      |      |      |      |      |      |
|------|------|------|------|------|------|------|------|------|
| yjP  | 17.2 | 17.0 | 17.1 | 17.2 | 16.5 | 16.3 | 16.3 | 16.8 |
| yjaA | 13.3 | 13.1 | 13.1 | 13.2 | 13.1 | 13.2 | 13.0 | 13.0 |
| yjaB | 13.7 | 13.7 | 13.6 | 13.7 | 13.7 | 13.6 | 13.7 | 13.5 |
| yjaG | 16.1 | 16.0 | 15.6 | 15.8 | 15.8 | 16.2 | 15.6 | 16.0 |
| yjaH | 15.4 | 15.4 | 14.7 | 14.5 | 14.9 | 15.2 | 14.6 | 14.8 |
| yjaZ | 14.0 | 13.8 | 13.4 | 13.5 | 13.7 | 14.1 | 13.5 | 13.6 |
| yjbB | 14.0 | 13.7 | 13.8 | 13.5 | 13.3 | 13.5 | 13.4 | 13.3 |
| yjbE | 13.6 | 13.6 | 13.6 | 13.4 | 13.5 | 13.3 | 13.5 | 13.4 |
| yjbF | 12.7 | 12.7 | 12.6 | 13.3 | 12.7 | 12.7 | 12.7 | 12.7 |
| yjbG | 12.7 | 12.6 | 12.5 | 12.9 | 12.9 | 12.6 | 12.7 | 12.5 |
| yjbH | 13.0 | 12.9 | 12.8 | 13.3 | 13.0 | 12.9 | 12.9 | 12.8 |
| yjbI | 12.6 | 12.6 | 12.4 | 12.8 | 12.6 | 12.7 | 12.4 | 12.6 |
| yjbJ | 15.0 | 15.2 | 14.2 | 14.3 | 14.7 | 15.2 | 14.0 | 14.7 |
| yjbL | 12.9 | 12.9 | 12.6 | 13.0 | 12.8 | 12.8 | 12.5 | 12.7 |
| yjbM | 12.9 | 12.8 | 12.6 | 13.3 | 12.8 | 12.8 | 12.6 | 12.7 |
| yjbQ | 16.5 | 16.6 | 16.0 | 16.0 | 17.1 | 17.2 | 16.8 | 17.1 |
| yjbR | 15.7 | 15.9 | 15.1 | 15.6 | 16.1 | 16.3 | 16.1 | 16.7 |
| yjbS | 12.9 | 13.1 | 12.8 | 12.9 | 12.9 | 13.0 | 12.7 | 12.8 |
| yjbT | 13.0 | 13.2 | 12.8 | 13.0 | 12.9 | 13.1 | 12.9 | 12.9 |
| yjcB | 14.5 | 14.9 | 14.1 | 13.9 | 14.3 | 15.1 | 14.4 | 15.1 |
| yjcC | 13.6 | 13.6 | 13.2 | 13.3 | 13.2 | 13.5 | 13.0 | 13.1 |
| yjcD | 16.2 | 15.9 | 16.3 | 16.2 | 16.1 | 15.5 | 15.9 | 16.4 |
| yjcE | 14.6 | 14.6 | 14.4 | 14.4 | 14.4 | 14.8 | 14.5 | 14.6 |
| yjcF | 12.6 | 12.6 | 12.4 | 13.0 | 12.7 | 12.7 | 12.3 | 12.5 |
| yjcH | 14.5 | 14.0 | 14.6 | 14.3 | 12.9 | 12.9 | 12.9 | 12.9 |
| yjcO | 15.2 | 15.1 | 15.1 | 14.7 | 15.0 | 15.3 | 15.0 | 15.0 |
| yjcS | 12.7 | 12.8 | 12.6 | 13.1 | 12.8 | 12.7 | 12.7 | 12.6 |
| yjcZ | 12.9 | 13.0 | 13.0 | 13.1 | 13.0 | 13.1 | 13.0 | 12.7 |
| yjdA | 13.6 | 13.6 | 13.5 | 13.2 | 13.2 | 13.6 | 13.2 | 12.9 |
| yjdC | 16.5 | 16.6 | 16.2 | 16.3 | 16.3 | 16.3 | 16.1 | 16.5 |
| yjdF | 13.9 | 13.9 | 13.8 | 13.8 | 13.8 | 13.9 | 13.9 | 14.0 |
| yjdI | 15.7 | 15.5 | 15.2 | 15.1 | 15.7 | 15.4 | 14.7 | 15.1 |
| yjdJ | 16.1 | 15.7 | 15.4 | 15.5 | 15.7 | 15.6 | 14.9 | 15.3 |
| yjdK | 13.2 | 13.2 | 12.9 | 13.0 | 14.0 | 14.0 | 13.8 | 14.0 |
| yjdL | 13.3 | 13.2 | 13.0 | 12.9 | 13.2 | 13.3 | 13.1 | 13.0 |
| yjdM | 17.3 | 17.1 | 16.6 | 17.0 | 17.3 | 18.2 | 17.0 | 17.2 |
| yjdN | 14.5 | 14.8 | 14.3 | 13.9 | 13.9 | 14.7 | 13.8 | 14.0 |
| yjdO | 13.1 | 13.2 | 13.1 | 13.2 | 13.6 | 13.4 | 13.6 | 13.4 |
| yjdP | 14.5 | 14.4 | 14.3 | 14.1 | 14.6 | 14.4 | 14.4 | 14.5 |
| yjeA | 14.2 | 13.9 | 13.9 | 13.6 | 14.1 | 13.9 | 14.0 | 13.9 |
| yjeE | 15.3 | 15.3 | 15.2 | 15.0 | 15.5 | 15.4 | 15.4 | 15.6 |
| yjeF | 14.8 | 14.9 | 14.8 | 14.5 | 15.1 | 14.9 | 15.0 | 15.0 |
| yjeH | 14.6 | 14.7 | 14.3 | 14.1 | 14.3 | 14.8 | 14.4 | 14.4 |
| yjeI | 17.3 | 17.4 | 17.4 | 17.0 | 17.7 | 17.6 | 17.4 | 17.4 |
| yjeJ | 13.4 | 13.3 | 13.1 | 13.1 | 13.0 | 13.3 | 13.0 | 13.0 |
| yjeK | 15.5 | 15.6 | 15.0 | 15.0 | 15.2 | 15.5 | 15.0 | 15.3 |
| yjeM | 12.9 | 12.8 | 12.8 | 12.8 | 12.9 | 12.9 | 12.8 | 12.8 |
| yjeN | 12.9 | 12.8 | 12.8 | 13.1 | 13.1 | 12.9 | 12.9 | 12.8 |
| yjeO | 13.1 | 13.2 | 13.0 | 13.1 | 13.1 | 13.2 | 12.9 | 13.1 |
| yjeP | 13.8 | 13.8 | 13.6 | 13.4 | 13.5 | 13.8 | 13.6 | 13.7 |
| yjeS | 14.1 | 14.1 | 13.8 | 13.6 | 14.0 | 14.2 | 13.9 | 13.9 |
| yjeT | 14.1 | 14.1 | 13.9 | 15.0 | 14.2 | 14.1 | 13.9 | 13.9 |
| yjeV | 13.7 | 13.6 | 13.8 | 13.3 | 13.7 | 13.8 | 13.6 | 13.5 |
| yjfC | 12.9 | 12.9 | 12.7 | 13.1 | 13.1 | 12.9 | 12.9 | 12.8 |
| yjfF | 13.0 | 13.0 | 13.0 | 13.0 | 13.0 | 13.1 | 12.9 | 12.9 |
| yjfI | 12.9 | 12.9 | 12.9 | 13.1 | 12.9 | 13.0 | 12.8 | 12.7 |
| yjfJ | 12.9 | 12.8 | 12.8 | 13.0 | 12.9 | 12.8 | 12.8 | 12.7 |
| yjfK | 12.8 | 12.7 | 12.6 | 12.8 | 12.8 | 12.8 | 12.6 | 12.6 |
| yjfL | 12.8 | 12.8 | 12.8 | 13.1 | 13.0 | 12.9 | 12.9 | 12.8 |
| yjfM | 12.8 | 12.8 | 12.7 | 14.0 | 12.9 | 12.8 | 12.7 | 12.8 |
| yjfN | 14.0 | 14.1 | 13.7 | 14.0 | 14.1 | 14.1 | 13.7 | 13.8 |

|        |      |      |      |      |      |      |      |      |
|--------|------|------|------|------|------|------|------|------|
| yjP    | 14.1 | 14.0 | 13.9 | 13.8 | 13.9 | 14.1 | 13.9 | 13.7 |
| yjY    | 14.1 | 14.5 | 13.7 | 13.5 | 13.9 | 14.7 | 13.6 | 13.9 |
| yjZ    | 13.1 | 13.0 | 12.8 | 13.2 | 12.8 | 12.9 | 12.6 | 12.7 |
| yjgA   | 16.2 | 16.1 | 15.8 | 15.7 | 15.9 | 16.1 | 15.7 | 16.1 |
| yjgB   | 14.2 | 14.3 | 14.2 | 14.1 | 14.6 | 14.1 | 14.2 | 14.6 |
| yjgF   | 19.3 | 19.2 | 19.4 | 19.3 | 19.2 | 19.1 | 19.4 | 19.4 |
| yjgH   | 14.9 | 15.0 | 14.3 | 15.2 | 14.4 | 14.6 | 14.1 | 14.5 |
| yjgI   | 13.1 | 13.2 | 13.1 | 12.9 | 13.0 | 13.1 | 13.0 | 12.9 |
| yjgJ   | 14.8 | 14.7 | 14.3 | 14.4 | 14.2 | 14.7 | 14.1 | 14.3 |
| yjgL   | 12.9 | 12.9 | 12.7 | 13.0 | 12.9 | 12.8 | 12.7 | 12.8 |
| yjgM   | 15.2 | 15.4 | 15.1 | 14.9 | 15.1 | 15.4 | 15.1 | 15.0 |
| yjgN   | 14.5 | 12.6 | 12.6 | 15.9 | 12.7 | 12.7 | 12.5 | 12.5 |
| yjgR   | 14.8 | 14.8 | 14.5 | 14.6 | 14.8 | 14.6 | 14.3 | 14.5 |
| yjgW   | 13.3 | 13.2 | 13.1 | 13.2 | 13.4 | 13.5 | 13.2 | 13.1 |
| yjgX_1 | 13.9 | 13.9 | 13.7 | 13.4 | 14.0 | 14.2 | 13.6 | 13.6 |
| yjgX_2 | 14.4 | 14.4 | 14.1 | 13.9 | 14.4 | 14.7 | 14.0 | 14.3 |
| yjgX_3 | 13.1 | 13.2 | 13.0 | 13.2 | 13.3 | 13.1 | 13.0 | 12.9 |
| yjgZ   | 15.1 | 12.8 | 12.7 | 17.2 | 12.9 | 12.7 | 12.9 | 12.7 |
| yjhB   | 13.4 | 13.3 | 13.2 | 13.1 | 13.1 | 13.3 | 12.9 | 13.0 |
| yjhC   | 14.0 | 13.7 | 13.6 | 13.8 | 13.7 | 13.5 | 13.3 | 13.4 |
| yjhD   | 13.6 | 13.6 | 13.3 | 13.2 | 13.6 | 14.3 | 13.5 | 13.6 |
| yjhE   | 13.7 | 13.6 | 13.2 | 13.1 | 13.5 | 13.9 | 13.3 | 13.6 |
| yjhF   | 12.8 | 12.8 | 12.8 | 12.7 | 12.9 | 12.9 | 12.8 | 12.7 |
| yjhG   | 13.1 | 13.1 | 13.0 | 13.7 | 13.1 | 13.2 | 13.1 | 12.9 |
| yjhH   | 13.3 | 13.1 | 13.1 | 12.9 | 13.1 | 13.3 | 13.1 | 13.0 |
| yjhI   | 12.9 | 12.8 | 12.8 | 13.2 | 13.0 | 13.0 | 12.8 | 12.7 |
| yjhP   | 12.9 | 12.9 | 12.9 | 13.6 | 13.1 | 12.9 | 13.1 | 12.7 |
| yjhQ   | 13.2 | 13.2 | 13.1 | 13.4 | 13.1 | 13.4 | 13.2 | 13.0 |
| yjhR   | 13.2 | 13.2 | 12.8 | 13.4 | 13.0 | 13.1 | 12.9 | 13.7 |
| yjhU   | 15.6 | 15.6 | 15.3 | 15.3 | 15.7 | 15.6 | 15.3 | 15.6 |
| yjhV   | 12.9 | 12.9 | 12.8 | 12.9 | 12.9 | 15.5 | 12.9 | 12.7 |
| yjhW   | 13.2 | 13.2 | 13.0 | 13.1 | 13.2 | 13.2 | 13.1 | 12.9 |
| yjhX   | 13.5 | 13.3 | 13.3 | 13.6 | 13.4 | 13.7 | 13.3 | 13.9 |
| yjiA   | 14.9 | 14.9 | 15.1 | 14.6 | 14.6 | 14.9 | 14.9 | 14.8 |
| yjiC   | 12.7 | 12.7 | 12.5 | 13.0 | 12.7 | 12.9 | 12.6 | 12.6 |
| yjiG   | 14.8 | 14.6 | 14.2 | 14.6 | 15.7 | 15.5 | 15.9 | 16.0 |
| yjiH   | 13.1 | 13.1 | 12.9 | 13.3 | 15.8 | 15.4 | 16.2 | 16.0 |
| yjiJ   | 13.2 | 13.1 | 12.9 | 12.8 | 12.8 | 12.8 | 12.7 | 12.7 |
| yjiK   | 13.7 | 13.4 | 13.3 | 13.3 | 13.8 | 14.0 | 13.8 | 14.0 |
| yjiL   | 12.8 | 12.8 | 12.7 | 13.0 | 15.1 | 14.5 | 15.3 | 15.3 |
| yjiM   | 13.0 | 13.1 | 12.9 | 13.2 | 16.4 | 15.8 | 16.5 | 16.6 |
| yjiN   | 13.7 | 13.6 | 13.3 | 13.4 | 13.5 | 13.9 | 13.4 | 13.7 |
| yjiP   | 13.4 | 13.3 | 13.1 | 13.7 | 13.2 | 13.5 | 13.2 | 13.2 |
| yjiQ   | 14.8 | 14.8 | 14.3 | 14.4 | 14.8 | 15.2 | 14.3 | 14.6 |
| yjiR   | 14.2 | 14.3 | 14.1 | 13.8 | 13.6 | 13.6 | 13.5 | 13.4 |
| yjiS   | 13.2 | 13.2 | 13.1 | 13.4 | 13.1 | 12.9 | 13.2 | 12.8 |
| yjiT   | 15.4 | 15.3 | 14.9 | 15.1 | 14.8 | 15.1 | 14.5 | 14.7 |
| yjiV   | 13.6 | 13.5 | 13.3 | 13.4 | 13.5 | 13.7 | 13.4 | 13.5 |
| yjiX   | 15.7 | 15.5 | 15.7 | 15.2 | 15.5 | 15.8 | 15.6 | 15.3 |
| yjiY   | 12.9 | 13.1 | 12.9 | 13.1 | 15.0 | 15.4 | 15.9 | 15.4 |
| yjiA   | 15.6 | 15.6 | 15.2 | 15.4 | 15.1 | 15.6 | 15.0 | 15.3 |
| yjiB   | 13.4 | 13.3 | 13.3 | 13.1 | 13.7 | 14.3 | 13.9 | 14.0 |
| yjiG   | 15.1 | 15.0 | 14.9 | 14.7 | 14.8 | 14.7 | 14.8 | 15.1 |
| yjiI   | 13.2 | 13.1 | 13.1 | 13.7 | 15.3 | 15.4 | 15.6 | 15.4 |
| yjiJ   | 13.8 | 13.8 | 13.7 | 13.5 | 13.7 | 13.7 | 13.7 | 13.6 |
| yjiK   | 17.0 | 16.8 | 17.0 | 17.0 | 16.3 | 16.4 | 16.4 | 16.5 |
| yjiL   | 12.9 | 12.9 | 12.9 | 13.1 | 13.0 | 13.0 | 13.0 | 12.9 |
| yjiM   | 13.4 | 13.3 | 13.2 | 13.2 | 12.9 | 13.2 | 13.0 | 12.9 |
| yjiN   | 13.0 | 12.9 | 12.8 | 13.4 | 13.1 | 12.9 | 13.0 | 12.8 |
| yjiP   | 13.7 | 13.6 | 13.4 | 13.1 | 14.5 | 15.2 | 14.7 | 14.5 |
| yjiQ   | 12.8 | 12.9 | 12.7 | 14.2 | 12.7 | 12.8 | 12.7 | 12.6 |

|               |      |      |      |      |      |      |      |      |
|---------------|------|------|------|------|------|------|------|------|
| <i>yjiU</i>   | 15.5 | 16.0 | 15.4 | 15.4 | 17.1 | 16.6 | 16.8 | 17.4 |
| <i>yjiV</i>   | 14.8 | 15.2 | 14.5 | 14.7 | 15.9 | 15.7 | 15.8 | 16.4 |
| <i>yjiW</i>   | 12.9 | 12.9 | 12.9 | 13.2 | 13.8 | 13.7 | 14.1 | 13.9 |
| <i>yjiX</i>   | 14.7 | 14.8 | 14.6 | 14.1 | 14.7 | 14.9 | 14.6 | 15.0 |
| <i>yjiY</i>   | 13.5 | 13.8 | 13.9 | 13.5 | 13.7 | 13.6 | 13.6 | 14.1 |
| <i>yjiZ</i>   | 13.4 | 19.6 | 19.3 | 13.1 | 13.2 | 19.7 | 19.4 | 13.1 |
| <i>yjiD</i>   | 15.0 | 14.7 | 14.5 | 15.0 | 14.7 | 14.5 | 14.5 | 14.4 |
| <i>ykfA</i>   | 13.2 | 13.1 | 13.1 | 13.1 | 13.2 | 13.2 | 13.3 | 13.0 |
| <i>ykfB</i>   | 14.0 | 13.9 | 14.0 | 13.5 | 13.8 | 13.9 | 14.0 | 13.6 |
| <i>ykfC</i>   | 13.5 | 13.5 | 13.4 | 13.7 | 13.6 | 13.6 | 13.7 | 13.5 |
| <i>ykfF</i>   | 12.9 | 12.9 | 12.8 | 13.3 | 13.0 | 12.9 | 12.8 | 13.0 |
| <i>ykfG</i>   | 12.8 | 12.9 | 12.7 | 12.8 | 12.9 | 12.9 | 12.9 | 12.7 |
| <i>ykfH</i>   | 12.8 | 12.9 | 12.7 | 12.9 | 13.0 | 12.8 | 12.8 | 12.6 |
| <i>ykfI</i>   | 12.8 | 12.8 | 12.8 | 13.2 | 12.9 | 12.9 | 12.8 | 12.7 |
| <i>ykfJ</i>   | 14.3 | 13.6 | 13.1 | 14.2 | 13.5 | 13.1 | 13.1 | 13.3 |
| <i>ykfK</i>   | 12.9 | 12.8 | 12.8 | 13.1 | 12.9 | 12.9 | 13.0 | 12.9 |
| <i>ykfL</i>   | 13.4 | 13.2 | 13.4 | 13.0 | 13.4 | 13.3 | 13.4 | 13.2 |
| <i>ykfM</i>   | 12.5 | 12.6 | 12.4 | 12.6 | 12.5 | 12.5 | 12.3 | 12.5 |
| <i>ykgA</i>   | 14.1 | 14.0 | 13.8 | 13.7 | 14.0 | 14.3 | 13.9 | 14.0 |
| <i>ykgB</i>   | 13.0 | 13.1 | 12.9 | 13.1 | 12.9 | 12.9 | 12.7 | 12.7 |
| <i>ykgC</i>   | 14.0 | 14.1 | 13.6 | 13.7 | 13.8 | 13.9 | 13.5 | 13.6 |
| <i>ykgD</i>   | 13.2 | 13.1 | 13.0 | 13.8 | 13.0 | 13.2 | 13.1 | 13.0 |
| <i>ykgE</i>   | 13.5 | 13.5 | 13.2 | 13.5 | 13.4 | 13.6 | 13.4 | 13.1 |
| <i>ykgF</i>   | 13.8 | 13.8 | 13.6 | 13.5 | 13.5 | 13.8 | 13.6 | 13.5 |
| <i>ykgG</i>   | 14.0 | 13.9 | 13.6 | 13.5 | 13.8 | 14.0 | 13.6 | 13.6 |
| <i>ykgH</i>   | 12.8 | 12.8 | 12.6 | 12.9 | 12.7 | 12.8 | 12.5 | 12.5 |
| <i>ykgI</i>   | 13.1 | 13.3 | 12.9 | 14.0 | 13.1 | 13.2 | 12.7 | 12.9 |
| <i>ykgJ</i>   | 14.8 | 13.8 | 14.2 | 14.0 | 14.2 | 13.7 | 14.2 | 14.4 |
| <i>ykgL</i>   | 13.3 | 13.4 | 13.1 | 13.1 | 13.1 | 13.5 | 12.9 | 13.1 |
| <i>ykgM</i>   | 13.7 | 13.5 | 13.3 | 13.4 | 13.3 | 13.5 | 13.0 | 13.2 |
| <i>ykgN</i>   | 15.2 | 15.1 | 14.7 | 14.5 | 14.9 | 15.5 | 14.8 | 15.1 |
| <i>ykgO</i>   | 13.8 | 13.7 | 13.4 | 13.3 | 13.3 | 13.7 | 13.2 | 13.3 |
| <i>ykgQ</i>   | 13.3 | 13.3 | 13.0 | 13.1 | 13.1 | 13.2 | 13.0 | 13.2 |
| <i>ykgR</i>   | 13.2 | 13.3 | 13.2 | 13.3 | 13.0 | 13.2 | 13.0 | 13.0 |
| <i>ykiA</i>   | 14.0 | 14.2 | 13.7 | 14.1 | 14.1 | 14.5 | 13.9 | 14.1 |
| <i>ykiB</i>   | 12.9 | 12.8 | 12.6 | 13.0 | 12.9 | 12.8 | 12.6 | 12.8 |
| <i>ylaB</i>   | 13.7 | 13.7 | 13.4 | 13.1 | 13.3 | 13.8 | 13.3 | 13.5 |
| <i>ylaC</i>   | 16.1 | 16.0 | 15.9 | 15.5 | 13.6 | 14.1 | 13.5 | 13.6 |
| <i>ylbE_1</i> | 13.1 | 13.2 | 13.1 | 13.5 | 13.3 | 13.3 | 13.3 | 13.0 |
| <i>ylbE_2</i> | 12.7 | 12.8 | 12.8 | 13.1 | 12.9 | 12.9 | 12.9 | 12.7 |
| <i>ylbF</i>   | 12.8 | 12.7 | 12.8 | 12.9 | 13.0 | 12.8 | 13.0 | 12.8 |
| <i>ylbG</i>   | 14.3 | 14.4 | 13.9 | 13.8 | 14.0 | 14.5 | 14.1 | 14.4 |
| <i>ylbH</i>   | 13.2 | 13.2 | 13.0 | 13.4 | 13.6 | 13.5 | 13.1 | 13.1 |
| <i>ylcG</i>   | 13.3 | 13.3 | 13.1 | 13.3 | 13.1 | 13.3 | 13.0 | 13.0 |
| <i>ylcH</i>   | 13.3 | 13.3 | 13.2 | 14.2 | 13.5 | 13.6 | 13.3 | 13.5 |
| <i>ylcI</i>   | 13.3 | 13.3 | 13.2 | 13.2 | 14.2 | 14.3 | 13.9 | 14.0 |
| <i>yliE</i>   | 14.5 | 14.4 | 14.1 | 14.1 | 14.2 | 14.8 | 14.1 | 14.3 |
| <i>yliF</i>   | 14.5 | 14.3 | 14.0 | 13.9 | 13.9 | 14.5 | 13.9 | 14.1 |
| <i>yliI</i>   | 13.7 | 13.6 | 13.4 | 13.4 | 13.5 | 13.7 | 13.4 | 13.5 |
| <i>yliL</i>   | 13.0 | 13.1 | 13.0 | 12.9 | 14.0 | 13.3 | 13.2 | 12.9 |
| <i>ymbA</i>   | 14.3 | 14.3 | 14.1 | 14.0 | 14.1 | 14.1 | 13.9 | 14.0 |
| <i>ymcE</i>   | 14.7 | 14.8 | 14.8 | 14.2 | 14.5 | 14.7 | 14.2 | 14.3 |
| <i>ymdA</i>   | 13.5 | 13.6 | 13.3 | 13.8 | 13.3 | 13.5 | 13.2 | 13.2 |
| <i>ymdB</i>   | 15.0 | 15.2 | 14.8 | 14.5 | 15.1 | 15.2 | 14.8 | 14.9 |
| <i>ymdC</i>   | 14.1 | 14.1 | 13.9 | 13.8 | 13.9 | 14.1 | 13.9 | 14.0 |
| <i>ymdE</i>   | 12.8 | 12.8 | 12.6 | 13.0 | 12.9 | 12.9 | 12.7 | 12.8 |
| <i>ymdF</i>   | 15.5 | 15.6 | 14.9 | 15.4 | 14.5 | 15.2 | 14.3 | 14.5 |
| <i>ymfA</i>   | 13.6 | 13.3 | 13.3 | 13.1 | 13.3 | 13.4 | 13.2 | 13.2 |
| <i>ymfD</i>   | 13.2 | 13.2 | 13.1 | 12.8 | 12.8 | 12.9 | 12.6 | 12.7 |
| <i>ymfE</i>   | 13.6 | 13.7 | 13.6 | 13.1 | 13.3 | 13.5 | 13.1 | 13.1 |
| <i>ymfH</i>   | 13.0 | 13.4 | 13.2 | 12.9 | 13.1 | 13.2 | 13.1 | 12.9 |

|               |      |      |      |      |      |      |      |      |
|---------------|------|------|------|------|------|------|------|------|
| <i>ymfI</i>   | 16.9 | 17.0 | 16.2 | 16.8 | 16.7 | 17.3 | 16.3 | 16.7 |
| <i>ymfJ</i>   | 13.7 | 14.3 | 13.7 | 13.4 | 13.3 | 13.8 | 13.3 | 13.2 |
| <i>ymfK</i>   | 15.5 | 15.4 | 15.2 | 15.0 | 15.3 | 15.7 | 15.0 | 15.2 |
| <i>ymfL</i>   | 12.9 | 13.5 | 13.0 | 13.1 | 12.8 | 13.0 | 12.8 | 12.7 |
| <i>ymfM</i>   | 13.4 | 13.9 | 13.6 | 14.0 | 13.5 | 13.4 | 13.4 | 12.9 |
| <i>ymfN</i>   | 12.8 | 13.2 | 13.0 | 13.4 | 13.3 | 13.0 | 13.0 | 12.8 |
| <i>ymfO</i>   | 12.9 | 13.0 | 13.0 | 13.6 | 13.0 | 12.9 | 13.1 | 12.9 |
| <i>ymfP</i>   | 12.8 | 12.9 | 12.8 | 13.4 | 13.3 | 12.8 | 13.0 | 12.6 |
| <i>ymfQ</i>   | 12.7 | 12.7 | 12.7 | 13.5 | 12.9 | 12.8 | 12.9 | 12.6 |
| <i>ymfR</i>   | 12.9 | 13.2 | 13.2 | 14.0 | 13.5 | 12.9 | 13.5 | 12.8 |
| <i>ymfS</i>   | 13.2 | 13.3 | 13.1 | 13.7 | 13.0 | 13.4 | 13.1 | 13.1 |
| <i>ymfT</i>   | 13.8 | 14.4 | 13.8 | 14.0 | 13.7 | 13.8 | 13.6 | 13.3 |
| <i>ymgA</i>   | 14.4 | 14.3 | 14.0 | 13.8 | 13.2 | 13.3 | 13.0 | 13.0 |
| <i>ymgC</i>   | 13.3 | 13.2 | 13.1 | 13.0 | 12.8 | 12.9 | 12.6 | 12.8 |
| <i>ymgD</i>   | 16.0 | 15.2 | 15.0 | 15.8 | 16.3 | 16.3 | 16.1 | 16.4 |
| <i>ymgE</i>   | 14.5 | 14.6 | 14.3 | 14.2 | 14.0 | 14.3 | 13.8 | 14.2 |
| <i>ymgF</i>   | 13.3 | 13.2 | 13.1 | 13.4 | 13.4 | 13.3 | 13.1 | 13.2 |
| <i>ymgG</i>   | 15.8 | 15.0 | 15.3 | 15.8 | 16.6 | 16.1 | 16.3 | 16.2 |
| <i>ymgH</i>   | 13.3 | 13.2 | 13.1 | 13.4 | 13.4 | 13.3 | 13.3 | 13.0 |
| <i>ymgI</i>   | 14.8 | 13.9 | 14.1 | 13.8 | 14.9 | 15.1 | 14.7 | 14.6 |
| <i>ymgJ</i>   | 13.3 | 13.2 | 13.0 | 13.3 | 13.1 | 13.3 | 13.1 | 13.1 |
| <i>ymiA</i>   | 18.2 | 17.7 | 17.4 | 17.7 | 17.3 | 17.2 | 16.2 | 17.4 |
| <i>ymjA</i>   | 15.5 | 15.4 | 15.1 | 14.9 | 15.3 | 15.5 | 15.1 | 15.2 |
| <i>ymjB</i>   | 13.0 | 13.1 | 12.9 | 13.3 | 13.1 | 13.1 | 12.9 | 13.0 |
| <i>ymjC</i>   | 14.4 | 14.4 | 13.8 | 13.9 | 14.1 | 14.6 | 13.9 | 14.0 |
| <i>ymjD</i>   | 14.6 | 14.6 | 14.0 | 14.1 | 14.2 | 14.7 | 14.1 | 14.4 |
| <i>ynaA</i>   | 13.0 | 13.0 | 12.8 | 13.1 | 13.1 | 13.3 | 13.0 | 13.0 |
| <i>ynaE</i>   | 13.5 | 13.6 | 13.2 | 13.2 | 13.6 | 13.9 | 13.3 | 13.4 |
| <i>ynaI</i>   | 15.1 | 15.1 | 14.8 | 14.7 | 15.2 | 15.5 | 15.1 | 15.5 |
| <i>ynaJ</i>   | 17.7 | 17.8 | 17.4 | 17.6 | 15.5 | 16.2 | 15.2 | 16.0 |
| <i>ynaK</i>   | 13.4 | 13.4 | 13.3 | 13.5 | 13.4 | 13.7 | 13.4 | 13.3 |
| <i>ynbA</i>   | 12.4 | 12.5 | 12.3 | 12.5 | 12.6 | 12.5 | 12.4 | 12.4 |
| <i>ynbB</i>   | 12.5 | 12.5 | 12.4 | 12.7 | 12.6 | 12.6 | 12.4 | 12.5 |
| <i>ynbC</i>   | 13.1 | 13.0 | 12.9 | 13.0 | 13.1 | 13.1 | 13.0 | 13.0 |
| <i>ynbD</i>   | 13.3 | 13.3 | 13.1 | 13.3 | 13.5 | 13.4 | 13.4 | 13.3 |
| <i>ynbE</i>   | 15.4 | 15.3 | 14.5 | 15.0 | 15.0 | 15.4 | 14.5 | 15.2 |
| <i>ynbG</i>   | 13.4 | 13.3 | 13.1 | 13.4 | 13.3 | 13.5 | 13.1 | 13.5 |
| <i>yncA</i>   | 15.8 | 15.8 | 15.4 | 15.4 | 16.5 | 16.6 | 16.3 | 16.7 |
| <i>yncB</i>   | 15.1 | 15.2 | 14.9 | 14.8 | 15.3 | 14.9 | 14.7 | 14.9 |
| <i>yncD</i>   | 14.2 | 14.3 | 14.0 | 13.9 | 12.9 | 13.2 | 12.9 | 12.7 |
| <i>yncE</i>   | 16.2 | 19.4 | 17.9 | 15.9 | 13.1 | 19.5 | 17.3 | 13.4 |
| <i>yncG</i>   | 13.5 | 13.6 | 13.2 | 13.3 | 13.3 | 13.4 | 13.2 | 13.5 |
| <i>yncH</i>   | 12.8 | 12.9 | 12.7 | 12.9 | 12.9 | 12.8 | 12.6 | 12.7 |
| <i>yncI</i>   | 13.0 | 13.0 | 12.8 | 13.6 | 12.9 | 13.3 | 12.7 | 12.7 |
| <i>yncJ</i>   | 14.0 | 13.9 | 13.4 | 14.1 | 14.0 | 13.7 | 13.5 | 13.3 |
| <i>yncK_1</i> | 13.0 | 12.9 | 12.9 | 13.4 | 13.1 | 13.0 | 12.9 | 13.2 |
| <i>yncK_2</i> | 12.9 | 13.0 | 12.7 | 12.9 | 12.9 | 13.0 | 12.9 | 12.8 |
| <i>yncL</i>   | 18.4 | 18.1 | 17.3 | 17.5 | 18.3 | 18.7 | 17.6 | 18.9 |
| <i>yncM</i>   | 13.2 | 13.1 | 12.8 | 13.3 | 12.9 | 12.9 | 12.8 | 12.8 |
| <i>yneE</i>   | 14.6 | 14.8 | 14.0 | 13.9 | 13.8 | 14.5 | 13.8 | 14.2 |
| <i>yneF</i>   | 13.3 | 13.5 | 13.2 | 13.5 | 13.4 | 13.6 | 13.4 | 13.6 |
| <i>yneG</i>   | 14.5 | 14.5 | 14.2 | 14.3 | 14.4 | 14.7 | 14.5 | 14.9 |
| <i>yneH</i>   | 14.8 | 14.7 | 14.5 | 14.3 | 14.8 | 14.8 | 14.6 | 14.9 |
| <i>yneJ</i>   | 13.8 | 13.7 | 13.6 | 13.5 | 13.8 | 13.8 | 13.8 | 13.8 |
| <i>yneK</i>   | 12.9 | 12.8 | 12.7 | 12.9 | 12.8 | 13.0 | 12.7 | 12.6 |
| <i>yneL</i>   | 13.1 | 13.1 | 13.0 | 13.1 | 13.1 | 13.2 | 13.1 | 13.0 |
| <i>yneM</i>   | 17.1 | 16.9 | 16.4 | 15.9 | 17.7 | 17.6 | 16.6 | 17.0 |
| <i>ynfA</i>   | 14.3 | 14.2 | 14.0 | 13.5 | 14.3 | 14.2 | 14.0 | 14.3 |
| <i>ynfB</i>   | 17.7 | 17.8 | 17.4 | 17.6 | 17.8 | 18.0 | 17.7 | 17.8 |
| <i>ynfC</i>   | 15.0 | 15.0 | 14.5 | 14.6 | 15.0 | 15.1 | 14.5 | 14.7 |
| <i>ynfD</i>   | 15.4 | 15.6 | 14.8 | 14.9 | 14.7 | 15.5 | 14.4 | 15.1 |



|             |      |      |      |      |      |      |      |      |
|-------------|------|------|------|------|------|------|------|------|
| <i>ynfE</i> | 12.9 | 12.8 | 12.8 | 13.0 | 16.1 | 15.4 | 16.2 | 16.0 |
| <i>ynfF</i> | 13.7 | 13.0 | 13.5 | 13.5 | 17.2 | 14.5 | 17.2 | 17.0 |
| <i>ynfG</i> | 13.6 | 13.2 | 13.5 | 13.2 | 16.6 | 14.4 | 16.8 | 16.9 |
| <i>ynfH</i> | 13.9 | 13.7 | 13.9 | 13.3 | 16.7 | 14.4 | 16.7 | 16.8 |
| <i>ynfK</i> | 13.8 | 13.7 | 13.6 | 13.4 | 17.1 | 17.1 | 16.8 | 17.1 |
| <i>ynfL</i> | 13.5 | 13.5 | 13.3 | 13.5 | 13.5 | 13.5 | 13.5 | 13.4 |
| <i>ynfM</i> | 13.6 | 15.1 | 13.3 | 13.0 | 13.3 | 14.4 | 13.3 | 13.5 |
| <i>ynfN</i> | 13.3 | 13.2 | 13.0 | 13.1 | 13.2 | 13.3 | 13.1 | 12.9 |
| <i>ynfO</i> | 13.3 | 13.4 | 13.2 | 13.4 | 14.0 | 14.5 | 13.8 | 13.8 |
| <i>ynfP</i> | 13.1 | 13.0 | 12.8 | 13.3 | 13.0 | 12.9 | 12.9 | 13.0 |
| <i>ynhF</i> | 17.8 | 17.7 | 17.9 | 16.9 | 16.3 | 17.7 | 15.4 | 15.8 |
| <i>ynhG</i> | 15.5 | 15.7 | 15.5 | 15.5 | 15.4 | 15.6 | 15.3 | 15.4 |
| <i>yniA</i> | 15.4 | 15.4 | 15.1 | 15.3 | 15.8 | 15.8 | 15.9 | 16.0 |
| <i>yniB</i> | 15.8 | 15.7 | 15.2 | 15.6 | 15.6 | 15.9 | 15.4 | 15.7 |
| <i>yniC</i> | 15.8 | 15.7 | 15.5 | 15.8 | 15.4 | 15.7 | 15.4 | 15.3 |
| <i>yniD</i> | 14.1 | 14.1 | 13.8 | 13.5 | 14.0 | 14.5 | 13.9 | 14.1 |
| <i>ynjA</i> | 13.7 | 13.7 | 13.7 | 13.2 | 15.3 | 15.1 | 15.4 | 15.5 |
| <i>ynjB</i> | 13.7 | 13.7 | 13.6 | 13.4 | 15.4 | 15.2 | 15.5 | 15.5 |
| <i>ynjC</i> | 13.0 | 13.0 | 13.0 | 13.0 | 14.0 | 13.9 | 14.0 | 14.0 |
| <i>ynjD</i> | 13.5 | 13.4 | 13.3 | 13.1 | 14.1 | 14.3 | 14.1 | 14.4 |
| <i>ynjE</i> | 14.0 | 13.7 | 13.8 | 13.8 | 17.2 | 16.9 | 17.2 | 17.1 |
| <i>ynjF</i> | 13.9 | 13.9 | 13.8 | 13.9 | 13.7 | 14.1 | 13.9 | 14.1 |
| <i>ynjH</i> | 13.5 | 13.7 | 13.4 | 13.0 | 13.3 | 13.5 | 13.3 | 13.1 |
| <i>ynjI</i> | 13.1 | 13.1 | 12.9 | 13.2 | 13.0 | 13.0 | 12.8 | 13.0 |
| <i>yoaA</i> | 14.0 | 14.1 | 13.9 | 13.7 | 13.9 | 14.2 | 13.9 | 13.9 |
| <i>yoaB</i> | 17.8 | 17.8 | 17.5 | 17.7 | 17.3 | 17.5 | 17.1 | 17.3 |
| <i>yoaC</i> | 15.8 | 15.6 | 15.3 | 15.3 | 16.1 | 16.0 | 15.1 | 15.4 |
| <i>yoaD</i> | 13.1 | 13.2 | 13.0 | 13.2 | 13.1 | 13.1 | 13.1 | 13.1 |
| <i>yoaE</i> | 14.6 | 14.4 | 14.6 | 14.5 | 14.2 | 14.3 | 14.2 | 14.2 |
| <i>yoaF</i> | 14.5 | 14.2 | 14.2 | 13.9 | 14.6 | 14.4 | 14.2 | 14.2 |
| <i>yoaG</i> | 13.6 | 13.8 | 13.3 | 14.0 | 13.3 | 13.3 | 13.3 | 13.3 |
| <i>yoaH</i> | 15.5 | 15.7 | 15.1 | 14.8 | 15.7 | 15.6 | 15.0 | 15.4 |
| <i>yoaI</i> | 13.5 | 13.6 | 13.4 | 13.9 | 13.8 | 13.4 | 13.4 | 13.5 |
| <i>yoaJ</i> | 16.6 | 16.6 | 15.4 | 14.8 | 15.3 | 16.4 | 14.8 | 15.6 |
| <i>yoaK</i> | 17.2 | 17.1 | 16.4 | 16.5 | 16.1 | 17.4 | 15.8 | 16.5 |
| <i>yobA</i> | 16.3 | 16.2 | 16.2 | 16.1 | 15.1 | 15.3 | 14.9 | 15.1 |
| <i>yobB</i> | 15.0 | 15.0 | 14.8 | 14.9 | 14.9 | 15.1 | 14.8 | 14.8 |
| <i>yobD</i> | 14.7 | 14.3 | 14.5 | 14.3 | 14.4 | 14.4 | 14.4 | 14.7 |
| <i>yobF</i> | 20.1 | 19.8 | 19.6 | 19.5 | 20.1 | 20.1 | 19.6 | 20.0 |
| <i>yobH</i> | 14.8 | 14.9 | 14.2 | 14.2 | 14.0 | 14.7 | 13.7 | 14.1 |
| <i>yobI</i> | 13.3 | 13.4 | 13.3 | 13.3 | 13.4 | 13.5 | 13.3 | 13.4 |
| <i>yodB</i> | 14.5 | 14.1 | 14.6 | 13.9 | 14.1 | 13.4 | 13.1 | 14.6 |
| <i>yodC</i> | 15.6 | 15.5 | 15.4 | 15.5 | 16.3 | 15.7 | 15.6 | 15.7 |
| <i>yodD</i> | 15.9 | 16.1 | 15.0 | 15.5 | 15.4 | 15.8 | 14.6 | 15.5 |
| <i>yoaE</i> | 14.7 | 15.3 | 15.1 | 14.4 | 14.8 | 18.4 | 18.3 | 14.8 |
| <i>yoaB</i> | 16.1 | 16.1 | 15.4 | 15.9 | 16.2 | 16.7 | 15.7 | 16.0 |
| <i>yoaE</i> | 14.0 | 14.0 | 13.8 | 13.7 | 14.1 | 14.1 | 13.7 | 14.0 |
| <i>yoaF</i> | 13.0 | 13.0 | 12.8 | 13.0 | 13.0 | 13.1 | 12.9 | 12.9 |
| <i>yoaI</i> | 18.1 | 17.7 | 18.4 | 17.7 | 16.9 | 17.0 | 17.0 | 16.8 |
| <i>yohC</i> | 13.9 | 14.4 | 13.7 | 13.4 | 13.9 | 14.4 | 13.7 | 14.1 |
| <i>yohD</i> | 14.7 | 14.8 | 14.5 | 14.6 | 15.0 | 14.8 | 14.7 | 14.8 |
| <i>yohF</i> | 14.1 | 14.0 | 13.6 | 14.2 | 14.0 | 13.8 | 13.6 | 13.8 |
| <i>yohH</i> | 13.3 | 13.4 | 13.3 | 13.5 | 13.6 | 13.1 | 13.6 | 13.1 |
| <i>yohJ</i> | 13.9 | 14.7 | 13.7 | 13.7 | 14.0 | 15.2 | 14.5 | 14.4 |
| <i>yohK</i> | 13.7 | 14.2 | 13.4 | 13.2 | 13.6 | 14.6 | 14.1 | 14.1 |
| <i>yohN</i> | 15.4 | 15.5 | 15.2 | 14.9 | 15.0 | 15.3 | 15.2 | 15.2 |
| <i>yohO</i> | 15.1 | 15.1 | 14.8 | 14.4 | 14.0 | 14.2 | 13.7 | 14.1 |
| <i>yohP</i> | 15.5 | 15.9 | 15.1 | 14.3 | 14.3 | 14.7 | 13.7 | 14.1 |
| <i>yojI</i> | 14.5 | 15.7 | 15.4 | 13.9 | 12.9 | 15.4 | 15.1 | 12.8 |
| <i>yojO</i> | 13.1 | 13.1 | 13.0 | 13.1 | 13.4 | 13.3 | 13.2 | 13.1 |
| <i>ypaA</i> | 16.8 | 16.9 | 16.2 | 17.0 | 16.8 | 17.0 | 16.4 | 16.9 |

|               |      |      |      |      |      |      |      |      |
|---------------|------|------|------|------|------|------|------|------|
| <i>ypaB</i>   | 13.1 | 13.1 | 12.9 | 13.3 | 13.1 | 13.3 | 12.9 | 12.8 |
| <i>ypdA</i>   | 13.7 | 13.8 | 13.5 | 13.4 | 13.7 | 14.0 | 13.6 | 13.6 |
| <i>ypdB</i>   | 15.0 | 15.2 | 14.7 | 14.8 | 14.8 | 15.5 | 14.8 | 15.1 |
| <i>ypdC</i>   | 13.6 | 13.7 | 13.4 | 13.9 | 13.7 | 13.8 | 13.6 | 13.7 |
| <i>ypdE</i>   | 12.8 | 12.8 | 12.7 | 13.0 | 12.8 | 12.7 | 12.9 | 12.7 |
| <i>ypdF</i>   | 12.7 | 12.7 | 12.6 | 12.9 | 12.8 | 12.8 | 12.8 | 12.6 |
| <i>ypdI</i>   | 13.0 | 13.0 | 12.9 | 13.4 | 13.0 | 13.2 | 12.8 | 12.9 |
| <i>ypdJ</i>   | 13.3 | 13.4 | 13.1 | 13.1 | 13.3 | 13.3 | 13.2 | 13.1 |
| <i>ypdK</i>   | 15.1 | 15.2 | 14.6 | 14.2 | 15.1 | 15.4 | 14.8 | 15.5 |
| <i>ypeA</i>   | 15.6 | 15.6 | 15.1 | 15.3 | 15.8 | 15.5 | 15.3 | 15.8 |
| <i>ypeB</i>   | 14.6 | 14.5 | 14.0 | 14.4 | 14.1 | 14.4 | 14.1 | 14.4 |
| <i>ypeC</i>   | 13.8 | 13.7 | 13.6 | 13.2 | 13.6 | 13.5 | 13.3 | 13.2 |
| <i>ypfG</i>   | 13.3 | 13.2 | 13.1 | 13.0 | 13.2 | 13.2 | 13.2 | 13.2 |
| <i>ypfH</i>   | 14.4 | 14.6 | 14.2 | 14.1 | 14.5 | 14.6 | 14.4 | 14.5 |
| <i>ypfJ</i>   | 15.7 | 15.6 | 15.4 | 15.3 | 15.9 | 15.8 | 15.7 | 15.7 |
| <i>ypfM</i>   | 15.1 | 14.9 | 15.5 | 14.4 | 16.5 | 16.7 | 15.4 | 15.8 |
| <i>ypfN</i>   | 15.3 | 15.2 | 14.8 | 14.8 | 15.2 | 15.3 | 14.9 | 15.2 |
| <i>yp hA</i>  | 15.0 | 14.9 | 14.9 | 14.4 | 15.0 | 14.8 | 14.7 | 15.1 |
| <i>yp hB</i>  | 13.3 | 13.3 | 13.4 | 13.3 | 13.7 | 13.3 | 13.5 | 13.2 |
| <i>yp hC</i>  | 13.4 | 13.4 | 13.3 | 13.1 | 13.6 | 13.5 | 13.6 | 13.3 |
| <i>yp hD</i>  | 12.9 | 12.9 | 12.9 | 13.0 | 13.1 | 12.9 | 13.1 | 12.8 |
| <i>yp hE</i>  | 12.8 | 12.9 | 12.8 | 13.4 | 13.1 | 12.9 | 13.1 | 12.7 |
| <i>yp hF</i>  | 13.0 | 13.1 | 12.8 | 13.4 | 13.3 | 13.1 | 12.8 | 12.7 |
| <i>yp hG</i>  | 12.8 | 12.8 | 12.7 | 13.1 | 13.0 | 12.7 | 12.8 | 12.6 |
| <i>yp hH</i>  | 13.7 | 13.8 | 13.5 | 13.4 | 13.5 | 13.8 | 13.5 | 13.4 |
| <i>ypjA</i>   | 13.5 | 13.5 | 13.2 | 13.5 | 13.6 | 13.6 | 13.3 | 13.2 |
| <i>ypjB</i>   | 12.7 | 12.7 | 12.5 | 12.9 | 12.7 | 12.7 | 12.4 | 12.9 |
| <i>ypjC</i>   | 12.7 | 12.8 | 12.5 | 12.9 | 12.8 | 12.6 | 12.5 | 12.6 |
| <i>ypjD</i>   | 15.2 | 15.3 | 15.0 | 14.6 | 15.2 | 15.6 | 15.2 | 15.5 |
| <i>ypjF</i>   | 13.5 | 13.3 | 13.1 | 13.1 | 13.1 | 13.1 | 12.9 | 13.0 |
| <i>ypjJ</i>   | 12.9 | 12.9 | 12.9 | 12.8 | 13.0 | 13.0 | 12.9 | 12.9 |
| <i>ypjK</i>   | 13.1 | 13.2 | 13.1 | 13.1 | 13.4 | 13.1 | 13.1 | 12.7 |
| <i>ypjM_1</i> | 13.2 | 13.1 | 13.1 | 12.9 | 13.2 | 13.2 | 13.2 | 13.4 |
| <i>ypjM_2</i> | 13.1 | 13.1 | 13.1 | 12.8 | 13.4 | 13.3 | 13.2 | 13.2 |
| <i>ypjM_3</i> | 13.8 | 13.7 | 13.5 | 13.8 | 13.8 | 13.9 | 13.9 | 13.7 |
| <i>yqaA</i>   | 16.4 | 16.2 | 16.0 | 16.1 | 16.3 | 16.4 | 16.1 | 16.3 |
| <i>yqaB</i>   | 15.5 | 15.4 | 15.1 | 15.4 | 15.5 | 15.6 | 15.4 | 15.8 |
| <i>yqaE</i>   | 16.1 | 16.0 | 15.7 | 15.3 | 15.0 | 15.3 | 14.6 | 15.3 |
| <i>yqcA</i>   | 15.3 | 15.3 | 15.1 | 14.8 | 15.2 | 15.2 | 14.9 | 15.3 |
| <i>yqcC</i>   | 15.5 | 15.4 | 15.2 | 15.0 | 14.9 | 15.3 | 14.8 | 15.1 |
| <i>yqcE</i>   | 12.6 | 12.7 | 12.6 | 13.0 | 12.7 | 12.6 | 12.7 | 12.5 |
| <i>yqcG</i>   | 13.1 | 13.1 | 12.8 | 13.1 | 13.0 | 13.0 | 12.8 | 12.9 |
| <i>yqeA</i>   | 13.2 | 13.3 | 13.1 | 13.1 | 13.3 | 13.3 | 13.1 | 13.1 |
| <i>yqeB</i>   | 13.2 | 13.2 | 13.0 | 13.4 | 13.3 | 13.2 | 13.2 | 13.1 |
| <i>yqeC</i>   | 12.8 | 12.8 | 12.7 | 13.1 | 13.0 | 12.9 | 12.8 | 12.8 |
| <i>yqeF</i>   | 14.7 | 14.6 | 14.9 | 14.4 | 13.1 | 13.1 | 13.1 | 12.9 |
| <i>yqeG</i>   | 13.0 | 13.1 | 12.9 | 12.9 | 12.8 | 13.0 | 12.8 | 12.8 |
| <i>yqeH</i>   | 12.9 | 13.0 | 12.8 | 12.9 | 12.8 | 13.0 | 12.7 | 12.9 |
| <i>yqeI</i>   | 13.1 | 13.0 | 12.9 | 13.4 | 13.7 | 13.7 | 13.4 | 13.4 |
| <i>yqeJ</i>   | 12.7 | 12.8 | 12.6 | 12.6 | 13.1 | 13.0 | 12.7 | 12.8 |
| <i>yqeK</i>   | 12.8 | 13.0 | 12.7 | 13.2 | 12.9 | 12.8 | 12.6 | 12.8 |
| <i>yqeL</i>   | 13.2 | 13.1 | 13.0 | 13.2 | 13.2 | 13.2 | 13.1 | 13.2 |
| <i>yqfA</i>   | 14.8 | 15.5 | 15.3 | 14.5 | 14.6 | 15.8 | 15.6 | 14.9 |
| <i>yqfB</i>   | 16.2 | 16.2 | 15.6 | 15.7 | 16.0 | 16.4 | 15.7 | 16.1 |
| <i>yqfE</i>   | 13.9 | 13.8 | 13.7 | 14.1 | 14.1 | 14.0 | 13.8 | 13.9 |
| <i>yqfG</i>   | 13.1 | 13.0 | 12.9 | 13.1 | 13.0 | 13.1 | 12.8 | 13.1 |
| <i>yqgA</i>   | 13.2 | 13.3 | 13.1 | 13.1 | 13.5 | 13.6 | 13.7 | 13.7 |
| <i>yqgB</i>   | 17.0 | 17.1 | 16.5 | 17.0 | 16.1 | 16.7 | 16.0 | 16.3 |
| <i>yqgC</i>   | 12.8 | 12.8 | 12.7 | 12.9 | 12.9 | 12.9 | 12.9 | 12.8 |
| <i>yqgD</i>   | 13.0 | 13.2 | 13.4 | 12.9 | 13.1 | 13.1 | 13.0 | 12.9 |
| <i>yqgE</i>   | 16.4 | 16.5 | 16.3 | 16.2 | 16.5 | 16.8 | 16.6 | 16.7 |

|             |      |      |      |      |      |      |      |      |
|-------------|------|------|------|------|------|------|------|------|
| <i>yqgF</i> | 15.4 | 15.5 | 15.1 | 15.2 | 15.3 | 15.6 | 15.4 | 15.6 |
| <i>yqhA</i> | 17.1 | 17.0 | 16.4 | 17.0 | 15.6 | 16.2 | 15.3 | 15.9 |
| <i>yqhC</i> | 14.3 | 14.2 | 13.8 | 13.8 | 13.9 | 14.1 | 13.7 | 13.7 |
| <i>yqhD</i> | 15.5 | 15.3 | 15.3 | 15.3 | 15.9 | 16.2 | 16.2 | 16.2 |
| <i>yqhG</i> | 13.2 | 13.2 | 13.0 | 13.2 | 13.2 | 13.4 | 13.0 | 13.1 |
| <i>yqhH</i> | 13.4 | 13.3 | 13.1 | 13.2 | 13.2 | 13.5 | 13.2 | 13.2 |
| <i>yqiA</i> | 15.5 | 15.7 | 15.1 | 15.3 | 15.3 | 16.0 | 15.3 | 15.5 |
| <i>yqiB</i> | 16.8 | 17.0 | 16.0 | 16.7 | 16.6 | 17.2 | 16.3 | 16.7 |
| <i>yqiC</i> | 17.7 | 17.7 | 17.1 | 17.5 | 17.1 | 17.7 | 16.7 | 17.0 |
| <i>yqiG</i> | 12.9 | 12.9 | 12.7 | 13.2 | 12.9 | 13.0 | 12.7 | 12.8 |
| <i>yqiH</i> | 12.8 | 12.7 | 12.6 | 12.9 | 12.7 | 12.8 | 12.6 | 12.7 |
| <i>yqiI</i> | 12.9 | 12.9 | 12.7 | 13.2 | 12.9 | 12.9 | 12.7 | 12.7 |
| <i>yqiJ</i> | 12.8 | 13.0 | 12.8 | 12.6 | 13.0 | 12.9 | 12.6 | 12.7 |
| <i>yqiK</i> | 12.9 | 12.9 | 12.7 | 13.4 | 13.0 | 12.9 | 12.8 | 12.7 |
| <i>yqjA</i> | 15.7 | 15.5 | 15.3 | 15.0 | 15.5 | 15.8 | 15.3 | 15.5 |
| <i>yqjC</i> | 18.1 | 17.9 | 17.5 | 17.7 | 17.8 | 17.9 | 17.2 | 17.7 |
| <i>yqjD</i> | 18.0 | 18.1 | 17.7 | 18.1 | 18.1 | 17.4 | 17.5 | 17.8 |
| <i>yqjE</i> | 17.6 | 17.6 | 17.3 | 17.5 | 17.5 | 17.2 | 17.2 | 17.7 |
| <i>yqjF</i> | 13.5 | 13.4 | 13.3 | 13.1 | 13.3 | 13.5 | 13.3 | 13.2 |
| <i>yqjG</i> | 14.5 | 14.5 | 14.2 | 14.2 | 14.1 | 14.3 | 14.0 | 14.1 |
| <i>yqjH</i> | 14.3 | 16.4 | 16.6 | 13.8 | 13.2 | 16.0 | 16.9 | 13.0 |
| <i>yqjI</i> | 14.9 | 15.2 | 15.3 | 14.4 | 15.5 | 15.1 | 17.0 | 15.1 |
| <i>yqjK</i> | 15.1 | 15.2 | 15.3 | 14.9 | 15.2 | 14.8 | 14.9 | 15.6 |
| <i>yraH</i> | 13.2 | 13.2 | 13.0 | 13.3 | 12.9 | 13.1 | 12.8 | 12.9 |
| <i>yraI</i> | 12.7 | 12.7 | 12.5 | 13.1 | 12.8 | 12.7 | 12.6 | 12.6 |
| <i>yraJ</i> | 13.0 | 13.0 | 12.8 | 13.5 | 13.0 | 13.1 | 12.8 | 12.9 |
| <i>yraK</i> | 13.0 | 13.0 | 12.9 | 13.1 | 12.9 | 13.0 | 12.9 | 12.8 |
| <i>yraN</i> | 15.6 | 15.6 | 15.5 | 15.5 | 15.7 | 15.7 | 15.5 | 15.6 |
| <i>yraP</i> | 16.0 | 16.1 | 15.9 | 16.0 | 16.1 | 16.2 | 16.0 | 15.9 |
| <i>yraQ</i> | 14.5 | 15.1 | 15.1 | 14.5 | 14.9 | 14.4 | 14.7 | 14.6 |
| <i>yraR</i> | 14.0 | 14.0 | 13.9 | 13.9 | 14.2 | 13.9 | 13.9 | 13.9 |
| <i>yrbA</i> | 17.7 | 17.6 | 17.2 | 17.3 | 17.7 | 17.8 | 17.2 | 17.4 |
| <i>yrbG</i> | 15.0 | 14.7 | 14.7 | 14.5 | 15.1 | 15.0 | 14.8 | 14.9 |
| <i>yrbL</i> | 14.5 | 14.8 | 14.0 | 14.0 | 14.9 | 16.7 | 16.1 | 14.6 |
| <i>yrbN</i> | 18.0 | 17.8 | 16.9 | 18.1 | 17.8 | 18.3 | 17.7 | 18.0 |
| <i>yrdA</i> | 16.6 | 16.5 | 16.3 | 16.4 | 16.6 | 16.6 | 16.2 | 16.4 |
| <i>yrdB</i> | 15.1 | 14.9 | 14.6 | 14.4 | 14.7 | 14.8 | 14.3 | 14.5 |
| <i>yrdD</i> | 16.7 | 16.6 | 16.2 | 16.5 | 16.6 | 16.9 | 16.5 | 16.5 |
| <i>yrfF</i> | 14.4 | 14.3 | 14.1 | 14.2 | 13.9 | 14.2 | 13.8 | 14.0 |
| <i>yrfG</i> | 15.8 | 15.7 | 15.7 | 15.6 | 15.7 | 15.6 | 15.3 | 15.4 |
| <i>yrhA</i> | 13.6 | 13.6 | 13.5 | 13.5 | 13.8 | 13.6 | 13.6 | 13.7 |
| <i>yrhB</i> | 13.3 | 13.2 | 12.8 | 13.1 | 13.4 | 13.4 | 12.8 | 13.0 |
| <i>yrhC</i> | 13.8 | 13.6 | 13.6 | 13.8 | 13.4 | 13.5 | 13.0 | 12.9 |
| <i>yrhD</i> | 12.8 | 12.8 | 12.7 | 13.3 | 12.8 | 12.9 | 12.6 | 12.8 |
| <i>ysaA</i> | 13.6 | 13.6 | 13.4 | 13.2 | 14.0 | 14.4 | 14.3 | 14.4 |
| <i>ysaB</i> | 13.9 | 13.7 | 13.6 | 13.2 | 13.5 | 13.7 | 13.2 | 13.2 |
| <i>ysdC</i> | 13.3 | 13.3 | 13.1 | 13.6 | 13.3 | 13.2 | 13.2 | 13.1 |
| <i>ysgA</i> | 15.6 | 15.7 | 15.6 | 15.6 | 14.1 | 14.4 | 14.1 | 14.2 |
| <i>yshB</i> | 18.8 | 18.9 | 18.2 | 18.5 | 18.7 | 19.0 | 18.2 | 19.2 |
| <i>yteA</i> | 12.9 | 12.8 | 12.6 | 12.9 | 12.7 | 12.8 | 12.6 | 12.6 |
| <i>ytfA</i> | 12.7 | 12.7 | 12.6 | 12.9 | 12.7 | 12.7 | 12.5 | 12.5 |
| <i>ytfB</i> | 16.0 | 16.2 | 16.1 | 15.7 | 16.1 | 16.3 | 16.1 | 16.0 |
| <i>ytfE</i> | 13.2 | 13.2 | 12.9 | 13.2 | 13.1 | 13.1 | 13.0 | 12.9 |
| <i>ytfF</i> | 13.3 | 13.3 | 13.2 | 13.2 | 12.8 | 12.8 | 12.8 | 12.8 |
| <i>ytfG</i> | 14.0 | 14.0 | 13.8 | 13.7 | 13.8 | 13.9 | 14.0 | 13.9 |
| <i>ytfH</i> | 13.8 | 13.9 | 13.6 | 14.3 | 14.1 | 13.8 | 13.8 | 13.6 |
| <i>ytfI</i> | 12.8 | 12.8 | 12.6 | 13.4 | 12.8 | 12.7 | 12.5 | 12.7 |
| <i>ytfJ</i> | 13.7 | 13.6 | 13.6 | 13.6 | 13.1 | 13.2 | 13.1 | 12.9 |
| <i>ytfK</i> | 15.5 | 15.7 | 14.8 | 14.9 | 14.3 | 14.7 | 13.7 | 14.4 |
| <i>ytfL</i> | 14.5 | 14.3 | 14.0 | 14.0 | 14.2 | 14.5 | 14.3 | 14.5 |
| <i>ytfM</i> | 14.9 | 14.8 | 14.7 | 14.7 | 14.7 | 14.9 | 14.6 | 14.7 |

|             |      |      |      |      |      |      |      |      |
|-------------|------|------|------|------|------|------|------|------|
| <i>ytfN</i> | 14.7 | 14.6 | 14.5 | 14.2 | 14.6 | 14.8 | 14.6 | 14.5 |
| <i>ytfP</i> | 16.7 | 16.6 | 16.4 | 16.4 | 16.9 | 16.8 | 16.7 | 16.5 |
| <i>ytfQ</i> | 13.8 | 13.7 | 13.7 | 13.6 | 13.3 | 13.5 | 13.3 | 13.0 |
| <i>ytfR</i> | 13.0 | 13.0 | 13.0 | 13.1 | 13.7 | 12.9 | 12.9 | 12.8 |
| <i>ytfT</i> | 13.0 | 13.1 | 12.9 | 13.2 | 13.3 | 12.9 | 13.0 | 12.8 |
| <i>ythA</i> | 13.0 | 12.9 | 12.9 | 12.8 | 13.1 | 12.9 | 12.7 | 13.1 |
| <i>ytjA</i> | 18.2 | 17.9 | 17.9 | 18.3 | 15.5 | 15.7 | 15.1 | 16.0 |
| <i>ytjB</i> | 14.9 | 14.9 | 14.9 | 14.6 | 14.8 | 15.1 | 14.8 | 14.7 |
| <i>ytjC</i> | 15.0 | 15.0 | 15.1 | 14.8 | 15.0 | 14.9 | 14.9 | 15.0 |
| <i>yzcX</i> | 13.0 | 13.0 | 12.9 | 13.2 | 13.0 | 13.2 | 13.0 | 12.9 |
| <i>yzfA</i> | 13.0 | 12.9 | 12.9 | 13.5 | 12.9 | 13.1 | 12.9 | 13.0 |
| <i>yzgL</i> | 14.6 | 14.3 | 14.0 | 14.2 | 14.3 | 14.5 | 14.2 | 14.6 |
| <i>zapA</i> | 17.4 | 17.5 | 16.7 | 16.9 | 17.6 | 17.9 | 16.6 | 17.5 |
| <i>zapB</i> | 19.0 | 18.5 | 18.2 | 18.4 | 18.5 | 18.7 | 17.6 | 18.3 |
| <i>zapC</i> | 16.2 | 16.3 | 15.7 | 16.0 | 16.4 | 16.8 | 16.4 | 16.7 |
| <i>zinT</i> | 14.2 | 13.7 | 13.3 | 13.6 | 13.2 | 13.6 | 13.0 | 13.1 |
| <i>zipA</i> | 17.0 | 16.8 | 16.6 | 16.6 | 16.8 | 17.1 | 16.8 | 17.1 |
| <i>zitB</i> | 14.3 | 14.3 | 14.2 | 14.0 | 14.3 | 14.5 | 14.4 | 14.4 |
| <i>zntA</i> | 14.3 | 15.2 | 14.7 | 13.7 | 13.9 | 15.1 | 14.5 | 13.9 |
| <i>zntR</i> | 15.4 | 15.5 | 14.8 | 15.4 | 15.7 | 15.8 | 15.3 | 15.6 |
| <i>znuA</i> | 15.6 | 15.1 | 15.1 | 15.2 | 14.9 | 15.1 | 14.6 | 14.8 |
| <i>znuB</i> | 14.3 | 14.3 | 14.1 | 14.3 | 14.1 | 14.3 | 14.2 | 14.6 |
| <i>znuC</i> | 14.8 | 14.7 | 14.5 | 14.5 | 14.7 | 15.0 | 14.7 | 15.0 |
| <i>zraP</i> | 13.0 | 13.0 | 12.9 | 13.2 | 13.8 | 13.8 | 13.5 | 13.5 |
| <i>zraR</i> | 13.7 | 13.8 | 13.5 | 13.8 | 14.0 | 13.7 | 13.8 | 13.8 |
| <i>zraS</i> | 14.2 | 13.3 | 13.2 | 15.7 | 13.4 | 13.4 | 13.3 | 13.2 |
| <i>zupT</i> | 15.4 | 15.5 | 15.2 | 15.1 | 15.3 | 15.6 | 15.2 | 15.5 |
| <i>zur</i>  | 15.1 | 15.1 | 14.6 | 14.8 | 15.3 | 15.6 | 15.1 | 15.4 |
| <i>zwf</i>  | 17.2 | 17.4 | 17.0 | 17.2 | 17.2 | 17.5 | 17.1 | 17.1 |
